# Supplementary material for: The Sequence-Specific Transcription Factor c-Jun Targets Cockayne Syndrome Protein B to Regulate Transcription and Chromatin Structure
Source: PubMed Central journal article supplement (PMC3990521; doi:10.1371/journal.pgen.1004284), 2014-04-17

A. MNase digested DNA

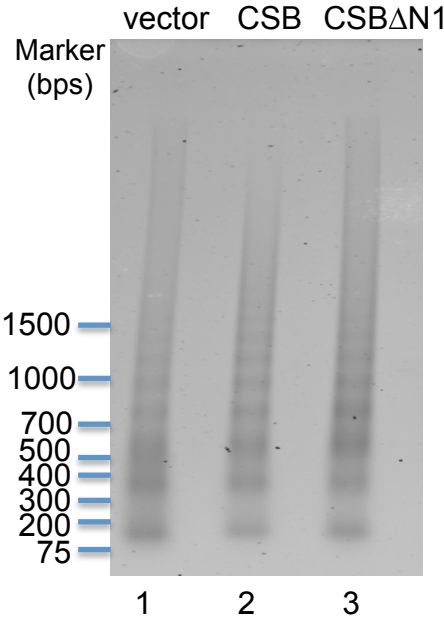

B. Mononucleosomal DNA after gel purification

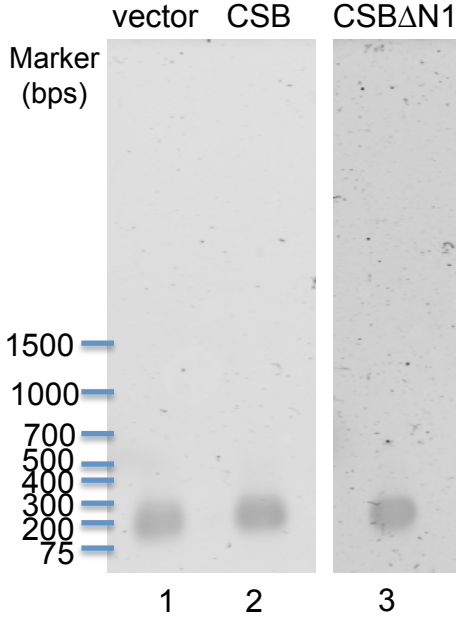

Supplement: pgen.1004284.s006.pdf [file pgen.1004284.s006.pdf]
