# Supplementary material for: The Sequence-Specific Transcription Factor c-Jun Targets Cockayne Syndrome Protein B to Regulate Transcription and Chromatin Structure
Source: PLoS Genet. 2014 Apr 17;10(4):e1004284. doi: 10.1371/journal.pgen.1004284 (PMC3990521; doi:10.1371/journal.pgen.1004284)
Supplement: Table S1 — Genomic annotation of peaks common to CSB and CSBΔN1. (XLSX) [file pgen.1004284.s008.xlsx]

## Sheet: Table S1
Table S1. Genomic annotation of peaks common to CSB and CSB∆N1
Chr	Start	End	Annotation	Detailed Annotation	Distance to TSS	Nearest PromoterID	Entrez ID	Nearest Unigene	Nearest Refseq	Nearest Ensembl	Gene Name	Gene Alias	Gene Description	Gene Type
chr1	24417871	24418040	intron (NM_152372, intron 11 of 36)	intron (NM_152372, intron 11 of 36)	20710	NM_152372	127294	Hs.523413	NM_152372	ENSG00000142661	MYOM3	RP11-293P20.1	myomesin family, member 3	protein-coding
chr1	148009121	148009290	intron (NM_015383, intron 16 of 21)	intron (NM_015383, intron 16 of 21)	16643	NM_015383	25832	Hs.738037	NM_015383	ENSG00000122497	NBPF14	DJ328E19.C1.1|NBPF	neuroblastoma breakpoint family, member 14	protein-coding
chr1	207326211	207326380	Intergenic	Intergenic	48688	NM_000715	722	Hs.1012	NM_000715	ENSG00000123838	C4BPA	C4BP|PRP	complement component 4 binding protein, alpha	protein-coding
chr1	145102974	145103143	intron (NM_004892, intron 1 of 5)	intron (NM_004892, intron 1 of 5)	6651	NM_004892	9554	Hs.715002	NM_004892		SEC22B	ERS-24|SEC22L1	SEC22 vesicle trafficking protein homolog B (S. cerevisiae) (gene/pseudogene)	protein-coding
chr1	214620347	214620516	intron (NM_005401, intron 3 of 18)	intron (NM_005401, intron 3 of 18)	104593	NM_005401	5784	Hs.193557	NM_005401	ENSG00000152104	PTPN14	PEZ|PTP36	protein tyrosine phosphatase, non-receptor type 14	protein-coding
chr1	34126420	34126589	intron (NM_052896, intron 26 of 69)	L2c|LINE|L2	188272	NM_145238	7579	Hs.442705	NM_145238	ENSG00000121903	ZSCAN20	KOX29|ZFP-31|ZNF31|ZNF360	zinc finger and SCAN domain containing 20	protein-coding
chr1	201160924	201161093	intron (NM_001164586, intron 1 of 23)	intron (NM_001164586, intron 1 of 23)	1055	NM_001164586	91156	Hs.519024	NM_001164586	ENSG00000163395	IGFN1	EEF1A2BP1	immunoglobulin-like and fibronectin type III domain containing 1	protein-coding
chr1	94158929	94159098	intron (NM_001261408, intron 3 of 13)	intron (NM_001261408, intron 3 of 13)	-11619	NM_003567	8412	Hs.36958	NM_001261408	ENSG00000137936	BCAR3	NSP2|SH2D3B	breast cancer anti-estrogen resistance 3	protein-coding
chr1	95111941	95112110	Intergenic	L2c|LINE|L2	-104612	NM_001993	2152	Hs.62192	NM_001178096	ENSG00000117525	F3	CD142|TF|TFA	coagulation factor III (thromboplastin, tissue factor)	protein-coding
chr1	203305363	203305532	Intergenic	Intergenic	14842	NM_002023	2331	Hs.519168	NM_002023	ENSG00000122176	FMOD	SLRR2E	fibromodulin	protein-coding
chr1	89500742	89500911	Intergenic	Intergenic	-12277	NM_018284	2635	Hs.720167	NM_018284	ENSG00000117226	GBP3	-	guanylate binding protein 3	protein-coding
chr1	60144632	60144801	intron (NM_001113411, intron 15 of 16)	intron (NM_001113411, intron 15 of 16)	54252	NR_039861	100616409		NR_039861		MIR4711	-	microRNA 4711	miscRNA
chr1	45024617	45024786	intron (NM_018150, intron 2 of 14)	L2b|LINE|L2	13536	NR_049849	100847089		NR_049849		MIR5584	-	microRNA 5584	miscRNA
chr1	9354167	9354336	intron (NM_025106, intron 1 of 2)	intron (NM_025106, intron 1 of 2)	1310	NM_025106	80176	Hs.738680	NM_025106	ENSG00000171621	SPSB1	SSB-1|SSB1	splA/ryanodine receptor domain and SOCS box containing 1	protein-coding
chr1	22131877	22132046	Intergenic	Intergenic	-6797	NM_001013693	401944	Hs.710255	NM_001013693	ENSG00000187942	LDLRAD2	-	low density lipoprotein receptor class A domain containing 2	protein-coding
chr1	30481578	30481747	Intergenic	(TG)n|Simple_repeat|Simple_repeat	-709957	NR_034182	100129196	Hs.659751	NR_034182		MATN1-AS1	-	MATN1 antisense RNA 1	miscRNA
chr1	144865423	144865592	intron (NM_001198832, intron 37 of 45)	intron (NM_001198832, intron 37 of 45)	66525	NM_001002811	9659	Hs.708687	NM_001002810	ENSG00000178104	PDE4DIP	CMYA2|MMGL	phosphodiesterase 4D interacting protein	protein-coding
chr1	22143290	22143459	intron (NM_001013693, intron 3 of 4)	L2a|LINE|L2	4616	NM_001013693	401944	Hs.710255	NM_001013693	ENSG00000187942	LDLRAD2	-	low density lipoprotein receptor class A domain containing 2	protein-coding
chr1	119432629	119432798	intron (NM_152380, intron 7 of 7)	intron (NM_152380, intron 7 of 7)	99466	NM_152380	6913	Hs.146196	NM_152380	ENSG00000092607	TBX15	TBX14	T-box 15	protein-coding
chr1	12498692	12498861	intron (NM_018156, intron 64 of 68)	intron (NM_018156, intron 64 of 68)	-68524	NR_003025	677885	Hs.721005	NR_003025		SNORA59A	ACA59	small nucleolar RNA, H/ACA box 59A	snoRNA
chr1	12719054	12719223	intron (NM_001013630, intron 2 of 3)	intron (NM_001013630, intron 2 of 3)	14572	NM_001013630	343066	Hs.209954	NM_001013630	ENSG00000204518	AADACL4	-	arylacetamide deacetylase-like 4	protein-coding
chr1	22904826	22904995	intron (NM_001006943, intron 3 of 4)	(TG)n|Simple_repeat|Simple_repeat	14906	NM_001006943	2046	Hs.283613	NM_001006943	ENSG00000070886	EPHA8	EEK|EK3|HEK3	EPH receptor A8	protein-coding
chr1	53564230	53564399	intron (NM_006671, intron 5 of 10)	intron (NM_006671, intron 5 of 10)	36429	NM_001199081	127435	Hs.740631	NM_001199080	ENSG00000174348	PODN	PCAN|SLRR5A	podocan	protein-coding
chr1	202872063	202872232	intron (NM_021633, intron 6 of 11)	intron (NM_021633, intron 6 of 11)	-13762	NM_002871	5877	Hs.90875	NM_002871	ENSG00000183155	RABIF	MSS4|RASGFR3|RASGRF3	RAB interacting factor	protein-coding
chr1	231761724	231761893	promoter-TSS (NM_001164550)	promoter-TSS (NM_001164550)	-753	NM_001164544	27185	Hs.13318	NM_001012957	ENSG00000162946	DISC1	C1orf136|SCZD9	disrupted in schizophrenia 1	protein-coding
chr1	28832496	28832665	non-coding (NR_002909, exon 1 of 3)	non-coding (NR_002909, exon 1 of 3)	125	NR_036473	8420	Hs.469723	NR_002909	ENSG00000242125	SNHG3	NCRNA00014|RNU17C|RNU17D|U17HG|U17HG-A|U17HG-AB	small nucleolar RNA host gene 3 (non-protein coding)	miscRNA
chr1	68850200	68850369	Intergenic	Intergenic	65358	NM_000329	6121	Hs.2133	NM_000329	ENSG00000116745	RPE65	LCA2|RP20|mRPE65|rd12|sRPE65	retinal pigment epithelium-specific protein 65kDa	protein-coding
chr1	144931307	144931476	exon (NM_001002811, exon 1 of 19)	exon (NM_001002811, exon 1 of 19)	641	NM_001002811	9659	Hs.708687	NM_001002810	ENSG00000178104	PDE4DIP	CMYA2|MMGL	phosphodiesterase 4D interacting protein	protein-coding
chr1	115711452	115711621	Intergenic	Intergenic	-79415	NM_005725	10100	Hs.310458	NM_005725	ENSG00000134198	TSPAN2	NET3|TSN2|TSPAN-2	tetraspanin 2	protein-coding
chr1	30447210	30447379	Intergenic	Intergenic	-744325	NR_034182	100129196	Hs.659751	NR_034182		MATN1-AS1	-	MATN1 antisense RNA 1	miscRNA
chr1	59495054	59495223	Intergenic	Intergenic	117341	NR_027120	729467	Hs.662291	NR_027120		HSD52	-	uncharacterized LOC729467	miscRNA
chr1	150459700	150459869	promoter-TSS (NM_025150)	promoter-TSS (NM_025150)	-136	NM_025150	80222	Hs.288974	NM_025150	ENSG00000143374	TARS2	TARSL1	threonyl-tRNA synthetase 2, mitochondrial (putative)	protein-coding
chr1	211210500	211210669	intron (NM_172362, intron 5 of 10)	MIRc|SINE|MIR	96873	NM_002238	3756	Hs.553187	NM_002238	ENSG00000143473	KCNH1	EAG|EAG1|Kv10.1|h-eag	potassium voltage-gated channel, subfamily H (eag-related), member 1	protein-coding
chr1	76251925	76252094	promoter-TSS (NR_003042)	promoter-TSS (NR_003042)	123	NM_004582	5876	Hs.78948	NM_004582	ENSG00000137955	RABGGTB	GGTB	Rab geranylgeranyltransferase, beta subunit	protein-coding
chr1	195111617	195111786	Intergenic	Intergenic	1439910	NR_039888	100616363		NR_039888		MIR4735	-	microRNA 4735	miscRNA
chr1	201853039	201853208	3' UTR (NM_018085, exon 24 of 24)	3' UTR (NM_018085, exon 24 of 24)	-4674	NR_030775	149345	Hs.632471	NM_198149	ENSG00000198892	SHISA4	C1orf40|TMEM58	shisa homolog 4 (Xenopus laevis)	protein-coding
chr1	10721599	10721768	intron (NM_017766, intron 5 of 15)	(CA)n|Simple_repeat|Simple_repeat	135050	NM_001079843	54897	Hs.439894	NM_001079843	ENSG00000130940	CASZ1	CAS11|CST|SRG|ZNF693|dJ734G22.1	castor zinc finger 1	protein-coding
chr1	151284161	151284330	intron (NM_002651, intron 3 of 12)	intron (NM_002651, intron 3 of 12)	15888	NM_001198775	5298	Hs.632465	NM_001198773	ENSG00000143393	PI4KB	NPIK|PI4K-BETA|PI4K92|PI4KBETA|PI4KIIIBETA|PIK4CB	phosphatidylinositol 4-kinase, catalytic, beta	protein-coding
chr1	202792333	202792502	Intergenic	Intergenic	-1912	NR_038135	641515	Hs.23459	NR_038135		LOC641515	-	uncharacterized LOC641515	pseudo
chr1	115794531	115794700	Intergenic	LTR79|LTR|ERVL	86242	NM_002506	4803	Hs.2561	NM_002506	ENSG00000134259	NGF	Beta-NGF|HSAN5|NGFB	nerve growth factor (beta polypeptide)	protein-coding
chr1	115973492	115973661	Intergenic	Intergenic	-92719	NM_002506	4803	Hs.2561	NM_002506	ENSG00000134259	NGF	Beta-NGF|HSAN5|NGFB	nerve growth factor (beta polypeptide)	protein-coding
chr1	87628884	87629053	intron (NR_026989, intron 2 of 2)	intron (NR_026989, intron 2 of 2)	31359	NR_026985	339524	Hs.306423	NM_207357		LOC339524	-	uncharacterized LOC339524	miscRNA
chr1	15505744	15505913	intron (NM_018022, intron 1 of 2)	L1ME2|LINE|L1	25599	NM_001136218	55092	Hs.465305	NM_001136216	ENSG00000171729	TMEM51	C1orf72	transmembrane protein 51	protein-coding
chr1	235097593	235097762	Intergenic	Intergenic	193575	NR_002956	677802	Hs.533192	NR_002956		SNORA14B	ACA14b	small nucleolar RNA, H/ACA box 14B	snoRNA
chr1	226824587	226824756	intron (NM_002221, intron 7 of 7)	(TG)n|Simple_repeat|Simple_repeat	88170	NM_001003665	375057	Hs.116827	NM_001003665	ENSG00000203685	C1orf95	-	chromosome 1 open reading frame 95	protein-coding
chr1	59314478	59314647	intron (NR_034014, intron 1 of 3)	intron (NR_034014, intron 1 of 3)	63739	NR_034015	100131060	Hs.680604	NR_034014		LOC100131060	-	uncharacterized LOC100131060	miscRNA
chr1	204476149	204476318	Intergenic	Intergenic	-9274	NM_001204172	4194	Hs.497492	NM_001204171	ENSG00000198625	MDM4	HDMX|MDMX|MRP1	Mdm4 p53 binding protein homolog (mouse)	protein-coding
chr1	202864806	202864975	intron (NM_021633, intron 7 of 11)	intron (NM_021633, intron 7 of 11)	-6505	NM_002871	5877	Hs.90875	NM_002871	ENSG00000183155	RABIF	MSS4|RASGFR3|RASGRF3	RAB interacting factor	protein-coding
chr1	145043056	145043225	intron (NM_022359, intron 1 of 6)	MLT1H|LTR|ERVL-MaLR	-3148	NM_001198832	9659	Hs.708687	NM_001002810	ENSG00000178104	PDE4DIP	CMYA2|MMGL	phosphodiesterase 4D interacting protein	protein-coding
chr1	210566717	210566886	intron (NM_001170564, intron 4 of 9)	L2c|LINE|L2	64161	NM_001170580	55733	Hs.58650	NM_001122834	ENSG00000054392	HHAT	MART2|SKI1|Skn	hedgehog acyltransferase	protein-coding
chr1	38715282	38715451	Intergenic	Intergenic	-34927	NR_038928	339442	Hs.434245	NR_038928		LOC339442	-	uncharacterized LOC339442	miscRNA
chr1	88114567	88114736	Intergenic	MIRb|SINE|MIR	-277313	NR_038324	100505768	Hs.125247	NR_038324		LOC100505768	-	uncharacterized LOC100505768	miscRNA
chr1	62713618	62713787	intron (NM_181712, intron 8 of 9)	L2c|LINE|L2	53228	NM_019079	54596	Hs.685462	NM_001164835	ENSG00000240563	L1TD1	ECAT11|RP5-1155K23.3	LINE-1 type transposase domain containing 1	protein-coding
chr1	81974042	81974211	Intergenic	MER45B|DNA|hAT-Tip100	-291956	NM_012302	23266	Hs.649282	NM_012302	ENSG00000117114	LPHN2	CIRL2|CL2|LEC1|LPHH1	latrophilin 2	protein-coding
chr1	230220433	230220602	intron (NM_004481, intron 1 of 15)	intron (NM_004481, intron 1 of 15)	17561	NM_004481	2590	Hs.731416	NM_004481	ENSG00000143641	GALNT2	GalNAc-T2	UDP-N-acetyl-alpha-D-galactosamine:polypeptide N-acetylgalactosaminyltransferase 2 (GalNAc-T2)	protein-coding
chr1	218670021	218670190	Intergenic	Intergenic	-151085	NR_046268	728463	Hs.568469	NR_046268		LOC728463	-	uncharacterized LOC728463	miscRNA
chr1	90818731	90818900	Intergenic	Intergenic	358137	NM_182976	284695	Hs.306221	NM_181781	ENSG00000162664	ZNF326	ZAN75|ZIRD|Zfp326|dJ871E2.1	zinc finger protein 326	protein-coding
chr1	59525128	59525297	Intergenic	Intergenic	87267	NR_027120	729467	Hs.662291	NR_027120		HSD52	-	uncharacterized LOC729467	miscRNA
chr1	223384600	223384769	Intergenic	Intergenic	-68060	NM_003268	7100	Hs.604542	NM_003268	ENSG00000187554	TLR5	SLEB1|TIL3	toll-like receptor 5	protein-coding
chr1	205448362	205448531	Intergenic	Intergenic	-25238	NM_212503	5129	Hs.445402	NM_002596	ENSG00000117266	CDK18	PCTAIRE|PCTAIRE3|PCTK3	cyclin-dependent kinase 18	protein-coding
chr1	118128964	118129133	Intergenic	Intergenic	-19556	NM_017709	54855	Hs.356216	NM_017709	ENSG00000183508	FAM46C	-	family with sequence similarity 46, member C	protein-coding
chr1	244437387	244437556	Intergenic	Intergenic	-78466	NM_001012970	200159	Hs.442703	NM_001012970	ENSG00000173728	C1orf100	-	chromosome 1 open reading frame 100	protein-coding
chr1	27726436	27726605	Intergenic	Intergenic	7368	NM_005281	2827	Hs.66542	NM_005281	ENSG00000181773	GPR3	ACCA	G protein-coupled receptor 3	protein-coding
chr1	30086823	30086992	Intergenic	L2|LINE|L2	523879	NM_001195001	10076	Hs.19718	NM_001195001	ENSG00000060656	PTPRU	FMI|PCP-2|PTP|PTP-J|PTP-PI|PTP-RO|PTPPSI|PTPRO|PTPU2|R-PTP-PSI|R-PTP-U|hPTP-J	protein tyrosine phosphatase, receptor type, U	protein-coding
chr1	222340609	222340778	Intergenic	Intergenic	380751	NM_024746	79802	Hs.665660	NM_024746	ENSG00000143512	HHIPL2	KIAA1822L	HHIP-like 2	protein-coding
chr1	167684722	167684891	Intergenic	Intergenic	-6381	NM_024569	9019	Hs.493919	NM_001146191	ENSG00000197965	MPZL1	MPZL1b|PZR|PZR1b|PZRa|PZRb	myelin protein zero-like 1	protein-coding
chr1	222161348	222161517	Intergenic	Intergenic	-245916	NM_144729	11221	Hs.732301	NM_007207	ENSG00000143507	DUSP10	MKP-5|MKP5	dual specificity phosphatase 10	protein-coding
chr1	20088612	20088781	intron (NM_181719, intron 6 of 15)	intron (NM_181719, intron 6 of 15)	37714	NM_181719	255104	Hs.656313	NM_181719	ENSG00000162542	TMCO4	RP5-1056L3.6	transmembrane and coiled-coil domains 4	protein-coding
chr1	205280759	205280928	exon (NM_030952, exon 2 of 7)	exon (NM_030952, exon 2 of 7)	10040	NM_030952	81788	Hs.497512	NM_030952	ENSG00000163545	NUAK2	SNARK	NUAK family, SNF1-like kinase, 2	protein-coding
chr1	725862	726031	Intergenic	(GAATG)n|Satellite|Satellite	-11878	NR_033908	100288069	Hs.527521	NR_033908		LOC100288069	-	general transcription factor IIi pseudogene	pseudo
chr1	23718712	23718881	intron (NM_003196, intron 8 of 10)	(CA)n|Simple_repeat|Simple_repeat	-22439	NM_001077195	80818	Hs.293798	NM_001077195	ENSG00000125945	ZNF436	ZNF|Zfp46	zinc finger protein 436	protein-coding
chr1	16351785	16351954	intron (NM_001042704, intron 4 of 19)	MIRb|SINE|MIR	3383	NM_001257139	1187	Hs.591533	XM_003846620	ENSG00000186510	CLCNKA	CLCK1|ClC-K1|hClC-Ka	chloride channel, voltage-sensitive Ka	protein-coding
chr1	28975060	28975229	promoter-TSS (NR_004407)	promoter-TSS (NR_004407)	32	NR_004407	26824	Hs.640266	NR_004407		RNU11	U11	RNA, U11 small nuclear	snRNA
chr1	31289679	31289848	Intergenic	Intergenic	-59080	NM_006762	7805	Hs.371021	NM_006762	ENSG00000162511	LAPTM5	CLAST6	lysosomal protein transmembrane 5	protein-coding
chr1	41905089	41905258	Intergenic	ERVL-E-int|LTR|ERVL	45171	NM_001956	1907	Hs.1407	NM_001956	ENSG00000127129	EDN2	ET2|PPET2	endothelin 2	protein-coding
chr1	59221287	59221456	Intergenic	Intergenic	28414	NM_002228	3725	Hs.696684	NM_002228	ENSG00000177606	JUN	AP-1|AP1|c-Jun	jun proto-oncogene	protein-coding
chr1	203124571	203124740	intron (NM_000674, intron 3 of 3)	intron (NM_000674, intron 3 of 3)	20287	NM_004997	4608	Hs.927	NM_004997	ENSG00000133055	MYBPH	-	myosin binding protein H	protein-coding
chr1	236260597	236260766	Intergenic	LTR10A|LTR|ERV1	-32200	NM_002508	4811	Hs.356624	NM_002508	ENSG00000116962	NID1	NID	nidogen 1	protein-coding
chr1	11547877	11548046	intron (NM_020780, intron 1 of 20)	intron (NM_020780, intron 1 of 20)	8666	NM_020780	57540	Hs.202355	NM_020780	ENSG00000204624	PTCHD2	DISP3	patched domain containing 2	protein-coding
chr1	27935190	27935359	Intergenic	Intergenic	-5131	NM_001029882	27245	Hs.469280	NM_001029882	ENSG00000126705	AHDC1	CL23945|DJ159A19.3|RP1-159A19.1	AT hook, DNA binding motif, containing 1	protein-coding
chr1	18614872	18615041	intron (NM_032880, intron 2 of 9)	intron (NM_032880, intron 2 of 9)	180716	NM_032880	84966	Hs.212511	NM_032880	ENSG00000117154	IGSF21	-	immunoglobin superfamily, member 21	protein-coding
chr1	28836684	28836853	non-coding (NR_002909, exon 3 of 3)	non-coding (NR_002909, exon 3 of 3)	4313	NR_036473	8420	Hs.469723	NR_002909	ENSG00000242125	SNHG3	NCRNA00014|RNU17C|RNU17D|U17HG|U17HG-A|U17HG-AB	small nucleolar RNA host gene 3 (non-protein coding)	miscRNA
chr1	18244055	18244224	Intergenic	Intergenic	162331	NM_030812	81569	Hs.2149	NM_030812	ENSG00000117148	ACTL8	CT57	actin-like 8	protein-coding
chr1	228122699	228122868	intron (NM_003395, intron 1 of 3)	intron (NM_003395, intron 1 of 3)	6601	NR_049806	100847072		NR_049806		MIR5008	-	microRNA 5008	miscRNA
chr1	204110824	204110993	intron (NM_018208, intron 3 of 7)	intron (NM_018208, intron 3 of 7)	10399	NM_018208	55224	Hs.497469	NM_018208	ENSG00000143845	ETNK2	EKI2|HMFT1716	ethanolamine kinase 2	protein-coding
chr1	205287307	205287476	intron (NM_030952, intron 1 of 6)	intron (NM_030952, intron 1 of 6)	3492	NM_030952	81788	Hs.497512	NM_030952	ENSG00000163545	NUAK2	SNARK	NUAK family, SNF1-like kinase, 2	protein-coding
chr1	33899481	33899650	Intergenic	Intergenic	-38667	NM_145238	7579	Hs.442705	NM_145238	ENSG00000121903	ZSCAN20	KOX29|ZFP-31|ZNF31|ZNF360	zinc finger and SCAN domain containing 20	protein-coding
chr1	224752915	224753084	Intergenic	Intergenic	-51180	NM_152495	149111	Hs.731723	NM_152495	ENSG00000143786	CNIH3	CNIH-3	cornichon homolog 3 (Drosophila)	protein-coding
chr1	85770141	85770310	Intergenic	Intergenic	-27638	NM_003921	8915	Hs.193516	NM_003921	ENSG00000142867	BCL10	CARMEN|CIPER|CLAP|c-E10|mE10	B-cell CLL/lymphoma 10	protein-coding
chr1	54362666	54362835	intron (NM_001039715, intron 1 of 2)	intron (NM_001039715, intron 1 of 2)	2889	NM_213593	1733	Hs.251415	NM_000792	ENSG00000211452	DIO1	5DI|TXDI1	deiodinase, iodothyronine, type I	protein-coding
chr1	161582448	161582617	Intergenic	tRNA-Gly-GGA|tRNA|tRNA	6683	NR_024151	3311	Hs.662180	NR_024151		HSPA7	HSP70B	heat shock 70kDa protein 7 (HSP70B)	pseudo
chr1	152878584	152878753	Intergenic	Intergenic	-2371	NM_005547	3713	Hs.516439	NM_005547	ENSG00000163207	IVL	-	involucrin	protein-coding
chr1	85779132	85779301	Intergenic	MSTD|LTR|ERVL-MaLR	-36629	NM_003921	8915	Hs.193516	NM_003921	ENSG00000142867	BCL10	CARMEN|CIPER|CLAP|c-E10|mE10	B-cell CLL/lymphoma 10	protein-coding
chr1	221130658	221130827	Intergenic	Intergenic	77999	NM_021958	3142	Hs.74870	NM_021958	ENSG00000136630	HLX	HB24|HLX1	H2.0-like homeobox	protein-coding
chr1	44301400	44301569	intron (NM_174971, intron 4 of 11)	intron (NM_174971, intron 4 of 11)	-97508	NM_001136215	9048	Hs.632404	NM_001136215	ENSG00000117407	ARTN	ENOVIN|EVN|NBN	artemin	protein-coding
chr1	32230375	32230544	promoter-TSS (NM_001703)	promoter-TSS (NM_001703)	-811	NM_001703	576	Hs.524138	NM_001703	ENSG00000121753	BAI2	-	brain-specific angiogenesis inhibitor 2	protein-coding
chr1	153677974	153678143	Intergenic	MER66B|LTR|ERV1	-22509	NM_023015	65123	Hs.516522	NM_023015	ENSG00000143624	INTS3	C1orf193|C1orf60|INT3|SOSS-A	integrator complex subunit 3	protein-coding
chr1	31918628	31918797	Intergenic	Intergenic	32052	NM_018565	347735	Hs.270655	NM_001199037	ENSG00000168528	SERINC2	PRO0899|TDE2|TDE2L	serine incorporator 2	protein-coding
chr1	227955372	227955541	intron (NM_053052, intron 4 of 4)	(TG)n|Simple_repeat|Simple_repeat	-32344	NM_001161465	65094	Hs.730779	NM_001161465	ENSG00000081692	JMJD4	-	jumonji domain containing 4	protein-coding
chr1	200452693	200452862	Intergenic	MER5B|DNA|hAT-Charlie	-73611	NM_012482	23528	Hs.735801	NM_012482	ENSG00000162702	ZNF281	ZBP-99|ZNP-99	zinc finger protein 281	protein-coding
chr1	79789125	79789294	Intergenic	Intergenic	-316714	NM_022159	64123	Hs.132314	NM_022159	ENSG00000162618	ELTD1	ETL|KPG_003	EGF, latrophilin and seven transmembrane domain containing 1	protein-coding
chr1	4845961	4846130	Intergenic	Intergenic	130940	NM_018836	55966	Hs.25924	NM_001042478	ENSG00000196581	AJAP1	MOT8|RP3-426F10.1|SHREW-1|SHREW1	adherens junctions associated protein 1	protein-coding
chr1	17450406	17450575	Intergenic	MLT2C2|LTR|ERVL	-4542	NM_007365	11240	Hs.33455	NM_007365	ENSG00000117115	PADI2	PAD-H19|PAD2|PDI2	peptidyl arginine deiminase, type II	protein-coding
chr1	120467572	120467741	intron (NM_024408, intron 25 of 33)	intron (NM_024408, intron 25 of 33)	-28509	NM_021794	11085	Hs.283011	NM_021794	ENSG00000134249	ADAM30	svph4	ADAM metallopeptidase domain 30	protein-coding
chr1	203238287	203238456	Intergenic	Intergenic	36082	NR_034151	730227	Hs.293928	NR_034150		LOC730227	-	uncharacterized LOC730227	miscRNA
chr1	224201401	224201570	Intergenic	(GAATG)n|Satellite|Satellite	-100304	NR_049764	23219	Hs.64691	NM_001136115	ENSG00000143756	FBXO28	CENP-30|Fbx28	F-box protein 28	protein-coding
chr1	226388340	226388509	Intergenic	MIR|SINE|MIR	-14001	NM_022735	64746	Hs.520207	NM_022735	ENSG00000182827	ACBD3	GCP60|GOCAP1|GOLPH1|PAP7	acyl-CoA binding domain containing 3	protein-coding
chr1	12046150	12046319	intron (NM_014874, intron 2 of 18)	intron (NM_014874, intron 2 of 18)	5996	NM_014874	9927	Hs.376681	NM_001127660	ENSG00000116688	MFN2	CMT2A|CMT2A2|CPRP1|HSG|MARF	mitofusin 2	protein-coding
chr1	236260589	236260758	Intergenic	LTR10A|LTR|ERV1	-32192	NM_002508	4811	Hs.356624	NM_002508	ENSG00000116962	NID1	NID	nidogen 1	protein-coding
chr1	35055488	35055657	Intergenic	Intergenic	-165149	NM_005268	2709	Hs.198249	NM_005268	ENSG00000189280	GJB5	CX31.1	gap junction protein, beta 5, 31.1kDa	protein-coding
chr1	77713187	77713356	Intergenic	L1MA4|LINE|L1	-28139	NM_005482	10026	Hs.178305	NM_005482	ENSG00000142892	PIGK	GPI8	phosphatidylinositol glycan anchor biosynthesis, class K	protein-coding
chr1	119878186	119878355	Intergenic	Intergenic	-33132	NM_016527	51179	Hs.659767	NM_001005783	ENSG00000116882	HAO2	GIG16|HAOX2	hydroxyacid oxidase 2 (long chain)	protein-coding
chr1	201510221	201510390	Intergenic	L2c|LINE|L2	21273	NR_026667	376693	Hs.605989	NR_026667		RPS10P7	RPS10_2_147	ribosomal protein S10 pseudogene 7	pseudo
chr1	66286736	66286905	intron (NM_002600, intron 1 of 16)	intron (NM_002600, intron 1 of 16)	27964	NM_002600	5142	Hs.198072	NM_001037339	ENSG00000184588	PDE4B	DPDE4|PDE4B5|PDEIVB	phosphodiesterase 4B, cAMP-specific	protein-coding
chr1	110023360	110023529	3' UTR (NM_001040709, exon 6 of 6)	3' UTR (NM_001040709, exon 6 of 6)	-3117	NM_153340	127002	Hs.118248	NM_153340	ENSG00000162650	ATXN7L2	-	ataxin 7-like 2	protein-coding
chr1	68306210	68306379	intron (NR_040077, intron 1 of 9)	intron (NR_040077, intron 1 of 9)	-7139	NM_018841	55970	Hs.741259	NM_018841	ENSG00000172380	GNG12	-	guanine nucleotide binding protein (G protein), gamma 12	protein-coding
chr1	8457229	8457398	intron (NM_001042682, intron 2 of 12)	MIR|SINE|MIR	26434	NM_001042682	473	Hs.463041	NM_001042681	ENSG00000142599	RERE	ARG|ARP|ATN1L|DNB1	arginine-glutamic acid dipeptide (RE) repeats	protein-coding
chr1	201850815	201850984	3' UTR (NM_018085, exon 24 of 24)	3' UTR (NM_018085, exon 24 of 24)	-6898	NR_030775	149345	Hs.632471	NM_198149	ENSG00000198892	SHISA4	C1orf40|TMEM58	shisa homolog 4 (Xenopus laevis)	protein-coding
chr1	2187090	2187259	intron (NM_003036, intron 1 of 6)	intron (NM_003036, intron 1 of 6)	27040	NM_003036	6497	Hs.656507	NM_003036	ENSG00000157933	SKI	SKV	v-ski sarcoma viral oncogene homolog (avian)	protein-coding
chr1	17029922	17030091	intron (NR_026567, intron 5 of 10)	intron (NR_026567, intron 5 of 10)	16646	NR_026567	284729	Hs.548239	NR_026567		ESPNP	RP1-163M9.1|dJ1182A14.1	espin pseudogene	pseudo
chr1	161493622	161493791	promoter-TSS (NM_002155)	promoter-TSS (NM_002155)	-330	NM_002155	3310	Hs.654614	NM_002155	ENSG00000173110	HSPA6	-	heat shock 70kDa protein 6 (HSP70B')	protein-coding
chr1	32039861	32040030	Intergenic	(CAGA)n|Simple_repeat|Simple_repeat	-2141	NM_001204414	64129	Hs.199368	NM_001204414	ENSG00000142910	TINAGL1	ARG1|LCN7|LIECG3|TINAGRP	tubulointerstitial nephritis antigen-like 1	protein-coding
chr1	27949856	27950025	intron (NM_001042747, intron 3 of 12)	intron (NM_001042747, intron 3 of 12)	2811	NM_001042747	2268	Hs.1422	NM_001042729	ENSG00000000938	FGR	SRC2|c-fgr|c-src2|p55-Fgr|p55c-fgr|p58-Fgr|p58c-fgr	Gardner-Rasheed feline sarcoma viral (v-fgr) oncogene homolog	protein-coding
chr1	233248763	233248932	intron (NM_014801, intron 21 of 33)	intron (NM_014801, intron 21 of 33)	162477	NM_032324	84284	Hs.642715	NM_032324	ENSG00000135778	NTPCR	C1orf57|HCR-NTPase|RP4-678E16.2	nucleoside-triphosphatase, cancer-related	protein-coding
chr1	101062737	101062906	Intergenic	MLT1J2|LTR|ERVL-MaLR	49739	NR_038914	100128787	Hs.536050	NR_038914		LOC100128787	-	uncharacterized LOC100128787	miscRNA
chr1	204293121	204293290	intron (NM_014935, intron 1 of 22)	intron (NM_014935, intron 1 of 22)	35852	NM_014935	22874	Hs.253146	NM_138480	ENSG00000143850	PLEKHA6	PEPP-3|PEPP3	pleckstrin homology domain containing, family A member 6	protein-coding
chr1	34922227	34922396	Intergenic	Intergenic	279758	NM_001134734	84970	Hs.194610	NM_001134734	ENSG00000142698	C1orf94	-	chromosome 1 open reading frame 94	protein-coding
chr1	230220446	230220615	intron (NM_004481, intron 1 of 15)	intron (NM_004481, intron 1 of 15)	17574	NM_004481	2590	Hs.731416	NM_004481	ENSG00000143641	GALNT2	GalNAc-T2	UDP-N-acetyl-alpha-D-galactosamine:polypeptide N-acetylgalactosaminyltransferase 2 (GalNAc-T2)	protein-coding
chr1	43941806	43941975	Intergenic	Intergenic	-22230	NM_001243526	81888	Hs.709864	NM_001190880	ENSG00000178922	HYI	HT036	hydroxypyruvate isomerase (putative)	protein-coding
chr1	60083481	60083650	intron (NM_001113411, intron 9 of 16)	intron (NM_001113411, intron 9 of 16)	115403	NR_039861	100616409		NR_039861		MIR4711	-	microRNA 4711	miscRNA
chr1	215164093	215164262	Intergenic	L2a|LINE|L2	-14708	NM_001017424	3776	Hs.497745	NM_001017424	ENSG00000082482	KCNK2	K2p2.1|TPKC1|TREK|TREK-1|TREK1|hTREK-1c|hTREK-1e	potassium channel, subfamily K, member 2	protein-coding
chr1	22905802	22905971	intron (NM_001006943, intron 3 of 4)	(TATG)n|Simple_repeat|Simple_repeat	15882	NM_001006943	2046	Hs.283613	NM_001006943	ENSG00000070886	EPHA8	EEK|EK3|HEK3	EPH receptor A8	protein-coding
chr1	36033684	36033853	Intergenic	L2|LINE|L2	-5203	NM_178548	339488	Hs.567844	NM_178548	ENSG00000116819	TFAP2E	AP2E	transcription factor AP-2 epsilon (activating enhancer binding protein 2 epsilon)	protein-coding
chr1	8457204	8457373	intron (NM_001042682, intron 2 of 12)	MIR|SINE|MIR	26459	NM_001042682	473	Hs.463041	NM_001042681	ENSG00000142599	RERE	ARG|ARP|ATN1L|DNB1	arginine-glutamic acid dipeptide (RE) repeats	protein-coding
chr1	50745539	50745708	Intergenic	L2b|LINE|L2	143496	NM_032110	63950	Hs.334481	NM_032110	ENSG00000142700	DMRTA2	-	DMRT-like family A2	protein-coding
chr1	162724678	162724847	intron (NM_006182, intron 5 of 17)	intron (NM_006182, intron 5 of 17)	-35734	NM_016371	51478	Hs.492925	NM_016371	ENSG00000132196	HSD17B7	PRAP|SDR37C1	hydroxysteroid (17-beta) dehydrogenase 7	protein-coding
chr1	145399229	145399398	Intergenic	Intergenic	-13878	NM_213653	148738	Hs.632436	NM_145277	ENSG00000168509	HFE2	HFE2A|HJV|JH|RGMC	hemochromatosis type 2 (juvenile)	protein-coding
chr1	59483566	59483735	Intergenic	Intergenic	128829	NR_027120	729467	Hs.662291	NR_027120		HSD52	-	uncharacterized LOC729467	miscRNA
chr1	94158928	94159097	intron (NM_001261408, intron 3 of 13)	intron (NM_001261408, intron 3 of 13)	-11618	NM_003567	8412	Hs.36958	NM_001261408	ENSG00000137936	BCAR3	NSP2|SH2D3B	breast cancer anti-estrogen resistance 3	protein-coding
chr1	203637196	203637365	intron (NM_001001396, intron 1 of 21)	intron (NM_001001396, intron 1 of 21)	41365	NM_001684	493	Hs.733333	NM_001001396	ENSG00000058668	ATP2B4	ATP2B2|MXRA1|PMCA4|PMCA4b|PMCA4x	ATPase, Ca++ transporting, plasma membrane 4	protein-coding
chr1	32701780	32701949	intron (NR_026850, intron 3 of 6)	MER44D|DNA|TcMar-Tigger	5447	NR_026850	339483	Hs.471067	NR_026850		MTMR9LP	MTMR9L	myotubularin related protein 9-like, pseudogene	pseudo
chr1	12242607	12242776	intron (NM_001066, intron 1 of 9)	MIRb|SINE|MIR	-9071	NR_039775	100616438		NR_039775		MIR4632	-	microRNA 4632	miscRNA
chr1	42372964	42373133	intron (NR_038260, intron 1 of 2)	intron (NR_038260, intron 1 of 2)	11330	NM_024503	59269	Hs.648369	NM_001127714	ENSG00000127124	HIVEP3	KBP-1|KBP1|KRC|SHN3|Schnurri-3|ZAS3|ZNF40C	human immunodeficiency virus type I enhancer binding protein 3	protein-coding
chr1	226837171	226837340	intron (NM_002221, intron 2 of 7)	(TG)n|Simple_repeat|Simple_repeat	89621	NM_002221	3707	Hs.741374	NM_002221	ENSG00000143772	ITPKB	IP3-3KB|IP3K|IP3K-B|IP3KB|PIG37	inositol-trisphosphate 3-kinase B	protein-coding
chr1	64598865	64599034	intron (NM_005012, intron 4 of 8)	L2c|LINE|L2	-70541	NM_152489	148581	Hs.388746	NM_152489	ENSG00000177414	UBE2U	RP4-636O23.1	ubiquitin-conjugating enzyme E2U (putative)	protein-coding
chr1	26384075	26384244	intron (NM_032588, intron 5 of 8)	intron (NM_032588, intron 5 of 8)	9966	NM_032588	84676	Hs.279709	NM_032588	ENSG00000158022	TRIM63	IRF|MURF1|MURF2|RNF28|SMRZ	tripartite motif containing 63, E3 ubiquitin protein ligase	protein-coding
chr1	169083001	169083170	intron (NM_001677, intron 2 of 5)	intron (NM_001677, intron 2 of 5)	7138	NM_001677	481	Hs.291196	NM_001677	ENSG00000143153	ATP1B1	ATP1B	ATPase, Na+/K+ transporting, beta 1 polypeptide	protein-coding
chr1	98552426	98552595	Intergenic	L2b|LINE|L2	-37261	NR_046105	400765	Hs.451802	NM_001001688		MIR137HG	-	MIR137 host gene (non-protein coding)	miscRNA
chr1	246305804	246305973	intron (NM_022743, intron 5 of 11)	MER44C|DNA|TcMar-Tigger	274826	NM_022743	64754	Hs.567571	NM_001167740	ENSG00000185420	SMYD3	KMT3E|ZMYND1|ZNFN3A1|bA74P14.1	SET and MYND domain containing 3	protein-coding
chr1	111973795	111973964	Intergenic	MER20|DNA|hAT-Charlie	-3480	NM_002557	5016	Hs.1154	NM_002557	ENSG00000085465	OVGP1	CHIT5|EGP|MUC9|OGP	oviductal glycoprotein 1, 120kDa	protein-coding
chr1	161500811	161500980	Intergenic	Intergenic	6859	NM_002155	3310	Hs.654614	NM_002155	ENSG00000173110	HSPA6	-	heat shock 70kDa protein 6 (HSP70B')	protein-coding
chr1	96939444	96939613	Intergenic	Intergenic	-247647	NM_021190	58155	Hs.596061	NM_021190	ENSG00000117569	PTBP2	PTB|PTBLP|brPTB|nPTB|nPTB5|nPTB6|nPTB7|nPTB8	polypyrimidine tract binding protein 2	protein-coding
chr1	145002617	145002786	intron (NM_022359, intron 3 of 6)	MIRc|SINE|MIR	-5590	NM_001195260	9659	Hs.708687	NM_001002810	ENSG00000178104	PDE4DIP	CMYA2|MMGL	phosphodiesterase 4D interacting protein	protein-coding
chr1	145034119	145034288	intron (NM_022359, intron 1 of 6)	MLT1D|LTR|ERVL-MaLR	5789	NM_001198832	9659	Hs.708687	NM_001002810	ENSG00000178104	PDE4DIP	CMYA2|MMGL	phosphodiesterase 4D interacting protein	protein-coding
chr1	16948019	16948188	intron (NR_026752, intron 5 of 6)	intron (NR_026752, intron 5 of 6)	-8121	NM_017940	55672	Hs.732154	NM_017940		NBPF1	AB13|AB14|AB23|AD2|NBG|NBPF	neuroblastoma breakpoint family, member 1	protein-coding
chr1	93374903	93375072	intron (NM_001252270, intron 1 of 3)	LTR78|LTR|ERV1	-32280	NM_001252271	388650	Hs.180946	NM_001006605	ENSG00000154511	FAM69A	-	family with sequence similarity 69, member A	protein-coding
chr1	203527457	203527626	Intergenic	MIRb|SINE|MIR	64270	NM_014359	26254	Hs.632468	NM_014359	ENSG00000188770	OPTC	OPT	opticin	protein-coding
chr1	15068973	15069142	intron (NM_201628, intron 1 of 14)	intron (NM_201628, intron 1 of 14)	143844	NM_201628	23254	Hs.368823	NM_001017999	ENSG00000189337	KAZN	KAZ	kazrin, periplakin interacting protein	protein-coding
chr1	16893599	16893768	exon (NM_017940, exon 25 of 29)	exon (NM_017940, exon 25 of 29)	18274	NR_037446	100500876		NR_037446		MIR3675	-	microRNA 3675	miscRNA
chr1	202554459	202554628	3' UTR (NM_002481, exon 24 of 24)	3' UTR (NM_002481, exon 24 of 24)	45301	NM_001197131	4660	Hs.444403	NM_001167857	ENSG00000077157	PPP1R12B	MYPT2|PP1bp55	protein phosphatase 1, regulatory subunit 12B	protein-coding
chr1	23005534	23005703	Intergenic	(CA)n|Simple_repeat|Simple_repeat	25936	NM_000491	713	Hs.8986	NM_000491	ENSG00000173369	C1QB	-	complement component 1, q subcomponent, B chain	protein-coding
chr1	23005666	23005835	Intergenic	(CA)n|Simple_repeat|Simple_repeat	26068	NM_000491	713	Hs.8986	NM_000491	ENSG00000173369	C1QB	-	complement component 1, q subcomponent, B chain	protein-coding
chr1	169082918	169083087	intron (NM_001677, intron 2 of 5)	intron (NM_001677, intron 2 of 5)	7055	NM_001677	481	Hs.291196	NM_001677	ENSG00000143153	ATP1B1	ATP1B	ATPase, Na+/K+ transporting, beta 1 polypeptide	protein-coding
chr1	27726472	27726641	Intergenic	Intergenic	7404	NM_005281	2827	Hs.66542	NM_005281	ENSG00000181773	GPR3	ACCA	G protein-coupled receptor 3	protein-coding
chr1	64472504	64472673	intron (NM_005012, intron 1 of 8)	intron (NM_005012, intron 1 of 8)	-196902	NM_152489	148581	Hs.388746	NM_152489	ENSG00000177414	UBE2U	RP4-636O23.1	ubiquitin-conjugating enzyme E2U (putative)	protein-coding
chr1	20466993	20467162	intron (NM_022819, intron 2 of 4)	intron (NM_022819, intron 2 of 4)	1254	NM_022819	64600	Hs.302034	NM_022819	ENSG00000158786	PLA2G2F	-	phospholipase A2, group IIF	protein-coding
chr1	53562339	53562508	intron (NM_006671, intron 5 of 10)	intron (NM_006671, intron 5 of 10)	34538	NM_001199081	127435	Hs.740631	NM_001199080	ENSG00000174348	PODN	PCAN|SLRR5A	podocan	protein-coding
chr1	148241444	148241613	Intergenic	U1|snRNA|snRNA	-38992	NM_001164261	645142	Hs.730589	NM_001164261	ENSG00000256374	PPIAL4D	-	peptidylprolyl isomerase A (cyclophilin A)-like 4D	protein-coding
chr1	86879038	86879207	Intergenic	HERVL18-int|LTR|ERVL	-10647	NM_006536	9635	Hs.241551	NM_006536	ENSG00000137975	CLCA2	CACC|CACC3|CLCRG2|CaCC-3	chloride channel accessory 2	protein-coding
chr1	86072769	86072938	Intergenic	Intergenic	26409	NM_001554	3491	Hs.8867	NM_001554	ENSG00000142871	CYR61	CCN1|GIG1|IGFBP10	cysteine-rich, angiogenic inducer, 61	protein-coding
chr1	724116	724285	Intergenic	(GAATG)n|Satellite|Satellite	-10132	NR_033908	100288069	Hs.527521	NR_033908		LOC100288069	-	general transcription factor IIi pseudogene	pseudo
chr1	30587212	30587381	Intergenic	Intergenic	-604323	NR_034182	100129196	Hs.659751	NR_034182		MATN1-AS1	-	MATN1 antisense RNA 1	miscRNA
chr1	28764614	28764783	promoter-TSS (NM_023923)	promoter-TSS (NM_023923)	37	NM_023923	65979	Hs.225641	NM_023923	ENSG00000204138	PHACTR4	-	phosphatase and actin regulator 4	protein-coding
chr1	202593942	202594111	intron (NM_177402, intron 1 of 8)	(TG)n|Simple_repeat|Simple_repeat	18555	NM_001136504	127833	Hs.25422	NM_001136504	ENSG00000143858	SYT2	SytII	synaptotagmin II	protein-coding
chr1	34471476	34471645	intron (NM_052896, intron 3 of 69)	MER117|DNA|hAT-Charlie	137003	NR_038372	402779	Hs.666207	NR_038372		LOC402779	-	uncharacterized LOC402779	miscRNA
chr1	76251931	76252100	promoter-TSS (NR_003042)	promoter-TSS (NR_003042)	129	NM_004582	5876	Hs.78948	NM_004582	ENSG00000137955	RABGGTB	GGTB	Rab geranylgeranyltransferase, beta subunit	protein-coding
chr1	235110919	235111088	Intergenic	Intergenic	180249	NR_002956	677802	Hs.533192	NR_002956		SNORA14B	ACA14b	small nucleolar RNA, H/ACA box 14B	snoRNA
chr1	145397804	145397973	Intergenic	tRNA-Gly-GGA|tRNA|tRNA	-15303	NM_213653	148738	Hs.632436	NM_145277	ENSG00000168509	HFE2	HFE2A|HJV|JH|RGMC	hemochromatosis type 2 (juvenile)	protein-coding
chr1	156901195	156901364	intron (NM_144702, intron 12 of 14)	L2c|LINE|L2	4757	NR_030527	768220		NR_030527		MIR765	MIRN765|hsa-mir-765	microRNA 765	miscRNA
chr1	46214931	46215100	intron (NM_005897, intron 1 of 8)	intron (NM_005897, intron 1 of 8)	1470	NM_001145349	3652	Hs.699548	NM_001145349	ENSG00000197429	IPP	KLHL27	intracisternal A particle-promoted polypeptide	protein-coding
chr1	114641820	114641989	intron (NM_001270805, intron 4 of 7)	intron (NM_001270805, intron 4 of 7)	53158	NM_205848	148281	Hs.736999	NM_001270805	ENSG00000134207	SYT6	sytVI	synaptotagmin VI	protein-coding
chr1	87689976	87690145	Intergenic	Intergenic	92451	NR_026985	339524	Hs.306423	NM_207357		LOC339524	-	uncharacterized LOC339524	miscRNA
chr1	16279367	16279536	intron (NM_003443, intron 2 of 15)	MLT1H|LTR|ERVL-MaLR	23176	NM_003443	7709	Hs.433764	NM_001242884	ENSG00000116809	ZBTB17	MIZ-1|ZNF151|ZNF60|pHZ-67	zinc finger and BTB domain containing 17	protein-coding
chr1	116087661	116087830	Intergenic	MLT1A|LTR|ERVL-MaLR	-96829	NM_001172411	81839	Hs.515130	NM_001172411	ENSG00000173218	VANGL1	KITENIN|LPP2|STB2|STBM2	vang-like 1 (van gogh, Drosophila)	protein-coding
chr1	145023143	145023312	intron (NM_022359, intron 1 of 6)	intron (NM_022359, intron 1 of 6)	16765	NM_001198832	9659	Hs.708687	NM_001002810	ENSG00000178104	PDE4DIP	CMYA2|MMGL	phosphodiesterase 4D interacting protein	protein-coding
chr1	20930743	20930912	intron (NM_001785, intron 1 of 3)	MLT1A0|LTR|ERVL-MaLR	15383	NM_001785	978	Hs.466910	NM_001785	ENSG00000158825	CDA	CDD	cytidine deaminase	protein-coding
chr1	205400402	205400571	Intergenic	Intergenic	-9272	NM_001199051	93273	Hs.733328	NM_001001552	ENSG00000186007	LEMD1	CT50|LEMP-1	LEM domain containing 1	protein-coding
chr1	43834553	43834722	promoter-TSS (NM_001256402)	promoter-TSS (NM_001256402)	-892	NM_001256402	64834	Hs.25597	NM_001256399	ENSG00000066322	ELOVL1	Ssc1	ELOVL fatty acid elongase 1	protein-coding
chr1	4756932	4757101	intron (NM_018836, intron 1 of 5)	(TG)n|Simple_repeat|Simple_repeat	41911	NM_018836	55966	Hs.25924	NM_001042478	ENSG00000196581	AJAP1	MOT8|RP3-426F10.1|SHREW-1|SHREW1	adherens junctions associated protein 1	protein-coding
chr1	15679007	15679176	intron (NM_052929, intron 18 of 30)	intron (NM_052929, intron 18 of 30)	-57300	NM_024329	79180	Hs.465374	NM_024329	ENSG00000142634	EFHD2	SWS1	EF-hand domain family, member D2	protein-coding
chr1	184129341	184129510	Intergenic	L2a|LINE|L2	108614	NR_023349	116461	Hs.548197	NM_001127394	ENSG00000198860	TSEN15	C1orf19|sen15	tRNA splicing endonuclease 15 homolog (S. cerevisiae)	protein-coding
chr1	198638307	198638476	intron (NM_001267798, intron 2 of 3)	intron (NM_001267798, intron 2 of 3)	30293	NM_002838	5788	Hs.654514	NM_001267798	ENSG00000081237	PTPRC	B220|CD45|CD45R|GP180|L-CA|LCA|LY5|T200	protein tyrosine phosphatase, receptor type, C	protein-coding
chr1	17029969	17030138	intron (NR_026567, intron 5 of 10)	(TG)n|Simple_repeat|Simple_repeat	16599	NR_026567	284729	Hs.548239	NR_026567		ESPNP	RP1-163M9.1|dJ1182A14.1	espin pseudogene	pseudo
chr1	13906672	13906841	Intergenic	LTR51|LTR|ERV1	-3496	NM_006474	10630	Hs.468675	NM_001006624	ENSG00000162493	PDPN	AGGRUS|GP36|GP40|Gp38|HT1A-1|OTS8|PA2.26|T1A|T1A-2	podoplanin	protein-coding
chr1	28969815	28969984	promoter-TSS (NM_001135218)	promoter-TSS (NM_001135218)	-295	NM_005644	6883	Hs.530251	NM_001135218	ENSG00000120656	TAF12	TAF2J|TAFII20	TAF12 RNA polymerase II, TATA box binding protein (TBP)-associated factor, 20kDa	protein-coding
chr1	17231603	17231772	Intergenic	Intergenic	-16758	NM_014675	9696	Hs.309403	NM_014675	ENSG00000058453	CROCC	ROLT	ciliary rootlet coiled-coil, rootletin	protein-coding
chr1	98552427	98552596	Intergenic	L2b|LINE|L2	-37262	NR_046105	400765	Hs.451802	NM_001001688		MIR137HG	-	MIR137 host gene (non-protein coding)	miscRNA
chr1	115722312	115722481	Intergenic	Intergenic	-90275	NM_005725	10100	Hs.310458	NM_005725	ENSG00000134198	TSPAN2	NET3|TSN2|TSPAN-2	tetraspanin 2	protein-coding
chr1	221130690	221130859	Intergenic	Intergenic	78031	NM_021958	3142	Hs.74870	NM_021958	ENSG00000136630	HLX	HB24|HLX1	H2.0-like homeobox	protein-coding
chr1	22345682	22345851	Intergenic	Intergenic	-5941	NR_023918	29092	Hs.279842	NR_023918		LINC00339	HSPC157|NCRNA00339	long intergenic non-protein coding RNA 339	miscRNA
chr1	10721768	10721937	intron (NM_017766, intron 5 of 15)	(CA)n|Simple_repeat|Simple_repeat	134881	NM_001079843	54897	Hs.439894	NM_001079843	ENSG00000130940	CASZ1	CAS11|CST|SRG|ZNF693|dJ734G22.1	castor zinc finger 1	protein-coding
chr1	20001681	20001850	intron (NM_000871, intron 1 of 2)	MIRb|SINE|MIR	9985	NM_000871	3362	Hs.22180	NM_000871	ENSG00000158748	HTR6	5-HT6|5-HT6R	5-hydroxytryptamine (serotonin) receptor 6, G protein-coupled	protein-coding
chr1	16891886	16892055	intron (NM_017940, intron 27 of 28)	intron (NM_017940, intron 27 of 28)	16561	NR_037446	100500876		NR_037446		MIR3675	-	microRNA 3675	miscRNA
chr1	77420035	77420204	intron (NM_030965, intron 2 of 4)	L1PA11|LINE|L1	86933	NM_030965	81849	Hs.303609	NM_030965	ENSG00000117069	ST6GALNAC5	SIAT7E|ST6GalNAcV	ST6 (alpha-N-acetyl-neuraminyl-2,3-beta-galactosyl-1,3)-N-acetylgalactosaminide alpha-2,6-sialyltransferase 5	protein-coding
chr1	31107695	31107864	Intergenic	(TG)n|Simple_repeat|Simple_repeat	-83840	NR_034182	100129196	Hs.659751	NR_034182		MATN1-AS1	-	MATN1 antisense RNA 1	miscRNA
chr1	145397767	145397936	Intergenic	Intergenic	-15340	NM_213653	148738	Hs.632436	NM_145277	ENSG00000168509	HFE2	HFE2A|HJV|JH|RGMC	hemochromatosis type 2 (juvenile)	protein-coding
chr1	13967435	13967604	Intergenic	L2b|LINE|L2	55552	NM_001006625	10630	Hs.468675	NM_001006624	ENSG00000162493	PDPN	AGGRUS|GP36|GP40|Gp38|HT1A-1|OTS8|PA2.26|T1A|T1A-2	podoplanin	protein-coding
chr1	86072733	86072902	Intergenic	Intergenic	26373	NM_001554	3491	Hs.8867	NM_001554	ENSG00000142871	CYR61	CCN1|GIG1|IGFBP10	cysteine-rich, angiogenic inducer, 61	protein-coding
chr1	59799479	59799648	intron (NM_001244714, intron 2 of 13)	intron (NM_001244714, intron 2 of 13)	23813	NM_001244714	55277	Hs.444301	NM_001113411	ENSG00000172456	FGGY	-	FGGY carbohydrate kinase domain containing	protein-coding
chr1	37702928	37703097	Intergenic	MIRb|SINE|MIR	75848	NR_036217	100422898		NR_036217		MIR4255	-	microRNA 4255	miscRNA
chr1	2187468	2187637	intron (NM_003036, intron 1 of 6)	intron (NM_003036, intron 1 of 6)	27418	NM_003036	6497	Hs.656507	NM_003036	ENSG00000157933	SKI	SKV	v-ski sarcoma viral oncogene homolog (avian)	protein-coding
chr1	32011325	32011494	Intergenic	(TCCA)n|Simple_repeat|Simple_repeat	27373	NR_027085	284551	Hs.658659	NR_027085		LOC284551	-	uncharacterized LOC284551	miscRNA
chr1	43432898	43433067	intron (NR_033967, intron 1 of 3)	intron (NR_033967, intron 1 of 3)	-8135	NM_006516	6513	Hs.473721	NM_006516	ENSG00000117394	SLC2A1	DYT17|DYT18|GLUT|GLUT1|GLUT1DS|PED	solute carrier family 2 (facilitated glucose transporter), member 1	protein-coding
chr1	144941433	144941602	intron (NM_001198832, intron 8 of 45)	intron (NM_001198832, intron 8 of 45)	-9485	NM_001002811	9659	Hs.708687	NM_001002810	ENSG00000178104	PDE4DIP	CMYA2|MMGL	phosphodiesterase 4D interacting protein	protein-coding
chr1	4204495	4204664	Intergenic	Intergenic	203907	NR_040065	728716	Hs.668359	NR_040065		LOC728716	-	uncharacterized LOC728716	miscRNA
chr1	117533236	117533405	TTS (NM_020440)	TTS (NM_020440)	-11052	NM_004258	9398	Hs.654598	NM_001256106	ENSG00000134256	CD101	IGSF2|V7	CD101 molecule	protein-coding
chr1	86044059	86044228	promoter-TSS (NM_001134445)	promoter-TSS (NM_001134445)	-97	NM_001134445	23576	Hs.731520	NM_001134445	ENSG00000153904	DDAH1	DDAH	dimethylarginine dimethylaminohydrolase 1	protein-coding
chr1	25226182	25226351	3' UTR (NM_004350, exon 5 of 5)	3' UTR (NM_004350, exon 5 of 5)	30504	NM_004350	864	Hs.170019	NM_001031680	ENSG00000020633	RUNX3	AML2|CBFA3|PEBP2aC	runt-related transcription factor 3	protein-coding
chr1	32010876	32011045	Intergenic	(TCCA)n|Simple_repeat|Simple_repeat	26924	NR_027085	284551	Hs.658659	NR_027085		LOC284551	-	uncharacterized LOC284551	miscRNA
chr1	53548433	53548602	intron (NM_001199082, intron 6 of 6)	(CATG)n|Simple_repeat|Simple_repeat	20632	NM_001199081	127435	Hs.740631	NM_001199080	ENSG00000174348	PODN	PCAN|SLRR5A	podocan	protein-coding
chr1	145399260	145399429	Intergenic	Intergenic	-13847	NM_213653	148738	Hs.632436	NM_145277	ENSG00000168509	HFE2	HFE2A|HJV|JH|RGMC	hemochromatosis type 2 (juvenile)	protein-coding
chr1	18200736	18200905	Intergenic	L3|LINE|CR1	119012	NM_030812	81569	Hs.2149	NM_030812	ENSG00000117148	ACTL8	CT57	actin-like 8	protein-coding
chr1	27753628	27753797	intron (NM_001201404, intron 2 of 7)	intron (NM_001201404, intron 2 of 7)	34560	NM_005281	2827	Hs.66542	NM_005281	ENSG00000181773	GPR3	ACCA	G protein-coupled receptor 3	protein-coding
chr1	22905832	22906001	intron (NM_001006943, intron 3 of 4)	(TATG)n|Simple_repeat|Simple_repeat	15912	NM_001006943	2046	Hs.283613	NM_001006943	ENSG00000070886	EPHA8	EEK|EK3|HEK3	EPH receptor A8	protein-coding
chr1	144993103	144993272	intron (NM_001002810, intron 1 of 3)	intron (NM_001002810, intron 1 of 3)	1835	NM_014644	9659	Hs.708687	NM_001002810	ENSG00000178104	PDE4DIP	CMYA2|MMGL	phosphodiesterase 4D interacting protein	protein-coding
chr1	161369434	161369603	Intergenic	CpG	-31854	NM_001013625	257177	Hs.534593	NM_001013625	ENSG00000188931	C1orf192	-	chromosome 1 open reading frame 192	protein-coding
chr1	205144635	205144804	intron (NM_015375, intron 2 of 12)	intron (NM_015375, intron 2 of 12)	36008	NM_015375	25778	Hs.6874	NM_015375	ENSG00000133059	DSTYK	DustyPK|RIP5|RIPK5	dual serine/threonine and tyrosine protein kinase	protein-coding
chr1	204392810	204392979	3' UTR (NM_002646, exon 34 of 34)	3' UTR (NM_002646, exon 34 of 34)	-11950	NM_032833	84919	Hs.304376	NM_032833	ENSG00000158615	PPP1R15B	CREP	protein phosphatase 1, regulatory subunit 15B	protein-coding
chr1	203884848	203885017	Intergenic	Intergenic	54192	NM_003094	6635	Hs.654418	NM_003094	ENSG00000182004	SNRPE	B-raf|SME|Sm-E	small nuclear ribonucleoprotein polypeptide E	protein-coding
chr1	236106928	236107097	Intergenic	(CA)n|Simple_repeat|Simple_repeat	-76792	NM_000081	1130	Hs.532411	NM_000081	ENSG00000143669	LYST	CHS|CHS1	lysosomal trafficking regulator	protein-coding
chr1	7540871	7541040	intron (NM_015215, intron 6 of 22)	L2b|LINE|L2	-290374	NM_004781	9341	Hs.66708	NM_004781	ENSG00000049245	VAMP3	CEB	vesicle-associated membrane protein 3 (cellubrevin)	protein-coding
chr1	26666686	26666855	intron (NM_001039775, intron 5 of 19)	MIRb|SINE|MIR	13851	NM_001039775	55057	Hs.128738	NM_017977	ENSG00000176092	AIM1L	CRYBG2	absent in melanoma 1-like	protein-coding
chr1	203955041	203955210	Intergenic	MSTD|LTR|ERVL-MaLR	55267	NR_027902	284573	Hs.406979	NR_027902		LINC00303	C1orf157|NCRNA00303	long intergenic non-protein coding RNA 303	miscRNA
chr1	42226903	42227072	intron (NM_024503, intron 1 of 8)	(TG)n|Simple_repeat|Simple_repeat	157391	NM_024503	59269	Hs.648369	NM_001127714	ENSG00000127124	HIVEP3	KBP-1|KBP1|KRC|SHN3|Schnurri-3|ZAS3|ZNF40C	human immunodeficiency virus type I enhancer binding protein 3	protein-coding
chr1	221611383	221611552	Intergenic	Tigger7|DNA|TcMar-Tigger	-101829	NR_024236	400804	Hs.722626	NR_024236		C1orf140	-	uncharacterized LOC400804	miscRNA
chr1	98594774	98594943	Intergenic	Intergenic	-79609	NR_046105	400765	Hs.451802	NM_001001688		MIR137HG	-	MIR137 host gene (non-protein coding)	miscRNA
chr1	205280173	205280342	intron (NM_030952, intron 2 of 6)	intron (NM_030952, intron 2 of 6)	10626	NM_030952	81788	Hs.497512	NM_030952	ENSG00000163545	NUAK2	SNARK	NUAK family, SNF1-like kinase, 2	protein-coding
chr1	27265247	27265416	intron (NM_006600, intron 2 of 8)	intron (NM_006600, intron 2 of 8)	17118	NM_006600	10726	Hs.263812	NM_006600	ENSG00000090273	NUDC	HNUDC|MNUDC|NPD011	nuclear distribution C homolog (A. nidulans)	protein-coding
chr1	243906261	243906430	intron (NM_001206729, intron 2 of 13)	MLT1J1|LTR|ERVL-MaLR	100239	NM_181690	10000	Hs.498292	NM_001206729	ENSG00000117020	AKT3	PKB-GAMMA|PKBG|PRKBG|RAC-PK-gamma|RAC-gamma|STK-2	v-akt murine thymoma viral oncogene homolog 3 (protein kinase B, gamma)	protein-coding
chr1	28450220	28450389	Intergenic	Intergenic	-35156	NM_001990	2140	Hs.185774	NM_001990	ENSG00000158161	EYA3	-	eyes absent homolog 3 (Drosophila)	protein-coding
chr1	25687856	25688025	TTS (NM_020485)	TTS (NM_020485)	23151	NM_014313	23585	Hs.705699	NM_014313	ENSG00000183726	TMEM50A	IFNRC|SMP1	transmembrane protein 50A	protein-coding
chr1	243962213	243962382	intron (NM_001206729, intron 2 of 13)	intron (NM_001206729, intron 2 of 13)	44287	NM_181690	10000	Hs.498292	NM_001206729	ENSG00000117020	AKT3	PKB-GAMMA|PKBG|PRKBG|RAC-PK-gamma|RAC-gamma|STK-2	v-akt murine thymoma viral oncogene homolog 3 (protein kinase B, gamma)	protein-coding
chr1	3190079	3190248	intron (NM_199454, intron 3 of 16)	(TG)n|Simple_repeat|Simple_repeat	145624	NR_036215	100422968		NR_036215		MIR4251	-	microRNA 4251	miscRNA
chr1	16279377	16279546	intron (NM_003443, intron 2 of 15)	MLT1H|LTR|ERVL-MaLR	23166	NM_003443	7709	Hs.433764	NM_001242884	ENSG00000116809	ZBTB17	MIZ-1|ZNF151|ZNF60|pHZ-67	zinc finger and BTB domain containing 17	protein-coding
chr1	201531943	201532112	Intergenic	Intergenic	42995	NR_026667	376693	Hs.605989	NR_026667		RPS10P7	RPS10_2_147	ribosomal protein S10 pseudogene 7	pseudo
chr1	16475830	16475999	intron (NM_004431, intron 2 of 16)	MIRb|SINE|MIR	6668	NM_004431	1969	Hs.171596	NM_004431	ENSG00000142627	EPHA2	ARCC2|CTPA|CTPP1|ECK	EPH receptor A2	protein-coding
chr1	110158686	110158855	Intergenic	Intergenic	-3065	NM_005272	2780	Hs.36973	NM_005272	ENSG00000134183	GNAT2	ACHM4|GNATC	guanine nucleotide binding protein (G protein), alpha transducing activity polypeptide 2	protein-coding
chr1	224075875	224076044	Intergenic	Intergenic	-42285	NM_005426	7159	Hs.523968	NM_001031685	ENSG00000143514	TP53BP2	53BP2|ASPP2|BBP|P53BP2|PPP1R13A	tumor protein p53 binding protein, 2	protein-coding
chr1	204421961	204422130	intron (NM_002646, intron 13 of 33)	AluJr|SINE|Alu	37429	NM_002646	5287	Hs.497487	NM_002646	ENSG00000133056	PIK3C2B	C2-PI3K	phosphatidylinositol-4-phosphate 3-kinase, catalytic subunit type 2 beta	protein-coding
chr1	86048305	86048474	intron (NM_001554, intron 4 of 4)	intron (NM_001554, intron 4 of 4)	1945	NM_001554	3491	Hs.8867	NM_001554	ENSG00000142871	CYR61	CCN1|GIG1|IGFBP10	cysteine-rich, angiogenic inducer, 61	protein-coding
chr1	8931021	8931190	5' UTR (NM_001201483, exon 1 of 9)	5' UTR (NM_001201483, exon 1 of 9)	530	NM_001201483	2023	Hs.517145	NM_001201483	ENSG00000074800	ENO1	ENO1L1|MPB1|NNE|PPH	enolase 1, (alpha)	protein-coding
chr1	224200547	224200716	Intergenic	(GAATG)n|Satellite|Satellite	-101158	NR_049764	23219	Hs.64691	NM_001136115	ENSG00000143756	FBXO28	CENP-30|Fbx28	F-box protein 28	protein-coding
chr1	204531003	204531172	Intergenic	L2c|LINE|L2	45580	NR_024171	4194	Hs.497492	NM_001204171	ENSG00000198625	MDM4	HDMX|MDMX|MRP1	Mdm4 p53 binding protein homolog (mouse)	protein-coding
chr1	58923206	58923375	Intergenic	Intergenic	89156	NM_145243	115209	Hs.425769	NM_145243	ENSG00000162600	OMA1	2010001O09Rik|DAB1|MPRP-1|YKR087C|ZMPOMA1	OMA1 zinc metallopeptidase homolog (S. cerevisiae)	protein-coding
chr1	115711436	115711605	Intergenic	Intergenic	-79399	NM_005725	10100	Hs.310458	NM_005725	ENSG00000134198	TSPAN2	NET3|TSN2|TSPAN-2	tetraspanin 2	protein-coding
chr1	64197259	64197428	Intergenic	Intergenic	-42347	NM_005012	4919	Hs.128753	NM_001083592	ENSG00000185483	ROR1	NTRKR1|dJ537F10.1	receptor tyrosine kinase-like orphan receptor 1	protein-coding
chr1	145113549	145113718	intron (NM_004892, intron 4 of 5)	AluSz6|SINE|Alu	17226	NM_004892	9554	Hs.715002	NM_004892		SEC22B	ERS-24|SEC22L1	SEC22 vesicle trafficking protein homolog B (S. cerevisiae) (gene/pseudogene)	protein-coding
chr1	233248820	233248989	intron (NM_014801, intron 21 of 33)	intron (NM_014801, intron 21 of 33)	162534	NM_032324	84284	Hs.642715	NM_032324	ENSG00000135778	NTPCR	C1orf57|HCR-NTPase|RP4-678E16.2	nucleoside-triphosphatase, cancer-related	protein-coding
chr1	208646568	208646737	Intergenic	L2c|LINE|L2	-228987	NM_025179	5362	Hs.497626	NM_025179	ENSG00000076356	PLXNA2	OCT|PLXN2	plexin A2	protein-coding
chr1	159836923	159837092	Intergenic	L2b|LINE|L2	-4560	NM_001013661	391123	Hs.647718	NM_001013661	ENSG00000243284	VSIG8	-	V-set and immunoglobulin domain containing 8	protein-coding
chr1	204164401	204164570	intron (NM_002256, intron 1 of 2)	(CA)n|Simple_repeat|Simple_repeat	1134	NM_002256	3814	Hs.95008	NM_002256	ENSG00000170498	KISS1	HH13|KiSS-1	KiSS-1 metastasis-suppressor	protein-coding
chr1	152995340	152995509	Intergenic	Intergenic	-8255	NM_003125	6699	Hs.1076	NM_003125	ENSG00000169469	SPRR1B	CORNIFIN|GADD33|SPRR1	small proline-rich protein 1B	protein-coding
chr1	109740043	109740212	exon (NM_020775, exon 16 of 22)	exon (NM_020775, exon 16 of 22)	9526	NM_001267049	57535	Hs.708190	NM_001267048	ENSG00000116299	KIAA1324	EIG121	KIAA1324	protein-coding
chr1	45172840	45173009	intron (NM_001145636, intron 6 of 11)	(TGAG)n|Simple_repeat|Simple_repeat	32530	NM_001145636	339541	Hs.173679	NM_001004307	ENSG00000198520	C1orf228	NCRNA00082|p40	chromosome 1 open reading frame 228	protein-coding
chr1	64814697	64814866	Intergenic	(TG)n|Simple_repeat|Simple_repeat	-121695	NM_020925	57685	Hs.443891	NM_020925	ENSG00000158966	CACHD1	RP4-655E10.1	cache domain containing 1	protein-coding
chr1	16840509	16840678	Intergenic	Intergenic	-21397	NR_023386	114819	Hs.597881	NR_023386		CROCCP3	CROCCL2|dJ798A10.2	ciliary rootlet coiled-coil, rootletin pseudogene 3	pseudo
chr1	44442206	44442375	exon (NM_001039457, exon 4 of 7)	exon (NM_001039457, exon 4 of 7)	1688	NM_001039457	533	Hs.596514	NM_001039457	ENSG00000117410	ATP6V0B	ATP6F|HATPL|VMA16	ATPase, H+ transporting, lysosomal 21kDa, V0 subunit b	protein-coding
chr1	244193426	244193595	intron (NR_033883, intron 8 of 11)	MIR3|SINE|MIR	-21051	NM_205768	10472	Hs.69997	NM_006352	ENSG00000179456	ZNF238	C2H2-171|RP58|TAZ-1|ZBTB18	zinc finger protein 238	protein-coding
chr1	27343111	27343280	Intergenic	Intergenic	-3862	NM_052943	115572	Hs.632378	NM_052943	ENSG00000158246	FAM46B	RP11-344H11.8	family with sequence similarity 46, member B	protein-coding
chr1	17048901	17049070	Intergenic	Intergenic	-2333	NR_026567	284729	Hs.548239	NR_026567		ESPNP	RP1-163M9.1|dJ1182A14.1	espin pseudogene	pseudo
chr1	16571102	16571271	Intergenic	MIRb|SINE|MIR	-7527	NM_030907	79363	Hs.546430	NM_030907	ENSG00000132881	RSG1	C1orf89	REM2 and RAB-like small GTPase 1	protein-coding
chr1	26392341	26392510	intron (NM_032588, intron 2 of 8)	intron (NM_032588, intron 2 of 8)	1700	NM_032588	84676	Hs.279709	NM_032588	ENSG00000158022	TRIM63	IRF|MURF1|MURF2|RNF28|SMRZ	tripartite motif containing 63, E3 ubiquitin protein ligase	protein-coding
chr1	148241438	148241607	Intergenic	U1|snRNA|snRNA	-38986	NM_001164261	645142	Hs.730589	NM_001164261	ENSG00000256374	PPIAL4D	-	peptidylprolyl isomerase A (cyclophilin A)-like 4D	protein-coding
chr1	157832236	157832405	Intergenic	MER91C|DNA|hAT-Tip100	-20686	NM_005894	922	Hs.134035	NM_005894	ENSG00000073754	CD5L	AIM|API6|PRO229|SP-ALPHA|Spalpha	CD5 molecule-like	protein-coding
chr1	224199666	224199835	Intergenic	(GAATG)n|Satellite|Satellite	-102039	NR_049764	23219	Hs.64691	NM_001136115	ENSG00000143756	FBXO28	CENP-30|Fbx28	F-box protein 28	protein-coding
chr1	203133843	203134012	intron (NM_000674, intron 3 of 3)	MIRc|SINE|MIR	11015	NM_004997	4608	Hs.927	NM_004997	ENSG00000133055	MYBPH	-	myosin binding protein H	protein-coding
chr1	161500129	161500298	Intergenic	tRNA-Leu-CTG|tRNA|tRNA	6177	NM_002155	3310	Hs.654614	NM_002155	ENSG00000173110	HSPA6	-	heat shock 70kDa protein 6 (HSP70B')	protein-coding
chr1	65603562	65603731	Intergenic	LTR16C|LTR|ERVL	-9586	NM_203464	205	Hs.10862	NM_001005353	ENSG00000162433	AK4	AK3|AK3L1|AK3L2	adenylate kinase 4	protein-coding
chr1	16840495	16840664	Intergenic	Intergenic	-21383	NR_023386	114819	Hs.597881	NR_023386		CROCCP3	CROCCL2|dJ798A10.2	ciliary rootlet coiled-coil, rootletin pseudogene 3	pseudo
chr1	32868470	32868639	Intergenic	Intergenic	-8492	NM_018045	55108	Hs.353454	NM_001143888	ENSG00000160058	BSDC1	-	BSD domain containing 1	protein-coding
chr1	159568132	159568301	Intergenic	Intergenic	10600	NM_001639	325	Hs.507080	NM_001639	ENSG00000132703	APCS	PTX2|SAP	amyloid P component, serum	protein-coding
chr1	77939531	77939700	intron (NM_174858, intron 8 of 13)	intron (NM_174858, intron 8 of 13)	191328	NM_012093	26289	Hs.597002	NM_012093	ENSG00000154027	AK5	AK6	adenylate kinase 5	protein-coding
chr1	24399292	24399461	intron (NM_152372, intron 23 of 36)	intron (NM_152372, intron 23 of 36)	39289	NM_152372	127294	Hs.523413	NM_152372	ENSG00000142661	MYOM3	RP11-293P20.1	myomesin family, member 3	protein-coding
chr1	149294632	149294801	Intergenic	tRNA-Gly-GGG|tRNA|tRNA	15240	NR_027002	388692	Hs.728022	NR_027002		LOC388692	-	uncharacterized LOC388692	miscRNA
chr1	153643711	153643880	promoter-TSS (NM_004515)	promoter-TSS (NM_004515)	-291	NM_004515	3608	Hs.75117	NM_001267809	ENSG00000143621	ILF2	NF45|PRO3063	interleukin enhancer binding factor 2, 45kDa	protein-coding
chr1	224200764	224200933	Intergenic	(GAATG)n|Satellite|Satellite	-100941	NR_049764	23219	Hs.64691	NM_001136115	ENSG00000143756	FBXO28	CENP-30|Fbx28	F-box protein 28	protein-coding
chr1	151988364	151988533	Intergenic	Intergenic	21063	NM_005620	6282	Hs.417004	NM_005620	ENSG00000163191	S100A11	MLN70|S100C	S100 calcium binding protein A11	protein-coding
chr1	11968615	11968784	Intergenic	MER1B|DNA|hAT-Charlie	17786	NM_138346	90231	Hs.520094	NM_138346	ENSG00000116685	KIAA2013	-	KIAA2013	protein-coding
chr1	145289840	145290009	Intergenic	MIR|SINE|MIR	-3447	NM_001039703	100132406	Hs.721588	NM_001039703	ENSG00000163386	NBPF10	AB6|AG1|NBPF9	neuroblastoma breakpoint family, member 10	protein-coding
chr1	30109639	30109808	Intergenic	MLT1E2|LTR|ERVL-MaLR	546695	NM_001195001	10076	Hs.19718	NM_001195001	ENSG00000060656	PTPRU	FMI|PCP-2|PTP|PTP-J|PTP-PI|PTP-RO|PTPPSI|PTPRO|PTPU2|R-PTP-PSI|R-PTP-U|hPTP-J	protein tyrosine phosphatase, receptor type, U	protein-coding
chr1	157389926	157390095	Intergenic	MLT1A0|LTR|ERVL-MaLR	132300	NM_031281	83416	Hs.415950	NM_001195388	ENSG00000143297	FCRL5	BXMAS1|CD307|CD307e|FCRH5|IRTA2|PRO820	Fc receptor-like 5	protein-coding
chr1	204333856	204334025	Intergenic	MER5A|DNA|hAT-Charlie	-4883	NM_014935	22874	Hs.253146	NM_138480	ENSG00000143850	PLEKHA6	PEPP-3|PEPP3	pleckstrin homology domain containing, family A member 6	protein-coding
chr1	28189746	28189915	Intergenic	Intergenic	-9225	NM_004848	9473	Hs.10649	NM_001039477	ENSG00000130775	THEMIS2	C1orf38|ICB-1	thymocyte selection associated family member 2	protein-coding
chr1	153643627	153643796	promoter-TSS (NM_004515)	promoter-TSS (NM_004515)	-207	NM_004515	3608	Hs.75117	NM_001267809	ENSG00000143621	ILF2	NF45|PRO3063	interleukin enhancer binding factor 2, 45kDa	protein-coding
chr1	16748802	16748971	intron (NM_198546, intron 3 of 12)	MIRb|SINE|MIR	15033	NM_198546	374955	Hs.705501	NM_198546	ENSG00000187144	SPATA21	spergen-2|spergen2	spermatogenesis associated 21	protein-coding
chr1	204164531	204164700	intron (NM_002256, intron 1 of 2)	(CA)n|Simple_repeat|Simple_repeat	1004	NM_002256	3814	Hs.95008	NM_002256	ENSG00000170498	KISS1	HH13|KiSS-1	KiSS-1 metastasis-suppressor	protein-coding
chr1	87837953	87838122	promoter-TSS (NR_038324)	promoter-TSS (NR_038324)	-699	NR_038324	100505768	Hs.125247	NR_038324		LOC100505768	-	uncharacterized LOC100505768	miscRNA
chr1	202742210	202742379	exon (NM_006618, exon 4 of 27)	exon (NM_006618, exon 4 of 27)	35255	NM_006618	10765	Hs.443650	NM_006618	ENSG00000117139	KDM5B	CT31|JARID1B|PLU-1|PLU1|PUT1|RBBP2H1A	lysine (K)-specific demethylase 5B	protein-coding
chr1	228122542	228122711	intron (NM_003395, intron 1 of 3)	intron (NM_003395, intron 1 of 3)	6758	NR_049806	100847072		NR_049806		MIR5008	-	microRNA 5008	miscRNA
chr1	202548493	202548662	intron (NM_032104, intron 12 of 12)	intron (NM_032104, intron 12 of 12)	39335	NM_001197131	4660	Hs.444403	NM_001167857	ENSG00000077157	PPP1R12B	MYPT2|PP1bp55	protein phosphatase 1, regulatory subunit 12B	protein-coding
chr1	205020164	205020333	intron (NM_005076, intron 1 of 22)	intron (NM_005076, intron 1 of 22)	7908	NM_005076	6900	Hs.519220	NM_005076	ENSG00000184144	CNTN2	AXT|TAG-1|TAX|TAX1	contactin 2 (axonal)	protein-coding
chr1	42191140	42191309	intron (NM_024503, intron 1 of 8)	intron (NM_024503, intron 1 of 8)	193154	NM_024503	59269	Hs.648369	NM_001127714	ENSG00000127124	HIVEP3	KBP-1|KBP1|KRC|SHN3|Schnurri-3|ZAS3|ZNF40C	human immunodeficiency virus type I enhancer binding protein 3	protein-coding
chr1	151271196	151271365	intron (NM_002651, intron 10 of 12)	intron (NM_002651, intron 10 of 12)	16489	NM_020832	57592	Hs.186756	NM_020832	ENSG00000143373	ZNF687	-	zinc finger protein 687	protein-coding
chr1	115801002	115801171	Intergenic	LTR8A|LTR|ERV1	79771	NM_002506	4803	Hs.2561	NM_002506	ENSG00000134259	NGF	Beta-NGF|HSAN5|NGFB	nerve growth factor (beta polypeptide)	protein-coding
chr1	25340235	25340404	Intergenic	MIRc|SINE|MIR	-48818	NM_001031680	864	Hs.170019	NM_001031680	ENSG00000020633	RUNX3	AML2|CBFA3|PEBP2aC	runt-related transcription factor 3	protein-coding
chr1	2187511	2187680	intron (NM_003036, intron 1 of 6)	intron (NM_003036, intron 1 of 6)	27461	NM_003036	6497	Hs.656507	NM_003036	ENSG00000157933	SKI	SKV	v-ski sarcoma viral oncogene homolog (avian)	protein-coding
chr1	32450480	32450649	Intergenic	L2b|LINE|L2	-28927	NM_006559	10657	Hs.445893	NM_006559	ENSG00000121774	KHDRBS1	Sam68|p62|p68	KH domain containing, RNA binding, signal transduction associated 1	protein-coding
chr1	37280561	37280730	intron (NM_000831, intron 13 of 15)	intron (NM_000831, intron 13 of 15)	219199	NM_000831	2899	Hs.128848	NM_000831	ENSG00000163873	GRIK3	EAA5|GLR7|GLUR7|GluK3|GluR7a	glutamate receptor, ionotropic, kainate 3	protein-coding
chr1	40480996	40481165	Intergenic	Intergenic	-25175	NM_001105530	10487	Hs.713078	NM_001105530	ENSG00000131236	CAP1	CAP|CAP1-PEN	CAP, adenylate cyclase-associated protein 1 (yeast)	protein-coding
chr1	204087787	204087956	intron (NM_005686, intron 7 of 13)	intron (NM_005686, intron 7 of 13)	33436	NM_018208	55224	Hs.497469	NM_018208	ENSG00000143845	ETNK2	EKI2|HMFT1716	ethanolamine kinase 2	protein-coding
chr1	85794764	85794933	intron (NM_012137, intron 4 of 5)	intron (NM_012137, intron 4 of 5)	-52261	NM_003921	8915	Hs.193516	NM_003921	ENSG00000142867	BCL10	CARMEN|CIPER|CLAP|c-E10|mE10	B-cell CLL/lymphoma 10	protein-coding
chr1	24528436	24528605	intron (NR_027087, intron 1 of 2)	intron (NR_027087, intron 1 of 2)	1790	NR_027087	284632	Hs.638906	NR_027087		LOC284632	-	uncharacterized LOC284632	miscRNA
chr1	207186061	207186230	Intergenic	L2b|LINE|L2	19956	NM_023938	79098	Hs.32417	NM_001083924	ENSG00000182795	C1orf116	SARG	chromosome 1 open reading frame 116	protein-coding
chr1	87675075	87675244	Intergenic	Intergenic	77550	NR_026985	339524	Hs.306423	NM_207357		LOC339524	-	uncharacterized LOC339524	miscRNA
chr1	87718230	87718399	Intergenic	Intergenic	-75837	NM_006769	8543	Hs.436792	NM_006769	ENSG00000143013	LMO4	-	LIM domain only 4	protein-coding
chr1	24197087	24197256	Intergenic	MIR3|SINE|MIR	-2312	NM_000147	2517	Hs.370858	NM_000147	ENSG00000179163	FUCA1	FUCA	fucosidase, alpha-L- 1, tissue	protein-coding
chr1	161582440	161582609	Intergenic	tRNA-Gly-GGA|tRNA|tRNA	6675	NR_024151	3311	Hs.662180	NR_024151		HSPA7	HSP70B	heat shock 70kDa protein 7 (HSP70B)	pseudo
chr1	154277604	154277773	Intergenic	ERV3-16A3_I-int|LTR|ERVL	-15904	NM_080429	89872	Hs.259048	NM_080429	ENSG00000143595	AQP10	AQPA_HUMAN	aquaporin 10	protein-coding
chr1	16966006	16966175	Intergenic	Intergenic	-5979	NR_027504	11209	Hs.349110	NR_027504		MST1P2	MSPL-1|MSPL-2|MSPL-3|MSPL1|MSPL2|MSPL3|MSTP1|MSTP2|MSTP3	macrophage stimulating 1 (hepatocyte growth factor-like) pseudogene 2	pseudo
chr1	44821749	44821918	promoter-TSS (NM_024066)	promoter-TSS (NM_024066)	-894	NM_024066	79033	Hs.731413	NM_024066	ENSG00000117419	ERI3	PINT1|PRNPIP	ERI1 exoribonuclease family member 3	protein-coding
chr1	8009097	8009266	Intergenic	Intergenic	-5956	NM_001561	3604	Hs.738942	NM_001561	ENSG00000049249	TNFRSF9	4-1BB|CD137|CDw137|ILA	tumor necrosis factor receptor superfamily, member 9	protein-coding
chr1	145028741	145028910	intron (NM_022359, intron 1 of 6)	intron (NM_022359, intron 1 of 6)	11167	NM_001198832	9659	Hs.708687	NM_001002810	ENSG00000178104	PDE4DIP	CMYA2|MMGL	phosphodiesterase 4D interacting protein	protein-coding
chr1	59602173	59602342	intron (NR_027120, intron 1 of 2)	intron (NR_027120, intron 1 of 2)	10222	NR_027120	729467	Hs.662291	NR_027120		HSD52	-	uncharacterized LOC729467	miscRNA
chr1	28832480	28832649	non-coding (NR_002909, exon 1 of 3)	non-coding (NR_002909, exon 1 of 3)	109	NR_036473	8420	Hs.469723	NR_002909	ENSG00000242125	SNHG3	NCRNA00014|RNU17C|RNU17D|U17HG|U17HG-A|U17HG-AB	small nucleolar RNA host gene 3 (non-protein coding)	miscRNA
chr1	65725556	65725725	Intergenic	MIRb|SINE|MIR	-4737	NM_001256865	9829	Hs.647643	NM_001256864	ENSG00000116675	DNAJC6	DJC6	DnaJ (Hsp40) homolog, subfamily C, member 6	protein-coding
chr1	221612810	221612979	Intergenic	Intergenic	-103256	NR_024236	400804	Hs.722626	NR_024236		C1orf140	-	uncharacterized LOC400804	miscRNA
chr1	46640747	46640916	promoter-TSS (NM_005727)	promoter-TSS (NM_005727)	82	NM_005727	10103	Hs.38972	NM_005727	ENSG00000117472	TSPAN1	NET1|TM4C|TM4SF	tetraspanin 1	protein-coding
chr1	198412585	198412754	Intergenic	Intergenic	97406	NM_133262	127124	Hs.127743	NM_133262	ENSG00000151418	ATP6V1G3	ATP6G3|Vma10	ATPase, H+ transporting, lysosomal 13kDa, V1 subunit G3	protein-coding
chr1	215164089	215164258	Intergenic	L2a|LINE|L2	-14712	NM_001017424	3776	Hs.497745	NM_001017424	ENSG00000082482	KCNK2	K2p2.1|TPKC1|TREK|TREK-1|TREK1|hTREK-1c|hTREK-1e	potassium channel, subfamily K, member 2	protein-coding
chr1	96828236	96828405	Intergenic	L2a|LINE|L2	-358855	NM_021190	58155	Hs.596061	NM_021190	ENSG00000117569	PTBP2	PTB|PTBLP|brPTB|nPTB|nPTB5|nPTB6|nPTB7|nPTB8	polypyrimidine tract binding protein 2	protein-coding
chr1	17494335	17494504	Intergenic	MIR|SINE|MIR	-37202	NM_013358	29943	Hs.412941	NM_013358	ENSG00000142623	PADI1	HPAD10|PAD1|PDI|PDI1	peptidyl arginine deiminase, type I	protein-coding
chr1	203632509	203632678	intron (NM_001001396, intron 1 of 21)	intron (NM_001001396, intron 1 of 21)	36678	NM_001684	493	Hs.733333	NM_001001396	ENSG00000058668	ATP2B4	ATP2B2|MXRA1|PMCA4|PMCA4b|PMCA4x	ATPase, Ca++ transporting, plasma membrane 4	protein-coding
chr1	207326328	207326497	Intergenic	Intergenic	48805	NM_000715	722	Hs.1012	NM_000715	ENSG00000123838	C4BPA	C4BP|PRP	complement component 4 binding protein, alpha	protein-coding
chr1	23890579	23890748	Intergenic	MIRb|SINE|MIR	-4378	NM_002167	3399	Hs.76884	NM_002167	ENSG00000117318	ID3	HEIR-1|bHLHb25	inhibitor of DNA binding 3, dominant negative helix-loop-helix protein	protein-coding
chr1	28836339	28836508	non-coding (NR_002909, exon 3 of 3)	non-coding (NR_002909, exon 3 of 3)	3968	NR_036473	8420	Hs.469723	NR_002909	ENSG00000242125	SNHG3	NCRNA00014|RNU17C|RNU17D|U17HG|U17HG-A|U17HG-AB	small nucleolar RNA host gene 3 (non-protein coding)	miscRNA
chr1	101830665	101830834	Intergenic	Intergenic	-24298	NR_046482	100873740		NR_046482		RNU6-6	-	RNA, U6 small nuclear 6	snRNA
chr1	233318375	233318544	intron (NM_014801, intron 15 of 33)	L2c|LINE|L2	113000	NM_014801	80003	Hs.370605	NM_014801	ENSG00000135749	PCNXL2	-	pecanex-like 2 (Drosophila)	protein-coding
chr1	41341436	41341605	Intergenic	Intergenic	-13502	NM_133467	163732	Hs.355820	NM_133467	ENSG00000179862	CITED4	-	Cbp/p300-interacting transactivator, with Glu/Asp-rich carboxy-terminal domain, 4	protein-coding
chr1	186157439	186157608	intron (NM_031935, intron 106 of 106)	intron (NM_031935, intron 106 of 106)	-107882	NM_001127709	10216	Hs.647723	NM_001127708	ENSG00000116690	PRG4	CACP|HAPO|JCAP|MSF|SZP|bG174L6.2	proteoglycan 4	protein-coding
chr1	222161338	222161507	Intergenic	Intergenic	-245906	NM_144729	11221	Hs.732301	NM_007207	ENSG00000143507	DUSP10	MKP-5|MKP5	dual specificity phosphatase 10	protein-coding
chr1	4413612	4413781	Intergenic	(TG)n|Simple_repeat|Simple_repeat	-58415	NR_027088	284661	Hs.278112	NR_027088		LOC284661	-	uncharacterized LOC284661	miscRNA
chr1	8931090	8931259	5' UTR (NM_001201483, exon 1 of 9)	5' UTR (NM_001201483, exon 1 of 9)	461	NM_001201483	2023	Hs.517145	NM_001201483	ENSG00000074800	ENO1	ENO1L1|MPB1|NNE|PPH	enolase 1, (alpha)	protein-coding
chr1	84831439	84831608	intron (NR_003927, intron 7 of 8)	Tigger15a|DNA|TcMar-Tigger	32053	NR_003927	391051	Hs.647646	NR_003927		UOX	UOXP|URICASE	urate oxidase, pseudogene	pseudo
chr1	37079071	37079240	Intergenic	Intergenic	-130240	NM_156039	1441	Hs.524517	NM_000760	ENSG00000119535	CSF3R	CD114|GCSFR	colony stimulating factor 3 receptor (granulocyte)	protein-coding
chr1	112441659	112441828	intron (NM_004980, intron 2 of 7)	intron (NM_004980, intron 2 of 7)	90034	NM_172198	3752	Hs.666367	NM_004980	ENSG00000171385	KCND3	KCND3L|KCND3S|KSHIVB|KV4.3	potassium voltage-gated channel, Shal-related subfamily, member 3	protein-coding
chr1	206954830	206954999	Intergenic	Intergenic	-9075	NM_000572	3586	Hs.193717	NM_000572	ENSG00000136634	IL10	CSIF|GVHDS|IL-10|IL10A|TGIF	interleukin 10	protein-coding
chr1	119753660	119753829	Intergenic	MLT1N2|LTR|ERVL-MaLR	-70449	NM_015836	10352	Hs.523506	NM_015836	ENSG00000116874	WARS2	TrpRS	tryptophanyl tRNA synthetase 2, mitochondrial	protein-coding
chr1	4204487	4204656	Intergenic	Intergenic	203899	NR_040065	728716	Hs.668359	NR_040065		LOC728716	-	uncharacterized LOC728716	miscRNA
chr1	9537685	9537854	Intergenic	(CA)n|Simple_repeat|Simple_repeat	-61759	NM_032315	84275	Hs.568613	NM_032315	ENSG00000171612	SLC25A33	BMSC-MCP|PNC1	solute carrier family 25 (pyrimidine nucleotide carrier), member 33	protein-coding
chr1	144529985	144530154	Intergenic	AluJb|SINE|Alu	-8100	NR_024584	728875	Hs.662922	NR_024584		LOC728875	-	uncharacterized LOC728875	miscRNA
chr1	204476151	204476320	Intergenic	Intergenic	-9272	NM_001204172	4194	Hs.497492	NM_001204171	ENSG00000198625	MDM4	HDMX|MDMX|MRP1	Mdm4 p53 binding protein homolog (mouse)	protein-coding
chr1	167684710	167684879	Intergenic	tRNA-Pro-CCY|tRNA|tRNA	-6393	NM_024569	9019	Hs.493919	NM_001146191	ENSG00000197965	MPZL1	MPZL1b|PZR|PZR1b|PZRa|PZRb	myelin protein zero-like 1	protein-coding
chr1	32701883	32702052	intron (NR_026850, intron 3 of 6)	MER44D|DNA|TcMar-Tigger	5344	NR_026850	339483	Hs.471067	NR_026850		MTMR9LP	MTMR9L	myotubularin related protein 9-like, pseudogene	pseudo
chr1	54022549	54022718	intron (NM_147193, intron 3 of 9)	(TG)n|Simple_repeat|Simple_repeat	97561	NM_033067	63948	Hs.131654	NM_033067	ENSG00000143006	DMRTB1	-	DMRT-like family B with proline-rich C-terminal, 1	protein-coding
chr1	144891840	144892009	3' UTR (NM_001002812, exon 23 of 23)	3' UTR (NM_001002812, exon 23 of 23)	40108	NM_001002811	9659	Hs.708687	NM_001002810	ENSG00000178104	PDE4DIP	CMYA2|MMGL	phosphodiesterase 4D interacting protein	protein-coding
chr1	145395528	145395697	Intergenic	Intergenic	-17579	NM_213653	148738	Hs.632436	NM_145277	ENSG00000168509	HFE2	HFE2A|HJV|JH|RGMC	hemochromatosis type 2 (juvenile)	protein-coding
chr1	205267738	205267907	Intergenic	Intergenic	23061	NM_030952	81788	Hs.497512	NM_030952	ENSG00000163545	NUAK2	SNARK	NUAK family, SNF1-like kinase, 2	protein-coding
chr1	40298165	40298334	Intergenic	Intergenic	-43716	NM_001720	656	Hs.734367	NM_001720	ENSG00000116985	BMP8B	BMP8|OP2	bone morphogenetic protein 8b	protein-coding
chr1	54108227	54108396	intron (NM_147193, intron 1 of 9)	L2a|LINE|L2	91566	NM_147193	148979	Hs.306691	NM_147193	ENSG00000174332	GLIS1	-	GLIS family zinc finger 1	protein-coding
chr1	206656540	206656709	intron (NM_001193322, intron 13 of 20)	MIRc|SINE|MIR	13038	NM_001193322	9641	Hs.321045	NM_001193321	ENSG00000143466	IKBKE	IKK-E|IKK-i|IKKE|IKKI	inhibitor of kappa light polypeptide gene enhancer in B-cells, kinase epsilon	protein-coding
chr1	55807046	55807215	Intergenic	MLT1H2|LTR|ERVL-MaLR	115816	NR_039618	100616272		NR_039618		MIR4422	-	microRNA 4422	miscRNA
chr1	5732663	5732832	Intergenic	Intergenic	108616	NR_039612	100616489		NR_039612		MIR4417	-	microRNA 4417	miscRNA
chr1	161500833	161501002	Intergenic	tRNA-Gly-GGA|tRNA|tRNA	6881	NM_002155	3310	Hs.654614	NM_002155	ENSG00000173110	HSPA6	-	heat shock 70kDa protein 6 (HSP70B')	protein-coding
chr1	203461825	203461994	Intergenic	MIR3|SINE|MIR	-1362	NM_014359	26254	Hs.632468	NM_014359	ENSG00000188770	OPTC	OPT	opticin	protein-coding
chr1	145055233	145055402	intron (NM_022359, intron 1 of 6)	intron (NM_022359, intron 1 of 6)	-15325	NM_001198832	9659	Hs.708687	NM_001002810	ENSG00000178104	PDE4DIP	CMYA2|MMGL	phosphodiesterase 4D interacting protein	protein-coding
chr1	120630655	120630824	Intergenic	Charlie10|DNA|hAT-Charlie	-18422	NM_024408	4853	Hs.487360	NM_001200001	ENSG00000134250	NOTCH2	AGS2|HJCYS|hN2	notch 2	protein-coding
chr1	28519811	28519980	intron (NM_001164721, intron 1 of 2)	intron (NM_001164721, intron 1 of 2)	552	NM_001164721	5724	Hs.77542	NM_000952	ENSG00000169403	PTAFR	PAFR	platelet-activating factor receptor	protein-coding
chr1	215130760	215130929	Intergenic	Intergenic	-48041	NM_001017424	3776	Hs.497745	NM_001017424	ENSG00000082482	KCNK2	K2p2.1|TPKC1|TREK|TREK-1|TREK1|hTREK-1c|hTREK-1e	potassium channel, subfamily K, member 2	protein-coding
chr1	144012775	144012944	intron (NR_034178, intron 1 of 3)	intron (NR_034178, intron 1 of 3)	97111	NR_034178	647135	Hs.191475	NR_034178		SRGAP2B	SRGAP2L|SRGAP2P2	SLIT-ROBO Rho GTPase activating protein 2B (pseudogene)	pseudo
chr1	11762318	11762487	intron (NM_198545, intron 1 of 6)	(CA)n|Simple_repeat|Simple_repeat	10621	NM_198545	374946	Hs.733197	NM_198545	ENSG00000162490	DRAXIN	AGPA3119|C1orf187|UNQ3119|neucrin	dorsal inhibitory axon guidance protein	protein-coding
chr1	11779295	11779464	intron (NM_198545, intron 6 of 6)	L1MC2|LINE|L1	-16763	NM_001040196	57085	Hs.464438	NM_001040194	ENSG00000177674	AGTRAP	ATRAP	angiotensin II receptor-associated protein	protein-coding
chr1	7163437	7163606	intron (NM_015215, intron 4 of 22)	(CA)n|Simple_repeat|Simple_repeat	318137	NR_038934	23261	Hs.671020	NM_001195563	ENSG00000171735	CAMTA1	CANPMR	calmodulin binding transcription activator 1	protein-coding
chr1	203665921	203666090	intron (NM_001001396, intron 2 of 21)	(TG)n|Simple_repeat|Simple_repeat	-32704	NR_003019	677843	Hs.676135	NR_003019		SNORA77	ACA63	small nucleolar RNA, H/ACA box 77	snoRNA
chr1	202173610	202173779	intron (NM_021636, intron 1 of 17)	(CA)n|Simple_repeat|Simple_repeat	789	NM_021636	59352	Hs.497402	NM_001017403	ENSG00000133067	LGR6	GPCR|VTS20631	leucine-rich repeat containing G protein-coupled receptor 6	protein-coding
chr1	215130788	215130957	Intergenic	Intergenic	-48013	NM_001017424	3776	Hs.497745	NM_001017424	ENSG00000082482	KCNK2	K2p2.1|TPKC1|TREK|TREK-1|TREK1|hTREK-1c|hTREK-1e	potassium channel, subfamily K, member 2	protein-coding
chr1	68435839	68436008	intron (NR_040077, intron 1 of 9)	L1MA3|LINE|L1	80537	NM_004675	9077	Hs.194695	NM_004675	ENSG00000162595	DIRAS3	ARHI|NOEY2	DIRAS family, GTP-binding RAS-like 3	protein-coding
chr1	234622726	234622895	Intergenic	Intergenic	-7961	NM_005646	6894	Hs.498115	NM_005646	ENSG00000059588	TARBP1	TRM3|TRP-185|TRP185	TAR (HIV-1) RNA binding protein 1	protein-coding
chr1	20223942	20224111	intron (NM_015207, intron 3 of 7)	intron (NM_015207, intron 3 of 7)	15138	NM_015207	23252	Hs.374987	NM_015207	ENSG00000169914	OTUD3	DUBA4|RP11-460G22.1	OTU domain containing 3	protein-coding
chr1	204477116	204477285	Intergenic	Intergenic	-8307	NM_001204172	4194	Hs.497492	NM_001204171	ENSG00000198625	MDM4	HDMX|MDMX|MRP1	Mdm4 p53 binding protein homolog (mouse)	protein-coding
chr1	59483578	59483747	Intergenic	Intergenic	128817	NR_027120	729467	Hs.662291	NR_027120		HSD52	-	uncharacterized LOC729467	miscRNA
chr1	204535017	204535186	Intergenic	Intergenic	49594	NR_024171	4194	Hs.497492	NM_001204171	ENSG00000198625	MDM4	HDMX|MDMX|MRP1	Mdm4 p53 binding protein homolog (mouse)	protein-coding
chr1	17231598	17231767	Intergenic	Intergenic	-16763	NM_014675	9696	Hs.309403	NM_014675	ENSG00000058453	CROCC	ROLT	ciliary rootlet coiled-coil, rootletin	protein-coding
chr1	234912591	234912760	Intergenic	Intergenic	52886	NR_038856	100506810	Hs.586634	NR_038856		LOC100506810	-	uncharacterized LOC100506810	miscRNA
chr1	26666679	26666848	intron (NM_001039775, intron 5 of 19)	MIRb|SINE|MIR	13858	NM_001039775	55057	Hs.128738	NM_017977	ENSG00000176092	AIM1L	CRYBG2	absent in melanoma 1-like	protein-coding
chr1	34531558	34531727	intron (NM_052896, intron 2 of 69)	MIR|SINE|MIR	99801	NM_052896	114784	Hs.656915	NM_052896	ENSG00000121904	CSMD2	dJ1007G16.1|dJ1007G16.2|dJ947L8.1	CUB and Sushi multiple domains 2	protein-coding
chr1	16887169	16887338	Intergenic	MLT2B4|LTR|ERVL	11844	NR_037446	100500876		NR_037446		MIR3675	-	microRNA 3675	miscRNA
chr1	15441925	15442094	non-coding (NR_027136, exon 5 of 5)	non-coding (NR_027136, exon 5 of 5)	36951	NR_027136	200197	Hs.531424	NM_182534		C1orf126	RP1-21O18.2	chromosome 1 open reading frame 126	miscRNA
chr1	145395511	145395680	Intergenic	Intergenic	-17596	NM_213653	148738	Hs.632436	NM_145277	ENSG00000168509	HFE2	HFE2A|HJV|JH|RGMC	hemochromatosis type 2 (juvenile)	protein-coding
chr1	145457347	145457516	intron (NM_032305, intron 5 of 7)	intron (NM_032305, intron 5 of 7)	12956	NM_032305	84265	Hs.591456	NM_032305	ENSG00000121851	POLR3GL	RPC32HOM|flj32422	polymerase (RNA) III (DNA directed) polypeptide G (32kD)-like	protein-coding
chr1	24838404	24838573	intron (NM_001251978, intron 1 of 4)	intron (NM_001251978, intron 1 of 4)	-2316	NM_001251985	11123	Hs.737226	NM_001251977	ENSG00000117602	RCAN3	DSCR1L2|MCIP3|RCN3|hRCN3	RCAN family member 3	protein-coding
chr1	25043668	25043837	Intergenic	L2b|LINE|L2	-28008	NM_013943	25932	Hs.595507	NM_013943	ENSG00000169504	CLIC4	CLIC4L|H1|MTCLIC|huH1|p64H1	chloride intracellular channel 4	protein-coding
chr1	55322772	55322941	intron (NM_014762, intron 6 of 8)	intron (NM_014762, intron 6 of 8)	30065	NM_014762	1718	Hs.498727	NM_014762	ENSG00000116133	DHCR24	DCE|Nbla03646|SELADIN1|seladin-1	24-dehydrocholesterol reductase	protein-coding
chr1	203090158	203090327	Intergenic	Intergenic	-6594	NM_000674	134	Hs.77867	NM_000674	ENSG00000163485	ADORA1	RDC7	adenosine A1 receptor	protein-coding
chr1	231276207	231276376	Intergenic	Intergenic	-22383	NM_001004342	440730	Hs.655089	NM_001004342	ENSG00000119283	TRIM67	TNL	tripartite motif containing 67	protein-coding
chr1	68435838	68436007	intron (NR_040077, intron 1 of 9)	L1MA3|LINE|L1	80538	NM_004675	9077	Hs.194695	NM_004675	ENSG00000162595	DIRAS3	ARHI|NOEY2	DIRAS family, GTP-binding RAS-like 3	protein-coding
chr1	28975105	28975274	promoter-TSS (NR_004407)	promoter-TSS (NR_004407)	77	NR_004407	26824	Hs.640266	NR_004407		RNU11	U11	RNA, U11 small nuclear	snRNA
chr1	6606352	6606521	intron (NM_024654, intron 3 of 11)	intron (NM_024654, intron 3 of 11)	8222	NM_024654	79707	Hs.59425	NM_024654	ENSG00000162408	NOL9	Grc3|NET6	nucleolar protein 9	protein-coding
chr1	215546853	215547022	Intergenic	MLT1C|LTR|ERVL-MaLR	-193798	NM_016121	51133	Hs.335139	NM_016121	ENSG00000136636	KCTD3	NY-REN-45	potassium channel tetramerisation domain containing 3	protein-coding
chr1	249168360	249168529	Intergenic	Intergenic	-15129	NM_001193328	55657	Hs.377705	NM_001136036	ENSG00000171163	ZNF692	AREBP|Zfp692	zinc finger protein 692	protein-coding
chr1	55244065	55244234	Intergenic	L2c|LINE|L2	-13923	NM_152268	25973	Hs.380169	NM_152268	ENSG00000162396	PARS2	MT-PRORS	prolyl-tRNA synthetase 2, mitochondrial (putative)	protein-coding
chr1	144991873	144992042	intron (NM_001002810, intron 1 of 3)	intron (NM_001002810, intron 1 of 3)	3065	NM_014644	9659	Hs.708687	NM_001002810	ENSG00000178104	PDE4DIP	CMYA2|MMGL	phosphodiesterase 4D interacting protein	protein-coding
chr1	11762268	11762437	intron (NM_198545, intron 1 of 6)	(CA)n|Simple_repeat|Simple_repeat	10571	NM_198545	374946	Hs.733197	NM_198545	ENSG00000162490	DRAXIN	AGPA3119|C1orf187|UNQ3119|neucrin	dorsal inhibitory axon guidance protein	protein-coding
chr1	218670043	218670212	Intergenic	Intergenic	-151107	NR_046268	728463	Hs.568469	NR_046268		LOC728463	-	uncharacterized LOC728463	miscRNA
chr1	26384159	26384328	intron (NM_032588, intron 5 of 8)	intron (NM_032588, intron 5 of 8)	9882	NM_032588	84676	Hs.279709	NM_032588	ENSG00000158022	TRIM63	IRF|MURF1|MURF2|RNF28|SMRZ	tripartite motif containing 63, E3 ubiquitin protein ligase	protein-coding
chr1	78758167	78758336	intron (NR_027310, intron 3 of 5)	MLT1I|LTR|ERVL-MaLR	62968	NR_027310	149047	Hs.352665	NM_144700		MGC27382	-	uncharacterized MGC27382	miscRNA
chr1	48057565	48057734	Intergenic	(TG)n|Simple_repeat|Simple_repeat	155960	NM_004474	2306	Hs.166188	NM_004474	ENSG00000186564	FOXD2	FKHL17|FREAC-9|FREAC9	forkhead box D2	protein-coding
chr1	145291996	145292165	Intergenic	Intergenic	-1291	NM_001039703	100132406	Hs.721588	NM_001039703	ENSG00000163386	NBPF10	AB6|AG1|NBPF9	neuroblastoma breakpoint family, member 10	protein-coding
chr1	17522790	17522959	Intergenic	MIRb|SINE|MIR	-8747	NM_013358	29943	Hs.412941	NM_013358	ENSG00000142623	PADI1	HPAD10|PAD1|PDI|PDI1	peptidyl arginine deiminase, type I	protein-coding
chr1	236184050	236184219	intron (NM_002508, intron 9 of 19)	intron (NM_002508, intron 9 of 19)	44347	NM_002508	4811	Hs.356624	NM_002508	ENSG00000116962	NID1	NID	nidogen 1	protein-coding
chr1	201872703	201872872	intron (NM_012134, intron 1 of 2)	intron (NM_012134, intron 1 of 2)	14982	NM_198149	149345	Hs.632471	NM_198149	ENSG00000198892	SHISA4	C1orf40|TMEM58	shisa homolog 4 (Xenopus laevis)	protein-coding
chr1	247921521	247921690	exon (NM_012353, exon 1 of 1)	exon (NM_012353, exon 1 of 1)	103	NM_012353	26188	Hs.381306	NM_012353	ENSG00000221888	OR1C1	HSTPCR27|OR1-42|OR1.5.10|ORL211|TPCR27	olfactory receptor, family 1, subfamily C, member 1	protein-coding
chr1	110350706	110350875	Intergenic	Intergenic	-44146	NM_024526	79574	Hs.485352	NM_024526	ENSG00000198758	EPS8L3	EPS8R3	EPS8-like 3	protein-coding
chr1	19756382	19756551	intron (NM_004930, intron 1 of 8)	intron (NM_004930, intron 1 of 8)	54735	NR_038125	832	Hs.432760	NM_001206540	ENSG00000077549	CAPZB	CAPB|CAPPB|CAPZ	capping protein (actin filament) muscle Z-line, beta	protein-coding
chr1	16960501	16960670	Intergenic	L1MC4a|LINE|L1	-3184	NR_026752	84809	Hs.733729	NR_026752		CROCCP2	CROCCL1	ciliary rootlet coiled-coil, rootletin pseudogene 2	pseudo
chr1	145059100	145059269	intron (NM_022359, intron 1 of 6)	intron (NM_022359, intron 1 of 6)	17002	NM_022359	9659	Hs.708687	NM_001002810	ENSG00000178104	PDE4DIP	CMYA2|MMGL	phosphodiesterase 4D interacting protein	protein-coding
chr1	2813532	2813701	Intergenic	(CA)n|Simple_repeat|Simple_repeat	-107386	NM_001242672	100287898	Hs.632363	NM_001242672	ENSG00000215912	TTC34	-	tetratricopeptide repeat domain 34	protein-coding
chr1	202996771	202996940	Intergenic	L2b|LINE|L2	20319	NM_001079809	653659	Hs.652908	NM_001079809		TMEM183B	C1orf37-DUP	transmembrane protein 183B	protein-coding
chr1	145290636	145290805	Intergenic	Intergenic	-2651	NM_001039703	100132406	Hs.721588	NM_001039703	ENSG00000163386	NBPF10	AB6|AG1|NBPF9	neuroblastoma breakpoint family, member 10	protein-coding
chr1	78806328	78806497	intron (NR_027310, intron 3 of 5)	intron (NR_027310, intron 3 of 5)	111129	NR_027310	149047	Hs.352665	NM_144700		MGC27382	-	uncharacterized MGC27382	miscRNA
chr1	31759256	31759425	intron (NM_004814, intron 4 of 9)	intron (NM_004814, intron 4 of 9)	10304	NM_004814	9410	Hs.33962	NM_004814	ENSG00000060688	SNRNP40	40K|HPRP8BP|PRP8BP|PRPF8BP|RP11-490K7.3|SPF38|WDR57	small nuclear ribonucleoprotein 40kDa (U5)	protein-coding
chr1	112158912	112159081	Intergenic	Intergenic	-3409	NM_001010935	5906	Hs.190334	NM_001010935	ENSG00000116473	RAP1A	KREV-1|KREV1|RAP1|SMGP21	RAP1A, member of RAS oncogene family	protein-coding
chr1	87685040	87685209	Intergenic	Intergenic	87515	NR_026985	339524	Hs.306423	NM_207357		LOC339524	-	uncharacterized LOC339524	miscRNA
chr1	235120275	235120444	Intergenic	Intergenic	170893	NR_002956	677802	Hs.533192	NR_002956		SNORA14B	ACA14b	small nucleolar RNA, H/ACA box 14B	snoRNA
chr1	12084105	12084274	intron (NM_021933, intron 4 of 9)	intron (NM_021933, intron 4 of 9)	4890	NM_021933	60672	Hs.8595	NM_021933	ENSG00000116691	MIIP	IIP45	migration and invasion inhibitory protein	protein-coding
chr1	87651512	87651681	Intergenic	Intergenic	53987	NR_026985	339524	Hs.306423	NM_207357		LOC339524	-	uncharacterized LOC339524	miscRNA
chr1	161493649	161493818	promoter-TSS (NM_002155)	promoter-TSS (NM_002155)	-303	NM_002155	3310	Hs.654614	NM_002155	ENSG00000173110	HSPA6	-	heat shock 70kDa protein 6 (HSP70B')	protein-coding
chr1	203496019	203496188	Intergenic	(CA)n|Simple_repeat|Simple_repeat	32832	NM_014359	26254	Hs.632468	NM_014359	ENSG00000188770	OPTC	OPT	opticin	protein-coding
chr1	86047323	86047492	intron (NM_001554, intron 2 of 4)	intron (NM_001554, intron 2 of 4)	963	NM_001554	3491	Hs.8867	NM_001554	ENSG00000142871	CYR61	CCN1|GIG1|IGFBP10	cysteine-rich, angiogenic inducer, 61	protein-coding
chr1	22699369	22699538	Intergenic	(GAATG)n|Simple_repeat|Simple_repeat	-78891	NM_014870	9923	Hs.418966	NM_001083621	ENSG00000184677	ZBTB40	ZNF923	zinc finger and BTB domain containing 40	protein-coding
chr1	27900829	27900998	intron (NM_001029882, intron 1 of 6)	MIRb|SINE|MIR	29230	NM_001029882	27245	Hs.469280	NM_001029882	ENSG00000126705	AHDC1	CL23945|DJ159A19.3|RP1-159A19.1	AT hook, DNA binding motif, containing 1	protein-coding
chr1	235097575	235097744	Intergenic	Intergenic	193593	NR_002956	677802	Hs.533192	NR_002956		SNORA14B	ACA14b	small nucleolar RNA, H/ACA box 14B	snoRNA
chr1	32224693	32224862	promoter-TSS (NR_036216)	promoter-TSS (NR_036216)	-441	NR_036216	100423028		NR_036216		MIR4254	-	microRNA 4254	miscRNA
chr1	96828231	96828400	Intergenic	L2a|LINE|L2	-358860	NM_021190	58155	Hs.596061	NM_021190	ENSG00000117569	PTBP2	PTB|PTBLP|brPTB|nPTB|nPTB5|nPTB6|nPTB7|nPTB8	polypyrimidine tract binding protein 2	protein-coding
chr1	19493479	19493648	exon (NM_020765, exon 29 of 106)	exon (NM_020765, exon 29 of 106)	43183	NM_020765	23352	Hs.649405	NM_020765	ENSG00000127481	UBR4	RBAF600|ZUBR1|p600	ubiquitin protein ligase E3 component n-recognin 4	protein-coding
chr1	60138633	60138802	intron (NM_001113411, intron 14 of 16)	intron (NM_001113411, intron 14 of 16)	60251	NR_039861	100616409		NR_039861		MIR4711	-	microRNA 4711	miscRNA
chr1	9537650	9537819	Intergenic	(CA)n|Simple_repeat|Simple_repeat	-61794	NM_032315	84275	Hs.568613	NM_032315	ENSG00000171612	SLC25A33	BMSC-MCP|PNC1	solute carrier family 25 (pyrimidine nucleotide carrier), member 33	protein-coding
chr1	59608929	59609098	intron (NR_027120, intron 1 of 2)	intron (NR_027120, intron 1 of 2)	3466	NR_027120	729467	Hs.662291	NR_027120		HSD52	-	uncharacterized LOC729467	miscRNA
chr1	27095462	27095631	intron (NM_006015, intron 11 of 19)	intron (NM_006015, intron 11 of 19)	-18908	NM_017837	55650	Hs.732254	NM_001202554	ENSG00000060642	PIGV	GPI-MT-II|HPMRS1|PIG-V	phosphatidylinositol glycan anchor biosynthesis, class V	protein-coding
chr1	33615649	33615818	intron (NM_018207, intron 4 of 4)	intron (NM_018207, intron 4 of 4)	31938	NM_018207	55223	Hs.656006	NM_018207	ENSG00000116525	TRIM62	DEAR1	tripartite motif containing 62	protein-coding
chr1	109099982	109100151	Intergenic	L2c|LINE|L2	-2905	NM_001010883	284611	Hs.200230	NM_001010883	ENSG00000162636	FAM102B	-	family with sequence similarity 102, member B	protein-coding
chr1	17530437	17530606	Intergenic	L2a|LINE|L2	-1100	NM_013358	29943	Hs.412941	NM_013358	ENSG00000142623	PADI1	HPAD10|PAD1|PDI|PDI1	peptidyl arginine deiminase, type I	protein-coding
chr1	45149211	45149380	intron (NM_001145636, intron 1 of 11)	L2b|LINE|L2	8901	NM_001145636	339541	Hs.173679	NM_001004307	ENSG00000198520	C1orf228	NCRNA00082|p40	chromosome 1 open reading frame 228	protein-coding
chr1	31279564	31279733	Intergenic	MIRb|SINE|MIR	-48965	NM_006762	7805	Hs.371021	NM_006762	ENSG00000162511	LAPTM5	CLAST6	lysosomal protein transmembrane 5	protein-coding
chr1	116280817	116280986	exon (NM_001232, exon 4 of 11)	exon (NM_001232, exon 4 of 11)	30525	NM_001232	845	Hs.57975	NM_001232	ENSG00000118729	CASQ2	PDIB2	calsequestrin 2 (cardiac muscle)	protein-coding
chr1	91275001	91275170	Intergenic	Intergenic	-92291	NM_020063	343472	Hs.451956	NM_020063	ENSG00000143032	BARHL2	-	BarH-like homeobox 2	protein-coding
chr1	4144727	4144896	Intergenic	Charlie25|DNA|hAT-Charlie	144139	NR_040065	728716	Hs.668359	NR_040065		LOC728716	-	uncharacterized LOC728716	miscRNA
chr1	30777056	30777225	Intergenic	MIR|SINE|MIR	-414479	NR_034182	100129196	Hs.659751	NR_034182		MATN1-AS1	-	MATN1 antisense RNA 1	miscRNA
chr1	210827207	210827376	intron (NM_018194, intron 11 of 11)	intron (NM_018194, intron 11 of 11)	324651	NM_001170580	55733	Hs.58650	NM_001122834	ENSG00000054392	HHAT	MART2|SKI1|Skn	hedgehog acyltransferase	protein-coding
chr1	235268151	235268320	Intergenic	Intergenic	23017	NR_002956	677802	Hs.533192	NR_002956		SNORA14B	ACA14b	small nucleolar RNA, H/ACA box 14B	snoRNA
chr1	241202381	241202550	intron (NM_002924, intron 3 of 17)	MLT1J2-int|LTR|ERVL-MaLR	-93107	NR_036069	100422856		NR_036069		MIR3123	-	microRNA 3123	miscRNA
chr1	59788287	59788456	intron (NM_001244714, intron 2 of 13)	intron (NM_001244714, intron 2 of 13)	12621	NM_001244714	55277	Hs.444301	NM_001113411	ENSG00000172456	FGGY	-	FGGY carbohydrate kinase domain containing	protein-coding
chr1	52102798	52102967	intron (NM_148906, intron 1 of 22)	MIR|SINE|MIR	20336	NM_148906	114883	Hs.738830	NM_024586	ENSG00000117859	OSBPL9	ORP-9|ORP9	oxysterol binding protein-like 9	protein-coding
chr1	15202566	15202735	intron (NM_201628, intron 1 of 14)	intron (NM_201628, intron 1 of 14)	-47975	NM_001018000	23254	Hs.368823	NM_001017999	ENSG00000189337	KAZN	KAZ	kazrin, periplakin interacting protein	protein-coding
chr1	21966879	21967048	intron (NM_002885, intron 2 of 24)	intron (NM_002885, intron 2 of 24)	11385	NM_001145658	5909	Hs.148178	NM_001145657	ENSG00000076864	RAP1GAP	RAP1GA1|RAP1GAP1|RAP1GAPII|RAPGAP	RAP1 GTPase activating protein	protein-coding
chr1	28066860	28067029	intron (NM_152660, intron 4 of 8)	intron (NM_152660, intron 4 of 8)	14454	NM_001143914	199870	Hs.469359	NM_001143912	ENSG00000009780	FAM76A	-	family with sequence similarity 76, member A	protein-coding
chr1	155992147	155992316	Intergenic	L2b|LINE|L2	-1473	NM_003145	6746	Hs.74564	NM_003145	ENSG00000163479	SSR2	TLAP|TRAP-BETA|TRAPB	signal sequence receptor, beta (translocon-associated protein beta)	protein-coding
chr1	59076200	59076369	Intergenic	THE1C|LTR|ERVL-MaLR	-33118	NM_002353	4070	Hs.23582	NM_002353	ENSG00000184292	TACSTD2	EGP-1|EGP1|GA733-1|GA7331|GP50|M1S1|TROP2	tumor-associated calcium signal transducer 2	protein-coding
chr1	117424720	117424889	Intergenic	Intergenic	-27885	NM_020440	5738	Hs.418093	NM_020440	ENSG00000134247	PTGFRN	CD315|CD9P-1|EWI-F|FPRP|SMAP-6	prostaglandin F2 receptor negative regulator	protein-coding
chr1	153688508	153688677	Intergenic	LTR48B|LTR|ERV1	-11975	NM_023015	65123	Hs.516522	NM_023015	ENSG00000143624	INTS3	C1orf193|C1orf60|INT3|SOSS-A	integrator complex subunit 3	protein-coding
chr1	201899205	201899374	intron (NM_012134, intron 1 of 2)	L2c|LINE|L2	16427	NM_012134	25802	Hs.519075	NM_012134	ENSG00000163431	LMOD1	1D|64kD|D1|SM-LMOD	leiomodin 1 (smooth muscle)	protein-coding
chr1	95112444	95112613	Intergenic	Intergenic	-105115	NM_001993	2152	Hs.62192	NM_001178096	ENSG00000117525	F3	CD142|TF|TFA	coagulation factor III (thromboplastin, tissue factor)	protein-coding
chr1	144882662	144882831	exon (NM_001198834, exon 24 of 44)	exon (NM_001198834, exon 24 of 44)	49286	NM_001002811	9659	Hs.708687	NM_001002810	ENSG00000178104	PDE4DIP	CMYA2|MMGL	phosphodiesterase 4D interacting protein	protein-coding
chr1	28267889	28268058	intron (NM_001009568, intron 1 of 6)	L2a|LINE|L2	6469	NM_001009568	27293	Hs.123659	NM_001009568	ENSG00000130768	SMPDL3B	ASML3B	sphingomyelin phosphodiesterase, acid-like 3B	protein-coding
chr1	214731494	214731663	Intergenic	Intergenic	-6554	NM_005401	5784	Hs.193557	NM_005401	ENSG00000152104	PTPN14	PEZ|PTP36	protein tyrosine phosphatase, non-receptor type 14	protein-coding
chr1	203387308	203387477	Intergenic	L2c|LINE|L2	-57491	NM_002725	5549	Hs.632481	NM_002725	ENSG00000188783	PRELP	MST161|MSTP161|SLRR2A	proline/arginine-rich end leucine-rich repeat protein	protein-coding
chr1	10166676	10166845	intron (NM_001105562, intron 7 of 27)	intron (NM_001105562, intron 7 of 27)	73719	NM_006048	10277	Hs.593974	NM_001105562	ENSG00000130939	UBE4B	E4|HDNB1|UBOX3|UFD2|UFD2A	ubiquitination factor E4B	protein-coding
chr1	145457866	145458035	exon (NM_032305, exon 4 of 8)	exon (NM_032305, exon 4 of 8)	12437	NM_032305	84265	Hs.591456	NM_032305	ENSG00000121851	POLR3GL	RPC32HOM|flj32422	polymerase (RNA) III (DNA directed) polypeptide G (32kD)-like	protein-coding
chr1	45483053	45483222	3' UTR (NM_020883, exon 14 of 14)	3' UTR (NM_020883, exon 14 of 14)	5332	NR_036510	7389	Hs.78601	NM_000374	ENSG00000126088	UROD	PCT|UPD	uroporphyrinogen decarboxylase	protein-coding
chr1	28624500	28624669	Intergenic	Intergenic	-30929	NM_001127350	54797	Hs.479911	NM_001127350	ENSG00000130772	MED18	p28b	mediator complex subunit 18	protein-coding
chr1	153929543	153929712	intron (NM_181715, intron 1 of 13)	intron (NM_181715, intron 1 of 13)	1505	NM_181715	200186	Hs.406392	NM_181715	ENSG00000160741	CRTC2	TORC-2|TORC2	CREB regulated transcription coactivator 2	protein-coding
chr1	184087215	184087384	Intergenic	Intergenic	66488	NR_023349	116461	Hs.548197	NM_001127394	ENSG00000198860	TSEN15	C1orf19|sen15	tRNA splicing endonuclease 15 homolog (S. cerevisiae)	protein-coding
chr1	107973378	107973547	exon (NM_001113226, exon 6 of 8)	exon (NM_001113226, exon 6 of 8)	257664	NM_001079874	10451	Hs.267659	NM_001079874	ENSG00000134215	VAV3	-	vav 3 guanine nucleotide exchange factor	protein-coding
chr1	5804776	5804945	Intergenic	(CA)n|Simple_repeat|Simple_repeat	117941	NR_039838	100616421		NR_039838		MIR4689	-	microRNA 4689	miscRNA
chr1	156069195	156069364	intron (NR_047544, intron 3 of 12)	intron (NR_047544, intron 3 of 12)	-15182	NM_170707	4000	Hs.594444	NM_001257374	ENSG00000160789	LMNA	CDCD1|CDDC|CMD1A|CMT2B1|EMD2|FPL|FPLD|FPLD2|HGPS|IDC|LDP1|LFP|LGMD1B|LMN1|LMNC|LMNL1|PRO1	lamin A/C	protein-coding
chr1	234914887	234915056	Intergenic	Intergenic	55182	NR_038856	100506810	Hs.586634	NR_038856		LOC100506810	-	uncharacterized LOC100506810	miscRNA
chr1	210543183	210543352	intron (NM_018194, intron 3 of 11)	intron (NM_018194, intron 3 of 11)	40627	NM_001170580	55733	Hs.58650	NM_001122834	ENSG00000054392	HHAT	MART2|SKI1|Skn	hedgehog acyltransferase	protein-coding
chr1	4722190	4722359	intron (NM_018836, intron 1 of 5)	L1MB7|LINE|L1	7169	NM_018836	55966	Hs.25924	NM_001042478	ENSG00000196581	AJAP1	MOT8|RP3-426F10.1|SHREW-1|SHREW1	adherens junctions associated protein 1	protein-coding
chr1	112496774	112496943	intron (NM_004980, intron 2 of 7)	LTR33|LTR|ERVL	34919	NM_172198	3752	Hs.666367	NM_004980	ENSG00000171385	KCND3	KCND3L|KCND3S|KSHIVB|KV4.3	potassium voltage-gated channel, Shal-related subfamily, member 3	protein-coding
chr1	204203285	204203454	intron (NM_014935, intron 17 of 22)	MLT1C|LTR|ERVL-MaLR	-20149	NM_198447	127845	Hs.532401	NM_198447	ENSG00000174567	GOLT1A	CGI-141|GOT1|HMFN1187|RP11-203F10.3|YMR292W	golgi transport 1A	protein-coding
chr1	152157750	152157919	Intergenic	Intergenic	-26130	NM_001122965	126638	Hs.376144	NM_152364	ENSG00000215853	RPTN	-	repetin	protein-coding
chr1	205145269	205145438	intron (NM_015375, intron 2 of 12)	AluSp|SINE|Alu	35374	NM_015375	25778	Hs.6874	NM_015375	ENSG00000133059	DSTYK	DustyPK|RIP5|RIPK5	dual serine/threonine and tyrosine protein kinase	protein-coding
chr1	165334178	165334347	Intergenic	Intergenic	-8310	NM_177398	4009	Hs.667312	NM_001033507	ENSG00000162761	LMX1A	LMX1|LMX1.1	LIM homeobox transcription factor 1, alpha	protein-coding
chr1	144922098	144922267	intron (NM_001002811, intron 4 of 18)	intron (NM_001002811, intron 4 of 18)	9850	NM_001002811	9659	Hs.708687	NM_001002810	ENSG00000178104	PDE4DIP	CMYA2|MMGL	phosphodiesterase 4D interacting protein	protein-coding
chr1	10555201	10555370	intron (NM_004565, intron 1 of 8)	intron (NM_004565, intron 1 of 8)	20282	NM_004565	5195	Hs.149983	NM_004565	ENSG00000142655	PEX14	NAPP2|Pex14p|dJ734G22.2	peroxisomal biogenesis factor 14	protein-coding
chr1	220657385	220657554	Intergenic	Intergenic	-44099	NM_018650	4139	Hs.497806	NM_018650	ENSG00000116141	MARK1	MARK|Par-1c|Par1c	MAP/microtubule affinity-regulating kinase 1	protein-coding
chr1	52390787	52390956	intron (NM_002867, intron 4 of 4)	intron (NM_002867, intron 4 of 4)	-46262	NM_001101662	4898	Hs.584782	NM_001101662	ENSG00000078618	NRD1	hNRD1|hNRD2	nardilysin (N-arginine dibasic convertase)	protein-coding
chr1	59422638	59422807	Intergenic	Intergenic	171899	NR_034015	100131060	Hs.680604	NR_034014		LOC100131060	-	uncharacterized LOC100131060	miscRNA
chr1	230249721	230249890	intron (NM_004481, intron 1 of 15)	intron (NM_004481, intron 1 of 15)	46849	NM_004481	2590	Hs.731416	NM_004481	ENSG00000143641	GALNT2	GalNAc-T2	UDP-N-acetyl-alpha-D-galactosamine:polypeptide N-acetylgalactosaminyltransferase 2 (GalNAc-T2)	protein-coding
chr1	209841319	209841488	Intergenic	L2b|LINE|L2	-7267	NM_015714	50486	Hs.432132	NM_015714	ENSG00000123689	G0S2	RP1-28O10.2	G0/G1switch 2	protein-coding
chr1	204247044	204247213	intron (NM_014935, intron 1 of 22)	intron (NM_014935, intron 1 of 22)	-63908	NM_198447	127845	Hs.532401	NM_198447	ENSG00000174567	GOLT1A	CGI-141|GOT1|HMFN1187|RP11-203F10.3|YMR292W	golgi transport 1A	protein-coding
chr1	34279358	34279527	intron (NM_052896, intron 9 of 69)	L2|LINE|L2	-46634	NM_145205	127540	Hs.667683	NM_145205	ENSG00000176256	HMGB4	dJ1007G16.5	high mobility group box 4	protein-coding
chr1	204378615	204378784	exon (NM_032833, exon 1 of 2)	exon (NM_032833, exon 1 of 2)	2245	NM_032833	84919	Hs.304376	NM_032833	ENSG00000158615	PPP1R15B	CREP	protein phosphatase 1, regulatory subunit 15B	protein-coding
chr1	12540877	12541046	intron (NM_018156, intron 66 of 68)	intron (NM_018156, intron 66 of 68)	-26339	NR_003025	677885	Hs.721005	NR_003025		SNORA59A	ACA59	small nucleolar RNA, H/ACA box 59A	snoRNA
chr1	109733684	109733853	intron (NR_049774, intron 4 of 14)	MIRc|SINE|MIR	3167	NM_001267049	57535	Hs.708190	NM_001267048	ENSG00000116299	KIAA1324	EIG121	KIAA1324	protein-coding
chr1	64853702	64853871	Intergenic	Intergenic	-82690	NM_020925	57685	Hs.443891	NM_020925	ENSG00000158966	CACHD1	RP4-655E10.1	cache domain containing 1	protein-coding
chr1	161409166	161409335	Intergenic	L1MA4A|LINE|L1	-65955	NM_021642	2212	Hs.352642	NM_001136219	ENSG00000143226	FCGR2A	CD32|CD32A|CDw32|FCG2|FCGR2|FCGR2A1|FcGR|IGFR2	Fc fragment of IgG, low affinity IIa, receptor (CD32)	protein-coding
chr1	59445216	59445385	Intergenic	Intergenic	167179	NR_027120	729467	Hs.662291	NR_027120		HSD52	-	uncharacterized LOC729467	miscRNA
chr1	114761328	114761497	Intergenic	(TG)n|Simple_repeat|Simple_repeat	-64940	NM_001270805	148281	Hs.736999	NM_001270805	ENSG00000134207	SYT6	sytVI	synaptotagmin VI	protein-coding
chr1	118690297	118690466	intron (NM_206996, intron 3 of 48)	intron (NM_206996, intron 3 of 48)	37467	NM_206996	200162	Hs.528821	NM_206996	ENSG00000155761	SPAG17	PF6|RP4-776P7.2	sperm associated antigen 17	protein-coding
chr1	202681823	202681992	Intergenic	Intergenic	-2356	NM_177402	127833	Hs.25422	NM_001136504	ENSG00000143858	SYT2	SytII	synaptotagmin II	protein-coding
chr1	7362835	7363004	intron (NM_015215, intron 5 of 22)	intron (NM_015215, intron 5 of 22)	-468410	NM_004781	9341	Hs.66708	NM_004781	ENSG00000049245	VAMP3	CEB	vesicle-associated membrane protein 3 (cellubrevin)	protein-coding
chr1	22091577	22091746	intron (NM_032236, intron 1 of 26)	intron (NM_032236, intron 1 of 26)	18027	NM_001032730	84196	Hs.467524	NM_001032730	ENSG00000090686	USP48	RAP1GA1|USP31	ubiquitin specific peptidase 48	protein-coding
chr1	226910203	226910372	intron (NM_002221, intron 2 of 7)	intron (NM_002221, intron 2 of 7)	16589	NM_002221	3707	Hs.741374	NM_002221	ENSG00000143772	ITPKB	IP3-3KB|IP3K|IP3K-B|IP3KB|PIG37	inositol-trisphosphate 3-kinase B	protein-coding
chr1	17643396	17643565	intron (NM_012387, intron 1 of 15)	MIRc|SINE|MIR	8790	NM_012387	23569	Hs.522969	NM_012387	ENSG00000159339	PADI4	PAD|PAD4|PADI5|PDI4|PDI5	peptidyl arginine deiminase, type IV	protein-coding
chr1	15664821	15664990	intron (NM_052929, intron 14 of 30)	MLT1D|LTR|ERVL-MaLR	-71486	NM_024329	79180	Hs.465374	NM_024329	ENSG00000142634	EFHD2	SWS1	EF-hand domain family, member D2	protein-coding
chr1	216484355	216484524	intron (NM_007123, intron 9 of 20)	L1M3f|LINE|L1	112299	NM_206933	7399	Hs.655974	NM_007123	ENSG00000042781	USH2A	RP39|US2|USH2|dJ1111A8.1	Usher syndrome 2A (autosomal recessive, mild)	protein-coding
chr1	32868163	32868332	Intergenic	Intergenic	-8185	NM_018045	55108	Hs.353454	NM_001143888	ENSG00000160058	BSDC1	-	BSD domain containing 1	protein-coding
chr1	151029160	151029329	5' UTR (NM_001038707, exon 2 of 6)	5' UTR (NM_001038707, exon 2 of 6)	2881	NM_020239	56882	Hs.22065	NM_001038707	ENSG00000197622	CDC42SE1	SCIP1|SPEC1	CDC42 small effector 1	protein-coding
chr1	151585807	151585976	intron (NM_030918, intron 1 of 11)	intron (NM_030918, intron 1 of 11)	1229	NM_030918	81609	Hs.192326	NM_030918	ENSG00000143376	SNX27	MRT1|MY014	sorting nexin family member 27	protein-coding
chr1	160078365	160078534	Intergenic	Intergenic	-7071	NM_000702	477	Hs.34114	NM_000702	ENSG00000018625	ATP1A2	FHM2|MHP2	ATPase, Na+/K+ transporting, alpha 2 polypeptide	protein-coding
chr1	4365975	4366144	Intergenic	MER66B|LTR|ERV1	-106052	NR_027088	284661	Hs.278112	NR_027088		LOC284661	-	uncharacterized LOC284661	miscRNA
chr1	17578314	17578483	intron (NM_016233, intron 1 of 15)	intron (NM_016233, intron 1 of 15)	2805	NM_016233	51702	Hs.149195	NM_016233	ENSG00000142619	PADI3	PAD3|PDI3	peptidyl arginine deiminase, type III	protein-coding
chr1	100768231	100768400	Intergenic	ERVL-E-int|LTR|ERVL	21518	NR_030279	693138		NR_030279		MIR553	MIRN553|hsa-mir-553	microRNA 553	miscRNA
chr1	21865487	21865656	intron (NM_001127501, intron 1 of 10)	intron (NM_001127501, intron 1 of 10)	29713	NM_001177520	249	Hs.75431	NM_000478	ENSG00000162551	ALPL	AP-TNAP|APTNAP|HOPS|TNAP|TNSALP	alkaline phosphatase, liver/bone/kidney	protein-coding
chr1	151234695	151234864	intron (NM_002810, intron 2 of 9)	intron (NM_002810, intron 2 of 9)	7582	NM_002810	5710	Hs.505059	NM_002810	ENSG00000159352	PSMD4	AF|AF-1|ASF|MCB1|Rpn10|S5A|pUB-R5	proteasome (prosome, macropain) 26S subunit, non-ATPase, 4	protein-coding
chr1	233118114	233118283	Intergenic	Intergenic	31828	NM_032324	84284	Hs.642715	NM_032324	ENSG00000135778	NTPCR	C1orf57|HCR-NTPase|RP4-678E16.2	nucleoside-triphosphatase, cancer-related	protein-coding
chr1	7317404	7317573	intron (NM_015215, intron 5 of 22)	intron (NM_015215, intron 5 of 22)	472104	NR_038934	23261	Hs.671020	NM_001195563	ENSG00000171735	CAMTA1	CANPMR	calmodulin binding transcription activator 1	protein-coding
chr1	207566776	207566945	Intergenic	L1MC1|LINE|L1	-60785	NM_001006658	1380	Hs.445757	NM_001006658	ENSG00000117322	CR2	C3DR|CD21|CR|CVID7|SLEB9	complement component (3d/Epstein Barr virus) receptor 2	protein-coding
chr1	15650358	15650527	intron (NM_052929, intron 10 of 30)	intron (NM_052929, intron 10 of 30)	76674	NM_052929	114827	Hs.659997	NM_052929	ENSG00000142621	FHAD1	-	forkhead-associated (FHA) phosphopeptide binding domain 1	protein-coding
chr1	32236230	32236399	Intergenic	Intergenic	-6666	NM_001703	576	Hs.524138	NM_001703	ENSG00000121753	BAI2	-	brain-specific angiogenesis inhibitor 2	protein-coding
chr1	144015737	144015906	intron (NR_034178, intron 2 of 3)	MER5A1|DNA|hAT-Charlie	100073	NR_034178	647135	Hs.191475	NR_034178		SRGAP2B	SRGAP2L|SRGAP2P2	SLIT-ROBO Rho GTPase activating protein 2B (pseudogene)	pseudo
chr1	11768670	11768839	intron (NM_198545, intron 2 of 6)	MIRb|SINE|MIR	16973	NM_198545	374946	Hs.733197	NM_198545	ENSG00000162490	DRAXIN	AGPA3119|C1orf187|UNQ3119|neucrin	dorsal inhibitory axon guidance protein	protein-coding
chr1	234864074	234864243	non-coding (NR_038856, exon 3 of 3)	non-coding (NR_038856, exon 3 of 3)	4369	NR_038856	100506810	Hs.586634	NR_038856		LOC100506810	-	uncharacterized LOC100506810	miscRNA
chr1	28497878	28498047	intron (NM_001164722, intron 1 of 1)	intron (NM_001164722, intron 1 of 1)	5493	NM_000952	5724	Hs.77542	NM_000952	ENSG00000169403	PTAFR	PAFR	platelet-activating factor receptor	protein-coding
chr1	117032042	117032211	Intergenic	Intergenic	-70882	NR_027646	84852	Hs.664752	NR_024124		ATP1A1OS	C1orf203	ATP1A1 opposite strand	miscRNA
chr1	33592625	33592794	Intergenic	Intergenic	45995	NM_052998	113451	Hs.101807	NM_052998	ENSG00000142920	ADC	AZI2|ODC-p|ODC1L	arginine decarboxylase	protein-coding
chr1	41346699	41346868	Intergenic	Intergenic	-18765	NM_133467	163732	Hs.355820	NM_133467	ENSG00000179862	CITED4	-	Cbp/p300-interacting transactivator, with Glu/Asp-rich carboxy-terminal domain, 4	protein-coding
chr1	17474388	17474557	Intergenic	Intergenic	-28524	NM_007365	11240	Hs.33455	NM_007365	ENSG00000117115	PADI2	PAD-H19|PAD2|PDI2	peptidyl arginine deiminase, type II	protein-coding
chr1	115000988	115001157	intron (NM_033020, intron 4 of 18)	LTR8A|LTR|ERV1	52709	NM_015906	51592	Hs.26837	NM_015906	ENSG00000197323	TRIM33	ECTO|PTC7|RFG7|TF1G|TIF1G|TIF1GAMMA|TIFGAMMA	tripartite motif containing 33	protein-coding
chr1	18674289	18674458	intron (NM_032880, intron 4 of 9)	L2b|LINE|L2	-133051	NM_152375	127707	Hs.710799	NM_152375	ENSG00000179023	KLHDC7A	RP11-422P22.2	kelch domain containing 7A	protein-coding
chr1	19087305	19087474	Intergenic	Intergenic	98766	NM_152232	80834	Hs.553548	NM_152232	ENSG00000179002	TAS1R2	GPR71|T1R2|TR2	taste receptor, type 1, member 2	protein-coding
chr1	18581967	18582136	intron (NM_032880, intron 2 of 9)	intron (NM_032880, intron 2 of 9)	147811	NM_032880	84966	Hs.212511	NM_032880	ENSG00000117154	IGSF21	-	immunoglobin superfamily, member 21	protein-coding
chr1	203449228	203449397	intron (NM_002725, intron 1 of 2)	intron (NM_002725, intron 1 of 2)	4429	NM_201348	5549	Hs.632481	NM_002725	ENSG00000188783	PRELP	MST161|MSTP161|SLRR2A	proline/arginine-rich end leucine-rich repeat protein	protein-coding
chr1	23720882	23721051	intron (NM_003196, intron 7 of 10)	intron (NM_003196, intron 7 of 10)	-24609	NM_001077195	80818	Hs.293798	NM_001077195	ENSG00000125945	ZNF436	ZNF|Zfp46	zinc finger protein 436	protein-coding
chr1	23450773	23450942	intron (NM_033631, intron 1 of 4)	MIR3|SINE|MIR	44494	NM_001142546	7798	Hs.257900	NM_001142546	ENSG00000169641	LUZP1	LUZP	leucine zipper protein 1	protein-coding
chr1	65934793	65934962	intron (NM_001003680, intron 2 of 19)	intron (NM_001003680, intron 2 of 19)	48478	NM_001198681	54741	Hs.23581	NM_001198681	ENSG00000213625	LEPROT	LEPR|OB-RGRP|OBRGRP|VPS55	leptin receptor overlapping transcript	protein-coding
chr1	114892034	114892203	Intergenic	LTR65|LTR|ERV1	161663	NM_015906	51592	Hs.26837	NM_015906	ENSG00000197323	TRIM33	ECTO|PTC7|RFG7|TF1G|TIF1G|TIF1GAMMA|TIFGAMMA	tripartite motif containing 33	protein-coding
chr1	159859192	159859361	intron (NM_012337, intron 3 of 11)	AmnSINE1|SINE|Deu	10630	NM_012337	25790	Hs.647705	NM_012337	ENSG00000213085	CCDC19	NESG1	coiled-coil domain containing 19	protein-coding
chr1	23183444	23183613	intron (NM_017449, intron 3 of 15)	L2b|LINE|L2	6191	NR_036214	100422914		NR_036214		MIR4253	-	microRNA 4253	miscRNA
chr1	15026602	15026771	intron (NM_201628, intron 1 of 14)	intron (NM_201628, intron 1 of 14)	101473	NM_201628	23254	Hs.368823	NM_001017999	ENSG00000189337	KAZN	KAZ	kazrin, periplakin interacting protein	protein-coding
chr1	28040684	28040853	Intergenic	Intergenic	-11722	NM_152660	199870	Hs.469359	NM_001143912	ENSG00000009780	FAM76A	-	family with sequence similarity 76, member A	protein-coding
chr1	31414795	31414964	exon (NM_014676, exon 19 of 22)	exon (NM_014676, exon 19 of 22)	-6256	NR_033295	692235		NR_033295		SNORD103B	U103B	small nucleolar RNA, C/D box 103B	snoRNA
chr1	26424579	26424748	Intergenic	L2a|LINE|L2	-12993	NM_001243532	149420	Hs.736837	NM_001243532	ENSG00000175087	PDIK1L	CLIK1L|STK35L2	PDLIM1 interacting kinase 1 like	protein-coding
chr1	16835715	16835884	Intergenic	MER87|LTR|ERV1	-16603	NR_023386	114819	Hs.597881	NR_023386		CROCCP3	CROCCL2|dJ798A10.2	ciliary rootlet coiled-coil, rootletin pseudogene 3	pseudo
chr1	22942772	22942941	Intergenic	L2a|LINE|L2	-20262	NM_015991	712	Hs.632379	NM_015991	ENSG00000173372	C1QA	-	complement component 1, q subcomponent, A chain	protein-coding
chr1	18095409	18095578	intron (NM_030812, intron 1 of 2)	MIRb|SINE|MIR	13685	NM_030812	81569	Hs.2149	NM_030812	ENSG00000117148	ACTL8	CT57	actin-like 8	protein-coding
chr1	101023202	101023371	Intergenic	L1M1|LINE|L1	19558	NM_022049	54112	Hs.170053	NM_022049	ENSG00000181656	GPR88	STRG	G protein-coupled receptor 88	protein-coding
chr1	64529593	64529762	intron (NM_005012, intron 4 of 8)	intron (NM_005012, intron 4 of 8)	-139813	NM_152489	148581	Hs.388746	NM_152489	ENSG00000177414	UBE2U	RP4-636O23.1	ubiquitin-conjugating enzyme E2U (putative)	protein-coding
chr1	6711019	6711188	intron (NM_018198, intron 7 of 15)	intron (NM_018198, intron 7 of 15)	25893	NM_001195752	90326	Hs.689006	NM_001195752	ENSG00000041988	THAP3	-	THAP domain containing, apoptosis associated protein 3	protein-coding
chr1	152025338	152025507	Intergenic	Intergenic	-15911	NM_005620	6282	Hs.417004	NM_005620	ENSG00000163191	S100A11	MLN70|S100C	S100 calcium binding protein A11	protein-coding
chr1	54795272	54795441	intron (NM_145716, intron 4 of 17)	intron (NM_145716, intron 4 of 17)	76623	NM_145716	23648	Hs.658676	NM_001009955	ENSG00000157216	SSBP3	CSDP|SSDP|SSDP1	single stranded DNA binding protein 3	protein-coding
chr1	24020181	24020350	intron (NM_000975, intron 2 of 5)	intron (NM_000975, intron 2 of 5)	1996	NM_001199802	6135	Hs.719951	NM_000975	ENSG00000142676	RPL11	DBA7|GIG34|L11	ribosomal protein L11	protein-coding
chr1	68230271	68230440	intron (NM_018841, intron 2 of 3)	intron (NM_018841, intron 2 of 3)	-67616	NR_040077	100289178	Hs.677603	NR_040077		GNG12-AS1	-	GNG12 antisense RNA 1	miscRNA
chr1	161700093	161700262	Intergenic	Intergenic	7720	NM_001002901	127943	Hs.517422	NM_001002901	ENSG00000162746	FCRLB	FCRL2|FCRLM2|FCRLY|FREB-2|FcRY	Fc receptor-like B	protein-coding
chr1	30204435	30204604	Intergenic	L2c|LINE|L2	641491	NM_001195001	10076	Hs.19718	NM_001195001	ENSG00000060656	PTPRU	FMI|PCP-2|PTP|PTP-J|PTP-PI|PTP-RO|PTPPSI|PTPRO|PTPU2|R-PTP-PSI|R-PTP-U|hPTP-J	protein tyrosine phosphatase, receptor type, U	protein-coding
chr1	151329318	151329487	Intergenic	Intergenic	-9633	NM_000449	5993	Hs.632472	NM_000449	ENSG00000143390	RFX5	-	regulatory factor X, 5 (influences HLA class II expression)	protein-coding
chr1	113118102	113118271	intron (NM_138727, intron 11 of 14)	MER44B|DNA|TcMar-Tigger	43854	NM_138727	54879	Hs.201921	NM_017744	ENSG00000007341	ST7L	FAM4B|ST7R|STLR	suppression of tumorigenicity 7 like	protein-coding
chr1	156184215	156184384	intron (NM_001199664, intron 1 of 4)	L2b|LINE|L2	1520	NM_001199663	100527963	Hs.654541	NM_001199661	ENSG00000160783	PMF1-BGLAP	PMF1	PMF1-BGLAP readthrough	protein-coding
chr1	49332729	49332898	intron (NM_032785, intron 6 of 13)	intron (NM_032785, intron 6 of 13)	-90266	NM_024603	79656	Hs.475348	NM_024603	ENSG00000162373	BEND5	C1orf165	BEN domain containing 5	protein-coding
chr1	212818561	212818730	Intergenic	L2c|LINE|L2	20856	NM_153606	149647	Hs.129293	NM_153606	ENSG00000162771	FAM71A	RP11-338C15.4	family with sequence similarity 71, member A	protein-coding
chr1	94218805	94218974	intron (NM_001261408, intron 2 of 13)	intron (NM_001261408, intron 2 of 13)	-71495	NM_003567	8412	Hs.36958	NM_001261408	ENSG00000137936	BCAR3	NSP2|SH2D3B	breast cancer anti-estrogen resistance 3	protein-coding
chr1	14650519	14650688	Intergenic	MLT1I-int|LTR|ERVL-MaLR	-274610	NM_015209	23254	Hs.368823	NM_001017999	ENSG00000189337	KAZN	KAZ	kazrin, periplakin interacting protein	protein-coding
chr1	202570026	202570195	intron (NM_177402, intron 6 of 8)	MIRc|SINE|MIR	42471	NM_001136504	127833	Hs.25422	NM_001136504	ENSG00000143858	SYT2	SytII	synaptotagmin II	protein-coding
chr1	237068522	237068691	Intergenic	Tigger14a|DNA|TcMar-Tigger	110025	NM_000254	4548	Hs.498187	NM_000254	ENSG00000116984	MTR	MS|cblG	5-methyltetrahydrofolate-homocysteine methyltransferase	protein-coding
chr1	12627956	12628125	3' UTR (NM_004753, exon 6 of 6)	3' UTR (NM_004753, exon 6 of 6)	49780	NM_004753	9249	Hs.289347	NM_004753	ENSG00000162496	DHRS3	DD83.1|RDH17|Rsdr1|SDR1|SDR16C1|retSDR1	dehydrogenase/reductase (SDR family) member 3	protein-coding
chr1	150457073	150457242	Intergenic	Intergenic	-2763	NM_025150	80222	Hs.288974	NM_025150	ENSG00000143374	TARS2	TARSL1	threonyl-tRNA synthetase 2, mitochondrial (putative)	protein-coding
chr1	245504198	245504367	intron (NM_018012, intron 2 of 14)	L2a|LINE|L2	185995	NM_018012	55083	Hs.368096	NM_018012	ENSG00000162849	KIF26B	-	kinesin family member 26B	protein-coding
chr1	156453464	156453633	intron (NM_005920, intron 1 of 11)	intron (NM_005920, intron 1 of 11)	16981	NM_005920	4209	Hs.314327	NM_005920	ENSG00000116604	MEF2D	-	myocyte enhancer factor 2D	protein-coding
chr1	18854019	18854188	Intergenic	MIRb|SINE|MIR	46679	NM_152375	127707	Hs.710799	NM_152375	ENSG00000179023	KLHDC7A	RP11-422P22.2	kelch domain containing 7A	protein-coding
chr1	110178976	110179145	Intergenic	MIRb|SINE|MIR	11011	NM_203404	271	Hs.82927	NM_001257360	ENSG00000116337	AMPD2	-	adenosine monophosphate deaminase 2	protein-coding
chr1	79158128	79158297	Intergenic	Intergenic	42735	NM_006417	10561	Hs.82316	NM_006417	ENSG00000137965	IFI44	MTAP44|p44	interferon-induced protein 44	protein-coding
chr1	1708512	1708681	intron (NM_001198994, intron 1 of 13)	intron (NM_001198994, intron 1 of 13)	1313	NM_023018	65220	Hs.733075	NM_001198993	ENSG00000008130	NADK	dJ283E3.1	NAD kinase	protein-coding
chr1	23848841	23849010	intron (NM_004091, intron 2 of 6)	MIR|SINE|MIR	8787	NM_004091	1870	Hs.194333	NM_004091	ENSG00000007968	E2F2	E2F-2	E2F transcription factor 2	protein-coding
chr1	15288381	15288550	intron (NM_001017999, intron 2 of 7)	intron (NM_001017999, intron 2 of 7)	16050	NM_001017999	23254	Hs.368823	NM_001017999	ENSG00000189337	KAZN	KAZ	kazrin, periplakin interacting protein	protein-coding
chr1	210866019	210866188	intron (NM_172362, intron 10 of 10)	MLT1C|LTR|ERVL-MaLR	363463	NM_001170580	55733	Hs.58650	NM_001122834	ENSG00000054392	HHAT	MART2|SKI1|Skn	hedgehog acyltransferase	protein-coding
chr1	119913486	119913655	intron (NM_016527, intron 1 of 7)	intron (NM_016527, intron 1 of 7)	2168	NM_001005783	51179	Hs.659767	NM_001005783	ENSG00000116882	HAO2	GIG16|HAOX2	hydroxyacid oxidase 2 (long chain)	protein-coding
chr1	231940252	231940421	intron (NM_001012959, intron 8 of 9)	AluJo|SINE|Alu	13927	NR_002227	27184	Hs.720568	NR_002227		DISC2	DISC1-AS1|DISC1OS|NCRNA00015	disrupted in schizophrenia 2 (non-protein coding)	miscRNA
chr1	149684150	149684319	Intergenic	Intergenic	-70016	NM_000566	2209	Hs.77424	NM_000566	ENSG00000150337	FCGR1A	CD64|CD64A|FCRI|IGFR1	Fc fragment of IgG, high affinity Ia, receptor (CD64)	protein-coding
chr1	22645552	22645721	Intergenic	L2a|LINE|L2	-132708	NM_014870	9923	Hs.418966	NM_001083621	ENSG00000184677	ZBTB40	ZNF923	zinc finger and BTB domain containing 40	protein-coding
chr1	169026038	169026207	Intergenic	Intergenic	-49825	NM_001677	481	Hs.291196	NM_001677	ENSG00000143153	ATP1B1	ATP1B	ATPase, Na+/K+ transporting, beta 1 polypeptide	protein-coding
chr1	203595261	203595430	promoter-TSS (NM_001684)	promoter-TSS (NM_001684)	-570	NM_001001396	493	Hs.733333	NM_001001396	ENSG00000058668	ATP2B4	ATP2B2|MXRA1|PMCA4|PMCA4b|PMCA4x	ATPase, Ca++ transporting, plasma membrane 4	protein-coding
chr1	218665920	218666089	Intergenic	Intergenic	-146984	NR_046268	728463	Hs.568469	NR_046268		LOC728463	-	uncharacterized LOC728463	miscRNA
chr1	116215256	116215425	intron (NM_138959, intron 4 of 7)	intron (NM_138959, intron 4 of 7)	30090	NM_001172412	81839	Hs.515130	NM_001172411	ENSG00000173218	VANGL1	KITENIN|LPP2|STB2|STBM2	vang-like 1 (van gogh, Drosophila)	protein-coding
chr1	28996145	28996314	intron (NM_024482, intron 1 of 9)	intron (NM_024482, intron 1 of 9)	989	NM_006582	10691	Hs.632373	NM_006582	ENSG00000162419	GMEB1	P96PIF|PIF96	glucocorticoid modulatory element binding protein 1	protein-coding
chr1	204686895	204687064	Intergenic	MIR3|SINE|MIR	-32382	NM_201630	10446	Hs.26312	NM_006338	ENSG00000170382	LRRN2	FIGLER7|GAC1|LRANK1|LRRN5	leucine rich repeat neuronal 2	protein-coding
chr1	198466465	198466634	Intergenic	(CATATA)n|Simple_repeat|Simple_repeat	43526	NM_133262	127124	Hs.127743	NM_133262	ENSG00000151418	ATP6V1G3	ATP6G3|Vma10	ATPase, H+ transporting, lysosomal 13kDa, V1 subunit G3	protein-coding
chr1	149680178	149680347	Intergenic	tRNA-Gly-GGG|tRNA|tRNA	-73988	NM_000566	2209	Hs.77424	NM_000566	ENSG00000150337	FCGR1A	CD64|CD64A|FCRI|IGFR1	Fc fragment of IgG, high affinity Ia, receptor (CD64)	protein-coding
chr1	202987886	202988055	intron (NM_138391, intron 6 of 7)	MLT1A1|LTR|ERVL-MaLR	11434	NM_001079809	653659	Hs.652908	NM_001079809		TMEM183B	C1orf37-DUP	transmembrane protein 183B	protein-coding
chr1	112095963	112096132	intron (NM_001081976, intron 1 of 5)	LTR40a|LTR|ERVL	10550	NM_001081976	140	Hs.281342	NM_000677	ENSG00000121933	ADORA3	A3AR|AD026|bA552M11.5	adenosine A3 receptor	protein-coding
chr1	24691797	24691966	TTS (NM_198174)	TTS (NM_198174)	42351	NM_021180	57822	Hs.657920	NM_001195010	ENSG00000158055	GRHL3	SOM|TFCP2L4	grainyhead-like 3 (Drosophila)	protein-coding
chr1	69421284	69421453	Intergenic	Intergenic	-458569	NM_001114120	55635	Hs.445098	NM_001114120	ENSG00000024526	DEPDC1	DEP.8|DEPDC1-V2|DEPDC1A|SDP35	DEP domain containing 1	protein-coding
chr1	15905658	15905827	intron (NM_024758, intron 3 of 6)	intron (NM_024758, intron 3 of 6)	5863	NM_024758	79814	Hs.461532	NM_024758	ENSG00000116771	AGMAT	-	agmatine ureohydrolase (agmatinase)	protein-coding
chr1	112435692	112435861	intron (NM_004980, intron 2 of 7)	L2c|LINE|L2	96001	NM_172198	3752	Hs.666367	NM_004980	ENSG00000171385	KCND3	KCND3L|KCND3S|KSHIVB|KV4.3	potassium voltage-gated channel, Shal-related subfamily, member 3	protein-coding
chr1	30095923	30096092	Intergenic	ERVL-E-int|LTR|ERVL	532979	NM_001195001	10076	Hs.19718	NM_001195001	ENSG00000060656	PTPRU	FMI|PCP-2|PTP|PTP-J|PTP-PI|PTP-RO|PTPPSI|PTPRO|PTPU2|R-PTP-PSI|R-PTP-U|hPTP-J	protein tyrosine phosphatase, receptor type, U	protein-coding
chr1	20821367	20821536	Intergenic	MIR3|SINE|MIR	-8723	NM_018584	55450	Hs.731383	NM_018584	ENSG00000162545	CAMK2N1	PRO1489|RP11-401M16.1	calcium/calmodulin-dependent protein kinase II inhibitor 1	protein-coding
chr1	79180997	79181166	Intergenic	Intergenic	65604	NM_006417	10561	Hs.82316	NM_006417	ENSG00000137965	IFI44	MTAP44|p44	interferon-induced protein 44	protein-coding
chr1	24621278	24621447	Intergenic	Intergenic	-24450	NM_198173	57822	Hs.657920	NM_001195010	ENSG00000158055	GRHL3	SOM|TFCP2L4	grainyhead-like 3 (Drosophila)	protein-coding
chr1	4859971	4860140	Intergenic	MIR|SINE|MIR	144950	NM_018836	55966	Hs.25924	NM_001042478	ENSG00000196581	AJAP1	MOT8|RP3-426F10.1|SHREW-1|SHREW1	adherens junctions associated protein 1	protein-coding
chr1	153447059	153447228	Intergenic	Intergenic	-14006	NM_002963	6278	Hs.112408	NM_002963	ENSG00000143556	S100A7	PSOR1|S100A7c	S100 calcium binding protein A7	protein-coding
chr1	4589533	4589702	Intergenic	Intergenic	117506	NR_027088	284661	Hs.278112	NR_027088		LOC284661	-	uncharacterized LOC284661	miscRNA
chr1	236064957	236065126	Intergenic	LTR16A1|LTR|ERVL	-34821	NM_000081	1130	Hs.532411	NM_000081	ENSG00000143669	LYST	CHS|CHS1	lysosomal trafficking regulator	protein-coding
chr1	204532723	204532892	Intergenic	MLT1I|LTR|ERVL-MaLR	47300	NR_024171	4194	Hs.497492	NM_001204171	ENSG00000198625	MDM4	HDMX|MDMX|MRP1	Mdm4 p53 binding protein homolog (mouse)	protein-coding
chr1	50674216	50674385	Intergenic	Intergenic	99706	NM_021952	1996	Hs.213050	NM_001144774	ENSG00000162374	ELAVL4	HUD|PNEM	ELAV (embryonic lethal, abnormal vision, Drosophila)-like 4	protein-coding
chr1	204412043	204412212	intron (NM_002646, intron 20 of 33)	MER91A|DNA|hAT-Tip100	-31183	NM_032833	84919	Hs.304376	NM_032833	ENSG00000158615	PPP1R15B	CREP	protein phosphatase 1, regulatory subunit 15B	protein-coding
chr1	36600001	36600170	Intergenic	Intergenic	15030	NR_073098	27095	Hs.523131	NM_001270894	ENSG00000054116	TRAPPC3	BET3	trafficking protein particle complex 3	protein-coding
chr1	55174720	55174889	intron (NR_037640, intron 23 of 32)	intron (NR_037640, intron 23 of 32)	-6691	NM_004623	7268	Hs.729029	NM_004623	ENSG00000243725	TTC4	-	tetratricopeptide repeat domain 4	protein-coding
chr1	203125928	203126097	intron (NM_000674, intron 3 of 3)	MSTD|LTR|ERVL-MaLR	18930	NM_004997	4608	Hs.927	NM_004997	ENSG00000133055	MYBPH	-	myosin binding protein H	protein-coding
chr1	229368248	229368417	Intergenic	MLT1J|LTR|ERVL-MaLR	-38547	NM_004578	5867	Hs.296169	NM_004578	ENSG00000168118	RAB4A	HRES-1/RAB4|RAB4	RAB4A, member RAS oncogene family	protein-coding
chr1	202664977	202665146	intron (NM_177402, intron 1 of 8)	intron (NM_177402, intron 1 of 8)	14490	NM_177402	127833	Hs.25422	NM_001136504	ENSG00000143858	SYT2	SytII	synaptotagmin II	protein-coding
chr1	51409731	51409900	intron (NM_007051, intron 1 of 18)	intron (NM_007051, intron 1 of 18)	16121	NM_007051	11124	Hs.530402	NM_007051	ENSG00000185104	FAF1	HFAF1s|UBXD12|UBXN3A|hFAF1	Fas (TNFRSF6) associated factor 1	protein-coding
chr1	203380062	203380231	Intergenic	Intergenic	-59857	NM_002023	2331	Hs.519168	NM_002023	ENSG00000122176	FMOD	SLRR2E	fibromodulin	protein-coding
chr1	23756878	23757047	intron (NM_017707, intron 24 of 24)	intron (NM_017707, intron 24 of 24)	-5701	NM_003196	6920	Hs.446354	NM_003196	ENSG00000204219	TCEA3	TFIIS|TFIIS.H	transcription elongation factor A (SII), 3	protein-coding
chr1	203609319	203609488	intron (NM_001001396, intron 1 of 21)	intron (NM_001001396, intron 1 of 21)	13488	NM_001684	493	Hs.733333	NM_001001396	ENSG00000058668	ATP2B4	ATP2B2|MXRA1|PMCA4|PMCA4b|PMCA4x	ATPase, Ca++ transporting, plasma membrane 4	protein-coding
chr1	22198199	22198368	intron (NM_005529, intron 33 of 96)	intron (NM_005529, intron 33 of 96)	59525	NM_001013693	401944	Hs.710255	NM_001013693	ENSG00000187942	LDLRAD2	-	low density lipoprotein receptor class A domain containing 2	protein-coding
chr1	76646252	76646421	intron (NM_152996, intron 1 of 4)	LTR1B|LTR|ERV1	105947	NM_001160011	256435	Hs.679096	NM_001160011	ENSG00000184005	ST6GALNAC3	PRO7177|SIAT7C|ST6GALNACIII|STY	ST6 (alpha-N-acetyl-neuraminyl-2,3-beta-galactosyl-1,3)-N-acetylgalactosaminide alpha-2,6-sialyltransferase 3	protein-coding
chr1	45022058	45022227	intron (NM_018150, intron 2 of 14)	intron (NM_018150, intron 2 of 14)	10977	NR_049849	100847089		NR_049849		MIR5584	-	microRNA 5584	miscRNA
chr1	203047260	203047429	3' UTR (NM_015053, exon 17 of 17)	3' UTR (NM_015053, exon 17 of 17)	7822	NM_002479	4656	Hs.2830	NM_002479	ENSG00000122180	MYOG	MYF4|bHLHc3|myf-4	myogenin (myogenic factor 4)	protein-coding
chr1	113162906	113163075	promoter-TSS (NM_017744)	promoter-TSS (NM_017744)	915	NM_006135	829	Hs.514934	NM_006135	ENSG00000116489	CAPZA1	CAPPA1|CAPZ|CAZ1	capping protein (actin filament) muscle Z-line, alpha 1	protein-coding
chr1	200639543	200639712	promoter-TSS (NM_001031725)	promoter-TSS (NM_001031725)	-501	NM_001031725	83479	Hs.497332	NM_031306	ENSG00000118197	DDX59	ZNHIT5	DEAD (Asp-Glu-Ala-Asp) box polypeptide 59	protein-coding
chr1	203434467	203434636	Intergenic	Intergenic	-10332	NM_002725	5549	Hs.632481	NM_002725	ENSG00000188783	PRELP	MST161|MSTP161|SLRR2A	proline/arginine-rich end leucine-rich repeat protein	protein-coding
chr1	5039957	5040126	Intergenic	L2a|LINE|L2	324936	NM_018836	55966	Hs.25924	NM_001042478	ENSG00000196581	AJAP1	MOT8|RP3-426F10.1|SHREW-1|SHREW1	adherens junctions associated protein 1	protein-coding
chr1	216633656	216633825	Intergenic	L2a|LINE|L2	-37002	NM_007123	7399	Hs.655974	NM_007123	ENSG00000042781	USH2A	RP39|US2|USH2|dJ1111A8.1	Usher syndrome 2A (autosomal recessive, mild)	protein-coding
chr1	111731464	111731633	intron (NM_024901, intron 9 of 11)	intron (NM_024901, intron 9 of 11)	11733	NM_024901	79961	Hs.557850	NM_024901	ENSG00000162777	DENND2D	RP5-1180E21.2	DENN/MADD domain containing 2D	protein-coding
chr1	44346075	44346244	intron (NR_073018, intron 6 of 10)	L2b|LINE|L2	-52833	NM_001136215	9048	Hs.632404	NM_001136215	ENSG00000117407	ARTN	ENOVIN|EVN|NBN	artemin	protein-coding
chr1	5323518	5323687	Intergenic	THE1B|LTR|ERVL-MaLR	-300529	NR_039612	100616489		NR_039612		MIR4417	-	microRNA 4417	miscRNA
chr1	32354882	32355051	Intergenic	Intergenic	30293	NM_001195100	8073	Hs.713025	NM_001195100	ENSG00000184007	PTP4A2	HH13|HH7-2|HU-PP-1|OV-1|PRL-2|PRL2|PTP4A|PTPCAAX2|ptp-IV1a|ptp-IV1b	protein tyrosine phosphatase type IVA, member 2	protein-coding
chr1	15682738	15682907	intron (NM_052929, intron 19 of 30)	LTR24|LTR|ERV1	-53569	NM_024329	79180	Hs.465374	NM_024329	ENSG00000142634	EFHD2	SWS1	EF-hand domain family, member D2	protein-coding
chr1	25486592	25486761	Intergenic	Intergenic	72337	NM_015484	25949	Hs.20013	NM_015484	ENSG00000117614	SYF2	CBPIN|NTC31|P29|fSAP29	SYF2 homolog, RNA splicing factor (S. cerevisiae)	protein-coding
chr1	20976766	20976935	intron (NM_032409, intron 7 of 7)	intron (NM_032409, intron 7 of 7)	11187	NM_005216	1650	Hs.523145	NM_005216	ENSG00000244038	DDOST	AGER1|CDG1R|OKSWcl45|OST|OST48|WBP1	dolichyl-diphosphooligosaccharide--protein glycosyltransferase	protein-coding
chr1	165894340	165894509	Intergenic	Intergenic	17266	NR_037431	100500832		NR_037431		MIR3658	-	microRNA 3658	miscRNA
chr1	120278845	120279014	intron (NM_006623, intron 7 of 11)	L2c|LINE|L2	24510	NM_006623	26227	Hs.487296	NM_006623	ENSG00000092621	PHGDH	3-PGDH|3PGDH|PDG|PGAD|PGD|PGDH|SERA	phosphoglycerate dehydrogenase	protein-coding
chr1	78470513	78470682	promoter-TSS (NM_007034)	promoter-TSS (NM_007034)	-39	NM_007034	11080	Hs.13852	NM_007034	ENSG00000162616	DNAJB4	DNAJW|DjB4|HLJ1	DnaJ (Hsp40) homolog, subfamily B, member 4	protein-coding
chr1	204181237	204181406	intron (NM_198447, intron 1 of 4)	L2a|LINE|L2	1899	NM_198447	127845	Hs.532401	NM_198447	ENSG00000174567	GOLT1A	CGI-141|GOT1|HMFN1187|RP11-203F10.3|YMR292W	golgi transport 1A	protein-coding
chr1	214378639	214378808	Intergenic	Intergenic	-75842	NM_020197	56950	Hs.66170	NM_020197	ENSG00000143499	SMYD2	HSKM-B|KMT3C|ZMYND14	SET and MYND domain containing 2	protein-coding
chr1	4432999	4433168	Intergenic	(CCCA)n|Simple_repeat|Simple_repeat	-39028	NR_027088	284661	Hs.278112	NR_027088		LOC284661	-	uncharacterized LOC284661	miscRNA
chr1	173447413	173447582	intron (NM_004905, intron 1 of 4)	intron (NM_004905, intron 1 of 4)	1011	NM_004905	9588	Hs.731505	NM_004905	ENSG00000117592	PRDX6	1-Cys|AOP2|NSGPx|PRX|aiPLA2|p29	peroxiredoxin 6	protein-coding
chr1	23801413	23801582	intron (NM_017707, intron 1 of 24)	intron (NM_017707, intron 1 of 24)	9253	NM_017707	55616	Hs.437379	NM_001143778	ENSG00000088280	ASAP3	ACAP4|CENTB6|DDEFL1|UPLC1	ArfGAP with SH3 domain, ankyrin repeat and PH domain 3	protein-coding
chr1	15011122	15011291	intron (NM_201628, intron 1 of 14)	MLT1D|LTR|ERVL-MaLR	85993	NM_201628	23254	Hs.368823	NM_001017999	ENSG00000189337	KAZN	KAZ	kazrin, periplakin interacting protein	protein-coding
chr1	203036354	203036523	intron (NM_015053, intron 12 of 16)	L2a|LINE|L2	16127	NM_015053	8497	Hs.153648	NM_015053	ENSG00000143847	PPFIA4	-	protein tyrosine phosphatase, receptor type, f polypeptide (PTPRF), interacting protein (liprin), alpha 4	protein-coding
chr1	85982344	85982513	intron (NM_001134445, intron 1 of 6)	MIR3|SINE|MIR	-51539	NM_012137	23576	Hs.731520	NM_001134445	ENSG00000153904	DDAH1	DDAH	dimethylarginine dimethylaminohydrolase 1	protein-coding
chr1	9471065	9471234	Intergenic	Intergenic	118208	NM_025106	80176	Hs.738680	NM_025106	ENSG00000171621	SPSB1	SSB-1|SSB1	splA/ryanodine receptor domain and SOCS box containing 1	protein-coding
chr1	28843910	28844079	promoter-TSS (NM_001048195)	promoter-TSS (NM_001048195)	-751	NM_001269	1104	Hs.469723	NM_001048194	ENSG00000180198	RCC1	CHC1|RCC1-I|SNHG3-RCC1	regulator of chromosome condensation 1	protein-coding
chr1	12457907	12458076	intron (NM_018156, intron 59 of 68)	L2a|LINE|L2	-109309	NR_003025	677885	Hs.721005	NR_003025		SNORA59A	ACA59	small nucleolar RNA, H/ACA box 59A	snoRNA
chr1	4419441	4419610	Intergenic	MIRc|SINE|MIR	-52586	NR_027088	284661	Hs.278112	NR_027088		LOC284661	-	uncharacterized LOC284661	miscRNA
chr1	236584368	236584537	intron (NM_080738, intron 3 of 5)	LTR53|LTR|ERVL	25736	NM_080738	128178	Hs.352224	NM_080738	ENSG00000186197	EDARADD	ED3|EDA3	EDAR-associated death domain	protein-coding
chr1	234691313	234691482	Intergenic	Intergenic	-23872	NR_038426	100506795	Hs.448989	NR_038426		LOC100506795	-	uncharacterized LOC100506795	miscRNA
chr1	100807000	100807169	Intergenic	THE1D|LTR|ERVL-MaLR	-10939	NM_003672	8556	Hs.127411	NM_003672	ENSG00000079335	CDC14A	cdc14|hCDC14	CDC14 cell division cycle 14 homolog A (S. cerevisiae)	protein-coding
chr1	203677074	203677243	exon (NM_001684, exon 10 of 21)	exon (NM_001684, exon 10 of 21)	-21551	NR_003019	677843	Hs.676135	NR_003019		SNORA77	ACA63	small nucleolar RNA, H/ACA box 77	snoRNA
chr1	120171067	120171236	intron (NM_001080470, intron 1 of 2)	intron (NM_001080470, intron 1 of 2)	19239	NM_001080470	90874	Hs.381105	NM_001080470	ENSG00000143067	ZNF697	-	zinc finger protein 697	protein-coding
chr1	95236033	95236202	Intergenic	Intergenic	-49781	NM_001258343	126969	Hs.483423	NM_001114106	ENSG00000143036	SLC44A3	CTL3	solute carrier family 44, member 3	protein-coding
chr1	52852208	52852377	intron (NM_001190819, intron 8 of 16)	intron (NM_001190819, intron 8 of 16)	17851	NM_001190819	4998	Hs.17908	NM_001190818	ENSG00000085840	ORC1	HSORC1|ORC1L|PARC1	origin recognition complex, subunit 1	protein-coding
chr1	42346822	42346991	intron (NR_038260, intron 1 of 2)	MIRb|SINE|MIR	37472	NM_024503	59269	Hs.648369	NM_001127714	ENSG00000127124	HIVEP3	KBP-1|KBP1|KRC|SHN3|Schnurri-3|ZAS3|ZNF40C	human immunodeficiency virus type I enhancer binding protein 3	protein-coding
chr1	85320155	85320324	intron (NM_012152, intron 2 of 2)	intron (NM_012152, intron 2 of 2)	38657	NM_012152	23566	Hs.674915	NM_012152	ENSG00000171517	LPAR3	EDG7|Edg-7|GPCR|HOFNH30|LP-A3|LPA3|RP4-678I3	lysophosphatidic acid receptor 3	protein-coding
chr1	6934785	6934954	intron (NR_038934, intron 3 of 3)	intron (NR_038934, intron 3 of 3)	89485	NR_038934	23261	Hs.671020	NM_001195563	ENSG00000171735	CAMTA1	CANPMR	calmodulin binding transcription activator 1	protein-coding
chr1	9783817	9783986	intron (NM_005026, intron 20 of 23)	MLT1H|LTR|ERVL-MaLR	-69257	NR_027045	644997	Hs.568595	NM_001045478		C1orf200	-	chromosome 1 open reading frame 200	miscRNA
chr1	229760760	229760929	intron (NM_014409, intron 1 of 4)	intron (NM_014409, intron 1 of 4)	950	NM_001025247	27097	Hs.270621	NM_001025247	ENSG00000135801	TAF5L	PAF65B	TAF5-like RNA polymerase II, p300/CBP-associated factor (PCAF)-associated factor, 65kDa	protein-coding
chr1	22719880	22720049	Intergenic	Intergenic	-58380	NM_014870	9923	Hs.418966	NM_001083621	ENSG00000184677	ZBTB40	ZNF923	zinc finger and BTB domain containing 40	protein-coding
chr1	44434339	44434508	TTS (NM_014652)	TTS (NM_014652)	-1230	NM_001384	1802	Hs.632398	NM_001039589	ENSG00000132768	DPH2	DPH2L2	DPH2 homolog (S. cerevisiae)	protein-coding
chr1	65823118	65823287	intron (NM_001256865, intron 2 of 19)	intron (NM_001256865, intron 2 of 19)	47984	NM_001256864	9829	Hs.647643	NM_001256864	ENSG00000116675	DNAJC6	DJC6	DnaJ (Hsp40) homolog, subfamily C, member 6	protein-coding
chr1	172903144	172903313	Intergenic	Intergenic	116875	NM_005092	8995	Hs.248197	NM_005092	ENSG00000120337	TNFSF18	AITRL|GITRL|TL6|hGITRL	tumor necrosis factor (ligand) superfamily, member 18	protein-coding
chr1	208004641	208004810	Intergenic	Intergenic	13001	NR_026817	148696	Hs.125511	NR_026817		LOC148696	-	uncharacterized LOC148696	miscRNA
chr1	65895553	65895722	exon (NM_017526, exon 3 of 4)	exon (NM_017526, exon 3 of 4)	9238	NM_001198681	54741	Hs.23581	NM_001198681	ENSG00000213625	LEPROT	LEPR|OB-RGRP|OBRGRP|VPS55	leptin receptor overlapping transcript	protein-coding
chr1	241576730	241576899	Intergenic	Intergenic	-56336	NM_002924	6000	Hs.655739	NM_002924	ENSG00000182901	RGS7	-	regulator of G-protein signaling 7	protein-coding
chr1	168601777	168601946	Intergenic	Intergenic	56150	NM_002995	6375	Hs.546295	NM_002995	ENSG00000143184	XCL1	ATAC|LPTN|LTN|SCM-1|SCM-1a|SCM1|SCM1A|SCYC1	chemokine (C motif) ligand 1	protein-coding
chr1	70622331	70622500	intron (NM_017768, intron 10 of 14)	MER44B|DNA|TcMar-Tigger	48946	NM_017768	55631	Hs.147836	NM_017768	ENSG00000066557	LRRC40	dJ677H15.1	leucine rich repeat containing 40	protein-coding
chr1	203768554	203768723	exon (NM_001174108, exon 1 of 1)	exon (NM_001174108, exon 1 of 1)	1987	NM_001174108	100381270	Hs.716666	NM_001174108	ENSG00000257315	ZBED6	MGR	zinc finger, BED-type containing 6	protein-coding
chr1	234700451	234700620	Intergenic	Intergenic	-33010	NR_038426	100506795	Hs.448989	NR_038426		LOC100506795	-	uncharacterized LOC100506795	miscRNA
chr1	5436570	5436739	Intergenic	MLT1E1A|LTR|ERVL-MaLR	-187477	NR_039612	100616489		NR_039612		MIR4417	-	microRNA 4417	miscRNA
chr1	52034785	52034954	Intergenic	Intergenic	-47677	NM_148909	114883	Hs.738830	NM_024586	ENSG00000117859	OSBPL9	ORP-9|ORP9	oxysterol binding protein-like 9	protein-coding
chr1	222826734	222826903	intron (NM_198551, intron 15 of 27)	intron (NM_198551, intron 15 of 27)	35374	NM_198551	375056	Hs.118474	NM_198551	ENSG00000154305	MIA3	ARNT|D320|TANGO|TANGO1|UNQ6077	melanoma inhibitory activity family, member 3	protein-coding
chr1	91564388	91564557	Intergenic	Intergenic	-76660	NM_032186	84146	Hs.741464	NM_016620	ENSG00000122482	ZNF644	BM-005|MYP21|NatF|ZEP-2	zinc finger protein 644	protein-coding
chr1	204681841	204682010	Intergenic	MIR|SINE|MIR	-27328	NM_201630	10446	Hs.26312	NM_006338	ENSG00000170382	LRRN2	FIGLER7|GAC1|LRANK1|LRRN5	leucine rich repeat neuronal 2	protein-coding
chr1	150577240	150577409	Intergenic	LTR78|LTR|ERV1	24285	NM_207045	2029	Hs.632456	NM_004436	ENSG00000143420	ENSA	ARPP-19e	endosulfine alpha	protein-coding
chr1	202253392	202253561	intron (NM_001017403, intron 6 of 17)	intron (NM_001017403, intron 6 of 17)	57618	NM_014176	29089	Hs.5199	NM_014176	ENSG00000077152	UBE2T	PIG50	ubiquitin-conjugating enzyme E2T (putative)	protein-coding
chr1	94169344	94169513	intron (NM_001261408, intron 3 of 13)	L2a|LINE|L2	-22034	NM_003567	8412	Hs.36958	NM_001261408	ENSG00000137936	BCAR3	NSP2|SH2D3B	breast cancer anti-estrogen resistance 3	protein-coding
chr1	79158168	79158337	Intergenic	Intergenic	42775	NM_006417	10561	Hs.82316	NM_006417	ENSG00000137965	IFI44	MTAP44|p44	interferon-induced protein 44	protein-coding
chr1	42247585	42247754	intron (NM_024503, intron 1 of 8)	intron (NM_024503, intron 1 of 8)	136709	NM_024503	59269	Hs.648369	NM_001127714	ENSG00000127124	HIVEP3	KBP-1|KBP1|KRC|SHN3|Schnurri-3|ZAS3|ZNF40C	human immunodeficiency virus type I enhancer binding protein 3	protein-coding
chr1	16402241	16402410	Intergenic	Intergenic	-2198	NM_182623	348487	Hs.126825	NM_182623	ENSG00000185519	FAM131C	C1orf117|RP11-5P18.9	family with sequence similarity 131, member C	protein-coding
chr1	32109704	32109873	intron (NM_012392, intron 1 of 4)	intron (NM_012392, intron 1 of 4)	430	NR_033688	553115	Hs.470417	NR_033688	ENSG00000162517	PEF1	ABP32|PEF1A	penta-EF-hand domain containing 1	protein-coding
chr1	34494978	34495147	intron (NM_052896, intron 3 of 69)	intron (NM_052896, intron 3 of 69)	136381	NM_052896	114784	Hs.656915	NM_052896	ENSG00000121904	CSMD2	dJ1007G16.1|dJ1007G16.2|dJ947L8.1	CUB and Sushi multiple domains 2	protein-coding
chr1	23748405	23748574	intron (NM_003196, intron 1 of 10)	intron (NM_003196, intron 1 of 10)	2772	NM_003196	6920	Hs.446354	NM_003196	ENSG00000204219	TCEA3	TFIIS|TFIIS.H	transcription elongation factor A (SII), 3	protein-coding
chr1	59523417	59523586	Intergenic	Intergenic	88978	NR_027120	729467	Hs.662291	NR_027120		HSD52	-	uncharacterized LOC729467	miscRNA
chr1	113278454	113278623	Intergenic	ERVL-E-int|LTR|ERVL	15349	NM_001004440	284467	Hs.439116	NM_001004440	ENSG00000184599	FAM19A3	TAFA-3|TAFA3	family with sequence similarity 19 (chemokine (C-C motif)-like), member A3	protein-coding
chr1	228741890	228742059	Intergenic	HSAT4|Satellite|centr	-38420	NR_037962	58480	Hs.647774	NM_021205	ENSG00000116574	RHOU	ARHU|CDC42L1|DJ646B12.2|WRCH1|fJ646B12.2|hG28K	ras homolog family member U	protein-coding
chr1	115600907	115601076	intron (NM_005725, intron 5 of 7)	intron (NM_005725, intron 5 of 7)	28576	NM_000549	7252	Hs.406687	NM_000549	ENSG00000134200	TSHB	TSH-B|TSH-BETA	thyroid stimulating hormone, beta	protein-coding
chr1	4491787	4491956	Intergenic	Intergenic	19760	NR_027088	284661	Hs.278112	NR_027088		LOC284661	-	uncharacterized LOC284661	miscRNA
chr1	208023895	208024064	Intergenic	Intergenic	32255	NR_026817	148696	Hs.125511	NR_026817		LOC148696	-	uncharacterized LOC148696	miscRNA
chr1	245986274	245986443	intron (NM_022743, intron 10 of 11)	intron (NM_022743, intron 10 of 11)	594356	NM_022743	64754	Hs.567571	NM_001167740	ENSG00000185420	SMYD3	KMT3E|ZMYND1|ZNFN3A1|bA74P14.1	SET and MYND domain containing 3	protein-coding
chr1	159403422	159403591	Intergenic	LTR16A1|LTR|ERVL	-6006	NM_012351	26476	Hs.532661	NM_012351	ENSG00000196184	OR10J1	HGMP07J|HSHGMP07J	olfactory receptor, family 10, subfamily J, member 1	protein-coding
chr1	12542177	12542346	intron (NM_018156, intron 66 of 68)	intron (NM_018156, intron 66 of 68)	-25039	NR_003025	677885	Hs.721005	NR_003025		SNORA59A	ACA59	small nucleolar RNA, H/ACA box 59A	snoRNA
chr1	18702530	18702699	intron (NM_032880, intron 6 of 9)	L2b|LINE|L2	-104810	NM_152375	127707	Hs.710799	NM_152375	ENSG00000179023	KLHDC7A	RP11-422P22.2	kelch domain containing 7A	protein-coding
chr1	65643353	65643522	intron (NM_203464, intron 2 of 5)	intron (NM_203464, intron 2 of 5)	29587	NM_013410	205	Hs.10862	NM_001005353	ENSG00000162433	AK4	AK3|AK3L1|AK3L2	adenylate kinase 4	protein-coding
chr1	145080993	145081162	Intergenic	Intergenic	-4891	NM_022359	9659	Hs.708687	NM_001002810	ENSG00000178104	PDE4DIP	CMYA2|MMGL	phosphodiesterase 4D interacting protein	protein-coding
chr1	65713293	65713462	Intergenic	MIRb|SINE|MIR	-17000	NM_001256865	9829	Hs.647643	NM_001256864	ENSG00000116675	DNAJC6	DJC6	DnaJ (Hsp40) homolog, subfamily C, member 6	protein-coding
chr1	7948036	7948205	Intergenic	Intergenic	-34569	NM_021995	10911	Hs.715862	NM_006786	ENSG00000049247	UTS2	PRO1068|U-II|UCN2|UII	urotensin 2	protein-coding
chr1	10900328	10900497	Intergenic	Intergenic	-43679	NM_017766	54897	Hs.439894	NM_001079843	ENSG00000130940	CASZ1	CAS11|CST|SRG|ZNF693|dJ734G22.1	castor zinc finger 1	protein-coding
chr1	43428720	43428889	intron (NR_033967, intron 1 of 3)	intron (NR_033967, intron 1 of 3)	-3957	NM_006516	6513	Hs.473721	NM_006516	ENSG00000117394	SLC2A1	DYT17|DYT18|GLUT|GLUT1|GLUT1DS|PED	solute carrier family 2 (facilitated glucose transporter), member 1	protein-coding
chr1	27288389	27288558	Intergenic	Intergenic	-1572	NM_152365	126695	Hs.188881	NM_152365	ENSG00000175707	C1orf172	RP11-344H11.3	chromosome 1 open reading frame 172	protein-coding
chr1	24777680	24777849	intron (NM_020448, intron 6 of 11)	L2c|LINE|L2	35519	NM_020448	57185	Hs.523442	NM_020448	ENSG00000001461	NIPAL3	DJ462O23.2|NPAL3	NIPA-like domain containing 3	protein-coding
chr1	23710409	23710578	intron (NM_003196, intron 10 of 10)	MIRc|SINE|MIR	-14136	NM_001077195	80818	Hs.293798	NM_001077195	ENSG00000125945	ZNF436	ZNF|Zfp46	zinc finger protein 436	protein-coding
chr1	77836769	77836938	intron (NM_174858, intron 6 of 13)	intron (NM_174858, intron 6 of 13)	88566	NM_012093	26289	Hs.597002	NM_012093	ENSG00000154027	AK5	AK6	adenylate kinase 5	protein-coding
chr1	34407811	34407980	intron (NM_052896, intron 3 of 69)	intron (NM_052896, intron 3 of 69)	73338	NR_038372	402779	Hs.666207	NR_038372		LOC402779	-	uncharacterized LOC402779	miscRNA
chr1	110539230	110539399	intron (NM_001242673, intron 1 of 16)	Tigger3b|DNA|TcMar-Tigger	-4235	NM_001242674	10768	Hs.741170	NM_001242673	ENSG00000168710	AHCYL1	DCAL|IRBIT|PRO0233|XPVKONA	adenosylhomocysteinase-like 1	protein-coding
chr1	116325719	116325888	Intergenic	Intergenic	-14377	NM_001232	845	Hs.57975	NM_001232	ENSG00000118729	CASQ2	PDIB2	calsequestrin 2 (cardiac muscle)	protein-coding
chr1	161265700	161265869	Intergenic	ERVL-E-int|LTR|ERVL	13978	NM_000530	4359	Hs.591486	NM_000530	ENSG00000158887	MPZ	CHM|CMT1|CMT1B|CMT2I|CMT2J|CMT4E|CMTDI3|CMTDID|DSS|HMSNIB|MPP|P0	myelin protein zero	protein-coding
chr1	202556648	202556817	3' UTR (NM_002481, exon 24 of 24)	3' UTR (NM_002481, exon 24 of 24)	47490	NM_001197131	4660	Hs.444403	NM_001167857	ENSG00000077157	PPP1R12B	MYPT2|PP1bp55	protein phosphatase 1, regulatory subunit 12B	protein-coding
chr1	32683217	32683386	intron (NM_019118, intron 3 of 4)	intron (NM_019118, intron 3 of 4)	4625	NM_019118	56063	Hs.272299	NM_019118	ENSG00000160055	TMEM234	AASL548|C1orf91|PRO1105|RP4-622L5|dJ622L5.7	transmembrane protein 234	protein-coding
chr1	22597688	22597857	Intergenic	Intergenic	-128253	NM_030761	54361	Hs.25766	NM_030761	ENSG00000162552	WNT4	SERKAL|WNT-4	wingless-type MMTV integration site family, member 4	protein-coding
chr1	17707822	17707991	intron (NM_207421, intron 5 of 16)	MIRc|SINE|MIR	9165	NM_207421	353238	Hs.531598	NM_207421		PADI6	-	peptidyl arginine deiminase, type VI	protein-coding
chr1	29164774	29164943	intron (NM_000911, intron 1 of 2)	intron (NM_000911, intron 1 of 2)	26204	NM_000911	4985	Hs.372	NM_000911	ENSG00000116329	OPRD1	OPRD	opioid receptor, delta 1	protein-coding
chr1	154843236	154843405	promoter-TSS (NM_001204087)	promoter-TSS (NM_001204087)	-566	NM_002249	3782	Hs.490765	NM_001204087	ENSG00000143603	KCNN3	KCa2.3|SK3|SKCA3|hSK3	potassium intermediate/small conductance calcium-activated channel, subfamily N, member 3	protein-coding
chr1	37349748	37349917	intron (NM_000831, intron 2 of 15)	intron (NM_000831, intron 2 of 15)	150012	NM_000831	2899	Hs.128848	NM_000831	ENSG00000163873	GRIK3	EAA5|GLR7|GLUR7|GluK3|GluR7a	glutamate receptor, ionotropic, kainate 3	protein-coding
chr1	23689284	23689453	exon (NM_001077195, exon 4 of 4)	exon (NM_001077195, exon 4 of 4)	5511	NM_030634	80818	Hs.293798	NM_001077195	ENSG00000125945	ZNF436	ZNF|Zfp46	zinc finger protein 436	protein-coding
chr1	213646693	213646862	Intergenic	Intergenic	422189	NM_001136138	26750	Hs.591416	NM_001136138	ENSG00000136643	RPS6KC1	RPK118|humS6PKh1	ribosomal protein S6 kinase, 52kDa, polypeptide 1	protein-coding
chr1	30501840	30502009	Intergenic	MER117|DNA|hAT-Charlie	-689695	NR_034182	100129196	Hs.659751	NR_034182		MATN1-AS1	-	MATN1 antisense RNA 1	miscRNA
chr1	227051236	227051405	Intergenic	Intergenic	-6953	NM_012486	5664	Hs.25363	NM_000447	ENSG00000143801	PSEN2	AD3L|AD4|CMD1V|PS2|STM2	presenilin 2 (Alzheimer disease 4)	protein-coding
chr1	4455319	4455488	Intergenic	MLT1A0|LTR|ERVL-MaLR	-16708	NR_027088	284661	Hs.278112	NR_027088		LOC284661	-	uncharacterized LOC284661	miscRNA
chr1	31701346	31701515	intron (NM_024522, intron 1 of 6)	intron (NM_024522, intron 1 of 6)	11304	NM_024522	79570	Hs.470259	NM_024522	ENSG00000084628	NKAIN1	FAM77C	Na+/K+ transporting ATPase interacting 1	protein-coding
chr1	24618379	24618548	Intergenic	L2b|LINE|L2	-27349	NM_198173	57822	Hs.657920	NM_001195010	ENSG00000158055	GRHL3	SOM|TFCP2L4	grainyhead-like 3 (Drosophila)	protein-coding
chr1	68850678	68850847	Intergenic	MER41B|LTR|ERV1	64880	NM_000329	6121	Hs.2133	NM_000329	ENSG00000116745	RPE65	LCA2|RP20|mRPE65|rd12|sRPE65	retinal pigment epithelium-specific protein 65kDa	protein-coding
chr1	17234395	17234564	Intergenic	Intergenic	-13966	NM_014675	9696	Hs.309403	NM_014675	ENSG00000058453	CROCC	ROLT	ciliary rootlet coiled-coil, rootletin	protein-coding
chr1	11313449	11313618	intron (NM_004958, intron 6 of 57)	L2a|LINE|L2	9075	NM_004958	2475	Hs.338207	NM_004958	ENSG00000198793	MTOR	FRAP|FRAP1|FRAP2|RAFT1|RAPT1	mechanistic target of rapamycin (serine/threonine kinase)	protein-coding
chr1	187660713	187660882	Intergenic	L1MC1|LINE|L1	862765	NM_024420	5321	Hs.497200	NM_024420	ENSG00000116711	PLA2G4A	PLA2G4|cPLA2-alpha	phospholipase A2, group IVA (cytosolic, calcium-dependent)	protein-coding
chr1	201314747	201314916	Intergenic	Plat_L3|LINE|CR1	31974	NM_001001431	7139	Hs.533613	NM_000364	ENSG00000118194	TNNT2	CMH2|CMPD2|LVNC6|RCM3|TnTC|cTnT	troponin T type 2 (cardiac)	protein-coding
chr1	219262421	219262590	intron (NR_038845, intron 3 of 4)	L1MA4|LINE|L1	84625	NR_038845	643723	Hs.519774	NR_038845		LOC643723	-	uncharacterized LOC643723	miscRNA
chr1	234840480	234840649	Intergenic	L2c|LINE|L2	-19225	NR_038856	100506810	Hs.586634	NR_038856		LOC100506810	-	uncharacterized LOC100506810	miscRNA
chr1	247905673	247905842	Intergenic	Intergenic	15951	NM_012353	26188	Hs.381306	NM_012353	ENSG00000221888	OR1C1	HSTPCR27|OR1-42|OR1.5.10|ORL211|TPCR27	olfactory receptor, family 1, subfamily C, member 1	protein-coding
chr1	65940974	65941143	intron (NM_001003680, intron 2 of 19)	intron (NM_001003680, intron 2 of 19)	-50314	NM_001198687	3953	Hs.723178	NM_001003679	ENSG00000116678	LEPR	CD295|LEP-R|OB-R|OBR	leptin receptor	protein-coding
chr1	59407458	59407627	Intergenic	Intergenic	156719	NR_034015	100131060	Hs.680604	NR_034014		LOC100131060	-	uncharacterized LOC100131060	miscRNA
chr1	203266442	203266611	Intergenic	Intergenic	7927	NR_034151	730227	Hs.293928	NR_034150		LOC730227	-	uncharacterized LOC730227	miscRNA
chr1	24535517	24535686	intron (NR_027087, intron 2 of 2)	intron (NR_027087, intron 2 of 2)	8871	NR_027087	284632	Hs.638906	NR_027087		LOC284632	-	uncharacterized LOC284632	miscRNA
chr1	119544873	119545042	Intergenic	Intergenic	-12778	NM_152380	6913	Hs.146196	NM_152380	ENSG00000092607	TBX15	TBX14	T-box 15	protein-coding
chr1	41388620	41388789	Intergenic	Intergenic	-56303	NM_001905	1503	Hs.473087	NM_001905	ENSG00000171793	CTPS1	CTPS	CTP synthase 1	protein-coding
chr1	24917509	24917678	intron (NM_001010980, intron 1 of 3)	intron (NM_001010980, intron 1 of 3)	35026	NM_001010980	400746	Hs.200253	NM_001010980	ENSG00000184454	NCMAP	C1orf130|MP11	noncompact myelin associated protein	protein-coding
chr1	156203903	156204072	intron (NM_001199663, intron 3 of 5)	intron (NM_001199663, intron 3 of 5)	-7964	NM_199173	632	Hs.654541	NM_199173	ENSG00000242252	BGLAP	BGP|OC	bone gamma-carboxyglutamate (gla) protein	protein-coding
chr1	156592886	156593055	intron (NM_021817, intron 2 of 6)	L2|LINE|L2	3884	NM_021817	60484	Hs.410719	NM_021817	ENSG00000132702	HAPLN2	BRAL1	hyaluronan and proteoglycan link protein 2	protein-coding
chr1	160349527	160349696	Intergenic	L2c|LINE|L2	12750	NM_005598	4807	Hs.30956	NM_005598	ENSG00000171786	NHLH1	HEN1|NSCL|NSCL1|bHLHa35	nescient helix loop helix 1	protein-coding
chr1	44281644	44281813	intron (NM_001270462, intron 3 of 7)	intron (NM_001270462, intron 3 of 7)	108524	NM_174967	6487	Hs.597915	NM_001270459	ENSG00000126091	ST3GAL3	MRT12|SIAT6|ST3GALII|ST3GalIII|ST3N	ST3 beta-galactoside alpha-2,3-sialyltransferase 3	protein-coding
chr1	204305526	204305695	intron (NM_014935, intron 1 of 22)	intron (NM_014935, intron 1 of 22)	23447	NM_014935	22874	Hs.253146	NM_138480	ENSG00000143850	PLEKHA6	PEPP-3|PEPP3	pleckstrin homology domain containing, family A member 6	protein-coding
chr1	17339234	17339403	promoter-TSS (NM_001141974)	promoter-TSS (NM_001141974)	-895	NM_001141974	23400	Hs.128866	NM_001141973	ENSG00000159363	ATP13A2	CLN12|HSA9947|KRPPD|PARK9	ATPase type 13A2	protein-coding
chr1	28325616	28325785	intron (NM_001990, intron 12 of 17)	intron (NM_001990, intron 12 of 17)	39196	NM_018053	55113	Hs.55024	NM_018053	ENSG00000158156	XKR8	RP11-460I13.3|XRG8	XK, Kell blood group complex subunit-related family, member 8	protein-coding
chr1	145747943	145748112	intron (NM_001201325, intron 2 of 8)	intron (NM_001201325, intron 2 of 8)	20361	NM_001201326	5174	Hs.732345	NM_001201325	ENSG00000174827	PDZK1	CAP70|CLAMP|NHERF-3|NHERF3|PDZD1	PDZ domain containing 1	protein-coding
chr1	29623875	29624044	intron (NM_133178, intron 15 of 29)	MIRb|SINE|MIR	60931	NM_001195001	10076	Hs.19718	NM_001195001	ENSG00000060656	PTPRU	FMI|PCP-2|PTP|PTP-J|PTP-PI|PTP-RO|PTPPSI|PTPRO|PTPU2|R-PTP-PSI|R-PTP-U|hPTP-J	protein tyrosine phosphatase, receptor type, U	protein-coding
chr1	235114393	235114562	Intergenic	Intergenic	176775	NR_002956	677802	Hs.533192	NR_002956		SNORA14B	ACA14b	small nucleolar RNA, H/ACA box 14B	snoRNA
chr1	41391262	41391431	Intergenic	Intergenic	-53661	NM_001905	1503	Hs.473087	NM_001905	ENSG00000171793	CTPS1	CTPS	CTP synthase 1	protein-coding
chr1	202544939	202545108	intron (NM_032104, intron 12 of 12)	intron (NM_032104, intron 12 of 12)	35781	NM_001197131	4660	Hs.444403	NM_001167857	ENSG00000077157	PPP1R12B	MYPT2|PP1bp55	protein phosphatase 1, regulatory subunit 12B	protein-coding
chr1	170677248	170677417	intron (NM_006902, intron 1 of 4)	intron (NM_006902, intron 1 of 4)	44019	NM_022716	5396	Hs.283416	NM_006902	ENSG00000116132	PRRX1	AGOTC|PHOX1|PMX1|PRX-1|PRX1	paired related homeobox 1	protein-coding
chr1	230185998	230186167	Intergenic	MIRc|SINE|MIR	-16874	NM_004481	2590	Hs.731416	NM_004481	ENSG00000143641	GALNT2	GalNAc-T2	UDP-N-acetyl-alpha-D-galactosamine:polypeptide N-acetylgalactosaminyltransferase 2 (GalNAc-T2)	protein-coding
chr1	162726339	162726508	intron (NM_006182, intron 7 of 17)	intron (NM_006182, intron 7 of 17)	-34073	NM_016371	51478	Hs.492925	NM_016371	ENSG00000132196	HSD17B7	PRAP|SDR37C1	hydroxysteroid (17-beta) dehydrogenase 7	protein-coding
chr1	203420706	203420875	Intergenic	Intergenic	-24093	NM_002725	5549	Hs.632481	NM_002725	ENSG00000188783	PRELP	MST161|MSTP161|SLRR2A	proline/arginine-rich end leucine-rich repeat protein	protein-coding
chr1	202690687	202690856	Intergenic	Intergenic	-11220	NM_177402	127833	Hs.25422	NM_001136504	ENSG00000143858	SYT2	SytII	synaptotagmin II	protein-coding
chr1	15619488	15619657	intron (NM_052929, intron 4 of 30)	MLT1F1|LTR|ERVL-MaLR	45804	NM_052929	114827	Hs.659997	NM_052929	ENSG00000142621	FHAD1	-	forkhead-associated (FHA) phosphopeptide binding domain 1	protein-coding
chr1	221507143	221507312	non-coding (NR_024236, exon 2 of 2)	non-coding (NR_024236, exon 2 of 2)	2411	NR_024236	400804	Hs.722626	NR_024236		C1orf140	-	uncharacterized LOC400804	miscRNA
chr1	56076857	56077026	Intergenic	AluJb|SINE|Alu	385627	NR_039618	100616272		NR_039618		MIR4422	-	microRNA 4422	miscRNA
chr1	18277743	18277912	Intergenic	MIR|SINE|MIR	-156413	NM_032880	84966	Hs.212511	NM_032880	ENSG00000117154	IGSF21	-	immunoglobin superfamily, member 21	protein-coding
chr1	203702303	203702472	exon (NM_001001396, exon 21 of 22)	exon (NM_001001396, exon 21 of 22)	2682	NR_046213	84719	Hs.661178	NM_032633		LINC00260	C1orf217|NCRNA00260	long intergenic non-protein coding RNA 260	miscRNA
chr1	20242581	20242750	Intergenic	Intergenic	7445	NM_014589	30814	Hs.272372	NM_014589	ENSG00000188784	PLA2G2E	-	phospholipase A2, group IIE	protein-coding
chr1	93367162	93367331	intron (NM_001252270, intron 1 of 3)	L1MA5|LINE|L1	-24539	NM_001252271	388650	Hs.180946	NM_001006605	ENSG00000154511	FAM69A	-	family with sequence similarity 69, member A	protein-coding
chr1	12665132	12665301	intron (NM_004753, intron 1 of 5)	intron (NM_004753, intron 1 of 5)	12604	NM_004753	9249	Hs.289347	NM_004753	ENSG00000162496	DHRS3	DD83.1|RDH17|Rsdr1|SDR1|SDR16C1|retSDR1	dehydrogenase/reductase (SDR family) member 3	protein-coding
chr1	204158253	204158422	Intergenic	Intergenic	7282	NM_002256	3814	Hs.95008	NM_002256	ENSG00000170498	KISS1	HH13|KiSS-1	KiSS-1 metastasis-suppressor	protein-coding
chr1	17914251	17914420	intron (NM_001011722, intron 2 of 26)	intron (NM_001011722, intron 2 of 26)	7287	NM_001011722	55160	Hs.443460	NM_001011722	ENSG00000074964	ARHGEF10L	GrinchGEF	Rho guanine nucleotide exchange factor (GEF) 10-like	protein-coding
chr1	210827204	210827373	intron (NM_018194, intron 11 of 11)	intron (NM_018194, intron 11 of 11)	324648	NM_001170580	55733	Hs.58650	NM_001122834	ENSG00000054392	HHAT	MART2|SKI1|Skn	hedgehog acyltransferase	protein-coding
chr1	46264141	46264310	Intergenic	MLT1H2|LTR|ERVL-MaLR	-5060	NM_015112	23139	Hs.319481	NM_015112	ENSG00000086015	MAST2	MAST205|MTSSK	microtubule associated serine/threonine kinase 2	protein-coding
chr1	23337407	23337576	exon (NM_001242521, exon 3 of 3)	exon (NM_001242521, exon 3 of 3)	4852	NM_001242521	729059	Hs.236896	NM_001242521	ENSG00000227868	LOC729059	-	uncharacterized LOC729059	protein-coding
chr1	114643432	114643601	intron (NM_001270805, intron 4 of 7)	intron (NM_001270805, intron 4 of 7)	51546	NM_205848	148281	Hs.736999	NM_001270805	ENSG00000134207	SYT6	sytVI	synaptotagmin VI	protein-coding
chr1	44009139	44009308	intron (NM_130440, intron 2 of 32)	intron (NM_130440, intron 2 of 32)	12676	NM_130440	5792	Hs.272062	NM_002840	ENSG00000142949	PTPRF	LAR	protein tyrosine phosphatase, receptor type, F	protein-coding
chr1	222131646	222131815	Intergenic	LTR7C|LTR|ERV1	-216214	NM_144729	11221	Hs.732301	NM_007207	ENSG00000143507	DUSP10	MKP-5|MKP5	dual specificity phosphatase 10	protein-coding
chr1	170677240	170677409	intron (NM_006902, intron 1 of 4)	intron (NM_006902, intron 1 of 4)	44011	NM_022716	5396	Hs.283416	NM_006902	ENSG00000116132	PRRX1	AGOTC|PHOX1|PMX1|PRX-1|PRX1	paired related homeobox 1	protein-coding
chr1	112786840	112787009	Intergenic	Intergenic	-151876	NM_018704	55917	Hs.731817	NM_018704	ENSG00000143079	CTTNBP2NL	-	CTTNBP2 N-terminal like	protein-coding
chr1	203496468	203496637	Intergenic	Intergenic	33281	NM_014359	26254	Hs.632468	NM_014359	ENSG00000188770	OPTC	OPT	opticin	protein-coding
chr1	28039142	28039311	Intergenic	Zaphod|DNA|hAT-Tip100	-13264	NM_152660	199870	Hs.469359	NM_001143912	ENSG00000009780	FAM76A	-	family with sequence similarity 76, member A	protein-coding
chr1	27099440	27099609	intron (NM_006015, intron 14 of 19)	intron (NM_006015, intron 14 of 19)	-14930	NM_017837	55650	Hs.732254	NM_001202554	ENSG00000060642	PIGV	GPI-MT-II|HPMRS1|PIG-V	phosphatidylinositol glycan anchor biosynthesis, class V	protein-coding
chr1	45973669	45973838	intron (NM_015506, intron 2 of 3)	intron (NM_015506, intron 2 of 3)	7897	NM_015506	25974	Hs.13024	NM_015506	ENSG00000132763	MMACHC	RP11-291L19.3|cblC	methylmalonic aciduria (cobalamin deficiency) cblC type, with homocystinuria	protein-coding
chr1	81272727	81272896	Intergenic	L2a|LINE|L2	-993271	NM_012302	23266	Hs.649282	NM_012302	ENSG00000117114	LPHN2	CIRL2|CL2|LEC1|LPHH1	latrophilin 2	protein-coding
chr1	145476114	145476283	promoter-TSS (NM_153713)	promoter-TSS (NM_153713)	-887	NM_153713	128077	Hs.740619	NM_153713	ENSG00000152022	LIX1L	-	Lix1 homolog (mouse)-like	protein-coding
chr1	117660528	117660697	intron (NM_001145635, intron 2 of 5)	intron (NM_001145635, intron 2 of 5)	3799	NM_001145635	80263	Hs.301526	NM_001145635	ENSG00000134253	TRIM45	RNF99	tripartite motif containing 45	protein-coding
chr1	119879819	119879988	Intergenic	Intergenic	-31499	NM_016527	51179	Hs.659767	NM_001005783	ENSG00000116882	HAO2	GIG16|HAOX2	hydroxyacid oxidase 2 (long chain)	protein-coding
chr1	204106683	204106852	intron (NM_018208, intron 5 of 7)	MIR3|SINE|MIR	14540	NM_018208	55224	Hs.497469	NM_018208	ENSG00000143845	ETNK2	EKI2|HMFT1716	ethanolamine kinase 2	protein-coding
chr1	11969645	11969814	Intergenic	Intergenic	16756	NM_138346	90231	Hs.520094	NM_138346	ENSG00000116685	KIAA2013	-	KIAA2013	protein-coding
chr1	203122972	203123141	intron (NM_000674, intron 3 of 3)	intron (NM_000674, intron 3 of 3)	21886	NM_004997	4608	Hs.927	NM_004997	ENSG00000133055	MYBPH	-	myosin binding protein H	protein-coding
chr1	46653864	46654033	TTS (NM_001243766)	TTS (NM_001243766)	10173	NM_017739	55624	Hs.525134	NM_001243766	ENSG00000085998	POMGNT1	GNTI.2|GnT I.2|LGMD2O|MDDGA3|MDDGB3|MDDGC3|MEB|MGAT1.2|gnT-I.2	protein O-linked mannose beta1,2-N-acetylglucosaminyltransferase	protein-coding
chr1	23872192	23872361	Intergenic	Intergenic	14009	NM_002167	3399	Hs.76884	NM_002167	ENSG00000117318	ID3	HEIR-1|bHLHb25	inhibitor of DNA binding 3, dominant negative helix-loop-helix protein	protein-coding
chr1	203842513	203842682	Intergenic	Intergenic	11857	NM_003094	6635	Hs.654418	NM_003094	ENSG00000182004	SNRPE	B-raf|SME|Sm-E	small nuclear ribonucleoprotein polypeptide E	protein-coding
chr1	4487787	4487956	Intergenic	(CATA)n|Simple_repeat|Simple_repeat	15760	NR_027088	284661	Hs.278112	NR_027088		LOC284661	-	uncharacterized LOC284661	miscRNA
chr1	203553623	203553792	Intergenic	Intergenic	-42208	NM_001001396	493	Hs.733333	NM_001001396	ENSG00000058668	ATP2B4	ATP2B2|MXRA1|PMCA4|PMCA4b|PMCA4x	ATPase, Ca++ transporting, plasma membrane 4	protein-coding
chr1	205201461	205201630	intron (NM_001242925, intron 1 of 4)	intron (NM_001242925, intron 1 of 4)	3486	NM_001242925	9911	Hs.6360	NM_001242925	ENSG00000133069	TMCC2	HUCEP11	transmembrane and coiled-coil domain family 2	protein-coding
chr1	41781356	41781525	Intergenic	Intergenic	-73625	NM_001172219	22955	Hs.571874	NM_001031694	ENSG00000010803	SCMH1	Scml3	sex comb on midleg homolog 1 (Drosophila)	protein-coding
chr1	118384180	118384349	Intergenic	Intergenic	88038	NM_017686	54834	Hs.594430	NM_001135589	ENSG00000196505	GDAP2	MACROD3|dJ776P7.1	ganglioside induced differentiation associated protein 2	protein-coding
chr1	39844039	39844208	intron (NM_012090, intron 48 of 94)	intron (NM_012090, intron 48 of 94)	-31053	NM_015038	643314	Hs.658760	NM_015038	ENSG00000255103	KIAA0754	-	KIAA0754	protein-coding
chr1	2861488	2861657	Intergenic	(TG)n|Simple_repeat|Simple_repeat	-76474	NM_080431	140625	Hs.236635	NM_080431	ENSG00000169717	ACTRT2	ARPM2|ARPT2|Arp-T2|HARPM2	actin-related protein T2	protein-coding
chr1	228104113	228104282	Intergenic	(CATG)n|Simple_repeat|Simple_repeat	25187	NR_049806	100847072		NR_049806		MIR5008	-	microRNA 5008	miscRNA
chr1	205263629	205263798	Intergenic	Intergenic	27170	NM_030952	81788	Hs.497512	NM_030952	ENSG00000163545	NUAK2	SNARK	NUAK family, SNF1-like kinase, 2	protein-coding
chr1	149298544	149298713	Intergenic	Intergenic	19152	NR_027002	388692	Hs.728022	NR_027002		LOC388692	-	uncharacterized LOC388692	miscRNA
chr1	10570758	10570927	intron (NM_004565, intron 2 of 8)	intron (NM_004565, intron 2 of 8)	35839	NM_004565	5195	Hs.149983	NM_004565	ENSG00000142655	PEX14	NAPP2|Pex14p|dJ734G22.2	peroxisomal biogenesis factor 14	protein-coding
chr1	207097532	207097701	Intergenic	(TG)n|Simple_repeat|Simple_repeat	-2238	NM_005449	9214	Hs.741469	NM_001142472	ENSG00000162894	FAIM3	FCMR|TOSO	Fas apoptotic inhibitory molecule 3	protein-coding
chr1	204911504	204911673	intron (NM_001005388, intron 2 of 29)	L2c|LINE|L2	-1766	NM_001160331	23114	Hs.13349	NM_001005388	ENSG00000163531	NFASC	NF|NRCAML	neurofascin	protein-coding
chr1	54983067	54983236	Intergenic	(TG)n|Simple_repeat|Simple_repeat	-30656	NM_015547	26027	Hs.234786	NM_015547	ENSG00000162390	ACOT11	BFIT|STARD14|THEA|THEM1	acyl-CoA thioesterase 11	protein-coding
chr1	52863295	52863464	exon (NM_001190819, exon 4 of 17)	exon (NM_001190819, exon 4 of 17)	6764	NM_001190819	4998	Hs.17908	NM_001190818	ENSG00000085840	ORC1	HSORC1|ORC1L|PARC1	origin recognition complex, subunit 1	protein-coding
chr1	228918388	228918557	Intergenic	(TG)n|Simple_repeat|Simple_repeat	47648	NM_021205	58480	Hs.647774	NM_021205	ENSG00000116574	RHOU	ARHU|CDC42L1|DJ646B12.2|WRCH1|fJ646B12.2|hG28K	ras homolog family member U	protein-coding
chr1	115599231	115599400	intron (NM_005725, intron 6 of 7)	L2c|LINE|L2	26900	NM_000549	7252	Hs.406687	NM_000549	ENSG00000134200	TSHB	TSH-B|TSH-BETA	thyroid stimulating hormone, beta	protein-coding
chr1	94313086	94313255	promoter-TSS (NM_001261408)	promoter-TSS (NM_001261408)	-464	NM_001261408	8412	Hs.36958	NM_001261408	ENSG00000137936	BCAR3	NSP2|SH2D3B	breast cancer anti-estrogen resistance 3	protein-coding
chr1	88369085	88369254	Intergenic	Intergenic	-531831	NR_038324	100505768	Hs.125247	NR_038324		LOC100505768	-	uncharacterized LOC100505768	miscRNA
chr1	41890010	41890179	Intergenic	(TG)n|Simple_repeat|Simple_repeat	60250	NM_001956	1907	Hs.1407	NM_001956	ENSG00000127129	EDN2	ET2|PPET2	endothelin 2	protein-coding
chr1	192515192	192515361	Intergenic	Intergenic	-29581	NM_002922	5996	Hs.75256	NM_002922	ENSG00000090104	RGS1	1R20|BL34|IER1|IR20	regulator of G-protein signaling 1	protein-coding
chr1	27623775	27623944	intron (NM_015023, intron 11 of 15)	intron (NM_015023, intron 11 of 15)	-24777	NM_032125	84065	Hs.469171	NM_032125	ENSG00000186501	TMEM222	C1orf160	transmembrane protein 222	protein-coding
chr10	78923805	78923974	intron (NM_001014797, intron 5 of 28)	intron (NM_001014797, intron 5 of 28)	473688	NM_002247	3778	Hs.144795	NM_001014797	ENSG00000156113	KCNMA1	BKTM|KCa1.1|MaxiK|SAKCA|SLO|SLO-ALPHA|SLO1|bA205K10.1|mSLO1	potassium large conductance calcium-activated channel, subfamily M, alpha member 1	protein-coding
chr10	33526986	33527155	intron (NM_001244972, intron 6 of 16)	intron (NM_001244972, intron 6 of 16)	96763	NM_001244972	8829	Hs.653996	NM_001024628	ENSG00000099250	NRP1	BDCA4|CD304|NP1|NRP|VEGF165R	neuropilin 1	protein-coding
chr10	121106719	121106888	intron (NM_005308, intron 2 of 15)	(TG)n|Simple_repeat|Simple_repeat	-30681	NR_039829	100616398		NR_039829		MIR4681	-	microRNA 4681	miscRNA
chr10	104534224	104534393	intron (NM_001083913, intron 1 of 3)	intron (NM_001083913, intron 1 of 3)	-1580	NM_017787	54838	Hs.693257	NM_001083913	ENSG00000166272	WBP1L	C10orf26|OPA1L|OPAL1	WW domain binding protein 1-like	protein-coding
chr10	50348056	50348225	intron (NR_038973, intron 2 of 5)	intron (NR_038973, intron 2 of 5)	-6075	NM_001164484	170370	Hs.646291	NM_001164484	ENSG00000172538	FAM170B	C10orf73	family with sequence similarity 170, member B	protein-coding
chr10	35698239	35698408	intron (NM_145012, intron 1 of 9)	intron (NM_145012, intron 1 of 9)	72521	NM_145012	219771	Hs.714184	NM_145012	ENSG00000108100	CCNY	C10orf9|CBCP1|CCNX|CFP1	cyclin Y	protein-coding
chr10	127751133	127751302	intron (NM_021641, intron 14 of 18)	intron (NM_021641, intron 14 of 18)	166109	NM_145235	92565	Hs.352591	NM_145235	ENSG00000203780	FANK1	-	fibronectin type III and ankyrin repeat domains 1	protein-coding
chr10	127941881	127942050	intron (NM_021641, intron 3 of 18)	intron (NM_021641, intron 3 of 18)	135162	NM_003474	8038	Hs.594351	NM_003474	ENSG00000148848	ADAM12	MCMP|MCMPMltna|MLTN|MLTNA	ADAM metallopeptidase domain 12	protein-coding
chr10	121281523	121281692	intron (NM_001005339, intron 3 of 4)	intron (NM_001005339, intron 3 of 4)	14438	NM_002925	6001	Hs.501200	NM_001005339	ENSG00000148908	RGS10	-	regulator of G-protein signaling 10	protein-coding
chr10	47076219	47076388	Intergenic	L1MC4|LINE|L1	-7231	NM_005972	5540	Hs.524719	NM_005972	ENSG00000204174	PPYR1	NPY4-R|NPY4R|PP1|Y4	pancreatic polypeptide receptor 1	protein-coding
chr10	42661326	42661495	Intergenic	(GAATG)n|Satellite|Satellite	202083	NR_024380	441666	Hs.255729	NR_024380		LOC441666	-	zinc finger protein 91 pseudogene	pseudo
chr10	120228984	120229153	Intergenic	Intergenic	126092	NM_004248	2834	Hs.248119	NM_004248	ENSG00000119973	PRLHR	GPR10|GR3|PrRPR	prolactin releasing hormone receptor	protein-coding
chr10	92079363	92079532	Intergenic	Intergenic	490197	NR_038382	643529	Hs.618956	NR_038382		LOC643529	-	hCG2024094	miscRNA
chr10	33526963	33527132	intron (NM_001244972, intron 6 of 16)	intron (NM_001244972, intron 6 of 16)	96786	NM_001244972	8829	Hs.653996	NM_001024628	ENSG00000099250	NRP1	BDCA4|CD304|NP1|NRP|VEGF165R	neuropilin 1	protein-coding
chr10	1541778	1541947	intron (NM_018702, intron 1 of 9)	(CTCA)n|Simple_repeat|Simple_repeat	-26963	NR_033387	642394	Hs.568831	NR_033387		ADARB2-AS1	C10orf109|NCRNA00168|bA466B20.1	ADARB2 antisense RNA 1	miscRNA
chr10	5359574	5359743	Intergenic	Intergenic	-47318	NM_053049	114131	Hs.511775	NM_053049	ENSG00000178473	UCN3	SCP|SPC|UCNIII	urocortin 3 (stresscopin)	protein-coding
chr10	128148730	128148899	intron (NM_001004298, intron 5 of 8)	L2c|LINE|L2	61196	NM_001004298	118611	Hs.587663	NM_001004298	ENSG00000154493	C10orf90	FATS|bA422P15.2	chromosome 10 open reading frame 90	protein-coding
chr10	39144040	39144209	Intergenic	(GAATG)n|Satellite|Satellite	154397	NR_045000	399746	Hs.742607	NR_045000		ACTR3BP5	FKSG74	ARP3 actin-related protein 3 homolog B (yeast) pseudogene 5	pseudo
chr10	125076755	125076924	Intergenic	Intergenic	163079	NM_004725	9184	Hs.418533	NM_001007793	ENSG00000154473	BUB3	BUB3L|hBUB3	budding uninhibited by benzimidazoles 3 homolog (yeast)	protein-coding
chr10	92658314	92658483	intron (NM_006413, intron 10 of 10)	L3|LINE|CR1	22634	NM_014391	27063	Hs.448589	NM_014391	ENSG00000148677	ANKRD1	ALRP|C-193|CARP|CVARP|MCARP|bA320F15.2	ankyrin repeat domain 1 (cardiac muscle)	protein-coding
chr10	30287207	30287376	Intergenic	(CA)n|Simple_repeat|Simple_repeat	61197	NM_020848	57608	Hs.533953	NM_020848	ENSG00000165757	KIAA1462	JCAD	KIAA1462	protein-coding
chr10	96989558	96989727	TTS (NM_207321)	TTS (NM_207321)	35685	NM_207321	142827	Hs.134229	NM_207321	ENSG00000173124	C10orf129	ACSM6|bA310E22.3	chromosome 10 open reading frame 129	protein-coding
chr10	132294652	132294821	Intergenic	Intergenic	360097	NM_001199868	10539	Hs.42644	NM_001199868	ENSG00000108010	GLRX3	GLRX4|GRX3|GRX4|PICOT|TXNL2|TXNL3	glutaredoxin 3	protein-coding
chr10	22518432	22518601	Intergenic	Intergenic	-19604	NM_001199938	340900	Hs.450519	NM_001199938		EBLN1	EBLN-1	endogenous Bornavirus-like nucleoprotein 1	protein-coding
chr10	132723158	132723327	Intergenic	(TG)n|Simple_repeat|Simple_repeat	37689	NR_036180	100422867		NR_036180		MIR378C	-	microRNA 378c	miscRNA
chr10	47058709	47058878	Intergenic	(CA)n|Simple_repeat|Simple_repeat	-24741	NM_005972	5540	Hs.524719	NM_005972	ENSG00000204174	PPYR1	NPY4-R|NPY4R|PP1|Y4	pancreatic polypeptide receptor 1	protein-coding
chr10	25832884	25833053	intron (NM_020752, intron 5 of 10)	intron (NM_020752, intron 5 of 10)	-367763	NR_027333	100128811	Hs.700407	NR_027333		GPR158-AS1	-	GPR158 antisense RNA 1	miscRNA
chr10	96989537	96989706	TTS (NM_207321)	TTS (NM_207321)	35664	NM_207321	142827	Hs.134229	NM_207321	ENSG00000173124	C10orf129	ACSM6|bA310E22.3	chromosome 10 open reading frame 129	protein-coding
chr10	124754870	124755039	intron (NM_022466, intron 4 of 4)	L2c|LINE|L2	13357	NM_022466	64376	Hs.501289	NM_022466	ENSG00000095574	IKZF5	PEGASUS|ZNFN1A5	IKAROS family zinc finger 5 (Pegasus)	protein-coding
chr10	127941841	127942010	intron (NM_021641, intron 3 of 18)	intron (NM_021641, intron 3 of 18)	135202	NM_003474	8038	Hs.594351	NM_003474	ENSG00000148848	ADAM12	MCMP|MCMPMltna|MLTN|MLTNA	ADAM metallopeptidase domain 12	protein-coding
chr10	47058631	47058800	Intergenic	(CA)n|Simple_repeat|Simple_repeat	-24819	NM_005972	5540	Hs.524719	NM_005972	ENSG00000204174	PPYR1	NPY4-R|NPY4R|PP1|Y4	pancreatic polypeptide receptor 1	protein-coding
chr10	44796649	44796818	Intergenic	Intergenic	8535	NM_001258000	100130539	Hs.694626	NM_001258000		LOC100130539	-	uncharacterized LOC100130539	protein-coding
chr10	101845406	101845575	Intergenic	Intergenic	-3848	NM_001308	1369	Hs.2246	NM_001308	ENSG00000120054	CPN1	CPN|SCPN	carboxypeptidase N, polypeptide 1	protein-coding
chr10	4705422	4705591	TTS (NR_015425)	TTS (NR_015425)	7158	NR_015425	338588	Hs.121365	NR_015425		LOC338588	-	uncharacterized LOC338588	miscRNA
chr10	47059086	47059255	Intergenic	Intergenic	-24364	NM_005972	5540	Hs.524719	NM_005972	ENSG00000204174	PPYR1	NPY4-R|NPY4R|PP1|Y4	pancreatic polypeptide receptor 1	protein-coding
chr10	424315	424484	intron (NM_014974, intron 17 of 36)	(CA)n|Simple_repeat|Simple_repeat	198465	NM_001202468	10771	Hs.740145	NM_001202464	ENSG00000015171	ZMYND11	BRAM1|BS69	zinc finger, MYND-type containing 11	protein-coding
chr10	42365076	42365245	Intergenic	(CATTC)n|Satellite|Satellite	498333	NR_024380	441666	Hs.255729	NR_024380		LOC441666	-	zinc finger protein 91 pseudogene	pseudo
chr10	38798203	38798372	Intergenic	(GAATG)n|Satellite|Satellite	81213	NR_024497	399744	Hs.497951	NM_001013665		LOC399744	-	uncharacterized LOC399744	miscRNA
chr10	52413925	52414094	Intergenic	LTR16A|LTR|ERVL	-30272	NM_147156	259230	Hs.654698	NM_147156	ENSG00000198964	SGMS1	MOB|MOB1|SMS1|TMEM23|hmob33	sphingomyelin synthase 1	protein-coding
chr10	99449476	99449645	Intergenic	Intergenic	-2545	NM_021732	60370	Hs.23918	NM_021732	ENSG00000119986	AVPI1	PP5395|RP11-548K23.7|VIP32|VIT32	arginine vasopressin-induced 1	protein-coding
chr10	98377595	98377764	intron (NM_152309, intron 12 of 16)	intron (NM_152309, intron 12 of 16)	-30870	NM_020123	56889	Hs.500674	NM_020123	ENSG00000077147	TM9SF3	EP70-P-iso|SMBP	transmembrane 9 superfamily member 3	protein-coding
chr10	52274925	52275094	intron (NM_147156, intron 3 of 10)	intron (NM_147156, intron 3 of 10)	108728	NM_147156	259230	Hs.654698	NM_147156	ENSG00000198964	SGMS1	MOB|MOB1|SMS1|TMEM23|hmob33	sphingomyelin synthase 1	protein-coding
chr10	4583563	4583732	Intergenic	MLT1H2|LTR|ERVL-MaLR	-114701	NR_015425	338588	Hs.121365	NR_015425		LOC338588	-	uncharacterized LOC338588	miscRNA
chr10	33423125	33423294	Intergenic	Intergenic	-175916	NM_002211	3688	Hs.643813	NM_002211	ENSG00000150093	ITGB1	CD29|FNRB|GPIIA|MDF2|MSK12|VLA-BETA|VLAB	integrin, beta 1 (fibronectin receptor, beta polypeptide, antigen CD29 includes MDF2, MSK12)	protein-coding
chr10	35013873	35014042	intron (NM_001184791, intron 1 of 20)	MIR|SINE|MIR	90296	NM_001184791	56288	Hs.131489	NM_001184785	ENSG00000148498	PARD3	ASIP|Baz|PAR3|PAR3alpha|PARD-3|PARD3A|SE2-5L16|SE2-5LT1|SE2-5T2	par-3 partitioning defective 3 homolog (C. elegans)	protein-coding
chr10	38785650	38785819	Intergenic	(GAATG)n|Satellite|Satellite	68660	NR_024497	399744	Hs.497951	NM_001013665		LOC399744	-	uncharacterized LOC399744	miscRNA
chr10	99310446	99310615	intron (NM_024954, intron 1 of 2)	(CA)n|Simple_repeat|Simple_repeat	-21726	NM_001129981	26287	Hs.73708	NM_001129981	ENSG00000165887	ANKRD2	ARPP	ankyrin repeat domain 2 (stretch responsive muscle)	protein-coding
chr10	128148787	128148956	intron (NM_001004298, intron 5 of 8)	L2c|LINE|L2	61139	NM_001004298	118611	Hs.587663	NM_001004298	ENSG00000154493	C10orf90	FATS|bA422P15.2	chromosome 10 open reading frame 90	protein-coding
chr10	132974617	132974786	intron (NM_174937, intron 4 of 11)	intron (NM_174937, intron 4 of 11)	135283	NM_174937	256536	Hs.126575	NM_174937	ENSG00000176769	TCERG1L	-	transcription elongation regulator 1-like	protein-coding
chr10	101548445	101548614	intron (NM_000392, intron 2 of 31)	intron (NM_000392, intron 2 of 31)	6066	NM_000392	1244	Hs.368243	NM_000392	ENSG00000023839	ABCC2	ABC30|CMOAT|DJS|MRP2|cMRP	ATP-binding cassette, sub-family C (CFTR/MRP), member 2	protein-coding
chr10	65467174	65467343	Intergenic	Intergenic	186135	NM_001001330	221035	Hs.499833	NM_001001330	ENSG00000165476	REEP3	C10orf74	receptor accessory protein 3	protein-coding
chr10	124485150	124485319	Intergenic	Intergenic	-25896	NM_001010912	399814	Hs.363649	NM_001010912	ENSG00000183559	C10orf120	bA318C4.1	chromosome 10 open reading frame 120	protein-coding
chr10	114505278	114505447	intron (NM_145206, intron 7 of 7)	Arthur1|DNA|hAT-Tip100	111433	NR_036177	100422909		NR_036177		MIR4295	-	microRNA 4295	miscRNA
chr10	99334728	99334897	intron (NM_001129981, intron 1 of 7)	MIRb|SINE|MIR	2556	NM_020349	26287	Hs.73708	NM_001129981	ENSG00000165887	ANKRD2	ARPP	ankyrin repeat domain 2 (stretch responsive muscle)	protein-coding
chr10	35549102	35549271	intron (NM_181698, intron 3 of 11)	intron (NM_181698, intron 3 of 11)	13233	NM_181698	219771	Hs.714184	NM_145012	ENSG00000108100	CCNY	C10orf9|CBCP1|CCNX|CFP1	cyclin Y	protein-coding
chr10	52638644	52638813	intron (NM_138932, intron 1 of 12)	intron (NM_138932, intron 1 of 12)	6707	NM_138932	29974	Hs.282795	NM_001198818	ENSG00000148584	A1CF	ACF|ACF64|ACF65|APOBEC1CF|ASP	APOBEC1 complementation factor	protein-coding
chr10	29429878	29430047	Intergenic	AluSz6|SINE|Alu	-148028	NM_032517	84569	Hs.558572	NM_032517	ENSG00000120563	LYZL1	KAAG648|LYC2|PRO1278|bA534G20.1	lysozyme-like 1	protein-coding
chr10	65467140	65467309	Intergenic	Intergenic	186101	NM_001001330	221035	Hs.499833	NM_001001330	ENSG00000165476	REEP3	C10orf74	receptor accessory protein 3	protein-coding
chr10	128072942	128073111	intron (NM_021641, intron 1 of 18)	HAL1|LINE|L1	4101	NM_003474	8038	Hs.594351	NM_003474	ENSG00000148848	ADAM12	MCMP|MCMPMltna|MLTN|MLTNA	ADAM metallopeptidase domain 12	protein-coding
chr10	99626409	99626578	3' UTR (NM_001010917, exon 5 of 5)	3' UTR (NM_001010917, exon 5 of 5)	16498	NM_001010917	401647	Hs.567524	NM_001010917	ENSG00000155265	GOLGA7B	C10orf132|C10orf133|bA451M19.3|bA459F3.4	golgin A7 family, member B	protein-coding
chr10	22518420	22518589	Intergenic	tRNA-Asn-AAC|tRNA|tRNA	-19592	NM_001199938	340900	Hs.450519	NM_001199938		EBLN1	EBLN-1	endogenous Bornavirus-like nucleoprotein 1	protein-coding
chr10	79110508	79110677	intron (NM_001014797, intron 2 of 28)	intron (NM_001014797, intron 2 of 28)	286985	NM_002247	3778	Hs.144795	NM_001014797	ENSG00000156113	KCNMA1	BKTM|KCa1.1|MaxiK|SAKCA|SLO|SLO-ALPHA|SLO1|bA205K10.1|mSLO1	potassium large conductance calcium-activated channel, subfamily M, alpha member 1	protein-coding
chr10	45202313	45202482	Intergenic	Intergenic	-204367	NM_001123376	643236	Hs.292788	NM_001123376	ENSG00000187783	TMEM72	C10orf127|KSP37|bA285G1.3	transmembrane protein 72	protein-coding
chr10	102487348	102487517	Intergenic	Intergenic	-18036	NM_003988	5076	Hs.155644	NM_000278	ENSG00000075891	PAX2	-	paired box 2	protein-coding
chr10	36783416	36783585	Intergenic	Intergenic	-631285	NM_052997	91074	Hs.373787	NM_052997	ENSG00000148513	ANKRD30A	NY-BR-1	ankyrin repeat domain 30A	protein-coding
chr10	81041579	81041748	intron (NM_020338, intron 8 of 24)	intron (NM_020338, intron 8 of 24)	-65557	NM_005729	10105	Hs.381072	NM_005729	ENSG00000108179	PPIF	CYP3|Cyp-D	peptidylprolyl isomerase F	protein-coding
chr10	3797259	3797428	Intergenic	Intergenic	30130	NM_001160125	1316	Hs.709396	NM_001160124	ENSG00000067082	KLF6	BCD1|CBA1|COPEB|CPBP|GBF|PAC1|ST12|ZF9	Kruppel-like factor 6	protein-coding
chr10	103602647	103602816	intron (NM_173191, intron 1 of 9)	intron (NM_173191, intron 1 of 9)	946	NM_014591	30819	Hs.97044	NM_014591	ENSG00000120049	KCNIP2	KCHIP2	Kv channel interacting protein 2	protein-coding
chr10	124614287	124614456	intron (NM_152644, intron 2 of 3)	intron (NM_152644, intron 2 of 3)	-8680	NM_022034	50624	Hs.647182	NM_022034	ENSG00000138161	CUZD1	ERG-1|UO-44	CUB and zona pellucida-like domains 1	protein-coding
chr10	47023244	47023413	Intergenic	(TG)n|Simple_repeat|Simple_repeat	29782	NM_014696	9721	Hs.523375	NM_014696		GPRIN2	GRIN2|KIAA0514	G protein regulated inducer of neurite outgrowth 2	protein-coding
chr10	103598584	103598753	intron (NM_173191, intron 1 of 9)	intron (NM_173191, intron 1 of 9)	943	NM_173194	30819	Hs.97044	NM_014591	ENSG00000120049	KCNIP2	KCHIP2	Kv channel interacting protein 2	protein-coding
chr10	102130919	102131088	Intergenic	Intergenic	-2330	NR_026762	90271	Hs.628088	NR_026762		LINC00263	C10orf75|NCRNA00263	long intergenic non-protein coding RNA 263	miscRNA
chr10	127940233	127940402	intron (NM_021641, intron 3 of 18)	(TGGA)n|Simple_repeat|Simple_repeat	136810	NM_003474	8038	Hs.594351	NM_003474	ENSG00000148848	ADAM12	MCMP|MCMPMltna|MLTN|MLTNA	ADAM metallopeptidase domain 12	protein-coding
chr10	121106677	121106846	intron (NM_005308, intron 2 of 15)	(TG)n|Simple_repeat|Simple_repeat	-30723	NR_039829	100616398		NR_039829		MIR4681	-	microRNA 4681	miscRNA
chr10	102832546	102832715	Intergenic	Intergenic	11631	NM_030929	81621	Hs.632079	NM_030929	ENSG00000107821	KAZALD1	BONO1|FKSG28|FKSG40|IGFBP-rP10	Kazal-type serine peptidase inhibitor domain 1	protein-coding
chr10	35283562	35283731	Intergenic	Intergenic	79612	NM_001198779	8453	Hs.82919	NM_001198777	ENSG00000108094	CUL2	-	cullin 2	protein-coding
chr10	24995448	24995617	intron (NM_020824, intron 2 of 25)	intron (NM_020824, intron 2 of 25)	17065	NM_020824	57584	Hs.524195	NM_020824	ENSG00000107863	ARHGAP21	ARHGAP10	Rho GTPase activating protein 21	protein-coding
chr10	33553334	33553503	intron (NR_045259, intron 2 of 15)	intron (NR_045259, intron 2 of 15)	70415	NM_001244972	8829	Hs.653996	NM_001024628	ENSG00000099250	NRP1	BDCA4|CD304|NP1|NRP|VEGF165R	neuropilin 1	protein-coding
chr10	130542394	130542563	Intergenic	Intergenic	-618010	NM_001145966	4288	Hs.689823	NM_001145966	ENSG00000148773	MKI67	KIA	antigen identified by monoclonal antibody Ki-67	protein-coding
chr10	72420622	72420791	Intergenic	Tigger7|DNA|TcMar-Tigger	-11853	NM_139155	140766	Hs.352156	NM_080722	ENSG00000138316	ADAMTS14	-	ADAM metallopeptidase with thrombospondin type 1 motif, 14	protein-coding
chr10	44675797	44675966	Intergenic	Intergenic	-112317	NM_001258000	100130539	Hs.694626	NM_001258000		LOC100130539	-	uncharacterized LOC100130539	protein-coding
chr10	127940209	127940378	intron (NM_021641, intron 3 of 18)	(TGGA)n|Simple_repeat|Simple_repeat	136834	NM_003474	8038	Hs.594351	NM_003474	ENSG00000148848	ADAM12	MCMP|MCMPMltna|MLTN|MLTNA	ADAM metallopeptidase domain 12	protein-coding
chr10	42661375	42661544	Intergenic	(GAATG)n|Satellite|Satellite	202034	NR_024380	441666	Hs.255729	NR_024380		LOC441666	-	zinc finger protein 91 pseudogene	pseudo
chr10	122196388	122196557	Intergenic	MLT1K|LTR|ERVL-MaLR	-19994	NM_001030059	196051	Hs.40479	NM_001030059	ENSG00000203805	PPAPDC1A	DPPL2|PPAPDC1	phosphatidic acid phosphatase type 2 domain containing 1A	protein-coding
chr10	42790787	42790956	Intergenic	(CATTA)n|Simple_repeat|Simple_repeat	72622	NR_024380	441666	Hs.255729	NR_024380		LOC441666	-	zinc finger protein 91 pseudogene	pseudo
chr10	127986536	127986705	intron (NM_021641, intron 2 of 18)	L1MEg|LINE|L1	90507	NM_003474	8038	Hs.594351	NM_003474	ENSG00000148848	ADAM12	MCMP|MCMPMltna|MLTN|MLTNA	ADAM metallopeptidase domain 12	protein-coding
chr10	30286867	30287036	Intergenic	(CA)n|Simple_repeat|Simple_repeat	61537	NM_020848	57608	Hs.533953	NM_020848	ENSG00000165757	KIAA1462	JCAD	KIAA1462	protein-coding
chr10	125649060	125649229	intron (NM_198148, intron 1 of 13)	intron (NM_198148, intron 1 of 13)	2356	NM_198148	119587	Hs.656887	NM_198148	ENSG00000121898	CPXM2	CPX2|UNQ676	carboxypeptidase X (M14 family), member 2	protein-coding
chr10	1541372	1541541	intron (NM_018702, intron 1 of 9)	(CTCA)n|Simple_repeat|Simple_repeat	-27369	NR_033387	642394	Hs.568831	NR_033387		ADARB2-AS1	C10orf109|NCRNA00168|bA466B20.1	ADARB2 antisense RNA 1	miscRNA
chr10	89870107	89870276	Intergenic	L2c|LINE|L2	246996	NM_000314	5728	Hs.500466	NM_000314	ENSG00000171862	PTEN	10q23del|BZS|DEC|GLM2|MHAM|MMAC1|PTEN1|TEP1	phosphatase and tensin homolog	protein-coding
chr10	98373491	98373660	intron (NM_152309, intron 13 of 16)	intron (NM_152309, intron 13 of 16)	-26766	NM_020123	56889	Hs.500674	NM_020123	ENSG00000077147	TM9SF3	EP70-P-iso|SMBP	transmembrane 9 superfamily member 3	protein-coding
chr10	120759207	120759376	Intergenic	ERVL-E-int|LTR|ERVL	-29937	NM_199461	340719	Hs.591918	NM_001009553	ENSG00000188613	NANOS1	NOS1	nanos homolog 1 (Drosophila)	protein-coding
chr10	133806613	133806782	Intergenic	L1ME1|LINE|L1	-11262	NM_004052	664	Hs.144873	NM_004052	ENSG00000176171	BNIP3	NIP3	BCL2/adenovirus E1B 19kDa interacting protein 3	protein-coding
chr10	29163628	29163797	Intergenic	Intergenic	-78733	NR_038375	100507605	Hs.119207	NR_038374		LOC100507605	-	uncharacterized LOC100507605	miscRNA
chr10	60616277	60616446	Intergenic	Intergenic	141586	NR_027508	728640	Hs.729209	NR_027508		FAM133CP	-	family with sequence similarity 133, member A pseudogene	pseudo
chr10	470825	470994	intron (NM_014974, intron 4 of 36)	intron (NM_014974, intron 4 of 36)	216809	NR_049884	100847086		NR_049884		MIR5699	-	microRNA 5699	miscRNA
chr10	114635385	114635554	Intergenic	L1MD3|LINE|L1	-74540	NM_001198528	6934	Hs.593995	NM_001146274	ENSG00000148737	TCF7L2	TCF-4|TCF4	transcription factor 7-like 2 (T-cell specific, HMG-box)	protein-coding
chr10	92079367	92079536	Intergenic	Intergenic	490201	NR_038382	643529	Hs.618956	NR_038382		LOC643529	-	hCG2024094	miscRNA
chr10	99599998	99600167	Intergenic	Intergenic	-9913	NM_001010917	401647	Hs.567524	NM_001010917	ENSG00000155265	GOLGA7B	C10orf132|C10orf133|bA451M19.3|bA459F3.4	golgin A7 family, member B	protein-coding
chr10	102458279	102458448	Intergenic	L1ME3|LINE|L1	-47105	NM_003988	5076	Hs.155644	NM_000278	ENSG00000075891	PAX2	-	paired box 2	protein-coding
chr10	35549056	35549225	intron (NM_181698, intron 3 of 11)	intron (NM_181698, intron 3 of 11)	13187	NM_181698	219771	Hs.714184	NM_145012	ENSG00000108100	CCNY	C10orf9|CBCP1|CCNX|CFP1	cyclin Y	protein-coding
chr10	99468200	99468369	Intergenic	LTR40c|LTR|ERVL	-5181	NM_031484	83742	Hs.209614	NM_031484	ENSG00000155254	MARVELD1	GB14|MARVD1|MRVLDC1|RP11-548K23.8|bA548K23.8	MARVEL domain containing 1	protein-coding
chr10	95833350	95833519	intron (NM_016341, intron 2 of 32)	MER117|DNA|hAT-Charlie	-15396	NM_001165979	51196	Hs.655033	NM_001165979	ENSG00000138193	PLCE1	NPHS3|PLCE|PPLC	phospholipase C, epsilon 1	protein-coding
chr10	69895981	69896150	intron (NM_001256268, intron 5 of 23)	intron (NM_001256268, intron 5 of 23)	26875	NM_001256268	84665	Hs.55205	NM_001256267	ENSG00000138347	MYPN	MYOP	myopalladin	protein-coding
chr10	133994370	133994539	intron (NM_001105521, intron 23 of 23)	(TG)n|Simple_repeat|Simple_repeat	-5960	NM_006426	10570	Hs.100058	NM_006426	ENSG00000151640	DPYSL4	CRMP3|DRP-4|ULIP4	dihydropyrimidinase-like 4	protein-coding
chr10	99772817	99772986	intron (NM_001206528, intron 1 of 14)	intron (NM_001206528, intron 1 of 14)	17684	NM_001206528	55118	Hs.500736	NM_001206528	ENSG00000095713	CRTAC1	ASPIC|ASPIC1|CEP-68	cartilage acidic protein 1	protein-coding
chr10	1541383	1541552	intron (NM_018702, intron 1 of 9)	(CTCA)n|Simple_repeat|Simple_repeat	-27358	NR_033387	642394	Hs.568831	NR_033387		ADARB2-AS1	C10orf109|NCRNA00168|bA466B20.1	ADARB2 antisense RNA 1	miscRNA
chr10	38797175	38797344	Intergenic	(GAATG)n|Satellite|Satellite	80185	NR_024497	399744	Hs.497951	NM_001013665		LOC399744	-	uncharacterized LOC399744	miscRNA
chr10	79110487	79110656	intron (NM_001014797, intron 2 of 28)	intron (NM_001014797, intron 2 of 28)	287006	NM_002247	3778	Hs.144795	NM_001014797	ENSG00000156113	KCNMA1	BKTM|KCa1.1|MaxiK|SAKCA|SLO|SLO-ALPHA|SLO1|bA205K10.1|mSLO1	potassium large conductance calcium-activated channel, subfamily M, alpha member 1	protein-coding
chr10	125532038	125532207	intron (NM_198148, intron 7 of 13)	intron (NM_198148, intron 7 of 13)	106251	NM_153442	2849	Hs.12751	NM_153442	ENSG00000154478	GPR26	-	G protein-coupled receptor 26	protein-coding
chr10	114592854	114593023	Intergenic	MER117|DNA|hAT-Charlie	-117071	NM_001198528	6934	Hs.593995	NM_001146274	ENSG00000148737	TCF7L2	TCF-4|TCF4	transcription factor 7-like 2 (T-cell specific, HMG-box)	protein-coding
chr10	47138071	47138240	intron (NR_033957, intron 1 of 3)	intron (NR_033957, intron 1 of 3)	-4319	NR_003277	728643	Hs.711067	NR_003277		LOC728643	-	heterogeneous nuclear ribonucleoprotein A1 pseudogene	pseudo
chr10	102727647	102727816	Intergenic	Intergenic	-4555	NM_017893	57715	Hs.735152	NM_017893	ENSG00000095539	SEMA4G	-	sema domain, immunoglobulin domain (Ig), transmembrane domain (TM) and short cytoplasmic domain, (semaphorin) 4G	protein-coding
chr10	95650826	95650995	Intergenic	Intergenic	-2820	NM_153226	159371	Hs.733450	NM_001134658	ENSG00000176273	SLC35G1	C10orf60|TMEM20	solute carrier family 35, member G1	protein-coding
chr10	106349678	106349847	Intergenic	Intergenic	-51097	NM_014978	22986	Hs.671950	NM_014978	ENSG00000156395	SORCS3	SORCS	sortilin-related VPS10 domain containing receptor 3	protein-coding
chr10	35047384	35047553	intron (NM_001184791, intron 1 of 20)	intron (NM_001184791, intron 1 of 20)	56785	NM_001184791	56288	Hs.131489	NM_001184785	ENSG00000148498	PARD3	ASIP|Baz|PAR3|PAR3alpha|PARD-3|PARD3A|SE2-5L16|SE2-5LT1|SE2-5T2	par-3 partitioning defective 3 homolog (C. elegans)	protein-coding
chr10	92133666	92133835	Intergenic	Intergenic	483921	NM_019860	3363	Hs.73739	NM_000872	ENSG00000148680	HTR7	5-HT7	5-hydroxytryptamine (serotonin) receptor 7, adenylate cyclase-coupled	protein-coding
chr10	33654919	33655088	Intergenic	LTR26|LTR|ERV1	-31170	NM_001024629	8829	Hs.653996	NM_001024628	ENSG00000099250	NRP1	BDCA4|CD304|NP1|NRP|VEGF165R	neuropilin 1	protein-coding
chr10	95228360	95228529	intron (NM_133337, intron 1 of 52)	intron (NM_133337, intron 1 of 52)	13630	NM_013451	26509	Hs.602086	NM_013451	ENSG00000138119	MYOF	FER1L3	myoferlin	protein-coding
chr10	33514411	33514580	intron (NM_001244972, intron 7 of 16)	intron (NM_001244972, intron 7 of 16)	109338	NM_001244972	8829	Hs.653996	NM_001024628	ENSG00000099250	NRP1	BDCA4|CD304|NP1|NRP|VEGF165R	neuropilin 1	protein-coding
chr10	35740155	35740324	intron (NM_145012, intron 1 of 9)	intron (NM_145012, intron 1 of 9)	114437	NM_145012	219771	Hs.714184	NM_145012	ENSG00000108100	CCNY	C10orf9|CBCP1|CCNX|CFP1	cyclin Y	protein-coding
chr10	50518607	50518776	intron (NM_001135196, intron 1 of 2)	MIRc|SINE|MIR	11504	NM_001135196	118461	Hs.585480	NM_001135196	ENSG00000177354	C10orf71	-	chromosome 10 open reading frame 71	protein-coding
chr10	132572471	132572640	Intergenic	Intergenic	188376	NR_036180	100422867		NR_036180		MIR378C	-	microRNA 378c	miscRNA
chr10	122734551	122734720	intron (NR_049879, intron 4 of 4)	L1M4|LINE|L1	-123944	NR_033850	283089	Hs.568750	NR_033850		WDR11-AS1	-	WDR11 antisense RNA 1	miscRNA
chr10	4791497	4791666	Intergenic	Intergenic	-71319	NR_024475	100216001	Hs.634869	NR_024475		LOC100216001	-	uncharacterized LOC100216001	miscRNA
chr10	78166311	78166480	intron (NM_032024, intron 5 of 5)	7SK|RNA|RNA	623876	NM_032024	83938	Hs.118161	NM_032024	ENSG00000148655	C10orf11	-	chromosome 10 open reading frame 11	protein-coding
chr10	47107717	47107886	intron (NR_033957, intron 1 of 3)	intron (NR_033957, intron 1 of 3)	24267	NM_005972	5540	Hs.524719	NM_005972	ENSG00000204174	PPYR1	NPY4-R|NPY4R|PP1|Y4	pancreatic polypeptide receptor 1	protein-coding
chr10	29583267	29583436	intron (NM_032517, intron 3 of 4)	intron (NM_032517, intron 3 of 4)	5361	NM_032517	84569	Hs.558572	NM_032517	ENSG00000120563	LYZL1	KAAG648|LYC2|PRO1278|bA534G20.1	lysozyme-like 1	protein-coding
chr10	85629769	85629938	Intergenic	Intergenic	-269332	NM_014394	27069	Hs.352656	NM_014394	ENSG00000165678	GHITM	DERP2|HSPC282|MICS1|PTD010|TMBIM5	growth hormone inducible transmembrane protein	protein-coding
chr10	92720348	92720517	Intergenic	ERVL-B4-int|LTR|ERVL	-39400	NM_014391	27063	Hs.448589	NM_014391	ENSG00000148677	ANKRD1	ALRP|C-193|CARP|CVARP|MCARP|bA320F15.2	ankyrin repeat domain 1 (cardiac muscle)	protein-coding
chr10	24868956	24869125	Intergenic	Intergenic	143557	NM_020824	57584	Hs.524195	NM_020824	ENSG00000107863	ARHGAP21	ARHGAP10	Rho GTPase activating protein 21	protein-coding
chr10	103326866	103327035	Intergenic	Intergenic	21077	NM_001174085	27343	Hs.523230	NM_001174084	ENSG00000166169	POLL	BETAN|POLKAPPA	polymerase (DNA directed), lambda	protein-coding
chr10	113669427	113669596	Intergenic	MLT1J2|LTR|ERVL-MaLR	274026	NM_001244949	57678	Hs.42586	NM_001244949	ENSG00000119927	GPAM	GPAT|GPAT1	glycerol-3-phosphate acyltransferase, mitochondrial	protein-coding
chr10	89758019	89758188	Intergenic	MSTA|LTR|ERVL-MaLR	134908	NM_000314	5728	Hs.500466	NM_000314	ENSG00000171862	PTEN	10q23del|BZS|DEC|GLM2|MHAM|MMAC1|PTEN1|TEP1	phosphatase and tensin homolog	protein-coding
chr10	33445199	33445368	Intergenic	Intergenic	178550	NM_001244972	8829	Hs.653996	NM_001024628	ENSG00000099250	NRP1	BDCA4|CD304|NP1|NRP|VEGF165R	neuropilin 1	protein-coding
chr10	35359448	35359617	intron (NM_001198778, intron 2 of 20)	Charlie8|DNA|hAT-Charlie	3726	NM_001198779	8453	Hs.82919	NM_001198777	ENSG00000108094	CUL2	-	cullin 2	protein-coding
chr10	29821180	29821349	intron (NM_021738, intron 8 of 37)	intron (NM_021738, intron 8 of 37)	12762	NR_030335	693189		NR_030335		MIR604	MIRN604|hsa-mir-604	microRNA 604	miscRNA
chr10	120282391	120282560	Intergenic	MER58A|DNA|hAT-Charlie	72685	NM_004248	2834	Hs.248119	NM_004248	ENSG00000119973	PRLHR	GPR10|GR3|PrRPR	prolactin releasing hormone receptor	protein-coding
chr10	34020382	34020551	Intergenic	Intergenic	41142	NR_038932	100505583	Hs.568804	NR_038932		LOC100505583	-	uncharacterized LOC100505583	miscRNA
chr10	52156970	52157139	intron (NM_147156, intron 6 of 10)	intron (NM_147156, intron 6 of 10)	-148684	NM_019893	56624	Hs.512645	NM_001143974	ENSG00000188611	ASAH2	BCDase|HNAC1|LCDase|N-CDase|NCDase	N-acylsphingosine amidohydrolase (non-lysosomal ceramidase) 2	protein-coding
chr10	470803	470972	intron (NM_014974, intron 4 of 36)	intron (NM_014974, intron 4 of 36)	216831	NR_049884	100847086		NR_049884		MIR5699	-	microRNA 5699	miscRNA
chr10	134479601	134479770	intron (NM_005539, intron 4 of 15)	intron (NM_005539, intron 4 of 15)	119852	NM_177400	84504	Hs.134013	NM_177400	ENSG00000148826	NKX6-2	GTX|NKX6.2|NKX6B	NK6 homeobox 2	protein-coding
chr10	69853807	69853976	Intergenic	MER41B|LTR|ERV1	-11983	NM_001256267	84665	Hs.55205	NM_001256267	ENSG00000138347	MYPN	MYOP	myopalladin	protein-coding
chr10	106697451	106697620	intron (NM_014978, intron 3 of 26)	intron (NM_014978, intron 3 of 26)	296676	NM_014978	22986	Hs.671950	NM_014978	ENSG00000156395	SORCS3	SORCS	sortilin-related VPS10 domain containing receptor 3	protein-coding
chr10	2963753	2963922	Intergenic	Intergenic	-145875	NM_002627	5214	Hs.26010	NM_001242339	ENSG00000067057	PFKP	PFK-C|PFKF	phosphofructokinase, platelet	protein-coding
chr10	105319647	105319816	intron (NM_004210, intron 1 of 5)	(CA)n|Simple_repeat|Simple_repeat	65996	NM_004210	9148	Hs.741164	NM_004210	ENSG00000107954	NEURL	NEURL1|RNF67|bA416N2.1|neu|neu-1	neuralized homolog (Drosophila)	protein-coding
chr10	52360683	52360852	intron (NM_147156, intron 1 of 10)	intron (NM_147156, intron 1 of 10)	22970	NM_147156	259230	Hs.654698	NM_147156	ENSG00000198964	SGMS1	MOB|MOB1|SMS1|TMEM23|hmob33	sphingomyelin synthase 1	protein-coding
chr10	105610197	105610366	intron (NM_014631, intron 1 of 13)	intron (NM_014631, intron 1 of 13)	4883	NM_014631	9644	Hs.594708	NM_014631	ENSG00000107957	SH3PXD2A	FISH|SH3MD1|TKS5	SH3 and PX domains 2A	protein-coding
chr10	95706926	95707095	Intergenic	Intergenic	14662	NR_002319	266971	Hs.149255	NR_002319		PIPSL	PIP5K1L1|PIP5K1P3|PSMD4P2|bA429H9.1	PIP5K1A and PSMD4-like, pseudogene	pseudo
chr10	33355551	33355720	Intergenic	MLT1J|LTR|ERVL-MaLR	-108342	NM_002211	3688	Hs.643813	NM_002211	ENSG00000150093	ITGB1	CD29|FNRB|GPIIA|MDF2|MSK12|VLA-BETA|VLAB	integrin, beta 1 (fibronectin receptor, beta polypeptide, antigen CD29 includes MDF2, MSK12)	protein-coding
chr10	32434866	32435035	Intergenic	Intergenic	-89579	NM_004521	3799	Hs.327736	NM_004521	ENSG00000170759	KIF5B	KINH|KNS|KNS1|UKHC	kinesin family member 5B	protein-coding
chr10	129746614	129746783	intron (NM_006504, intron 1 of 20)	L1MC1|LINE|L1	41373	NM_006504	5791	Hs.127022	NM_006504	ENSG00000132334	PTPRE	HPTPE|PTPE|R-PTP-EPSILON	protein tyrosine phosphatase, receptor type, E	protein-coding
chr10	31933669	31933838	Intergenic	Intergenic	264101	NM_001270699	94134	Hs.741991	NM_001270695	ENSG00000165322	ARHGAP12	-	Rho GTPase activating protein 12	protein-coding
chr10	92900719	92900888	Intergenic	MER21B|LTR|ERVL	12034	NR_002779	119369	Hs.441287	NR_002779		NUDT9P1	C10orf98|bA56M3.1	nudix (nucleoside diphosphate linked moiety X)-type motif 9 pseudogene 1	pseudo
chr10	52047776	52047945	Intergenic	Intergenic	-39490	NM_019893	56624	Hs.512645	NM_001143974	ENSG00000188611	ASAH2	BCDase|HNAC1|LCDase|N-CDase|NCDase	N-acylsphingosine amidohydrolase (non-lysosomal ceramidase) 2	protein-coding
chr10	35294873	35295042	Intergenic	L2b|LINE|L2	68301	NM_001198779	8453	Hs.82919	NM_001198777	ENSG00000108094	CUL2	-	cullin 2	protein-coding
chr10	114579909	114580078	Intergenic	Intergenic	-130016	NM_001198528	6934	Hs.593995	NM_001146274	ENSG00000148737	TCF7L2	TCF-4|TCF4	transcription factor 7-like 2 (T-cell specific, HMG-box)	protein-coding
chr10	115707965	115708134	Intergenic	MER33|DNA|hAT-Charlie	93658	NM_198514	374354	Hs.594372	NM_198514	ENSG00000196865	NHLRC2	-	NHL repeat containing 2	protein-coding
chr10	30073427	30073596	Intergenic	Intergenic	-48781	NM_003174	6840	Hs.499209	NM_003174	ENSG00000197321	SVIL	-	supervillin	protein-coding
chr10	99360992	99361161	intron (NM_138413, intron 5 of 6)	intron (NM_138413, intron 5 of 6)	6101	NR_049868	100847017		NR_049868		MIR5692C2	-	microRNA 5692c-2	miscRNA
chr10	124128822	124128991	Intergenic	Intergenic	-5188	NM_001001974	59338	Hs.738826	NM_001001974	ENSG00000107679	PLEKHA1	TAPP1	pleckstrin homology domain containing, family A (phosphoinositide binding specific) member 1	protein-coding
chr10	101526177	101526346	Intergenic	Intergenic	-16202	NM_000392	1244	Hs.368243	NM_000392	ENSG00000023839	ABCC2	ABC30|CMOAT|DJS|MRP2|cMRP	ATP-binding cassette, sub-family C (CFTR/MRP), member 2	protein-coding
chr10	77738136	77738305	intron (NM_032024, intron 1 of 5)	MLT1J|LTR|ERVL-MaLR	195701	NM_032024	83938	Hs.118161	NM_032024	ENSG00000148655	C10orf11	-	chromosome 10 open reading frame 11	protein-coding
chr10	99051828	99051997	intron (NR_037909, intron 1 of 14)	MIRb|SINE|MIR	518	NM_032900	84986	Hs.80305	NM_001204300	ENSG00000213390	ARHGAP19	-	Rho GTPase activating protein 19	protein-coding
chr10	97894949	97895118	intron (NM_014803, intron 3 of 5)	intron (NM_014803, intron 3 of 5)	5561	NM_014803	9849	Hs.600823	NM_014803		ZNF518A	ZNF518	zinc finger protein 518A	protein-coding
chr10	3498358	3498527	Intergenic	Intergenic	-283409	NM_001242309	10531	Hs.528300	NM_014968	ENSG00000107959	PITRM1	MP1|PreP	pitrilysin metallopeptidase 1	protein-coding
chr10	115911335	115911504	intron (NM_018017, intron 3 of 15)	MER44C|DNA|TcMar-Tigger	22519	NR_031747	100302224		NR_031747		MIR2110	hsa-mir-2110	microRNA 2110	miscRNA
chr10	124230929	124231098	intron (NM_002775, intron 1 of 8)	intron (NM_002775, intron 1 of 8)	9972	NM_002775	5654	Hs.501280	NM_002775	ENSG00000166033	HTRA1	ARMD7|CARASIL|HtrA|L56|ORF480|PRSS11	HtrA serine peptidase 1	protein-coding
chr10	100246325	100246494	intron (NM_001166244, intron 9 of 10)	intron (NM_001166244, intron 9 of 10)	-39705	NM_000195	3257	Hs.404568	NM_000195	ENSG00000107521	HPS1	HPS	Hermansky-Pudlak syndrome 1	protein-coding
chr10	30037780	30037949	Intergenic	LTR40a|LTR|ERVL	-13134	NM_003174	6840	Hs.499209	NM_003174	ENSG00000197321	SVIL	-	supervillin	protein-coding
chr10	18279431	18279600	intron (NM_152725, intron 7 of 11)	intron (NM_152725, intron 7 of 11)	19976	NR_038419	100129213	Hs.568816	NR_038419		LOC100129213	-	uncharacterized LOC100129213	miscRNA
chr10	81080799	81080968	Intergenic	ERV3-16A3_I-int|LTR|ERVL	-26337	NM_005729	10105	Hs.381072	NM_005729	ENSG00000108179	PPIF	CYP3|Cyp-D	peptidylprolyl isomerase F	protein-coding
chr10	25198055	25198224	intron (NM_020200, intron 3 of 8)	AluJo|SINE|Alu	43394	NM_020200	56952	Hs.405619	NM_020200	ENSG00000099256	PRTFDC1	HHGP	phosphoribosyl transferase domain containing 1	protein-coding
chr10	99642271	99642440	intron (NM_001206528, intron 13 of 14)	intron (NM_001206528, intron 13 of 14)	32360	NM_001010917	401647	Hs.567524	NM_001010917	ENSG00000155265	GOLGA7B	C10orf132|C10orf133|bA451M19.3|bA459F3.4	golgin A7 family, member B	protein-coding
chr10	29885589	29885758	intron (NM_003174, intron 3 of 35)	intron (NM_003174, intron 3 of 35)	5602	NR_030634	100126327		NR_030634		MIR938	MIRN938|hsa-mir-938	microRNA 938	miscRNA
chr10	101665170	101665339	intron (NM_015221, intron 6 of 16)	AluJo|SINE|Alu	-21712	NR_024130	100188954	Hs.656104	NR_024130		DNMBP-AS1	NCRNA00093|bA287G8.2	DNMBP antisense RNA 1	miscRNA
chr10	47148402	47148571	intron (NR_033957, intron 1 of 3)	L1M4|LINE|L1	2914	NR_033957	643650	Hs.716692	NR_033957		LOC643650	-	uncharacterized LOC643650	miscRNA
chr10	98967742	98967911	intron (NR_037909, intron 11 of 14)	L2c|LINE|L2	-22143	NM_003061	6585	Hs.632082	NM_003061	ENSG00000187122	SLIT1	MEGF4|SLIL1|SLIT-1|SLIT3	slit homolog 1 (Drosophila)	protein-coding
chr10	97622035	97622204	intron (NM_001776, intron 8 of 9)	intron (NM_001776, intron 8 of 9)	-45603	NM_001130446	100127889	Hs.719076	NM_001130446	ENSG00000173088	C10orf131	bA690P14.3	chromosome 10 open reading frame 131	protein-coding
chr10	81198773	81198942	intron (NM_153367, intron 1 of 3)	Charlie4z|DNA|hAT-Charlie	6526	NM_153367	219654	Hs.523080	NM_153367	ENSG00000165424	ZCCHC24	C10orf56	zinc finger, CCHC domain containing 24	protein-coding
chr10	101571145	101571314	intron (NM_000392, intron 14 of 31)	intron (NM_000392, intron 14 of 31)	28766	NM_000392	1244	Hs.368243	NM_000392	ENSG00000023839	ABCC2	ABC30|CMOAT|DJS|MRP2|cMRP	ATP-binding cassette, sub-family C (CFTR/MRP), member 2	protein-coding
chr10	98610627	98610796	intron (NM_032440, intron 2 of 7)	Tigger4|DNA|TcMar-Tigger	17999	NM_032440	84458	Hs.741462	NM_001170765	ENSG00000196233	LCOR	MLR2	ligand dependent nuclear receptor corepressor	protein-coding
chr10	113806395	113806564	Intergenic	Intergenic	137058	NM_001244949	57678	Hs.42586	NM_001244949	ENSG00000119927	GPAM	GPAT|GPAT1	glycerol-3-phosphate acyltransferase, mitochondrial	protein-coding
chr10	104990242	104990411	Intergenic	MIRc|SINE|MIR	-15318	NM_001143909	729020	Hs.458437	NM_001143909		LOC729020	-	rcRPE	protein-coding
chr10	126778375	126778544	intron (NM_001083914, intron 2 of 10)	intron (NM_001083914, intron 2 of 10)	-57020	NR_036178	100423041		NR_036178		MIR4296	-	microRNA 4296	miscRNA
chr10	30781198	30781367	Intergenic	Intergenic	58332	NM_005204	1326	Hs.731448	NM_001244134	ENSG00000107968	MAP3K8	COT|EST|ESTF|MEKK8|TPL2|Tpl-2|c-COT	mitogen-activated protein kinase kinase kinase 8	protein-coding
chr10	121186398	121186567	intron (NM_005308, intron 6 of 15)	intron (NM_005308, intron 6 of 15)	48998	NR_039829	100616398		NR_039829		MIR4681	-	microRNA 4681	miscRNA
chr10	134991150	134991319	intron (NM_152643, intron 3 of 29)	(TG)n|Simple_repeat|Simple_repeat	17263	NM_152643	85442	Hs.530685	NM_152643	ENSG00000171798	KNDC1	C10orf23|RASGEF2|bB439H18.3	kinase non-catalytic C-lobe domain (KIND) containing 1	protein-coding
chr10	103124585	103124754	intron (NM_003939, intron 1 of 13)	U2|snRNA|snRNA	10879	NM_001256856	8945	Hs.713753	NM_001256856	ENSG00000166167	BTRC	BETA-TRCP|FBW1A|FBXW1|FBXW1A|FWD1|bTrCP|bTrCP1|betaTrCP	beta-transducin repeat containing E3 ubiquitin protein ligase	protein-coding
chr11	63229048	63229217	3' UTR (NM_001146729, exon 6 of 6)	3' UTR (NM_001146729, exon 6 of 6)	29548	NM_054108	117245	Hs.410316	NM_001146728	ENSG00000168004	HRASLS5	HRLP5|RLP1|iNAT	HRAS-like suppressor family, member 5	protein-coding
chr11	57480425	57480594	promoter-TSS (NM_153450)	promoter-TSS (NM_153450)	514	NR_037646	100528016	Hs.166011	NR_037646	ENSG00000254462	TMX2-CTNND1	-	TMX2-CTNND1 readthrough (non-protein coding)	miscRNA
chr11	65220408	65220577	Intergenic	Intergenic	8563	NR_030343	693197		NR_030343		MIR612	MIRN612|hsa-mir-612	microRNA 612	miscRNA
chr11	65222780	65222949	Intergenic	Intergenic	10935	NR_030343	693197		NR_030343		MIR612	MIRN612|hsa-mir-612	microRNA 612	miscRNA
chr11	119344725	119344894	intron (NR_034160, intron 3 of 3)	Tigger3a|DNA|TcMar-Tigger	-50563	NM_006288	7070	Hs.644697	NM_006288	ENSG00000154096	THY1	CD90	Thy-1 cell surface antigen	protein-coding
chr11	65371212	65371381	intron (NM_002419, intron 8 of 9)	intron (NM_002419, intron 8 of 9)	-7829	NM_033347	10089	Hs.175218	NM_005714	ENSG00000173338	KCNK7	K2p7.1|TWIK3	potassium channel, subfamily K, member 7	protein-coding
chr11	43852616	43852785	intron (NM_016142, intron 7 of 10)	intron (NM_016142, intron 7 of 10)	-49657	NM_139178	221120	Hs.720708	NM_139178	ENSG00000166199	ALKBH3	ABH3|DEPC-1|DEPC1|PCA1	alkB, alkylation repair homolog 3 (E. coli)	protein-coding
chr11	61265040	61265209	Intergenic	(TG)n|Simple_repeat|Simple_repeat	-10944	NR_039708	100616470		NR_039708		MIR4488	-	microRNA 4488	miscRNA
chr11	63914317	63914486	intron (NM_014067, intron 3 of 10)	(CA)n|Simple_repeat|Simple_repeat	19184	NM_014067	28992	Hs.602898	NM_014067	ENSG00000133315	MACROD1	LRP16	MACRO domain containing 1	protein-coding
chr11	102867051	102867220	Intergenic	Intergenic	-40672	NM_002427	4322	Hs.2936	NM_002427	ENSG00000137745	MMP13	CLG3|MANDP1	matrix metallopeptidase 13 (collagenase 3)	protein-coding
chr11	6629768	6629937	intron (NM_004517, intron 4 of 12)	intron (NM_004517, intron 4 of 12)	3623	NM_006284	6881	Hs.5158	NM_006284	ENSG00000166337	TAF10	TAF2A|TAF2H|TAFII30	TAF10 RNA polymerase II, TATA box binding protein (TBP)-associated factor, 30kDa	protein-coding
chr11	36615859	36616028	promoter-TSS (NM_138787)	promoter-TSS (NM_138787)	-150	NM_138787	119710	Hs.159376	NM_138787	ENSG00000166352	C11orf74	-	chromosome 11 open reading frame 74	protein-coding
chr11	35236348	35236517	exon (NM_000610, exon 15 of 18)	exon (NM_000610, exon 15 of 18)	76015	NM_001202556	960	Hs.502328	NM_000610	ENSG00000026508	CD44	CDW44|CSPG8|ECMR-III|HCELL|HUTCH-I|IN|LHR|MC56|MDU2|MDU3|MIC4|Pgp1	CD44 molecule (Indian blood group)	protein-coding
chr11	29415142	29415311	Intergenic	Intergenic	623351	NM_002233	3739	Hs.592002	NM_002233	ENSG00000182255	KCNA4	HBK4|HK1|HPCN2|HUKII|KCNA4L|KCNA8|KV1.4|PCN2	potassium voltage-gated channel, shaker-related subfamily, member 4	protein-coding
chr11	62038790	62038959	intron (NM_002411, intron 2 of 2)	(CA)n|Simple_repeat|Simple_repeat	1244	NM_002411	4250	Hs.46452	NM_002411	ENSG00000110484	SCGB2A2	MGB1|UGB2	secretoglobin, family 2A, member 2	protein-coding
chr11	66115488	66115657	promoter-TSS (NM_006876)	promoter-TSS (NM_006876)	-411	NM_006876	11041	Hs.8526	NM_006876	ENSG00000174684	B3GNT1	B3GN-T1|B3GNT6|BETA3GNTI|iGAT|iGNT	UDP-GlcNAc:betaGal beta-1,3-N-acetylglucosaminyltransferase 1	protein-coding
chr11	10522017	10522186	intron (NM_001025389, intron 11 of 14)	intron (NM_001025389, intron 11 of 14)	7772	NR_039705	100616263		NR_039705		MIR4485	-	microRNA 4485	miscRNA
chr11	62659781	62659950	Intergenic	Intergenic	10694	NR_037193	6520	Hs.502769	NM_001012662	ENSG00000168003	SLC3A2	4F2|4F2HC|4T2HC|CD98|CD98HC|MDU1|NACAE	solute carrier family 3 (activators of dibasic and neutral amino acid transport), member 2	protein-coding
chr11	62194440	62194609	Intergenic	Intergenic	8017	NM_003357	7356	Hs.523732	NM_003357	ENSG00000149021	SCGB1A1	CC10|CC16|CCPBP|CCSP|UGB|UP-1|UP1	secretoglobin, family 1A, member 1 (uteroglobin)	protein-coding
chr11	61530774	61530943	intron (NM_013279, intron 1 of 25)	intron (NM_013279, intron 1 of 25)	-5722	NR_026882	26070	Hs.564254	NR_026882		DKFZP434K028	-	uncharacterized LOC26070	miscRNA
chr11	62474618	62474787	promoter-TSS (NM_012202)	promoter-TSS (NM_012202)	-364	NM_012202	2785	Hs.740581	NM_012202	ENSG00000162188	GNG3	-	guanine nucleotide binding protein (G protein), gamma 3	protein-coding
chr11	66724285	66724454	intron (NM_001040716, intron 1 of 22)	L2b|LINE|L2	1478	NM_001040716	5091	Hs.89890	NM_000920	ENSG00000173599	PC	PCB	pyruvate carboxylase	protein-coding
chr11	65194514	65194683	TTS (NR_028272)	TTS (NR_028272)	4329	NR_028272	283131	Hs.523789	NR_002802		NEAT1	LINC00084|NCRNA00084|TncRNA	nuclear paraspeckle assembly transcript 1 (non-protein coding)	miscRNA
chr11	46313921	46314090	intron (NM_052854, intron 1 of 11)	L2b|LINE|L2	14777	NM_052854	90993	Hs.405961	NM_052854	ENSG00000157613	CREB3L1	OASIS	cAMP responsive element binding protein 3-like 1	protein-coding
chr11	61261011	61261180	Intergenic	Intergenic	12510	NM_001170753	220004	Hs.729003	NM_001170753	ENSG00000162148	PPP1R32	C11orf66|IIIG9	protein phosphatase 1, regulatory subunit 32	protein-coding
chr11	2958862	2959031	Intergenic	L1MB3|LINE|L1	-8296	NM_003311	7262	Hs.154036	NM_003311	ENSG00000181649	PHLDA2	BRW1C|BWR1C|HLDA2|IPL|TSSC3	pleckstrin homology-like domain, family A, member 2	protein-coding
chr11	41870061	41870230	Intergenic	MER49|LTR|ERV1	-388959	NM_020929	57689	Hs.741547	NM_001258419	ENSG00000148948	LRRC4C	NGL-1|NGL1	leucine rich repeat containing 4C	protein-coding
chr11	33262938	33263107	Intergenic	L1MC3|LINE|L1	-16146	NM_001048200	10114	Hs.201918	NM_001048200	ENSG00000110422	HIPK3	DYRK6|FIST3|PKY|YAK1	homeodomain interacting protein kinase 3	protein-coding
chr11	11444637	11444806	intron (NM_198516, intron 3 of 10)	(CATG)n|Simple_repeat|Simple_repeat	-69817	NM_001256686	283106	Hs.741126	NR_002207		CSNK2A1P	-	casein kinase 2, alpha 1 polypeptide pseudogene	protein-coding
chr11	1752716	1752885	TTS (NM_001170820)	TTS (NM_001170820)	19024	NM_001170820	402778	Hs.121575	NM_001170820	ENSG00000244242	IFITM10	DSPA3	interferon induced transmembrane protein 10	protein-coding
chr11	104643750	104643919	Intergenic	Intergenic	125563	NR_034070	100506742	Hs.476989	NM_001191016	ENSG00000204403	CASP12	CASP-12|CASP12P1	caspase 12 (gene/pseudogene)	protein-coding
chr11	66477300	66477469	intron (NM_006946, intron 9 of 36)	intron (NM_006946, intron 9 of 36)	11486	NM_006946	6712	Hs.26915	NM_006946	ENSG00000173898	SPTBN2	GTRAP41|SCA5	spectrin, beta, non-erythrocytic 2	protein-coding
chr11	62622905	62623074	promoter-TSS (NR_002562)	promoter-TSS (NR_002562)	114	NR_002565	9303		NR_002565		SNORD25	RNU25|U25	small nucleolar RNA, C/D box 25	snoRNA
chr11	66809551	66809720	intron (NM_177963, intron 4 of 7)	MIR|SINE|MIR	-14654	NM_014578	29984	Hs.15114	NM_014578	ENSG00000173156	RHOD	ARHD|RHOHP1|RHOM|Rho	ras homolog family member D	protein-coding
chr11	65423930	65424099	intron (NM_001243985, intron 8 of 11)	intron (NM_001243985, intron 8 of 11)	6429	NM_021975	5970	Hs.502875	NM_001145138	ENSG00000173039	RELA	NFKB3|p65	v-rel reticuloendotheliosis viral oncogene homolog A (avian)	protein-coding
chr11	46898793	46898962	exon (NM_002334, exon 23 of 38)	exon (NM_002334, exon 23 of 38)	30915	NR_038909	100507401	Hs.675301	NR_038909		LRP4-AS1	-	LRP4 antisense RNA 1	miscRNA
chr11	59323833	59324002	Intergenic	tRNA-Lys-AAA|tRNA|tRNA	38714	NR_036120	100422880		NR_036120		MIR3162	-	microRNA 3162	miscRNA
chr11	29141601	29141770	Intergenic	Intergenic	896892	NM_002233	3739	Hs.592002	NM_002233	ENSG00000182255	KCNA4	HBK4|HK1|HPCN2|HUKII|KCNA4L|KCNA8|KV1.4|PCN2	potassium voltage-gated channel, shaker-related subfamily, member 4	protein-coding
chr11	62000693	62000862	Intergenic	Intergenic	-8947	NM_006551	10647	Hs.204096	NM_006551	ENSG00000124935	SCGB1D2	LIPB|LPHB	secretoglobin, family 1D, member 2	protein-coding
chr11	66135594	66135763	intron (NM_001532, intron 5 of 11)	MIRb|SINE|MIR	3613	NM_001532	3177	Hs.569017	NM_001532	ENSG00000174669	SLC29A2	DER12|ENT2|HNP36	solute carrier family 29 (nucleoside transporters), member 2	protein-coding
chr11	36615850	36616019	promoter-TSS (NM_138787)	promoter-TSS (NM_138787)	-159	NM_138787	119710	Hs.159376	NM_138787	ENSG00000166352	C11orf74	-	chromosome 11 open reading frame 74	protein-coding
chr11	475051	475220	intron (NM_030783, intron 3 of 11)	intron (NM_030783, intron 3 of 11)	24855	NM_030783	81490	Hs.731700	NM_030783	ENSG00000174915	PTDSS2	PSS2	phosphatidylserine synthase 2	protein-coding
chr11	14444237	14444406	Intergenic	Intergenic	-58269	NM_001177314	22800	Hs.712835	NM_001102669	ENSG00000133818	RRAS2	TC21	related RAS viral (r-ras) oncogene homolog 2	protein-coding
chr11	65194448	65194617	TTS (NR_028272)	TTS (NR_028272)	4263	NR_028272	283131	Hs.523789	NR_002802		NEAT1	LINC00084|NCRNA00084|TncRNA	nuclear paraspeckle assembly transcript 1 (non-protein coding)	miscRNA
chr11	68227570	68227739	promoter-TSS (NM_018312)	promoter-TSS (NM_018312)	-532	NM_001164163	55291	Hs.503022	NM_001164160	ENSG00000110075	PPP6R3	C11orf23|PP6R3|SAP190|SAPL|SAPLa|SAPS3	protein phosphatase 6, regulatory subunit 3	protein-coding
chr11	63163275	63163444	intron (NM_080866, intron 6 of 9)	L1PBa1|LINE|L1	26098	NM_080866	114571	Hs.502772	NM_080866	ENSG00000149742	SLC22A9	HOAT4|OAT4|OAT7|UST3H|ust3	solute carrier family 22 (organic anion transporter), member 9	protein-coding
chr11	34126768	34126937	promoter-TSS (NM_001144030)	promoter-TSS (NM_001144030)	-259	NM_024662	55226	Hs.577281	NM_001144030	ENSG00000135372	NAT10	ALP|NET43	N-acetyltransferase 10 (GCN5-related)	protein-coding
chr11	34702867	34703036	Intergenic	Intergenic	48940	NM_001206616	26298	Hs.653859	NM_001206615	ENSG00000135373	EHF	ESE3|ESE3B|ESEJ	ets homologous factor	protein-coding
chr11	27012964	27013133	Intergenic	Intergenic	-2580	NM_203371	387758	Hs.712718	NM_203371	ENSG00000176971	FIBIN	-	fin bud initiation factor homolog (zebrafish)	protein-coding
chr11	65484791	65484960	TTS (NM_032193)	TTS (NM_032193)	3534	NM_032193	84153	Hs.718438	NM_032193	ENSG00000172922	RNASEH2C	AGS3|AYP1	ribonuclease H2, subunit C	protein-coding
chr11	17537530	17537699	intron (NM_153676, intron 15 of 26)	intron (NM_153676, intron 15 of 26)	28349	NM_153676	10083	Hs.502072	NM_005709	ENSG00000006611	USH1C	AIE-75|DFNB18|NY-CO-37|NY-CO-38|PDZ-45|PDZ-73|PDZ-73/NY-CO-38|PDZ73|ush1cpst	Usher syndrome 1C (autosomal recessive, severe)	protein-coding
chr11	62609040	62609209	Intergenic	U2|snRNA|snRNA	-1496	NM_018093	54663	Hs.654620	NM_018093	ENSG00000133316	WDR74	-	WD repeat domain 74	protein-coding
chr11	64099059	64099228	Intergenic	(TG)n|Simple_repeat|Simple_repeat	-8547	NM_032251	283234	Hs.98564	NM_032251	ENSG00000168071	CCDC88B	BRLZ|CCDC88|HKRP3|gipie	coiled-coil domain containing 88B	protein-coding
chr11	12087877	12088046	Intergenic	MLT1F2|LTR|ERVL-MaLR	-44177	NM_014632	9645	Hs.501928	NM_014632	ENSG00000133816	MICAL2	MICAL-2|MICAL2PV1|MICAL2PV2	microtubule associated monoxygenase, calponin and LIM domain containing 2	protein-coding
chr11	59474437	59474606	Intergenic	LTR3|LTR|ERVK	6797	NM_001005324	390201	Hs.589001	NM_001005324	ENSG00000172289	OR10V1	OR11-256	olfactory receptor, family 10, subfamily V, member 1	protein-coding
chr11	67031734	67031903	Intergenic	Intergenic	-2087	NM_001619	156	Hs.83636	NM_001619	ENSG00000173020	ADRBK1	BARK1|BETA-ARK1|GRK2	adrenergic, beta, receptor kinase 1	protein-coding
chr11	65267977	65268146	non-coding (NR_002819, exon 1 of 1)	non-coding (NR_002819, exon 1 of 1)	2828	NR_002819	378938	Hs.642877	NR_002819		MALAT1	HCN|LINC00047|MALAT-1|NCRNA00047|NEAT2|PRO2853	metastasis associated lung adenocarcinoma transcript 1 (non-protein coding)	miscRNA
chr11	65363498	65363667	promoter-TSS (NM_033455)	promoter-TSS (NM_033455)	-115	NM_033347	10089	Hs.175218	NM_005714	ENSG00000173338	KCNK7	K2p7.1|TWIK3	potassium channel, subfamily K, member 7	protein-coding
chr11	64178277	64178446	Intergenic	Intergenic	-38168	NR_073177	100996455	Hs.634142	XM_003846433	ENSG00000181908	LOC100996455	-	uncharacterized LOC100996455	miscRNA
chr11	62173429	62173598	Intergenic	Intergenic	-12994	NM_003357	7356	Hs.523732	NM_003357	ENSG00000149021	SCGB1A1	CC10|CC16|CCPBP|CCSP|UGB|UP-1|UP1	secretoglobin, family 1A, member 1 (uteroglobin)	protein-coding
chr11	3632463	3632632	Intergenic	Intergenic	-15143	NR_002720	7221	Hs.690732	NR_002720		TRPC2	-	transient receptor potential cation channel, subfamily C, member 2, pseudogene	pseudo
chr11	64279817	64279986	Intergenic	Intergenic	-43197	NM_018484	55867	Hs.220844	NM_018484	ENSG00000168065	SLC22A11	OAT4|hOAT4	solute carrier family 22 (organic anion/urate transporter), member 11	protein-coding
chr11	40350793	40350962	intron (NM_001258419, intron 3 of 6)	intron (NM_001258419, intron 3 of 6)	-36197	NR_047673	57689	Hs.741547	NM_001258419	ENSG00000148948	LRRC4C	NGL-1|NGL1	leucine rich repeat containing 4C	protein-coding
chr11	61663220	61663389	Intergenic	MIR|SINE|MIR	-4298	NM_021727	3995	Hs.21765	NM_021727	ENSG00000221968	FADS3	CYB5RP|LLCDL3	fatty acid desaturase 3	protein-coding
chr11	66185375	66185544	Intergenic	(CA)n|Simple_repeat|Simple_repeat	-3016	NM_178864	266743	Hs.256036	NM_178864	ENSG00000174576	NPAS4	Le-PAS|NXF|PASD10|bHLHe79	neuronal PAS domain protein 4	protein-coding
chr11	65769212	65769381	promoter-TSS (NM_003860)	promoter-TSS (NM_003860)	-254	NM_003860	8815	Hs.433759	NM_001143985	ENSG00000175334	BANF1	BAF|BCRP1|D14S1460|NGPS	barrier to autointegration factor 1	protein-coding
chr11	68849810	68849979	intron (NM_139075, intron 18 of 24)	intron (NM_139075, intron 18 of 24)	33544	NM_139075	219931	Hs.131851	NM_139075	ENSG00000162341	TPCN2	SHEP10|TPC2	two pore segment channel 2	protein-coding
chr11	67089317	67089486	intron (NR_024469, intron 2 of 3)	intron (NR_024469, intron 2 of 3)	4091	NR_024469	100130987	Hs.664585	NR_024469		LOC100130987	-	uncharacterized LOC100130987	miscRNA
chr11	75946479	75946648	Intergenic	CpG	-28989	NM_004626	7481	Hs.108219	NM_004626	ENSG00000085741	WNT11	HWNT11	wingless-type MMTV integration site family, member 11	protein-coding
chr11	55920643	55920812	Intergenic	MLT2A2|LTR|ERVL	7066	NM_001004058	219453	Hs.553626	NM_001004058	ENSG00000181752	OR8K5	OR11-174	olfactory receptor, family 8, subfamily K, member 5	protein-coding
chr11	64427376	64427545	intron (NM_015080, intron 11 of 22)	intron (NM_015080, intron 11 of 22)	-16673	NM_138734	9379	Hs.372938	NM_015080	ENSG00000110076	NRXN2	-	neurexin 2	protein-coding
chr11	66654045	66654214	intron (NM_000920, intron 2 of 21)	L2|LINE|L2	21211	NM_022172	5091	Hs.89890	NM_000920	ENSG00000173599	PC	PCB	pyruvate carboxylase	protein-coding
chr11	59333661	59333830	Intergenic	Intergenic	28886	NR_036120	100422880		NR_036120		MIR3162	-	microRNA 3162	miscRNA
chr11	61254835	61255004	intron (NM_145017, intron 11 of 13)	LTR16C|LTR|ERVL	6334	NM_001170753	220004	Hs.729003	NM_001170753	ENSG00000162148	PPP1R32	C11orf66|IIIG9	protein phosphatase 1, regulatory subunit 32	protein-coding
chr11	65682335	65682504	Intergenic	L2c|LINE|L2	4112	NM_031450	83638	Hs.433573	NM_001135635	ENSG00000175573	C11orf68	BLES03|P5326	chromosome 11 open reading frame 68	protein-coding
chr11	35358875	35359044	intron (NM_001195728, intron 1 of 11)	intron (NM_001195728, intron 1 of 11)	82146	NM_004171	6506	Hs.502338	NM_001195728	ENSG00000110436	SLC1A2	EAAT2|GLT-1	solute carrier family 1 (glial high affinity glutamate transporter), member 2	protein-coding
chr11	1148947	1149116	Intergenic	(CTCA)n|Simple_repeat|Simple_repeat	74156	NM_002457	4583	Hs.315	NM_002457	ENSG00000198788	MUC2	MLP|MUC-2|SMUC	mucin 2, oligomeric mucus/gel-forming	protein-coding
chr11	33744819	33744988	promoter-TSS (NM_001127225)	promoter-TSS (NM_001127225)	-405	NM_001127227	966	Hs.710641	NM_000611	ENSG00000085063	CD59	16.3A5|1F5|EJ16|EJ30|EL32|G344|HRF-20|HRF20|MAC-IP|MACIF|MEM43|MIC11|MIN1|MIN2|MIN3|MIRL|MSK21|p18-20	CD59 molecule, complement regulatory protein	protein-coding
chr11	14358757	14358926	intron (NM_001177314, intron 1 of 5)	MER44D|DNA|TcMar-Tigger	21190	NM_001177315	22800	Hs.712835	NM_001102669	ENSG00000133818	RRAS2	TC21	related RAS viral (r-ras) oncogene homolog 2	protein-coding
chr11	1089399	1089568	intron (NM_002457, intron 26 of 49)	(CA)n|Simple_repeat|Simple_repeat	14608	NM_002457	4583	Hs.315	NM_002457	ENSG00000198788	MUC2	MLP|MUC-2|SMUC	mucin 2, oligomeric mucus/gel-forming	protein-coding
chr11	61793274	61793443	Intergenic	Intergenic	-58226	NM_002032	2495	Hs.645560	NM_002032	ENSG00000167996	FTH1	FHC|FTH|FTHL6|PIG15|PLIF	ferritin, heavy polypeptide 1	protein-coding
chr11	35236359	35236528	exon (NM_000610, exon 15 of 18)	exon (NM_000610, exon 15 of 18)	76026	NM_001202556	960	Hs.502328	NM_000610	ENSG00000026508	CD44	CDW44|CSPG8|ECMR-III|HCELL|HUTCH-I|IN|LHR|MC56|MDU2|MDU3|MIC4|Pgp1	CD44 molecule (Indian blood group)	protein-coding
chr11	65601735	65601904	intron (NM_152760, intron 1 of 12)	(TG)n|Simple_repeat|Simple_repeat	409	NM_152760	254122	Hs.591950	NM_152760	ENSG00000172803	SNX32	SNX6B	sorting nexin 32	protein-coding
chr11	64696699	64696868	intron (NM_006244, intron 6 of 13)	intron (NM_006244, intron 6 of 13)	4640	NM_006244	5526	Hs.75199	NM_006244	ENSG00000068971	PPP2R5B	B56B|PR61B	protein phosphatase 2, regulatory subunit B', beta	protein-coding
chr11	66659731	66659900	intron (NM_000920, intron 2 of 21)	intron (NM_000920, intron 2 of 21)	15525	NM_022172	5091	Hs.89890	NM_000920	ENSG00000173599	PC	PCB	pyruvate carboxylase	protein-coding
chr11	125025102	125025271	Intergenic	(TG)n|Simple_repeat|Simple_repeat	-9373	NM_022062	63876	Hs.278564	NM_022062	ENSG00000165495	PKNOX2	PREP2	PBX/knotted 1 homeobox 2	protein-coding
chr11	61223164	61223333	Intergenic	L2a|LINE|L2	-25337	NM_145017	220004	Hs.729003	NM_001170753	ENSG00000162148	PPP1R32	C11orf66|IIIG9	protein phosphatase 1, regulatory subunit 32	protein-coding
chr11	64463766	64463935	intron (NM_015080, intron 3 of 22)	intron (NM_015080, intron 3 of 22)	26810	NM_138732	9379	Hs.372938	NM_015080	ENSG00000110076	NRXN2	-	neurexin 2	protein-coding
chr11	66157196	66157365	Intergenic	Intergenic	-17989	NM_001532	3177	Hs.569017	NM_001532	ENSG00000174669	SLC29A2	DER12|ENT2|HNP36	solute carrier family 29 (nucleoside transporters), member 2	protein-coding
chr11	65187786	65187955	Intergenic	Intergenic	-2399	NR_028272	283131	Hs.523789	NR_002802		NEAT1	LINC00084|NCRNA00084|TncRNA	nuclear paraspeckle assembly transcript 1 (non-protein coding)	miscRNA
chr11	61833022	61833191	Intergenic	Intergenic	-58339	NM_001040694	3619	Hs.142179	NM_001040694	ENSG00000149503	INCENP	-	inner centromere protein antigens 135/155kDa	protein-coding
chr11	59318060	59318229	Intergenic	tRNA-Val-GTA|tRNA|tRNA	35758	NM_001004711	390199	Hs.553757	NM_001004711	ENSG00000172742	OR4D9	OR11-253	olfactory receptor, family 4, subfamily D, member 9	protein-coding
chr11	28787826	28787995	Intergenic	L1M1|LINE|L1	658112	NM_001113528	196074	Hs.243326	NM_001113528	ENSG00000169519	METTL15	METT5D1	methyltransferase like 15	protein-coding
chr11	61360743	61360912	Intergenic	L2a|LINE|L2	-12483	NM_001252065	9066	Hs.684589	NM_001252065	ENSG00000011347	SYT7	IPCA-7|IPCA7|PCANAP7|SYT-VII|SYTVII	synaptotagmin VII	protein-coding
chr11	65420545	65420714	TTS (NM_001145138)	TTS (NM_001145138)	3966	NR_039709	100616284		NR_039709		MIR4489	-	microRNA 4489	miscRNA
chr11	114167152	114167321	5' UTR (NM_006169, exon 1 of 3)	5' UTR (NM_006169, exon 1 of 3)	701	NM_006169	4837	Hs.503911	NM_006169	ENSG00000166741	NNMT	-	nicotinamide N-methyltransferase	protein-coding
chr11	61726963	61727132	exon (NM_004183, exon 8 of 11)	exon (NM_004183, exon 8 of 11)	8085	NM_002032	2495	Hs.645560	NM_002032	ENSG00000167996	FTH1	FHC|FTH|FTHL6|PIG15|PLIF	ferritin, heavy polypeptide 1	protein-coding
chr11	64774279	64774448	Intergenic	L3|LINE|CR1	-7222	NM_001667	402	Hs.502836	NM_001199745	ENSG00000213465	ARL2	ARFL2	ADP-ribosylation factor-like 2	protein-coding
chr11	63366318	63366487	intron (NM_007069, intron 1 of 3)	intron (NM_007069, intron 1 of 3)	15507	NM_007069	11145	Hs.502775	NM_001128203	ENSG00000176485	PLA2G16	AdPLA|H-REV107-1|HRASLS3|HREV107|HREV107-1|HREV107-3|HRSL3	phospholipase A2, group XVI	protein-coding
chr11	35651663	35651832	Intergenic	Intergenic	12012	NM_014344	24147	Hs.39384	NM_014344	ENSG00000179431	FJX1	-	four jointed box 1 (Drosophila)	protein-coding
chr11	63298980	63299149	intron (NR_049833, intron 1 of 3)	MER66C|LTR|ERV1	-5209	NM_004585	5920	Hs.17466	NM_004585	ENSG00000133321	RARRES3	HRASLS4|PLA1/2-3|RIG1|TIG3	retinoic acid receptor responder (tazarotene induced) 3	protein-coding
chr11	65604833	65605002	intron (NM_152760, intron 1 of 12)	AluJr4|SINE|Alu	3507	NM_152760	254122	Hs.591950	NM_152760	ENSG00000172803	SNX32	SNX6B	sorting nexin 32	protein-coding
chr11	61452856	61453025	intron (NM_006133, intron 1 of 19)	intron (NM_006133, intron 1 of 19)	5035	NM_006133	747	Hs.241564	NM_006133	ENSG00000134780	DAGLA	C11orf11|DAGL(ALPHA)|DAGLALPHA|NSDDR	diacylglycerol lipase, alpha	protein-coding
chr11	62684979	62685148	intron (NM_000738, intron 1 of 1)	intron (NM_000738, intron 1 of 1)	3949	NM_000738	1128	Hs.632119	NM_000738	ENSG00000168539	CHRM1	HM1|M1|M1R	cholinergic receptor, muscarinic 1	protein-coding
chr11	59324947	59325116	Intergenic	tRNA-Phe-TTY|tRNA|tRNA	37600	NR_036120	100422880		NR_036120		MIR3162	-	microRNA 3162	miscRNA
chr11	66823092	66823261	Intergenic	Intergenic	-1113	NM_014578	29984	Hs.15114	NM_014578	ENSG00000173156	RHOD	ARHD|RHOHP1|RHOM|Rho	ras homolog family member D	protein-coding
chr11	64427437	64427606	intron (NM_015080, intron 11 of 22)	intron (NM_015080, intron 11 of 22)	-16734	NM_138734	9379	Hs.372938	NM_015080	ENSG00000110076	NRXN2	-	neurexin 2	protein-coding
chr11	64973528	64973697	intron (NM_001198869, intron 12 of 21)	intron (NM_001198869, intron 12 of 21)	-7699	NR_033396	440044	Hs.532372	NM_001004326		SLC22A20	Oat6	solute carrier family 22, member 20	protein-coding
chr11	71852228	71852397	Intergenic	L1MC4|LINE|L1	5541	NM_000804	2352	Hs.352	NM_000804	ENSG00000110203	FOLR3	FR-G|FR-gamma|gamma-hFR	folate receptor 3 (gamma)	protein-coding
chr11	59323795	59323964	Intergenic	Intergenic	38752	NR_036120	100422880		NR_036120		MIR3162	-	microRNA 3162	miscRNA
chr11	60086584	60086753	Intergenic	L1MA9|LINE|L1	-15687	NM_139249	245802	Hs.662211	NM_139249	ENSG00000166926	MS4A6E	-	membrane-spanning 4-domains, subfamily A, member 6E	protein-coding
chr11	64774428	64774597	Intergenic	Intergenic	-7073	NM_001667	402	Hs.502836	NM_001199745	ENSG00000213465	ARL2	ARFL2	ADP-ribosylation factor-like 2	protein-coding
chr11	94479567	94479736	Intergenic	Intergenic	-21857	NM_130847	154810	Hs.503594	NM_130847	ENSG00000166025	AMOTL1	JEAP	angiomotin like 1	protein-coding
chr11	2450244	2450413	Intergenic	(TGG)n|Simple_repeat|Simple_repeat	-6053	NM_014555	29850	Hs.272287	NM_014555	ENSG00000070985	TRPM5	LTRPC5|MTR1	transient receptor potential cation channel, subfamily M, member 5	protein-coding
chr11	64435398	64435567	intron (NM_015080, intron 8 of 22)	MIRc|SINE|MIR	-24695	NM_138734	9379	Hs.372938	NM_015080	ENSG00000110076	NRXN2	-	neurexin 2	protein-coding
chr11	62650252	62650421	intron (NM_001013251, intron 2 of 8)	intron (NM_001013251, intron 2 of 8)	1165	NR_037193	6520	Hs.502769	NM_001012662	ENSG00000168003	SLC3A2	4F2|4F2HC|4T2HC|CD98|CD98HC|MDU1|NACAE	solute carrier family 3 (activators of dibasic and neutral amino acid transport), member 2	protein-coding
chr11	57225184	57225353	Intergenic	MIR3|SINE|MIR	-3071	NM_178570	349667	Hs.502618	NM_178570	ENSG00000186907	RTN4RL2	NGRH1|NgR2	reticulon 4 receptor-like 2	protein-coding
chr11	63956137	63956306	intron (NM_006819, intron 1 of 13)	intron (NM_006819, intron 1 of 13)	2634	NM_006819	10963	Hs.337295	NM_006819	ENSG00000168439	STIP1	HOP|IEF-SSP-3521|P60|STI1|STI1L	stress-induced-phosphoprotein 1	protein-coding
chr11	12197573	12197742	intron (NM_014632, intron 3 of 27)	intron (NM_014632, intron 3 of 27)	65519	NM_014632	9645	Hs.501928	NM_014632	ENSG00000133816	MICAL2	MICAL-2|MICAL2PV1|MICAL2PV2	microtubule associated monoxygenase, calponin and LIM domain containing 2	protein-coding
chr11	9781161	9781330	promoter-TSS (NR_033972)	promoter-TSS (NR_033972)	-165	NR_033972	440028	Hs.677541	NR_033972		LOC440028	-	uncharacterized LOC440028	miscRNA
chr11	129509249	129509418	Intergenic	Intergenic	-176408	NM_138788	120224	Hs.504301	NM_138788	ENSG00000151715	TMEM45B	-	transmembrane protein 45B	protein-coding
chr11	134462297	134462466	Intergenic	LTR53|LTR|ERVL	156005	NR_033852	283177	Hs.504390	NR_033852		LOC283177	-	uncharacterized LOC283177	miscRNA
chr11	45278421	45278590	intron (NM_020826, intron 1 of 5)	L2c|LINE|L2	29379	NM_020826	57586	Hs.436643	NM_001247987	ENSG00000019505	SYT13	-	synaptotagmin XIII	protein-coding
chr11	66822385	66822554	Intergenic	MIRb|SINE|MIR	-1820	NM_014578	29984	Hs.15114	NM_014578	ENSG00000173156	RHOD	ARHD|RHOHP1|RHOM|Rho	ras homolog family member D	protein-coding
chr11	3744364	3744533	exon (NM_139132, exon 16 of 32)	exon (NM_139132, exon 16 of 32)	-51834	NM_020402	57053	Hs.732806	NM_020402	ENSG00000129749	CHRNA10	-	cholinergic receptor, nicotinic, alpha 10 (neuronal)	protein-coding
chr11	27048728	27048897	Intergenic	MLT1I|LTR|ERVL-MaLR	-13697	NM_003986	8424	Hs.591996	NM_003986	ENSG00000129151	BBOX1	BBH|BBOX|G-BBH|gamma-BBH	butyrobetaine (gamma), 2-oxoglutarate dioxygenase (gamma-butyrobetaine hydroxylase) 1	protein-coding
chr11	64475822	64475991	intron (NM_015080, intron 2 of 22)	intron (NM_015080, intron 2 of 22)	14754	NM_138732	9379	Hs.372938	NM_015080	ENSG00000110076	NRXN2	-	neurexin 2	protein-coding
chr11	27255853	27256022	Intergenic	Intergenic	128858	NM_030771	91057	Hs.143733	NM_030771	ENSG00000109881	CCDC34	NY-REN-41|RAMA3	coiled-coil domain containing 34	protein-coding
chr11	75946529	75946698	Intergenic	CpG	-29039	NM_004626	7481	Hs.108219	NM_004626	ENSG00000085741	WNT11	HWNT11	wingless-type MMTV integration site family, member 11	protein-coding
chr11	63604834	63605003	Intergenic	Intergenic	-1482	NM_001163297	2011	Hs.567261	NM_001039469	ENSG00000072518	MARK2	EMK-1|EMK1|PAR-1|Par-1b|Par1b	MAP/microtubule affinity-regulating kinase 2	protein-coding
chr11	475148	475317	intron (NM_030783, intron 3 of 11)	intron (NM_030783, intron 3 of 11)	24952	NM_030783	81490	Hs.731700	NM_030783	ENSG00000174915	PTDSS2	PSS2	phosphatidylserine synthase 2	protein-coding
chr11	40467019	40467188	intron (NM_001258419, intron 3 of 6)	intron (NM_001258419, intron 3 of 6)	-152423	NR_047673	57689	Hs.741547	NM_001258419	ENSG00000148948	LRRC4C	NGL-1|NGL1	leucine rich repeat containing 4C	protein-coding
chr11	63927744	63927913	intron (NM_014067, intron 1 of 10)	MamRep605|Unknown|Unknown	5757	NM_014067	28992	Hs.602898	NM_014067	ENSG00000133315	MACROD1	LRP16	MACRO domain containing 1	protein-coding
chr11	59586795	59586964	Intergenic	(TG)n|Simple_repeat|Simple_repeat	-8534	NM_017840	54948	Hs.530734	NM_017840	ENSG00000166902	MRPL16	L16mt|MRP-L16	mitochondrial ribosomal protein L16	protein-coding
chr11	3228166	3228335	Intergenic	(ATG)n|Simple_repeat|Simple_repeat	-11312	NR_027138	283303	Hs.151154	NM_173590		MRGPRG-AS1	C11orf36|HSD-40	MRGPRG antisense RNA 1	miscRNA
chr11	117359280	117359449	intron (NM_020693, intron 11 of 32)	intron (NM_020693, intron 11 of 32)	160793	NM_014956	22897	Hs.504009	NM_014956	ENSG00000110274	CEP164	NPHP15	centrosomal protein 164kDa	protein-coding
chr11	65656532	65656701	promoter-TSS (NM_004214)	promoter-TSS (NM_004214)	-606	NM_198897	9158	Hs.7768	NM_004214	ENSG00000172500	FIBP	FGFIBP|FIBP-1	fibroblast growth factor (acidic) intracellular binding protein	protein-coding
chr11	61729072	61729241	intron (NM_001139443, intron 8 of 8)	intron (NM_001139443, intron 8 of 8)	5976	NM_002032	2495	Hs.645560	NM_002032	ENSG00000167996	FTH1	FHC|FTH|FTHL6|PIG15|PLIF	ferritin, heavy polypeptide 1	protein-coding
chr11	65108543	65108712	intron (NM_006268, intron 3 of 10)	L2c|LINE|L2	7402	NM_006268	5977	Hs.13495	NM_006268	ENSG00000133884	DPF2	REQ|UBID4|ubi-d4	D4, zinc and double PHD fingers family 2	protein-coding
chr11	128077971	128078140	Intergenic	Intergenic	314150	NM_005238	2113	Hs.369438	NM_001143820	ENSG00000134954	ETS1	ETS-1|EWSR2	v-ets erythroblastosis virus E26 oncogene homolog 1 (avian)	protein-coding
chr11	18074639	18074808	Intergenic	U2|snRNA|snRNA	-12388	NM_004179	7166	Hs.591999	NM_004179	ENSG00000129167	TPH1	TPRH|TRPH	tryptophan hydroxylase 1	protein-coding
chr11	5301862	5302031	Intergenic	Intergenic	-10573	NM_005330	3046	Hs.655195	NM_005330	ENSG00000213931	HBE1	HBE	hemoglobin, epsilon 1	protein-coding
chr11	12159825	12159994	intron (NM_014632, intron 1 of 27)	intron (NM_014632, intron 1 of 27)	27771	NM_014632	9645	Hs.501928	NM_014632	ENSG00000133816	MICAL2	MICAL-2|MICAL2PV1|MICAL2PV2	microtubule associated monoxygenase, calponin and LIM domain containing 2	protein-coding
chr11	14381180	14381349	promoter-TSS (NM_012250)	promoter-TSS (NM_012250)	-534	NM_012250	22800	Hs.712835	NM_001102669	ENSG00000133818	RRAS2	TC21	related RAS viral (r-ras) oncogene homolog 2	protein-coding
chr11	44530427	44530596	Intergenic	L2c|LINE|L2	-56630	NM_002231	3732	Hs.527778	NM_001024844	ENSG00000085117	CD82	4F9|C33|GR15|IA4|KAI1|R2|SAR2|ST6|TSPAN27	CD82 molecule	protein-coding
chr11	60327902	60328071	Intergenic	Intergenic	45100	NM_001100909	503497	Hs.523704	NM_001012417	ENSG00000204979	MS4A13	-	membrane-spanning 4-domains, subfamily A, member 13	protein-coding
chr11	65190216	65190385	promoter-TSS (NR_028272)	promoter-TSS (NR_028272)	31	NR_028272	283131	Hs.523789	NR_002802		NEAT1	LINC00084|NCRNA00084|TncRNA	nuclear paraspeckle assembly transcript 1 (non-protein coding)	miscRNA
chr11	59474393	59474562	Intergenic	LTR3|LTR|ERVK	6841	NM_001005324	390201	Hs.589001	NM_001005324	ENSG00000172289	OR10V1	OR11-256	olfactory receptor, family 10, subfamily V, member 1	protein-coding
chr11	28855390	28855559	Intergenic	L2c|LINE|L2	725676	NM_001113528	196074	Hs.243326	NM_001113528	ENSG00000169519	METTL15	METT5D1	methyltransferase like 15	protein-coding
chr11	66768715	66768884	Intergenic	L1M5|LINE|L1	-21391	NM_001177880	91683	Hs.287636	NM_001177880	ENSG00000173227	SYT12	SYT11|sytXII	synaptotagmin XII	protein-coding
chr11	19492341	19492510	intron (NM_001111018, intron 1 of 37)	LTR33|LTR|ERVL	36351	NR_049725	100874012	Hs.434602	NR_049725		NAV2-AS5	-	NAV2 antisense RNA 5	miscRNA
chr11	46527581	46527750	intron (NM_001267783, intron 9 of 17)	intron (NM_001267783, intron 9 of 17)	-54226	NR_036117	100422827		NR_036117		MIR3160-1	-	microRNA 3160-1	miscRNA
chr11	65382643	65382812	Intergenic	Intergenic	-1007	NM_002419	4296	Hs.502872	NM_002419	ENSG00000173327	MAP3K11	MEKK11|MLK-3|MLK3|PTK1|SPRK	mitogen-activated protein kinase kinase kinase 11	protein-coding
chr11	65254588	65254757	Intergenic	Intergenic	-10561	NR_002819	378938	Hs.642877	NR_002819		MALAT1	HCN|LINC00047|MALAT-1|NCRNA00047|NEAT2|PRO2853	metastasis associated lung adenocarcinoma transcript 1 (non-protein coding)	miscRNA
chr11	59319168	59319337	Intergenic	tRNA-Leu-TTA|tRNA|tRNA	36866	NM_001004711	390199	Hs.553757	NM_001004711	ENSG00000172742	OR4D9	OR11-253	olfactory receptor, family 4, subfamily D, member 9	protein-coding
chr11	9587646	9587815	Intergenic	Intergenic	-7498	NM_003390	7465	Hs.249441	NM_001143976	ENSG00000166483	WEE1	WEE1A|WEE1hu	WEE1 homolog (S. pombe)	protein-coding
chr11	57194890	57195059	promoter-TSS (NM_017611)	promoter-TSS (NM_017611)	79	NM_017611	29015	Hs.99962	NM_014096	ENSG00000134802	SLC43A3	EEG1|FOAP-13|PRO1659|SEEEG-1	solute carrier family 43, member 3	protein-coding
chr11	64362002	64362171	intron (NM_144585, intron 4 of 9)	(TGGA)n|Simple_repeat|Simple_repeat	3804	NM_144585	116085	Hs.174424	NM_144585	ENSG00000197891	SLC22A12	OAT4L|RST|URAT1	solute carrier family 22 (organic anion/urate transporter), member 12	protein-coding
chr11	66190905	66191074	intron (NM_178864, intron 5 of 7)	intron (NM_178864, intron 5 of 7)	2514	NM_178864	266743	Hs.256036	NM_178864	ENSG00000174576	NPAS4	Le-PAS|NXF|PASD10|bHLHe79	neuronal PAS domain protein 4	protein-coding
chr11	32170874	32171043	Intergenic	LTR72|LTR|ERV1	58481	NM_002901	5954	Hs.97887	NM_002901	ENSG00000049449	RCN1	PIG20|RCAL|RCN	reticulocalbin 1, EF-hand calcium binding domain	protein-coding
chr11	35358888	35359057	intron (NM_001195728, intron 1 of 11)	intron (NM_001195728, intron 1 of 11)	82133	NM_004171	6506	Hs.502338	NM_001195728	ENSG00000110436	SLC1A2	EAAT2|GLT-1	solute carrier family 1 (glial high affinity glutamate transporter), member 2	protein-coding
chr11	129830210	129830379	intron (NM_020228, intron 2 of 21)	MARNA|DNA|TcMar-Mariner	-12777	NM_199438	56980	Hs.275086	NM_020228	ENSG00000170325	PRDM10	PFM7	PR domain containing 10	protein-coding
chr11	66115491	66115660	promoter-TSS (NM_006876)	promoter-TSS (NM_006876)	-414	NM_006876	11041	Hs.8526	NM_006876	ENSG00000174684	B3GNT1	B3GN-T1|B3GNT6|BETA3GNTI|iGAT|iGNT	UDP-GlcNAc:betaGal beta-1,3-N-acetylglucosaminyltransferase 1	protein-coding
chr11	34666389	34666558	intron (NM_001206616, intron 2 of 8)	intron (NM_001206616, intron 2 of 8)	12462	NM_001206616	26298	Hs.653859	NM_001206615	ENSG00000135373	EHF	ESE3|ESE3B|ESEJ	ets homologous factor	protein-coding
chr11	35427665	35427834	intron (NM_001252652, intron 1 of 11)	L2b|LINE|L2	13356	NM_004171	6506	Hs.502338	NM_001195728	ENSG00000110436	SLC1A2	EAAT2|GLT-1	solute carrier family 1 (glial high affinity glutamate transporter), member 2	protein-coding
chr11	62649397	62649566	exon (NM_002394, exon 5 of 12)	exon (NM_002394, exon 5 of 12)	310	NR_037193	6520	Hs.502769	NM_001012662	ENSG00000168003	SLC3A2	4F2|4F2HC|4T2HC|CD98|CD98HC|MDU1|NACAE	solute carrier family 3 (activators of dibasic and neutral amino acid transport), member 2	protein-coding
chr11	59318457	59318626	Intergenic	Intergenic	36155	NM_001004711	390199	Hs.553757	NM_001004711	ENSG00000172742	OR4D9	OR11-253	olfactory receptor, family 4, subfamily D, member 9	protein-coding
chr11	40898944	40899113	intron (NM_020929, intron 1 of 4)	Charlie3|DNA|hAT-Charlie	582158	NM_001258419	57689	Hs.741547	NM_001258419	ENSG00000148948	LRRC4C	NGL-1|NGL1	leucine rich repeat containing 4C	protein-coding
chr11	36171365	36171534	intron (NM_174902, intron 4 of 5)	intron (NM_174902, intron 4 of 5)	139550	NM_001101653	29099	Hs.279836	NM_001101653	ENSG00000110442	COMMD9	-	COMM domain containing 9	protein-coding
chr11	35209669	35209838	intron (NM_001001389, intron 4 of 16)	intron (NM_001001389, intron 4 of 16)	49336	NM_001202556	960	Hs.502328	NM_000610	ENSG00000026508	CD44	CDW44|CSPG8|ECMR-III|HCELL|HUTCH-I|IN|LHR|MC56|MDU2|MDU3|MIC4|Pgp1	CD44 molecule (Indian blood group)	protein-coding
chr11	29290808	29290977	Intergenic	Intergenic	747685	NM_002233	3739	Hs.592002	NM_002233	ENSG00000182255	KCNA4	HBK4|HK1|HPCN2|HUKII|KCNA4L|KCNA8|KV1.4|PCN2	potassium voltage-gated channel, shaker-related subfamily, member 4	protein-coding
chr11	9587699	9587868	Intergenic	Intergenic	-7445	NM_003390	7465	Hs.249441	NM_001143976	ENSG00000166483	WEE1	WEE1A|WEE1hu	WEE1 homolog (S. pombe)	protein-coding
chr11	65682423	65682592	Intergenic	Intergenic	4024	NM_031450	83638	Hs.433573	NM_001135635	ENSG00000175573	C11orf68	BLES03|P5326	chromosome 11 open reading frame 68	protein-coding
chr11	62060832	62061001	Intergenic	L1MB4|LINE|L1	5620	NM_206998	404552	Hs.473247	NM_206998	ENSG00000197745	SCGB1D4	-	secretoglobin, family 1D, member 4	protein-coding
chr11	65274620	65274789	TTS (NR_002819)	TTS (NR_002819)	-8104	NR_049839	100847035		NR_049839		MIR548AR	-	microRNA 548ar	miscRNA
chr11	46315336	46315505	intron (NM_052854, intron 1 of 11)	intron (NM_052854, intron 1 of 11)	16192	NM_052854	90993	Hs.405961	NM_052854	ENSG00000157613	CREB3L1	OASIS	cAMP responsive element binding protein 3-like 1	protein-coding
chr11	27956355	27956524	Intergenic	Intergenic	-121923	NR_030341	693195		NR_030341		MIR610	MIRN610|hsa-mir-610	microRNA 610	miscRNA
chr11	66246691	66246860	promoter-TSS (NM_001256670)	promoter-TSS (NM_001256670)	-709	NM_005700	10072	Hs.740670	NM_001256670	ENSG00000254986	DPP3	DPPIII	dipeptidyl-peptidase 3	protein-coding
chr11	86300834	86301003	intron (NM_001014811, intron 1 of 13)	intron (NM_001014811, intron 1 of 13)	82322	NM_001014811	10873	Hs.199743	NM_001014811	ENSG00000151376	ME3	NADP-ME	malic enzyme 3, NADP(+)-dependent, mitochondrial	protein-coding
chr11	36171339	36171508	intron (NM_174902, intron 4 of 5)	intron (NM_174902, intron 4 of 5)	139576	NM_001101653	29099	Hs.279836	NM_001101653	ENSG00000110442	COMMD9	-	COMM domain containing 9	protein-coding
chr11	65316501	65316670	intron (NM_021070, intron 11 of 26)	MIRb|SINE|MIR	9114	NM_001130144	4054	Hs.289019	NM_001130144	ENSG00000168056	LTBP3	LTBP-3|LTBP2|STHAG6|pp6425	latent transforming growth factor beta binding protein 3	protein-coding
chr11	35633744	35633913	Intergenic	MLT1L|LTR|ERVL-MaLR	-5907	NM_014344	24147	Hs.39384	NM_014344	ENSG00000179431	FJX1	-	four jointed box 1 (Drosophila)	protein-coding
chr11	45631078	45631247	Intergenic	(TGGA)n|Simple_repeat|Simple_repeat	56044	NM_003654	8534	Hs.104576	NM_003654	ENSG00000175264	CHST1	C6ST|GST-1|KS6ST|KSGal6ST|KSST	carbohydrate (keratan sulfate Gal-6) sulfotransferase 1	protein-coding
chr11	65254673	65254842	Intergenic	MIRc|SINE|MIR	-10476	NR_002819	378938	Hs.642877	NR_002819		MALAT1	HCN|LINC00047|MALAT-1|NCRNA00047|NEAT2|PRO2853	metastasis associated lung adenocarcinoma transcript 1 (non-protein coding)	miscRNA
chr11	15598677	15598846	Intergenic	Intergenic	462277	NM_001042536	387755	Hs.591997	NM_001031853	ENSG00000188487	INSC	-	inscuteable homolog (Drosophila)	protein-coding
chr11	101826817	101826986	intron (NM_020802, intron 4 of 10)	intron (NM_020802, intron 4 of 10)	-39648	NM_178127	253935	Hs.318370	NM_178127	ENSG00000187151	ANGPTL5	-	angiopoietin-like 5	protein-coding
chr11	59324924	59325093	Intergenic	tRNA-Phe-TTY|tRNA|tRNA	37623	NR_036120	100422880		NR_036120		MIR3162	-	microRNA 3162	miscRNA
chr11	57009366	57009535	Intergenic	Intergenic	-4523	NM_005161	187	Hs.438311	NM_005161		APLNR	AGTRL1|APJ|APJR|HG11	apelin receptor	protein-coding
chr11	128635669	128635838	intron (NM_001271010, intron 3 of 9)	intron (NM_001271010, intron 3 of 9)	-69835	NR_038908	100507392	Hs.657715	NR_038908		FLI1-AS1	-	FLI1 antisense RNA 1	miscRNA
chr11	59327802	59327971	Intergenic	Intergenic	34745	NR_036120	100422880		NR_036120		MIR3162	-	microRNA 3162	miscRNA
chr11	66738350	66738519	Intergenic	Intergenic	-4320	NM_001136485	254439	Hs.232604	NM_001136485	ENSG00000173237	C11orf86	-	chromosome 11 open reading frame 86	protein-coding
chr11	130717650	130717819	Intergenic	MER44C|DNA|TcMar-Tigger	68648	NM_014758	399979	Hs.444024	NM_014758	ENSG00000120451	SNX19	CHET8	sorting nexin 19	protein-coding
chr11	65203071	65203240	Intergenic	Intergenic	-8774	NR_030343	693197		NR_030343		MIR612	MIRN612|hsa-mir-612	microRNA 612	miscRNA
chr11	115047645	115047814	intron (NM_014333, intron 9 of 9)	MER124|DNA?|DNA?	327512	NM_014333	23705	Hs.370510	NM_001098517	ENSG00000182985	CADM1	BL2|IGSF4|IGSF4A|NECL2|Necl-2|RA175|ST17|SYNCAM|TSLC1|sTSLC-1|sgIGSF|synCAM1	cell adhesion molecule 1	protein-coding
chr11	66828621	66828790	intron (NM_014578, intron 1 of 4)	AluSx|SINE|Alu	4416	NM_014578	29984	Hs.15114	NM_014578	ENSG00000173156	RHOD	ARHD|RHOHP1|RHOM|Rho	ras homolog family member D	protein-coding
chr11	65267924	65268093	non-coding (NR_002819, exon 1 of 1)	non-coding (NR_002819, exon 1 of 1)	2775	NR_002819	378938	Hs.642877	NR_002819		MALAT1	HCN|LINC00047|MALAT-1|NCRNA00047|NEAT2|PRO2853	metastasis associated lung adenocarcinoma transcript 1 (non-protein coding)	miscRNA
chr11	9791319	9791488	intron (NR_036485, intron 1 of 2)	ERV3-16A3_I-int|LTR|ERVL	-10323	NR_033972	440028	Hs.677541	NR_033972		LOC440028	-	uncharacterized LOC440028	miscRNA
chr11	63572737	63572906	Intergenic	Intergenic	-8102	NM_138471	144097	Hs.502793	NM_138471	ENSG00000168005	C11orf84	-	chromosome 11 open reading frame 84	protein-coding
chr11	59327809	59327978	Intergenic	Intergenic	34738	NR_036120	100422880		NR_036120		MIR3162	-	microRNA 3162	miscRNA
chr11	92613440	92613609	intron (NM_001008781, intron 21 of 24)	intron (NM_001008781, intron 21 of 24)	-89265	NM_005959	4544	Hs.569039	NM_005959	ENSG00000134640	MTNR1B	FGQTL2|MEL-1B-R|MT2	melatonin receptor 1B	protein-coding
chr11	94600991	94601160	intron (NM_130847, intron 11 of 12)	MIRb|SINE|MIR	99567	NM_130847	154810	Hs.503594	NM_130847	ENSG00000166025	AMOTL1	JEAP	angiomotin like 1	protein-coding
chr11	9927644	9927813	intron (NM_030962, intron 16 of 39)	intron (NM_030962, intron 16 of 39)	-146648	NR_033972	440028	Hs.677541	NR_033972		LOC440028	-	uncharacterized LOC440028	miscRNA
chr11	67031740	67031909	Intergenic	Intergenic	-2081	NM_001619	156	Hs.83636	NM_001619	ENSG00000173020	ADRBK1	BARK1|BETA-ARK1|GRK2	adrenergic, beta, receptor kinase 1	protein-coding
chr11	62469878	62470047	non-coding (NR_037948, exon 4 of 12)	non-coding (NR_037948, exon 4 of 12)	3825	NM_001130702	26580	Hs.533709	NM_001122955	ENSG00000168000	BSCL2	GNG3LG|HMN5|SPG17	Berardinelli-Seip congenital lipodystrophy 2 (seipin)	protein-coding
chr11	47822437	47822606	intron (NM_015231, intron 23 of 35)	L2a|LINE|L2	-33528	NM_015308	23360	Hs.6834	NM_015308	ENSG00000109920	FNBP4	FBP30	formin binding protein 4	protein-coding
chr11	31880231	31880400	intron (NR_033971, intron 1 of 2)	LTR67B|LTR|ERVL	-40806	NM_001258462	5080	Hs.611376	NM_000280	ENSG00000007372	PAX6	AN|AN2|D11S812E|MGDA|WAGR	paired box 6	protein-coding
chr11	14358744	14358913	intron (NM_001177314, intron 1 of 5)	MER44D|DNA|TcMar-Tigger	21203	NM_001177315	22800	Hs.712835	NM_001102669	ENSG00000133818	RRAS2	TC21	related RAS viral (r-ras) oncogene homolog 2	protein-coding
chr11	29200889	29201058	Intergenic	MER45C|DNA|hAT-Tip100	837604	NM_002233	3739	Hs.592002	NM_002233	ENSG00000182255	KCNA4	HBK4|HK1|HPCN2|HUKII|KCNA4L|KCNA8|KV1.4|PCN2	potassium voltage-gated channel, shaker-related subfamily, member 4	protein-coding
chr11	73006324	73006493	intron (NM_004154, intron 1 of 1)	MIRb|SINE|MIR	-13255	NM_014786	9828	Hs.573929	NM_014786	ENSG00000110237	ARHGEF17	P164RHOGEF|TEM4|p164-RhoGEF	Rho guanine nucleotide exchange factor (GEF) 17	protein-coding
chr11	12197574	12197743	intron (NM_014632, intron 3 of 27)	intron (NM_014632, intron 3 of 27)	65520	NM_014632	9645	Hs.501928	NM_014632	ENSG00000133816	MICAL2	MICAL-2|MICAL2PV1|MICAL2PV2	microtubule associated monoxygenase, calponin and LIM domain containing 2	protein-coding
chr11	34126687	34126856	promoter-TSS (NM_001144030)	promoter-TSS (NM_001144030)	-340	NM_024662	55226	Hs.577281	NM_001144030	ENSG00000135372	NAT10	ALP|NET43	N-acetyltransferase 10 (GCN5-related)	protein-coding
chr11	46315292	46315461	intron (NM_052854, intron 1 of 11)	intron (NM_052854, intron 1 of 11)	16148	NM_052854	90993	Hs.405961	NM_052854	ENSG00000157613	CREB3L1	OASIS	cAMP responsive element binding protein 3-like 1	protein-coding
chr11	19503955	19504124	intron (NM_001111018, intron 1 of 37)	intron (NM_001111018, intron 1 of 37)	24737	NR_049725	100874012	Hs.434602	NR_049725		NAV2-AS5	-	NAV2 antisense RNA 5	miscRNA
chr11	65683557	65683726	TTS (NM_031450)	TTS (NM_031450)	2890	NM_031450	83638	Hs.433573	NM_001135635	ENSG00000175573	C11orf68	BLES03|P5326	chromosome 11 open reading frame 68	protein-coding
chr11	63233608	63233777	exon (NM_001146729, exon 5 of 6)	exon (NM_001146729, exon 5 of 6)	24988	NM_054108	117245	Hs.410316	NM_001146728	ENSG00000168004	HRASLS5	HRLP5|RLP1|iNAT	HRAS-like suppressor family, member 5	protein-coding
chr11	61518465	61518634	Intergenic	L2a|LINE|L2	-1572	NM_001127392	745	Hs.473109	NM_001127392	ENSG00000124920	C11orf9	MRF|Ndt80	chromosome 11 open reading frame 9	protein-coding
chr11	66250079	66250248	intron (NM_001256670, intron 2 of 16)	intron (NM_001256670, intron 2 of 16)	2679	NM_001256670	10072	Hs.740670	NM_001256670	ENSG00000254986	DPP3	DPPIII	dipeptidyl-peptidase 3	protein-coding
chr11	65963414	65963583	intron (NM_018026, intron 2 of 23)	Charlie1a|DNA|hAT-Charlie	-61267	NM_001134775	64837	Hs.280792	NM_001134774	ENSG00000174996	KLC2	-	kinesin light chain 2	protein-coding
chr11	63882022	63882191	intron (NM_013280, intron 1 of 1)	(TGGA)n|Simple_repeat|Simple_repeat	10744	NM_013280	23769	Hs.584876	NM_013280	ENSG00000126500	FLRT1	-	fibronectin leucine rich transmembrane protein 1	protein-coding
chr11	66828079	66828248	intron (NM_014578, intron 1 of 4)	MIR3|SINE|MIR	3874	NM_014578	29984	Hs.15114	NM_014578	ENSG00000173156	RHOD	ARHD|RHOHP1|RHOM|Rho	ras homolog family member D	protein-coding
chr11	65489625	65489794	Intergenic	MER90a|LTR|ERV1	-1300	NM_032193	84153	Hs.718438	NM_032193	ENSG00000172922	RNASEH2C	AGS3|AYP1	ribonuclease H2, subunit C	protein-coding
chr11	43852613	43852782	intron (NM_016142, intron 7 of 10)	intron (NM_016142, intron 7 of 10)	-49660	NM_139178	221120	Hs.720708	NM_139178	ENSG00000166199	ALKBH3	ABH3|DEPC-1|DEPC1|PCA1	alkB, alkylation repair homolog 3 (E. coli)	protein-coding
chr11	2455709	2455878	Intergenic	(TG)n|Simple_repeat|Simple_repeat	-10428	NM_000218	3784	Hs.95162	NM_000218	ENSG00000053918	KCNQ1	ATFB1|ATFB3|JLNS1|KCNA8|KCNA9|KVLQT1|Kv1.9|Kv7.1|LQT|LQT1|RWS|SQT2|WRS	potassium voltage-gated channel, KQT-like subfamily, member 1	protein-coding
chr11	65233182	65233351	Intergenic	Intergenic	21337	NR_030343	693197		NR_030343		MIR612	MIRN612|hsa-mir-612	microRNA 612	miscRNA
chr11	64212306	64212475	Intergenic	AluJo|SINE|Alu	-4139	NR_073177	100996455	Hs.634142	XM_003846433	ENSG00000181908	LOC100996455	-	uncharacterized LOC100996455	miscRNA
chr11	129509249	129509418	Intergenic	Intergenic	-176408	NM_138788	120224	Hs.504301	NM_138788	ENSG00000151715	TMEM45B	-	transmembrane protein 45B	protein-coding
chr11	65226723	65226892	Intergenic	MLT1F1|LTR|ERVL-MaLR	14878	NR_030343	693197		NR_030343		MIR612	MIRN612|hsa-mir-612	microRNA 612	miscRNA
chr11	33712083	33712252	Intergenic	LTR44|LTR|ERV1	10119	NM_001166692	100131378	Hs.709466	NM_001166692	ENSG00000205177	C11orf91	-	chromosome 11 open reading frame 91	protein-coding
chr11	65812297	65812466	intron (NM_033036, intron 2 of 2)	intron (NM_033036, intron 2 of 2)	4270	NM_033036	89792	Hs.208343	NM_033036	ENSG00000175229	GAL3ST3	GAL3ST-3|GAL3ST2	galactose-3-O-sulfotransferase 3	protein-coding
chr11	61739016	61739185	Intergenic	Intergenic	-3968	NM_002032	2495	Hs.645560	NM_002032	ENSG00000167996	FTH1	FHC|FTH|FTHL6|PIG15|PLIF	ferritin, heavy polypeptide 1	protein-coding
chr11	15266137	15266306	intron (NM_001031853, intron 12 of 12)	MIRb|SINE|MIR	129737	NM_001042536	387755	Hs.591997	NM_001031853	ENSG00000188487	INSC	-	inscuteable homolog (Drosophila)	protein-coding
chr11	61136179	61136348	non-coding (NR_028473, exon 6 of 6)	non-coding (NR_028473, exon 6 of 6)	-6508	NM_153611	220002	Hs.22546	NM_001161452	ENSG00000162144	CYBASC3	LCYTB	cytochrome b, ascorbate dependent 3	protein-coding
chr11	64147330	64147499	Intergenic	(TG)n|Simple_repeat|Simple_repeat	11340	NR_031602	100302280		NR_031602		MIR1237	MIRN1237|hsa-mir-1237	microRNA 1237	miscRNA
chr11	62609059	62609228	Intergenic	U2|snRNA|snRNA	-1515	NM_018093	54663	Hs.654620	NM_018093	ENSG00000133316	WDR74	-	WD repeat domain 74	protein-coding
chr11	66420415	66420584	intron (NM_001198844, intron 2 of 2)	intron (NM_001198844, intron 2 of 2)	14411	NM_002896	5936	Hs.728823	NM_001198843	ENSG00000173933	RBM4	LARK|RBM4A|ZCCHC21|ZCRB3A	RNA binding motif protein 4	protein-coding
chr11	17098266	17098435	intron (NM_001017, intron 3 of 5)	intron (NM_001017, intron 3 of 5)	870	NM_001017	6207	Hs.446588	NM_001017	ENSG00000110700	RPS13	S13	ribosomal protein S13	protein-coding
chr11	61342842	61343011	intron (NM_001252065, intron 1 of 9)	intron (NM_001252065, intron 1 of 9)	5418	NM_004200	9066	Hs.684589	NM_001252065	ENSG00000011347	SYT7	IPCA-7|IPCA7|PCANAP7|SYT-VII|SYTVII	synaptotagmin VII	protein-coding
chr11	36369136	36369305	intron (NM_001160167, intron 1 of 8)	intron (NM_001160167, intron 1 of 8)	-28315	NM_024841	79899	Hs.19987	NM_001160167	ENSG00000135362	PRR5L	PROTOR2	proline rich 5 like	protein-coding
chr11	63440831	63441000	Intergenic	Intergenic	-1832	NM_015459	25923	Hs.356719	NM_015459	ENSG00000184743	ATL3	-	atlastin GTPase 3	protein-coding
chr11	66066892	66067061	Intergenic	MLT1G3|LTR|ERVL-MaLR	7603	NM_153266	256472	Hs.399779	NM_153266	ENSG00000179292	TMEM151A	TMEM151	transmembrane protein 151A	protein-coding
chr11	66595687	66595856	exon (NM_024650, exon 14 of 17)	exon (NM_024650, exon 14 of 17)	-15112	NM_001032279	9986	Hs.654972	NM_001032279	ENSG00000173653	RCE1	FACE2|RCE1A|RCE1B	RCE1 homolog, prenyl protein protease (S. cerevisiae)	protein-coding
chr11	8652410	8652579	intron (NM_014818, intron 10 of 19)	intron (NM_014818, intron 10 of 19)	27889	NM_014818	9866	Hs.130836	NM_014818	ENSG00000166436	TRIM66	C11orf29|TIF1D|TIF1DELTA	tripartite motif containing 66	protein-coding
chr11	33919486	33919655	Intergenic	Intergenic	-5734	NM_005574	4005	Hs.34560	NM_001142315	ENSG00000135363	LMO2	RBTN2|RBTNL1|RHOM2|TTG2	LIM domain only 2 (rhombotin-like 1)	protein-coding
chr11	58443910	58444079	Intergenic	L2|LINE|L2	53848	NM_000614	1270	Hs.524920	NM_000614	ENSG00000242689	CNTF	HCNTF	ciliary neurotrophic factor	protein-coding
chr11	64130690	64130859	intron (NM_001006944, intron 8 of 16)	intron (NM_001006944, intron 8 of 16)	4149	NM_003942	8986	Hs.105584	NM_001006944	ENSG00000162302	RPS6KA4	MSK2|RSK-B	ribosomal protein S6 kinase, 90kDa, polypeptide 4	protein-coding
chr11	93863864	93864033	intron (NM_015368, intron 1 of 4)	intron (NM_015368, intron 1 of 4)	1854	NM_015368	24145	Hs.591976	NM_015368	ENSG00000110218	PANX1	MRS1|PX1|UNQ2529	pannexin 1	protein-coding
chr11	44320626	44320795	intron (NM_021926, intron 1 of 3)	intron (NM_021926, intron 1 of 3)	11006	NM_021926	60529	Hs.436055	NM_021926	ENSG00000052850	ALX4	FND2	ALX homeobox 4	protein-coding
chr11	93542755	93542924	intron (NM_004268, intron 10 of 11)	intron (NM_004268, intron 10 of 11)	25434	NM_004268	9440	Hs.444931	NM_004268	ENSG00000042429	MED17	CRSP6|CRSP77|DRIP80|TRAP80	mediator complex subunit 17	protein-coding
chr11	27648591	27648760	intron (NR_002832, intron 3 of 7)	intron (NR_002832, intron 3 of 7)	32521	NM_001143816	627	Hs.502182	NM_001143805	ENSG00000176697	BDNF	ANON2|BULN2	brain-derived neurotrophic factor	protein-coding
chr11	63390492	63390661	Intergenic	Intergenic	-8635	NM_001128203	11145	Hs.502775	NM_001128203	ENSG00000176485	PLA2G16	AdPLA|H-REV107-1|HRASLS3|HREV107|HREV107-1|HREV107-3|HRSL3	phospholipase A2, group XVI	protein-coding
chr11	7750139	7750308	Intergenic	Intergenic	-22282	NM_198185	341277	Hs.532475	NM_198185	ENSG00000183378	OVCH2	OVTN	ovochymase 2 (gene/pseudogene)	protein-coding
chr11	66235073	66235242	intron (NM_001243136, intron 1 of 5)	intron (NM_001243136, intron 1 of 5)	821	NM_001243136	246330	Hs.656875	NM_001098510	ENSG00000174516	PELI3	-	pellino E3 ubiquitin protein ligase family member 3	protein-coding
chr11	128334791	128334960	intron (NM_001162422, intron 2 of 3)	MIRc|SINE|MIR	57330	NM_005238	2113	Hs.369438	NM_001143820	ENSG00000134954	ETS1	ETS-1|EWSR2	v-ets erythroblastosis virus E26 oncogene homolog 1 (avian)	protein-coding
chr11	45705276	45705445	Intergenic	Intergenic	-18154	NM_003654	8534	Hs.104576	NM_003654	ENSG00000175264	CHST1	C6ST|GST-1|KS6ST|KSGal6ST|KSST	carbohydrate (keratan sulfate Gal-6) sulfotransferase 1	protein-coding
chr11	60491512	60491681	Intergenic	Intergenic	24549	NM_031457	83661	Hs.150878	NM_031457	ENSG00000166959	MS4A8B	4SPAN4|MS4A4	membrane-spanning 4-domains, subfamily A, member 8B	protein-coding
chr11	62446830	62446999	promoter-TSS (NM_015853)	promoter-TSS (NM_015853)	-387	NM_015853	51035	Hs.351296	NM_015853	ENSG00000162191	UBXN1	2B28|SAKS1|UBXD10	UBX domain protein 1	protein-coding
chr11	65578579	65578748	Intergenic	Intergenic	-22747	NM_152760	254122	Hs.591950	NM_152760	ENSG00000172803	SNX32	SNX6B	sorting nexin 32	protein-coding
chr11	93018600	93018769	Intergenic	Intergenic	-45199	NM_181645	159989	Hs.436625	NM_181645	ENSG00000165325	CCDC67	-	coiled-coil domain containing 67	protein-coding
chr11	66652064	66652233	intron (NM_000920, intron 2 of 21)	MLT1A0|LTR|ERVL-MaLR	23192	NM_022172	5091	Hs.89890	NM_000920	ENSG00000173599	PC	PCB	pyruvate carboxylase	protein-coding
chr11	94521168	94521337	intron (NM_130847, intron 1 of 12)	intron (NM_130847, intron 1 of 12)	19744	NM_130847	154810	Hs.503594	NM_130847	ENSG00000166025	AMOTL1	JEAP	angiomotin like 1	protein-coding
chr11	65075465	65075634	Intergenic	L2c|LINE|L2	-6740	NM_006779	10435	Hs.741371	NM_006779	ENSG00000149798	CDC42EP2	BORG1|CEP2	CDC42 effector protein (Rho GTPase binding) 2	protein-coding
chr11	65246723	65246892	Intergenic	Intergenic	-18426	NR_002819	378938	Hs.642877	NR_002819		MALAT1	HCN|LINC00047|MALAT-1|NCRNA00047|NEAT2|PRO2853	metastasis associated lung adenocarcinoma transcript 1 (non-protein coding)	miscRNA
chr11	2455101	2455270	Intergenic	(TG)n|Simple_repeat|Simple_repeat	-10910	NM_014555	29850	Hs.272287	NM_014555	ENSG00000070985	TRPM5	LTRPC5|MTR1	transient receptor potential cation channel, subfamily M, member 5	protein-coding
chr11	118802443	118802612	Intergenic	L2b|LINE|L2	-20914	NM_182557	283149	Hs.414740	NM_182557	ENSG00000186174	BCL9L	BCL9-2|DLNB11	B-cell CLL/lymphoma 9-like	protein-coding
chr11	94542476	94542645	intron (NM_130847, intron 3 of 12)	intron (NM_130847, intron 3 of 12)	41052	NM_130847	154810	Hs.503594	NM_130847	ENSG00000166025	AMOTL1	JEAP	angiomotin like 1	protein-coding
chr11	63213160	63213329	intron (NR_049833, intron 2 of 3)	MLT1F1|LTR|ERVL-MaLR	45436	NM_054108	117245	Hs.410316	NM_001146728	ENSG00000168004	HRASLS5	HRLP5|RLP1|iNAT	HRAS-like suppressor family, member 5	protein-coding
chr11	61499069	61499238	intron (NM_006133, intron 9 of 19)	MIRb|SINE|MIR	-20968	NM_001127392	745	Hs.473109	NM_001127392	ENSG00000124920	C11orf9	MRF|Ndt80	chromosome 11 open reading frame 9	protein-coding
chr11	59424498	59424667	intron (NM_152716, intron 5 of 18)	intron (NM_152716, intron 5 of 18)	11929	NM_152716	219988	Hs.591960	NM_152716	ENSG00000166889	PATL1	Pat1b|hPat1b	protein associated with topoisomerase II homolog 1 (yeast)	protein-coding
chr11	12229033	12229202	intron (NM_014632, intron 4 of 27)	intron (NM_014632, intron 4 of 27)	-79330	NM_032867	84953	Hs.128196	NM_032867	ENSG00000133808	MICALCL	Ebitein1	MICAL C-terminal like	protein-coding
chr11	84411836	84412005	intron (NM_001142699, intron 6 of 27)	intron (NM_001142699, intron 6 of 27)	222545	NM_001364	1740	Hs.367656	NM_001142699	ENSG00000150672	DLG2	PPP1R58|PSD-93|PSD93|chapsyn-110	discs, large homolog 2 (Drosophila)	protein-coding
chr11	104761909	104762078	exon (NM_001191016, exon 4 of 8)	exon (NM_001191016, exon 4 of 8)	7404	NR_034070	100506742	Hs.476989	NM_001191016	ENSG00000204403	CASP12	CASP-12|CASP12P1	caspase 12 (gene/pseudogene)	protein-coding
chr11	66253193	66253362	intron (NM_130443, intron 3 of 17)	AluJb|SINE|Alu	5793	NM_001256670	10072	Hs.740670	NM_001256670	ENSG00000254986	DPP3	DPPIII	dipeptidyl-peptidase 3	protein-coding
chr11	64449505	64449674	intron (NM_015080, intron 6 of 22)	intron (NM_015080, intron 6 of 22)	-38802	NM_138734	9379	Hs.372938	NM_015080	ENSG00000110076	NRXN2	-	neurexin 2	protein-coding
chr11	9921853	9922022	intron (NM_030962, intron 16 of 39)	LTR10F|LTR|ERV1	-140857	NR_033972	440028	Hs.677541	NR_033972		LOC440028	-	uncharacterized LOC440028	miscRNA
chr11	86415196	86415365	Intergenic	Intergenic	-31602	NM_001161586	10873	Hs.199743	NM_001014811	ENSG00000151376	ME3	NADP-ME	malic enzyme 3, NADP(+)-dependent, mitochondrial	protein-coding
chr11	45788394	45788563	Intergenic	MER21B|LTR|ERVL	-4505	NR_027134	374387	Hs.632142	NR_027134		DKFZp779M0652	-	uncharacterized DKFZp779M0652	miscRNA
chr11	102722160	102722329	Intergenic	Intergenic	-7902	NM_002422	4314	Hs.375129	NM_002422	ENSG00000149968	MMP3	CHDS6|MMP-3|SL-1|STMY|STMY1|STR1	matrix metallopeptidase 3 (stromelysin 1, progelatinase)	protein-coding
chr11	6146043	6146212	Intergenic	Intergenic	17118	NM_001005181	196335	Hs.632154	NM_001005181	ENSG00000180919	OR56B4	OR11-67	olfactory receptor, family 56, subfamily B, member 4	protein-coding
chr11	66116845	66117014	Intergenic	Intergenic	-1768	NM_006876	11041	Hs.8526	NM_006876	ENSG00000174684	B3GNT1	B3GN-T1|B3GNT6|BETA3GNTI|iGAT|iGNT	UDP-GlcNAc:betaGal beta-1,3-N-acetylglucosaminyltransferase 1	protein-coding
chr11	63867021	63867190	intron (NM_014067, intron 3 of 10)	(TGGA)n|Simple_repeat|Simple_repeat	-4257	NM_013280	23769	Hs.584876	NM_013280	ENSG00000126500	FLRT1	-	fibronectin leucine rich transmembrane protein 1	protein-coding
chr11	22179196	22179365	Intergenic	Intergenic	-35442	NM_213599	203859	Hs.154329	NM_001142649	ENSG00000171714	ANO5	GDD1|LGMD2L|TMEM16E	anoctamin 5	protein-coding
chr11	102175654	102175823	Intergenic	Intergenic	-12443	NM_182962	330	Hs.127799	NM_001165	ENSG00000023445	BIRC3	AIP1|API2|CIAP2|HAIP1|HIAP1|MALT2|MIHC|RNF49|c-IAP2	baculoviral IAP repeat containing 3	protein-coding
chr11	88256753	88256922	intron (NR_049724, intron 5 of 5)	intron (NR_049724, intron 5 of 5)	19093	NR_049724	100873989	Hs.616625	NR_049724		GRM5-AS1	-	GRM5 antisense RNA 1	miscRNA
chr11	70705739	70705908	intron (NM_012309, intron 8 of 22)	intron (NM_012309, intron 8 of 22)	12650	NR_037437	100500844		NR_037437		MIR3664	-	microRNA 3664	miscRNA
chr11	28959566	28959735	Intergenic	MLT1H1|LTR|ERVL-MaLR	829852	NM_001113528	196074	Hs.243326	NM_001113528	ENSG00000169519	METTL15	METT5D1	methyltransferase like 15	protein-coding
chr11	61127842	61128011	intron (NM_153611, intron 1 of 6)	MER58B|DNA|hAT-Charlie	-1547	NM_016464	51524	Hs.406530	NM_016464	ENSG00000149483	TMEM138	-	transmembrane protein 138	protein-coding
chr11	62670016	62670185	Intergenic	MLT1C|LTR|ERVL-MaLR	18912	NM_000738	1128	Hs.632119	NM_000738	ENSG00000168539	CHRM1	HM1|M1|M1R	cholinergic receptor, muscarinic 1	protein-coding
chr11	57043127	57043296	Intergenic	Intergenic	-38284	NM_005161	187	Hs.438311	NM_005161		APLNR	AGTRL1|APJ|APJR|HG11	apelin receptor	protein-coding
chr11	69297153	69297322	Intergenic	(TGGA)n|Simple_repeat|Simple_repeat	-158636	NM_053056	595	Hs.523852	NM_053056	ENSG00000110092	CCND1	BCL1|D11S287E|PRAD1|U21B31	cyclin D1	protein-coding
chr11	65657222	65657391	promoter-TSS (NM_006848)	promoter-TSS (NM_006848)	-569	NM_006848	11007	Hs.66713	NM_006848	ENSG00000175602	CCDC85B	DIPA	coiled-coil domain containing 85B	protein-coding
chr11	62549299	62549468	exon (NM_006473, exon 7 of 11)	exon (NM_006473, exon 7 of 11)	-5491	NM_199337	374395	Hs.381134	NM_199337	ENSG00000185475	TMEM179B	-	transmembrane protein 179B	protein-coding
chr11	66934033	66934202	intron (NM_012308, intron 2 of 20)	7SLRNA|srpRNA|srpRNA	47377	NR_027473	22992	Hs.124147	NM_001256405	ENSG00000173120	KDM2A	CXXC8|FBL11|FBL7|FBXL11|JHDM1A|LILINA	lysine (K)-specific demethylase 2A	protein-coding
chr11	23924750	23924919	Intergenic	Intergenic	-593682	NM_001009909	338645	Hs.655032	NM_001009909	ENSG00000187398	LUZP2	KFSP2566|PRO6246	leucine zipper protein 2	protein-coding
chr11	96057245	96057414	intron (NM_032427, intron 1 of 4)	MIR|SINE|MIR	-17273	NR_036125	100422991		NR_036125		MIR1260B	-	microRNA 1260b	miscRNA
chr11	72964887	72965056	Intergenic	Intergenic	-10599	NM_176796	5031	Hs.16362	NM_004154	ENSG00000171631	P2RY6	P2Y6	pyrimidinergic receptor P2Y, G-protein coupled, 6	protein-coding
chr11	66153736	66153905	Intergenic	Intergenic	-14529	NM_001532	3177	Hs.569017	NM_001532	ENSG00000174669	SLC29A2	DER12|ENT2|HNP36	solute carrier family 29 (nucleoside transporters), member 2	protein-coding
chr11	113803646	113803815	exon (NM_006028, exon 6 of 9)	exon (NM_006028, exon 6 of 9)	28212	NM_006028	9177	Hs.241377	NM_006028	ENSG00000149305	HTR3B	5-HT3B	5-hydroxytryptamine (serotonin) receptor 3B, ionotropic	protein-coding
chr11	116929571	116929740	intron (NM_025164, intron 1 of 23)	intron (NM_025164, intron 1 of 23)	39338	NM_025164	23387	Hs.167451	NM_025164	ENSG00000160584	SIK3	QSK|SIK-3	SIK family kinase 3	protein-coding
chr11	105023381	105023550	Intergenic	L1MD3|LINE|L1	-13004	NM_021571	59082	Hs.56279	NM_021571	ENSG00000255501	CARD18	ICEBERG|UNQ5804|pseudo-ICE	caspase recruitment domain family, member 18	protein-coding
chr11	65428894	65429063	intron (NM_001243985, intron 4 of 11)	L2c|LINE|L2	1465	NM_021975	5970	Hs.502875	NM_001145138	ENSG00000173039	RELA	NFKB3|p65	v-rel reticuloendotheliosis viral oncogene homolog A (avian)	protein-coding
chr11	66486918	66487087	intron (NM_006946, intron 2 of 36)	L2b|LINE|L2	1868	NM_006946	6712	Hs.26915	NM_006946	ENSG00000173898	SPTBN2	GTRAP41|SCA5	spectrin, beta, non-erythrocytic 2	protein-coding
chr11	62334432	62334601	intron (NM_001404, intron 6 of 9)	intron (NM_001404, intron 6 of 9)	-6738	NR_037427	100500804		NR_037427		MIR3654	-	microRNA 3654	miscRNA
chr11	62274361	62274530	intron (NM_024060, intron 4 of 5)	intron (NM_024060, intron 4 of 5)	39887	NM_024060	79026	Hs.502756	NM_001620	ENSG00000124942	AHNAK	AHNAKRS	AHNAK nucleoprotein	protein-coding
chr11	62803165	62803334	Intergenic	Intergenic	-19932	NM_001184736	9376	Hs.266223	NM_001184732	ENSG00000149452	SLC22A8	OAT3	solute carrier family 22 (organic anion transporter), member 8	protein-coding
chr11	55451159	55451328	Intergenic	Intergenic	18600	NM_001004704	219432	Hs.511921	NM_001004704	ENSG00000181903	OR4C6	OR11-138	olfactory receptor, family 4, subfamily C, member 6	protein-coding
chr11	106269907	106270076	Intergenic	Intergenic	-321526	NM_198439	143879	Hs.101949	NM_152433	ENSG00000182359	KBTBD3	BKLHD3	kelch repeat and BTB (POZ) domain containing 3	protein-coding
chr11	36042833	36043002	intron (NM_174902, intron 1 of 5)	intron (NM_174902, intron 1 of 5)	11269	NR_039769	100616311		NR_039769		MIR3973	-	microRNA 3973	miscRNA
chr11	12987761	12987930	Intergenic	Intergenic	23250	NR_038904	100506305	Hs.153408	NR_038904		LOC100506305	-	uncharacterized LOC100506305	miscRNA
chr11	37995592	37995761	Intergenic	MLT1G3|LTR|ERVL-MaLR	-1375847	NM_001243786	5897	Hs.714519	NM_000536	ENSG00000175097	RAG2	RAG-2	recombination activating gene 2	protein-coding
chr11	75770509	75770678	intron (NM_003369, intron 12 of 14)	MER20|DNA|hAT-Charlie	146981	NM_004626	7481	Hs.108219	NM_004626	ENSG00000085741	WNT11	HWNT11	wingless-type MMTV integration site family, member 11	protein-coding
chr11	65254248	65254417	Intergenic	MIRb|SINE|MIR	-10901	NR_002819	378938	Hs.642877	NR_002819		MALAT1	HCN|LINC00047|MALAT-1|NCRNA00047|NEAT2|PRO2853	metastasis associated lung adenocarcinoma transcript 1 (non-protein coding)	miscRNA
chr11	9153022	9153191	Intergenic	ERV3-16A3_I-int|LTR|ERVL	37196	NR_027713	283102	Hs.689472	NR_027713		KRT8P41	-	keratin 8 pseudogene 41	pseudo
chr11	63721349	63721518	intron (NM_024771, intron 6 of 7)	intron (NM_024771, intron 6 of 7)	14991	NM_024771	79829	Hs.523753	NM_024771	ENSG00000110583	NAA40	NAT11|PATT1	N(alpha)-acetyltransferase 40, NatD catalytic subunit, homolog (S. cerevisiae)	protein-coding
chr11	35053528	35053697	Intergenic	Intergenic	90228	NR_039836	100616437		NR_039836		MIR1343	-	microRNA 1343	miscRNA
chr11	62009073	62009242	promoter-TSS (NM_006551)	promoter-TSS (NM_006551)	-567	NM_006551	10647	Hs.204096	NM_006551	ENSG00000124935	SCGB1D2	LIPB|LPHB	secretoglobin, family 1D, member 2	protein-coding
chr11	33654932	33655101	intron (NM_012194, intron 15 of 19)	intron (NM_012194, intron 15 of 19)	67270	NM_001166692	100131378	Hs.709466	NM_001166692	ENSG00000205177	C11orf91	-	chromosome 11 open reading frame 91	protein-coding
chr11	73972849	73973018	Intergenic	MIR3|SINE|MIR	49766	NM_182904	283208	Hs.660541	NM_182904	ENSG00000149380	P4HA3	-	prolyl 4-hydroxylase, alpha polypeptide III	protein-coding
chr11	65822110	65822279	intron (NM_006842, intron 3 of 21)	intron (NM_006842, intron 3 of 21)	2378	NM_006842	10992	Hs.406423	NM_006842	ENSG00000087365	SF3B2	Cus1|SAP145|SF3B145|SF3b1|SF3b150	splicing factor 3b, subunit 2, 145kDa	protein-coding
chr11	19908110	19908279	intron (NM_001244963, intron 6 of 39)	intron (NM_001244963, intron 6 of 39)	-126565	NR_039843	100616426		NR_039843		MIR4694	-	microRNA 4694	miscRNA
chr11	65828905	65829074	intron (NM_006842, intron 14 of 21)	intron (NM_006842, intron 14 of 21)	-8835	NM_018026	55690	Hs.644326	NM_018026	ENSG00000175115	PACS1	-	phosphofurin acidic cluster sorting protein 1	protein-coding
chr11	44052577	44052746	Intergenic	MIRb|SINE|MIR	-16870	NM_001031854	390110	Hs.558851	NM_001031854	ENSG00000205126	ACCSL	-	1-aminocyclopropane-1-carboxylate synthase homolog (Arabidopsis)(non-functional)-like	protein-coding
chr11	85430180	85430349	promoter-TSS (NM_206929)	promoter-TSS (NM_206929)	-68	NM_206929	54843	Hs.369520	NM_001162951	ENSG00000137501	SYTL2	CHR11SYT|EXO4|SGA72M|SLP2|SLP2A	synaptotagmin-like 2	protein-coding
chr11	96062430	96062599	intron (NM_032427, intron 1 of 4)	intron (NM_032427, intron 1 of 4)	-12088	NR_036125	100422991		NR_036125		MIR1260B	-	microRNA 1260b	miscRNA
chr11	61552825	61552994	intron (NM_001127392, intron 25 of 26)	MIR|SINE|MIR	7124	NR_030342	693196		NR_030342		MIR611	MIRN611|hsa-mir-611	microRNA 611	miscRNA
chr11	66609673	66609842	intron (NR_048553, intron 13 of 14)	intron (NR_048553, intron 13 of 14)	-1126	NM_001032279	9986	Hs.654972	NM_001032279	ENSG00000173653	RCE1	FACE2|RCE1A|RCE1B	RCE1 homolog, prenyl protein protease (S. cerevisiae)	protein-coding
chr11	118250257	118250426	exon (NM_001204077, exon 11 of 20)	exon (NM_001204077, exon 11 of 20)	20045	NM_004788	9354	Hs.602967	NM_001204077	ENSG00000110344	UBE4A	E4|UBOX2|UFD2	ubiquitination factor E4A	protein-coding
chr11	36147139	36147308	intron (NM_174902, intron 4 of 5)	intron (NM_174902, intron 4 of 5)	115575	NR_039769	100616311		NR_039769		MIR3973	-	microRNA 3973	miscRNA
chr11	59367231	59367400	intron (NM_002556, intron 7 of 13)	intron (NM_002556, intron 7 of 13)	-4684	NR_036120	100422880		NR_036120		MIR3162	-	microRNA 3162	miscRNA
chr11	36562662	36562831	Intergenic	Intergenic	-26817	NM_000448	5896	Hs.677010	NM_000448	ENSG00000166349	RAG1	RAG-1|RNF74	recombination activating gene 1	protein-coding
chr11	116323083	116323252	Intergenic	L2b|LINE|L2	320547	NM_032725	84811	Hs.437341	NM_001159736	ENSG00000137656	BUD13	Cwc26|fSAP71	BUD13 homolog (S. cerevisiae)	protein-coding
chr11	35631679	35631848	Intergenic	Intergenic	-7972	NM_014344	24147	Hs.39384	NM_014344	ENSG00000179431	FJX1	-	four jointed box 1 (Drosophila)	protein-coding
chr11	122616017	122616186	intron (NM_032873, intron 1 of 13)	L2c|LINE|L2	89703	NM_032873	84959	Hs.444075	NM_032873	ENSG00000154127	UBASH3B	STS-1|STS1|TULA-2|p70	ubiquitin associated and SH3 domain containing B	protein-coding
chr11	65575802	65575971	Intergenic	Intergenic	21381	NM_004561	5017	Hs.134434	NM_004561	ENSG00000172818	OVOL1	HOVO1	ovo-like 1(Drosophila)	protein-coding
chr11	119014349	119014518	Intergenic	MER21B|LTR|ERVL	-5317	NM_022169	64137	Hs.126378	NM_001142505	ENSG00000172350	ABCG4	WHITE2	ATP-binding cassette, sub-family G (WHITE), member 4	protein-coding
chr11	91980284	91980453	Intergenic	L2c|LINE|L2	-104894	NM_001008781	120114	Hs.98523	NM_001008781	ENSG00000165323	FAT3	CDHF15|CDHR10	FAT tumor suppressor homolog 3 (Drosophila)	protein-coding
chr11	92788134	92788303	Intergenic	Intergenic	85429	NM_005959	4544	Hs.569039	NM_005959	ENSG00000134640	MTNR1B	FGQTL2|MEL-1B-R|MT2	melatonin receptor 1B	protein-coding
chr11	65705831	65706000	Intergenic	L1MC4a|LINE|L1	-7200	NM_152762	254187	Hs.350671	NM_152762		TSGA10IP	FAM161C	testis specific, 10 interacting protein	protein-coding
chr11	65834202	65834371	intron (NM_006842, intron 19 of 21)	L1MEc|LINE|L1	-3538	NM_018026	55690	Hs.644326	NM_018026	ENSG00000175115	PACS1	-	phosphofurin acidic cluster sorting protein 1	protein-coding
chr11	64153871	64154040	Intergenic	Intergenic	17881	NR_031602	100302280		NR_031602		MIR1237	MIRN1237|hsa-mir-1237	microRNA 1237	miscRNA
chr11	117480974	117481143	intron (NM_020693, intron 3 of 32)	intron (NM_020693, intron 3 of 32)	186918	NM_020693	57453	Hs.659513	NM_020693	ENSG00000177103	DSCAML1	-	Down syndrome cell adhesion molecule like 1	protein-coding
chr11	82175006	82175175	Intergenic	L2|LINE|L2	269816	NM_175885	220382	Hs.448218	NM_175885	ENSG00000182103	FAM181B	-	family with sequence similarity 181, member B	protein-coding
chr11	34621011	34621180	Intergenic	Intergenic	-21493	NM_012153	26298	Hs.653859	NM_001206615	ENSG00000135373	EHF	ESE3|ESE3B|ESEJ	ets homologous factor	protein-coding
chr11	64957941	64958110	intron (NM_001198869, intron 10 of 21)	L1M5|LINE|L1	8721	NM_005186	823	Hs.735492	NM_001198868	ENSG00000014216	CAPN1	CANP|CANP1|CANPL1|muCANP|muCL	calpain 1, (mu/I) large subunit	protein-coding
chr11	65856523	65856692	intron (NM_018026, intron 1 of 23)	MER20B|DNA|hAT-Charlie	18783	NM_018026	55690	Hs.644326	NM_018026	ENSG00000175115	PACS1	-	phosphofurin acidic cluster sorting protein 1	protein-coding
chr11	15649236	15649405	Intergenic	L2a|LINE|L2	512836	NM_001042536	387755	Hs.591997	NM_001031853	ENSG00000188487	INSC	-	inscuteable homolog (Drosophila)	protein-coding
chr11	15998635	15998804	intron (NM_033326, intron 15 of 15)	L2|LINE|L2	425694	NM_001145819	55553	Hs.368226	NM_001145811	ENSG00000110693	SOX6	HSSOX6|SOXD	SRY (sex determining region Y)-box 6	protein-coding
chr11	65242524	65242693	Intergenic	Intergenic	-22625	NR_002819	378938	Hs.642877	NR_002819		MALAT1	HCN|LINC00047|MALAT-1|NCRNA00047|NEAT2|PRO2853	metastasis associated lung adenocarcinoma transcript 1 (non-protein coding)	miscRNA
chr11	64150889	64151058	Intergenic	L2b|LINE|L2	14899	NR_031602	100302280		NR_031602		MIR1237	MIRN1237|hsa-mir-1237	microRNA 1237	miscRNA
chr11	66417538	66417707	intron (NM_001198844, intron 2 of 2)	intron (NM_001198844, intron 2 of 2)	11534	NM_002896	5936	Hs.728823	NM_001198843	ENSG00000173933	RBM4	LARK|RBM4A|ZCCHC21|ZCRB3A	RNA binding motif protein 4	protein-coding
chr11	86162545	86162714	intron (NM_001014811, intron 7 of 13)	ERVL-E-int|LTR|ERVL	76851	NM_021827	60494	Hs.144913	NM_001156474	ENSG00000149201	CCDC81	-	coiled-coil domain containing 81	protein-coding
chr11	86430934	86431103	Intergenic	Intergenic	-47340	NM_001161586	10873	Hs.199743	NM_001014811	ENSG00000151376	ME3	NADP-ME	malic enzyme 3, NADP(+)-dependent, mitochondrial	protein-coding
chr11	65464693	65464862	Intergenic	Intergenic	-14696	NM_006388	10524	Hs.397010	NM_001206833	ENSG00000172977	KAT5	ESA1|HTATIP|HTATIP1|PLIP|TIP|TIP60|cPLA2	K(lysine) acetyltransferase 5	protein-coding
chr11	61780145	61780314	Intergenic	Intergenic	-45097	NM_002032	2495	Hs.645560	NM_002032	ENSG00000167996	FTH1	FHC|FTH|FTHL6|PIG15|PLIF	ferritin, heavy polypeptide 1	protein-coding
chr11	65505250	65505419	Intergenic	MER66-int|LTR|ERV1	-16925	NM_032193	84153	Hs.718438	NM_032193	ENSG00000172922	RNASEH2C	AGS3|AYP1	ribonuclease H2, subunit C	protein-coding
chr11	66390541	66390710	intron (NM_001198846, intron 1 of 1)	intron (NM_001198846, intron 1 of 1)	6572	NM_006328	10432	Hs.533712	NM_001198836	ENSG00000239306	RBM14	COAA|PSP2|SIP|SYTIP1|TMEM137	RNA binding motif protein 14	protein-coding
chr11	8330766	8330935	Intergenic	Intergenic	-40668	NM_001270428	4004	Hs.654426	NM_001270428	ENSG00000166407	LMO1	RBTN1|RHOM1|TTG1	LIM domain only 1 (rhombotin 1)	protein-coding
chr11	22647471	22647640	promoter-TSS (NM_022725)	promoter-TSS (NM_022725)	-168	NM_022725	2188	Hs.632151	NM_022725	ENSG00000183161	FANCF	FAF	Fanconi anemia, complementation group F	protein-coding
chr11	116433259	116433428	Intergenic	Intergenic	210371	NM_032725	84811	Hs.437341	NM_001159736	ENSG00000137656	BUD13	Cwc26|fSAP71	BUD13 homolog (S. cerevisiae)	protein-coding
chr11	34377225	34377394	intron (NM_145804, intron 1 of 16)	intron (NM_145804, intron 1 of 16)	2246	NM_145804	25841	Hs.23361	NM_145804	ENSG00000166016	ABTB2	-	ankyrin repeat and BTB (POZ) domain containing 2	protein-coding
chr11	62562395	62562564	exon (NM_006362, exon 18 of 21)	exon (NM_006362, exon 18 of 21)	-2993	NM_001080501	79064	Hs.530463	NM_001080501	ENSG00000168569	TMEM223	-	transmembrane protein 223	protein-coding
chr11	65675767	65675936	Intergenic	Intergenic	-7854	NM_005438	8061	Hs.283565	NM_005438	ENSG00000175592	FOSL1	FRA|FRA1|fra-1	FOS-like antigen 1	protein-coding
chr11	64699874	64700043	intron (NM_006244, intron 11 of 13)	MIRc|SINE|MIR	3402	NM_130769	170589	Hs.436119	NM_130769	ENSG00000149735	GPHA2	A2|GPA2|ZSIG51	glycoprotein hormone alpha 2	protein-coding
chr11	115856703	115856872	Intergenic	MLT1I|LTR|ERVL-MaLR	-225869	NR_034148	283143	Hs.130499	NR_034148		LOC283143	-	uncharacterized LOC283143	miscRNA
chr11	114117671	114117840	intron (NM_001018011, intron 5 of 6)	intron (NM_001018011, intron 5 of 6)	-48780	NM_006169	4837	Hs.503911	NM_006169	ENSG00000166741	NNMT	-	nicotinamide N-methyltransferase	protein-coding
chr11	65791240	65791409	intron (NM_053054, intron 1 of 11)	intron (NM_053054, intron 1 of 11)	2664	NM_053054	117144	Hs.189105	NM_053054	ENSG00000175294	CATSPER1	CATSPER|SPGF7	cation channel, sperm associated 1	protein-coding
chr11	44377294	44377463	Intergenic	MLT1B|LTR|ERVL-MaLR	-45662	NM_021926	60529	Hs.436055	NM_021926	ENSG00000052850	ALX4	FND2	ALX homeobox 4	protein-coding
chr11	60623608	60623777	promoter-TSS (NM_004778)	promoter-TSS (NM_004778)	-248	NM_004778	11251	Hs.299567	NM_004778	ENSG00000183134	PTGDR2	CD294|CRTH2|DL1R|DP2|GPR44	prostaglandin D2 receptor 2	protein-coding
chr11	64857158	64857327	promoter-TSS (NM_001242631)	promoter-TSS (NM_001242631)	-700	NM_001242631	100130348	Hs.712317	NM_001242631	ENSG00000187066	LOC100130348	-	uncharacterized LOC100130348	protein-coding
chr11	86736638	86736807	Intergenic	Intergenic	-12164	NM_022918	65084	Hs.730749	NM_001168724	ENSG00000166575	TMEM135	PMP52	transmembrane protein 135	protein-coding
chr11	59319190	59319359	Intergenic	tRNA-Leu-TTA|tRNA|tRNA	36888	NM_001004711	390199	Hs.553757	NM_001004711	ENSG00000172742	OR4D9	OR11-253	olfactory receptor, family 4, subfamily D, member 9	protein-coding
chr11	66464154	66464323	intron (NM_006946, intron 19 of 36)	L2c|LINE|L2	-18963	NM_031492	83759	Hs.618713	NM_031492	ENSG00000173914	RBM4B	RBM30|RBM4L|ZCCHC15|ZCRB3B	RNA binding motif protein 4B	protein-coding
chr11	62757818	62757987	Intergenic	LTR16C|LTR|ERVL	-5407	NM_004790	9356	Hs.369252	NM_004790	ENSG00000197901	SLC22A6	HOAT1|OAT1|PAHT|ROAT1	solute carrier family 22 (organic anion transporter), member 6	protein-coding
chr11	64439768	64439937	intron (NM_138732, intron 6 of 19)	intron (NM_138732, intron 6 of 19)	-29065	NM_138734	9379	Hs.372938	NM_015080	ENSG00000110076	NRXN2	-	neurexin 2	protein-coding
chr11	18958632	18958801	Intergenic	MLT1J2|LTR|ERVL-MaLR	-2167	NM_147199	259249	Hs.711459	NM_147199	ENSG00000170255	MRGPRX1	GPCR|MRGX1|SNSR4	MAS-related GPR, member X1	protein-coding
chr11	48017992	48018161	intron (NM_001098503, intron 1 of 8)	MIRb|SINE|MIR	15966	NM_002843	5795	Hs.318547	NM_001098503	ENSG00000149177	PTPRJ	CD148|DEP1|HPTPeta|R-PTP-ETA|SCC1	protein tyrosine phosphatase, receptor type, J	protein-coding
chr11	65977811	65977980	exon (NM_018026, exon 3 of 24)	exon (NM_018026, exon 3 of 24)	-46870	NM_001134775	64837	Hs.280792	NM_001134774	ENSG00000174996	KLC2	-	kinesin light chain 2	protein-coding
chr11	61165651	61165820	exon (NM_016499, exon 5 of 5)	exon (NM_016499, exon 5 of 5)	5870	NM_016499	51259	Hs.26745	NM_001173990	ENSG00000187049	TMEM216	-	transmembrane protein 216	protein-coding
chr11	65951336	65951505	intron (NM_018026, intron 1 of 23)	MER66A|LTR|ERV1	-73345	NM_001134775	64837	Hs.280792	NM_001134774	ENSG00000174996	KLC2	-	kinesin light chain 2	protein-coding
chr11	59318078	59318247	Intergenic	tRNA-Val-GTA|tRNA|tRNA	35776	NM_001004711	390199	Hs.553757	NM_001004711	ENSG00000172742	OR4D9	OR11-253	olfactory receptor, family 4, subfamily D, member 9	protein-coding
chr11	18548622	18548791	promoter-TSS (NM_006292)	promoter-TSS (NM_006292)	-203	NM_006292	7251	Hs.523512	NM_006292	ENSG00000074319	TSG101	TSG10|VPS23	tumor susceptibility gene 101	protein-coding
chr11	88136087	88136256	Intergenic	L2c|LINE|L2	-65230	NM_001814	1075	Hs.128065	NM_001114173	ENSG00000109861	CTSC	CPPI|DPP-I|DPP1|DPPI|HMS|JP|JPD|PALS|PLS	cathepsin C	protein-coding
chr11	19704168	19704337	intron (NM_001111018, intron 1 of 37)	MSTB|LTR|ERVL-MaLR	-30629	NM_145117	89797	Hs.639428	NM_001111018	ENSG00000166833	NAV2	HELAD1|POMFIL2|RAINB1|STEERIN2|UNC53H2	neuron navigator 2	protein-coding
chr11	27948705	27948874	Intergenic	Arthur1|DNA|hAT-Tip100	-129573	NR_030341	693195		NR_030341		MIR610	MIRN610|hsa-mir-610	microRNA 610	miscRNA
chr11	72335647	72335816	intron (NM_001143839, intron 1 of 29)	intron (NM_001143839, intron 1 of 29)	-9557	NR_029603	406931		NR_029603		MIR139	MIRN139	microRNA 139	miscRNA
chr11	66450062	66450231	Intergenic	MER33|DNA|hAT-Charlie	-4871	NM_031492	83759	Hs.618713	NM_031492	ENSG00000173914	RBM4B	RBM30|RBM4L|ZCCHC15|ZCRB3B	RNA binding motif protein 4B	protein-coding
chr11	64779867	64780036	Intergenic	L1M5|LINE|L1	-1634	NM_001667	402	Hs.502836	NM_001199745	ENSG00000213465	ARL2	ARFL2	ADP-ribosylation factor-like 2	protein-coding
chr11	27745340	27745509	Intergenic	Intergenic	-1819	NM_170731	627	Hs.502182	NM_001143805	ENSG00000176697	BDNF	ANON2|BULN2	brain-derived neurotrophic factor	protein-coding
chr11	102191464	102191633	intron (NM_001165, intron 1 of 8)	Charlie8|DNA|hAT-Charlie	3367	NM_001165	330	Hs.127799	NM_001165	ENSG00000023445	BIRC3	AIP1|API2|CIAP2|HAIP1|HIAP1|MALT2|MIHC|RNF49|c-IAP2	baculoviral IAP repeat containing 3	protein-coding
chr11	3870170	3870339	Intergenic	L2c|LINE|L2	-6679	NM_003156	6786	Hs.501735	NM_003156	ENSG00000167323	STIM1	D11S4896E|GOK|STIM1L	stromal interaction molecule 1	protein-coding
chr11	48062611	48062780	intron (NM_001098503, intron 1 of 8)	L2c|LINE|L2	60585	NM_002843	5795	Hs.318547	NM_001098503	ENSG00000149177	PTPRJ	CD148|DEP1|HPTPeta|R-PTP-ETA|SCC1	protein tyrosine phosphatase, receptor type, J	protein-coding
chr11	63970082	63970251	intron (NM_006819, intron 10 of 13)	L1MC4|LINE|L1	-3986	NM_178443	83706	Hs.180535	NM_031471	ENSG00000149781	FERMT3	KIND3|MIG-2|MIG2B|UNC112C|URP2|URP2SF	fermitin family member 3	protein-coding
chr11	17486938	17487107	intron (NM_000352, intron 3 of 38)	MIRc|SINE|MIR	11427	NM_000352	6833	Hs.54470	NM_000352	ENSG00000006071	ABCC8	ABC36|HHF1|HI|HRINS|MRP8|PHHI|SUR|SUR1|SUR1delta2|TNDM2	ATP-binding cassette, sub-family C (CFTR/MRP), member 8	protein-coding
chr11	62675119	62675288	TTS (NM_000738)	TTS (NM_000738)	13809	NM_000738	1128	Hs.632119	NM_000738	ENSG00000168539	CHRM1	HM1|M1|M1R	cholinergic receptor, muscarinic 1	protein-coding
chr11	65227690	65227859	Intergenic	MER74A|LTR|ERVL	15845	NR_030343	693197		NR_030343		MIR612	MIRN612|hsa-mir-612	microRNA 612	miscRNA
chr11	65778990	65779159	promoter-TSS (NM_001323)	promoter-TSS (NM_001323)	-388	NM_001323	1474	Hs.139389	NM_001323	ENSG00000175315	CST6	-	cystatin E/M	protein-coding
chr11	8714706	8714875	TTS (NM_139157)	TTS (NM_139157)	7804	NR_002977	677826	Hs.739914	NR_002977		SNORA45	ACA3-2	small nucleolar RNA, H/ACA box 45	snoRNA
chr11	63387517	63387686	Intergenic	Intergenic	-5660	NM_001128203	11145	Hs.502775	NM_001128203	ENSG00000176485	PLA2G16	AdPLA|H-REV107-1|HRASLS3|HREV107|HREV107-1|HREV107-3|HRSL3	phospholipase A2, group XVI	protein-coding
chr11	65880047	65880216	intron (NM_018026, intron 1 of 23)	L2a|LINE|L2	42307	NM_018026	55690	Hs.644326	NM_018026	ENSG00000175115	PACS1	-	phosphofurin acidic cluster sorting protein 1	protein-coding
chr11	1791985	1792154	Intergenic	L2a|LINE|L2	-6568	NM_053005	81532	Hs.370360	NM_001172223	ENSG00000182208	MOB2	HCCA2	MOB kinase activator 2	protein-coding
chr11	64444992	64445161	intron (NM_015080, intron 6 of 22)	intron (NM_015080, intron 6 of 22)	-34289	NM_138734	9379	Hs.372938	NM_015080	ENSG00000110076	NRXN2	-	neurexin 2	protein-coding
chr11	66226108	66226277	Intergenic	MSTA|LTR|ERVL-MaLR	-7606	NM_001243135	246330	Hs.656875	NM_001098510	ENSG00000174516	PELI3	-	pellino E3 ubiquitin protein ligase family member 3	protein-coding
chr11	93917192	93917361	Intergenic	Intergenic	55182	NM_015368	24145	Hs.591976	NM_015368	ENSG00000110218	PANX1	MRS1|PX1|UNQ2529	pannexin 1	protein-coding
chr11	45793958	45794127	TTS (NR_027134)	TTS (NR_027134)	1059	NR_027134	374387	Hs.632142	NR_027134		DKFZp779M0652	-	uncharacterized DKFZp779M0652	miscRNA
chr11	5475132	5475301	exon (NM_001004754, exon 1 of 1)	exon (NM_001004754, exon 1 of 1)	578	NM_001004754	390064	Hs.553733	NM_001004754	ENSG00000187918	OR51I2	OR11-38	olfactory receptor, family 51, subfamily I, member 2	protein-coding
chr11	10339316	10339485	Intergenic	Intergenic	12758	NM_001124	133	Hs.441047	NM_001124	ENSG00000148926	ADM	AM	adrenomedullin	protein-coding
chr11	57713348	57713517	Intergenic	Intergenic	-77921	NM_001005212	219956	Hs.689841	NM_001005212	ENSG00000186509	OR9Q1	-	olfactory receptor, family 9, subfamily Q, member 1	protein-coding
chr11	61739992	61740161	Intergenic	Intergenic	-4944	NM_002032	2495	Hs.645560	NM_002032	ENSG00000167996	FTH1	FHC|FTH|FTHL6|PIG15|PLIF	ferritin, heavy polypeptide 1	protein-coding
chr11	35029826	35029995	Intergenic	Intergenic	66526	NR_039836	100616437		NR_039836		MIR1343	-	microRNA 1343	miscRNA
chr11	56959566	56959735	TTS (NM_001005210)	TTS (NM_001005210)	10429	NM_001005210	219527	Hs.199853	NM_001005210	ENSG00000183908	LRRC55	-	leucine rich repeat containing 55	protein-coding
chr11	64237146	64237315	Intergenic	MLT1C|LTR|ERVL-MaLR	20701	NR_073177	100996455	Hs.634142	XM_003846433	ENSG00000181908	LOC100996455	-	uncharacterized LOC100996455	miscRNA
chr11	96044607	96044776	intron (NM_032427, intron 1 of 4)	intron (NM_032427, intron 1 of 4)	-29911	NR_036125	100422991		NR_036125		MIR1260B	-	microRNA 1260b	miscRNA
chr11	107029783	107029952	Intergenic	MER21-int|LTR|ERVL	-140696	NM_001256424	2977	Hs.24321	NM_000855	ENSG00000152402	GUCY1A2	GC-SA2|GUC1A2	guanylate cyclase 1, soluble, alpha 2	protein-coding
chr11	62281334	62281503	intron (NM_024060, intron 4 of 5)	intron (NM_024060, intron 4 of 5)	32914	NM_024060	79026	Hs.502756	NM_001620	ENSG00000124942	AHNAK	AHNAKRS	AHNAK nucleoprotein	protein-coding
chr11	19706201	19706370	intron (NM_001111018, intron 1 of 37)	intron (NM_001111018, intron 1 of 37)	-28596	NM_145117	89797	Hs.639428	NM_001111018	ENSG00000166833	NAV2	HELAD1|POMFIL2|RAINB1|STEERIN2|UNC53H2	neuron navigator 2	protein-coding
chr11	44596252	44596421	intron (NM_001024844, intron 1 of 8)	L1ME4a|LINE|L1	9195	NM_001024844	3732	Hs.527778	NM_001024844	ENSG00000085117	CD82	4F9|C33|GR15|IA4|KAI1|R2|SAR2|ST6|TSPAN27	CD82 molecule	protein-coding
chr11	63652180	63652349	intron (NM_001163296, intron 1 of 16)	intron (NM_001163296, intron 1 of 16)	-3723	NM_017490	2011	Hs.567261	NM_001039469	ENSG00000072518	MARK2	EMK-1|EMK1|PAR-1|Par-1b|Par1b	MAP/microtubule affinity-regulating kinase 2	protein-coding
chr11	66689388	66689557	intron (NM_000920, intron 2 of 21)	intron (NM_000920, intron 2 of 21)	-14132	NM_022172	5091	Hs.89890	NM_000920	ENSG00000173599	PC	PCB	pyruvate carboxylase	protein-coding
chr11	65893657	65893826	intron (NM_018026, intron 1 of 23)	intron (NM_018026, intron 1 of 23)	55917	NM_018026	55690	Hs.644326	NM_018026	ENSG00000175115	PACS1	-	phosphofurin acidic cluster sorting protein 1	protein-coding
chr11	46368199	46368368	promoter-TSS (NM_003646)	promoter-TSS (NM_003646)	-673	NM_003646	8525	Hs.502461	NM_001105540	ENSG00000149091	DGKZ	DAGK5|DAGK6|DGK-ZETA|hDGKzeta	diacylglycerol kinase, zeta	protein-coding
chr11	11249893	11250062	Intergenic	LTR16E1|LTR|ERVL	124927	NM_001256686	283106	Hs.741126	NR_002207		CSNK2A1P	-	casein kinase 2, alpha 1 polypeptide pseudogene	protein-coding
chr11	92619135	92619304	intron (NM_001008781, intron 23 of 24)	intron (NM_001008781, intron 23 of 24)	-83570	NM_005959	4544	Hs.569039	NM_005959	ENSG00000134640	MTNR1B	FGQTL2|MEL-1B-R|MT2	melatonin receptor 1B	protein-coding
chr11	102524870	102525039	Intergenic	Intergenic	-28891	NM_004771	9313	Hs.591946	NM_004771	ENSG00000137674	MMP20	AI2A2|MMP-20	matrix metallopeptidase 20	protein-coding
chr11	19395898	19396067	intron (NM_001111018, intron 1 of 37)	intron (NM_001111018, intron 1 of 37)	23711	NM_001111018	89797	Hs.639428	NM_001111018	ENSG00000166833	NAV2	HELAD1|POMFIL2|RAINB1|STEERIN2|UNC53H2	neuron navigator 2	protein-coding
chr11	65702405	65702574	Intergenic	L1M4|LINE|L1	-10626	NM_152762	254187	Hs.350671	NM_152762		TSGA10IP	FAM161C	testis specific, 10 interacting protein	protein-coding
chr11	86462324	86462493	Intergenic	MLT1F2|LTR|ERVL-MaLR	-49083	NM_007173	11098	Hs.25338	NM_007173	ENSG00000150687	PRSS23	SIG13|SPUVE|ZSIG13	protease, serine, 23	protein-coding
chr11	11783188	11783357	Intergenic	MER21C|LTR|ERVL	-79698	NM_017944	55031	Hs.577256	NM_017944	ENSG00000170242	USP47	TRFP	ubiquitin specific peptidase 47	protein-coding
chr11	66749748	66749917	Intergenic	MIR|SINE|MIR	7078	NM_001136485	254439	Hs.232604	NM_001136485	ENSG00000173237	C11orf86	-	chromosome 11 open reading frame 86	protein-coding
chr11	70101505	70101674	Intergenic	MLT1B|LTR|ERVL-MaLR	-15217	NR_045286	8500	Hs.708791	NM_003626	ENSG00000131626	PPFIA1	LIP.1|LIP1|LIPRIN	protein tyrosine phosphatase, receptor type, f polypeptide (PTPRF), interacting protein (liprin), alpha 1	protein-coding
chr11	100423275	100423444	Intergenic	MER5A1|DNA|hAT-Charlie	-135048	NM_152432	143872	Hs.741465	NM_152432	ENSG00000165895	ARHGAP42	GRAF3	Rho GTPase activating protein 42	protein-coding
chr11	63947165	63947334	Intergenic	MLT1H1|LTR|ERVL-MaLR	-6338	NM_006819	10963	Hs.337295	NM_006819	ENSG00000168439	STIP1	HOP|IEF-SSP-3521|P60|STI1|STI1L	stress-induced-phosphoprotein 1	protein-coding
chr11	47546293	47546462	promoter-TSS (NM_001172639)	promoter-TSS (NM_001172639)	-837	NM_001172639	10658	Hs.595333	NM_001025596	ENSG00000149187	CELF1	BRUNOL2|CUG-BP|CUGBP|CUGBP1|EDEN-BP|NAB50|NAPOR|hNab50	CUGBP, Elav-like family member 1	protein-coding
chr11	109643634	109643803	Intergenic	Intergenic	-320369	NM_033390	85463	Hs.376289	NM_033390	ENSG00000149289	ZC3H12C	MCPIP3	zinc finger CCCH-type containing 12C	protein-coding
chr11	62623269	62623438	promoter-TSS (NR_002563)	promoter-TSS (NR_002563)	7	NR_003098	23642	Hs.655643	NR_003098		SNHG1	LINC00057|NCRNA00057|U22HG|UHG	small nucleolar RNA host gene 1 (non-protein coding)	miscRNA
chr11	1016956	1017125	exon (NM_005961, exon 31 of 33)	exon (NM_005961, exon 31 of 33)	19666	NM_005961	4588	Hs.528432	NM_005961	ENSG00000184956	MUC6	MUC-6	mucin 6, oligomeric mucus/gel-forming	protein-coding
chr11	10326581	10326750	promoter-TSS (NM_001124)	promoter-TSS (NM_001124)	23	NM_001124	133	Hs.441047	NM_001124	ENSG00000148926	ADM	AM	adrenomedullin	protein-coding
chr11	130668285	130668454	Intergenic	Intergenic	118013	NM_014758	399979	Hs.444024	NM_014758	ENSG00000120451	SNX19	CHET8	sorting nexin 19	protein-coding
chr11	65214442	65214611	Intergenic	Intergenic	2597	NR_030343	693197		NR_030343		MIR612	MIRN612|hsa-mir-612	microRNA 612	miscRNA
chr11	47856222	47856391	intron (NM_015231, intron 7 of 35)	intron (NM_015231, intron 7 of 35)	13751	NM_015231	23279	Hs.731939	NM_015231	ENSG00000030066	NUP160	-	nucleoporin 160kDa	protein-coding
chr11	64700444	64700613	intron (NM_006244, intron 12 of 13)	intron (NM_006244, intron 12 of 13)	2832	NM_130769	170589	Hs.436119	NM_130769	ENSG00000149735	GPHA2	A2|GPA2|ZSIG51	glycoprotein hormone alpha 2	protein-coding
chr11	61361831	61362000	Intergenic	L2a|LINE|L2	-13571	NM_001252065	9066	Hs.684589	NM_001252065	ENSG00000011347	SYT7	IPCA-7|IPCA7|PCANAP7|SYT-VII|SYTVII	synaptotagmin VII	protein-coding
chr11	48387307	48387476	Intergenic	Intergenic	-13392	NM_001005513	403257	Hs.554533	NM_001005513		OR4C45	-	olfactory receptor, family 4, subfamily C, member 45	protein-coding
chr11	6238385	6238554	intron (NM_032127, intron 9 of 11)	intron (NM_032127, intron 9 of 11)	11671	NM_173525	160298	Hs.278221	NM_173525	ENSG00000180878	C11orf42	-	chromosome 11 open reading frame 42	protein-coding
chr11	45119835	45120004	intron (NR_046338, intron 2 of 7)	L2c|LINE|L2	4355	NR_046338	56981	Hs.178715	XM_003118628	ENSG00000019485	PRDM11	PFM8	PR domain containing 11	protein-coding
chr11	63867527	63867696	intron (NM_014067, intron 3 of 10)	MIRc|SINE|MIR	-3751	NM_013280	23769	Hs.584876	NM_013280	ENSG00000126500	FLRT1	-	fibronectin leucine rich transmembrane protein 1	protein-coding
chr11	1089761	1089930	intron (NM_002457, intron 26 of 49)	(CA)n|Simple_repeat|Simple_repeat	14970	NM_002457	4583	Hs.315	NM_002457	ENSG00000198788	MUC2	MLP|MUC-2|SMUC	mucin 2, oligomeric mucus/gel-forming	protein-coding
chr11	1766708	1766877	intron (NM_001170820, intron 2 of 2)	(CA)n|Simple_repeat|Simple_repeat	5032	NM_001170820	402778	Hs.121575	NM_001170820	ENSG00000244242	IFITM10	DSPA3	interferon induced transmembrane protein 10	protein-coding
chr11	28406102	28406271	Intergenic	L1PA13|LINE|L1	276388	NM_001113528	196074	Hs.243326	NM_001113528	ENSG00000169519	METTL15	METT5D1	methyltransferase like 15	protein-coding
chr12	13758922	13759091	intron (NM_000834, intron 9 of 12)	intron (NM_000834, intron 9 of 12)	-229327	NR_036555	283422	Hs.448717	NM_182558		C12orf36	-	chromosome 12 open reading frame 36	miscRNA
chr12	17092858	17093027	Intergenic	Intergenic	-48739	NR_036619	728622	Hs.741380	NR_036619		SKP1P2	SKP1B|p19B	S-phase kinase-associated protein 1 pseudogene 2	pseudo
chr12	10523455	10523624	Intergenic	HERVIP10F-int|LTR|ERV1	19114	NM_007360	22914	Hs.387787	NM_007360	ENSG00000213809	KLRK1	CD314|D12S2489E|KLR|NKG2-D|NKG2D	killer cell lectin-like receptor subfamily K, member 1	protein-coding
chr12	31973983	31974152	Intergenic	Intergenic	-28892	NM_001013699	440093	Hs.448697	NM_001013699	ENSG00000188375	H3F3C	H3.5	H3 histone, family 3C	protein-coding
chr12	22002910	22003079	intron (NM_020297, intron 22 of 37)	intron (NM_020297, intron 22 of 37)	-75239	NM_004982	3764	Hs.741642	NM_004982	ENSG00000121361	KCNJ8	KIR6.1|uKATP-1	potassium inwardly-rectifying channel, subfamily J, member 8	protein-coding
chr12	12077879	12078048	intron (NR_046487, intron 1 of 3)	intron (NR_046487, intron 1 of 3)	1144	NR_046487	100873754		NR_046487		RNU6-19	-	RNA, U6 small nuclear 19	snRNA
chr12	26512716	26512885	intron (NM_002223, intron 55 of 56)	intron (NM_002223, intron 55 of 56)	164294	NM_005086	8082	Hs.183428	NM_001135823	ENSG00000123096	SSPN	DAGA5|KRAG|NSPN|SPN1|SPN2	sarcospan	protein-coding
chr12	2586296	2586465	intron (NM_001129838, intron 5 of 45)	intron (NM_001129838, intron 5 of 45)	207438	NR_046769	100874370	Hs.653548	NR_046769		CACNA1C-IT3	-	CACNA1C intronic transcript 3 (non-protein coding)	miscRNA
chr12	131335345	131335514	Intergenic	(TG)n|Simple_repeat|Simple_repeat	-11610	NM_001980	2054	Hs.437585	NM_194356	ENSG00000111450	STX2	EPIM|EPM|STX2A|STX2B|STX2C	syntaxin 2	protein-coding
chr12	57505846	57506015	promoter-TSS (NM_001178080)	promoter-TSS (NM_001178080)	-734	NM_001178078	6778	Hs.524518	NM_001178078	ENSG00000166888	STAT6	D12S1644|IL-4-STAT|STAT6B|STAT6C	signal transducer and activator of transcription 6, interleukin-4 induced	protein-coding
chr12	47671908	47672077	Intergenic	Intergenic	-61766	NR_026544	100233209	Hs.657722	NR_026544		PCED1B-AS1	-	PCED1B antisense RNA 1	miscRNA
chr12	27661473	27661642	Intergenic	Intergenic	-15488	NM_177444	8496	Hs.172445	NM_001198915	ENSG00000110841	PPFIBP1	L2|SGT2|hSGT2|hSgt2p	PTPRF interacting protein, binding protein 1 (liprin beta 1)	protein-coding
chr12	51837540	51837709	intron (NM_001267615, intron 2 of 14)	intron (NM_001267615, intron 2 of 14)	18723	NM_001258403	9498	Hs.4749	NM_001039960	ENSG00000050438	SLC4A8	NBC3|NDCBE	solute carrier family 4, sodium bicarbonate cotransporter, member 8	protein-coding
chr12	5276270	5276439	Intergenic	Intergenic	123269	NM_002234	3741	Hs.741439	NM_002234	ENSG00000130037	KCNA5	ATFB7|HCK1|HK2|HPCN1|KV1.5|PCN1	potassium voltage-gated channel, shaker-related subfamily, member 5	protein-coding
chr12	132907617	132907786	Intergenic	(TG)n|Simple_repeat|Simple_repeat	-1796	NM_001122636	50614	Hs.658249	NM_001122636	ENSG00000182870	GALNT9	GALNAC-T9	UDP-N-acetyl-alpha-D-galactosamine:polypeptide N-acetylgalactosaminyltransferase 9 (GalNAc-T9)	protein-coding
chr12	6773389	6773558	Intergenic	Intergenic	-1165	NM_001127586	51147	Hs.524210	NM_001127582	ENSG00000111653	ING4	my036|p29ING4	inhibitor of growth family, member 4	protein-coding
chr12	7959572	7959741	Intergenic	Intergenic	17661	NM_024865	79923	Hs.635882	NM_024865	ENSG00000111704	NANOG	-	Nanog homeobox	protein-coding
chr12	25251003	25251172	intron (NM_006152, intron 14 of 20)	L2|LINE|L2	45906	NM_006152	4033	Hs.124922	NM_001204126	ENSG00000118308	LRMP	JAW1	lymphoid-restricted membrane protein	protein-coding
chr12	18533056	18533225	intron (NM_004570, intron 12 of 31)	intron (NM_004570, intron 12 of 31)	118666	NM_004570	5288	Hs.22500	NM_004570	ENSG00000139144	PIK3C2G	PI3K-C2GAMMA	phosphatidylinositol-4-phosphate 3-kinase, catalytic subunit type 2 gamma	protein-coding
chr12	7256471	7256640	intron (NM_016546, intron 2 of 5)	HAL1|LINE|L1	-4349	NR_026947	283314	Hs.741447	NR_026947		C1RL-AS1	MATL2963	C1RL antisense RNA 1	miscRNA
chr12	125314923	125315092	intron (NM_001082959, intron 1 of 11)	L1ME2|LINE|L1	33512	NM_005505	949	Hs.731377	NM_001082959	ENSG00000073060	SCARB1	CD36L1|CLA-1|CLA1|HDLQTL6|SR-BI|SRB1	scavenger receptor class B, member 1	protein-coding
chr12	69799391	69799560	Intergenic	MER44C|DNA|TcMar-Tigger	45943	NM_006530	8089	Hs.4029	NM_006530	ENSG00000127337	YEATS4	4930573H17Rik|B230215M10Rik|GAS41|NUBI-1|YAF9	YEATS domain containing 4	protein-coding
chr12	13118833	13119002	Intergenic	Intergenic	-13854	NR_038920	100506314	Hs.659383	NR_038920		LOC100506314	-	uncharacterized LOC100506314	miscRNA
chr12	556717	556886	Intergenic	AluJo|SINE|Alu	-12742	NM_173593	283358	Hs.504416	NM_173593	ENSG00000139044	B4GALNT3	-	beta-1,4-N-acetyl-galactosaminyl transferase 3	protein-coding
chr12	31123241	31123410	intron (NM_001080509, intron 3 of 7)	intron (NM_001080509, intron 3 of 7)	43487	NM_001080509	441631	Hs.505141	NM_001080509	ENSG00000110900	TSPAN11	VSSW1971	tetraspanin 11	protein-coding
chr12	19758678	19758847	Intergenic	LTR16D|LTR|ERVL	165247	NM_001267043	121536	Hs.126497	NM_001114176	ENSG00000139154	AEBP2	-	AE binding protein 2	protein-coding
chr12	30570689	30570858	Intergenic	Intergenic	259405	NM_001190995	10526	Hs.505136	NM_001190995	ENSG00000133704	IPO8	RANBP8	importin 8	protein-coding
chr12	12204110	12204279	Intergenic	Intergenic	-19684	NM_138723	79370	Hs.210343	NM_030766	ENSG00000121380	BCL2L14	BCLG	BCL2-like 14 (apoptosis facilitator)	protein-coding
chr12	58299146	58299315	Intergenic	Intergenic	30717	NR_038269	100506844	Hs.90286	NR_038269		LOC100506844	-	uncharacterized LOC100506844	miscRNA
chr12	11462841	11463010	intron (NM_001261399, intron 1 of 4)	L2|LINE|L2	444	NM_001261399	5545	Hs.528651	NM_001261399	ENSG00000230657	PRB4	Po	proline-rich protein BstNI subfamily 4	protein-coding
chr12	13534878	13535047	Intergenic	Intergenic	-5283	NR_036555	283422	Hs.448717	NM_182558		C12orf36	-	chromosome 12 open reading frame 36	miscRNA
chr12	11779121	11779290	Intergenic	AluJr|SINE|Alu	-23583	NM_001987	2120	Hs.504765	NM_001987	ENSG00000139083	ETV6	TEL|TEL/ABL	ets variant 6	protein-coding
chr12	76371799	76371968	Intergenic	Intergenic	53673	NM_007350	22822	Hs.602085	NM_007350	ENSG00000139289	PHLDA1	DT1P1B11|PHRIP|TDAG51	pleckstrin homology-like domain, family A, member 1	protein-coding
chr12	10184647	10184816	intron (NM_207345, intron 1 of 8)	L1MC|LINE|L1	1455	NM_207345	283420	Hs.531189	NM_207345	ENSG00000197992	CLEC9A	DNGR1|UNQ9341	C-type lectin domain family 9, member A	protein-coding
chr12	15986069	15986238	Intergenic	Intergenic	-43643	NM_004447	2059	Hs.591160	NM_004447	ENSG00000151491	EPS8	-	epidermal growth factor receptor pathway substrate 8	protein-coding
chr12	2102660	2102829	intron (NM_152640, intron 2 of 8)	intron (NM_152640, intron 2 of 8)	10933	NM_152640	196513	Hs.130934	NM_152640	ENSG00000151065	DCP1B	DCP1|hDcp1b	DCP1 decapping enzyme homolog B (S. cerevisiae)	protein-coding
chr12	46054138	46054307	Intergenic	LTR16B1|LTR|ERVL	67482	NR_028408	400027	Hs.597122	NR_028408		LOC400027	-	uncharacterized LOC400027	miscRNA
chr12	8178918	8179087	Intergenic	Intergenic	-6357	NM_018416	55810	Hs.120844	NM_018416	ENSG00000065970	FOXJ2	FHX	forkhead box J2	protein-coding
chr12	33158367	33158536	Intergenic	Intergenic	-108671	NM_001005242	5318	Hs.164384	NM_001005242	ENSG00000057294	PKP2	ARVD9	plakophilin 2	protein-coding
chr12	94014691	94014860	Intergenic	Intergenic	48473	NM_001270471	8835	Hs.737206	NM_001270467	ENSG00000120833	SOCS2	CIS2|Cish2|SOCS-2|SSI-2|SSI2|STATI2	suppressor of cytokine signaling 2	protein-coding
chr12	48217658	48217827	Intergenic	Intergenic	-3979	NM_015401	51564	Hs.200063	NM_001098416	ENSG00000061273	HDAC7	HD7A|HDAC7A	histone deacetylase 7	protein-coding
chr12	6608126	6608295	intron (NM_014865, intron 2 of 31)	MER44B|DNA|TcMar-Tigger	4912	NM_014865	9918	Hs.5719	NM_014865	ENSG00000010292	NCAPD2	CAP-D2|CNAP1|hCAP-D2	non-SMC condensin I complex, subunit D2	protein-coding
chr12	123227648	123227817	Intergenic	MLT1C|LTR|ERVL-MaLR	-9639	NM_003677	8562	Hs.22393	NM_003677	ENSG00000139726	DENR	DRP|DRP1|SMAP-3	density-regulated protein	protein-coding
chr12	26257504	26257673	Intergenic	L2a|LINE|L2	20415	NM_030762	79365	Hs.177841	NM_030762	ENSG00000123095	BHLHE41	BHLHB3|DEC2|SHARP1|hDEC2	basic helix-loop-helix family, member e41	protein-coding
chr12	27612656	27612825	Intergenic	MLT1J|LTR|ERVL-MaLR	-7003	NM_001145010	341346	Hs.282121	NM_001145010	ENSG00000165935	C12orf70	-	chromosome 12 open reading frame 70	protein-coding
chr12	1268413	1268582	intron (NM_178039, intron 7 of 17)	MER1B|DNA|hAT-Charlie	168093	NR_027946	23085	Hs.601216	NM_178039	ENSG00000082805	ERC1	Cast2|ELKS|RAB6IP2	ELKS/RAB6-interacting/CAST family member 1	protein-coding
chr12	24844347	24844516	Intergenic	MSTB|LTR|ERVL-MaLR	-107329	NR_029451	144360	Hs.350668	NM_144667		LINC00477	C12orf67|FAM191B	long intergenic non-protein coding RNA 477	miscRNA
chr12	96429670	96429839	promoter-TSS (NM_000895)	promoter-TSS (NM_000895)	-315	NM_000895	4048	Hs.524648	NM_000895	ENSG00000111144	LTA4H	-	leukotriene A4 hydrolase	protein-coding
chr12	49514924	49515093	Intergenic	Intergenic	10296	NM_006082	10376	Hs.524390	NM_006082	ENSG00000123416	TUBA1B	K-ALPHA-1	tubulin, alpha 1b	protein-coding
chr12	7035382	7035551	intron (NM_001007026, intron 1 of 9)	intron (NM_001007026, intron 1 of 9)	1840	NM_001007026	1822	Hs.143766	NM_001007026	ENSG00000111676	ATN1	B37|D12S755E|DRPLA|HRS|NOD	atrophin 1	protein-coding
chr12	3731451	3731620	intron (NM_001144958, intron 17 of 19)	MIR3|SINE|MIR	130831	NM_001144958	84766	Hs.504534	NM_001144959	ENSG00000130038	EFCAB4B	CRACR2A	EF-hand calcium binding domain 4B	protein-coding
chr12	4947889	4948058	intron (NM_002235, intron 1 of 1)	MLT1B|LTR|ERVL-MaLR	29631	NM_002235	3742	Hs.306190	NM_002235	ENSG00000151079	KCNA6	HBK2|KV1.6	potassium voltage-gated channel, shaker-related subfamily, member 6	protein-coding
chr12	12801770	12801939	Intergenic	MSTA-int|LTR|ERVL-MaLR	37023	NM_001310	1389	Hs.591156	NM_001310	ENSG00000111269	CREBL2	-	cAMP responsive element binding protein-like 2	protein-coding
chr12	14727696	14727865	Intergenic	Intergenic	-6989	NM_024829	79887	Hs.131933	NM_024829	ENSG00000121316	PLBD1	-	phospholipase B domain containing 1	protein-coding
chr12	29297019	29297188	Intergenic	LTR25-int|LTR|ERV1	-79495	NM_018099	55711	Hs.741332	NM_018099	ENSG00000064763	FAR2	MLSTD1|SDR10E2	fatty acyl CoA reductase 2	protein-coding
chr12	84216	84385	Intergenic	Intergenic	-3684	NR_028269	100288778	Hs.585931	NR_028269		LOC100288778	-	WAS protein family homolog 1 pseudogene	pseudo
chr12	6859861	6860030	intron (NM_005439, intron 4 of 8)	intron (NM_005439, intron 4 of 8)	2137	NM_005439	8079	Hs.524214	NM_005439	ENSG00000089693	MLF2	NTN4	myeloid leukemia factor 2	protein-coding
chr12	31540494	31540663	exon (NM_144973, exon 21 of 21)	exon (NM_144973, exon 21 of 21)	-61419	NM_001135812	58516	Hs.505154	NM_001135811	ENSG00000139146	FAM60A	C12orf14|TERA	family with sequence similarity 60, member A	protein-coding
chr12	28297004	28297173	Intergenic	Intergenic	-113045	NM_018318	55297	Hs.653125	NM_018318	ENSG00000123106	CCDC91	p56	coiled-coil domain containing 91	protein-coding
chr12	5531828	5531997	Intergenic	Intergenic	-9368	NM_001102654	4908	Hs.99171	NM_001102654	ENSG00000185652	NTF3	HDNF|NGF-2|NGF2|NT3	neurotrophin 3	protein-coding
chr12	31388499	31388668	Intergenic	Intergenic	-88667	NR_026806	79857	Hs.534485	NM_024799		FLJ13224	-	uncharacterized LOC79857	miscRNA
chr12	6465624	6465793	intron (NM_001038, intron 4 of 12)	intron (NM_001038, intron 4 of 12)	-14425	NM_001065	7132	Hs.279594	NM_001065	ENSG00000067182	TNFRSF1A	CD120a|FPF|MS5|TBP1|TNF-R|TNF-R-I|TNF-R55|TNFAR|TNFR1|TNFR1-d2|TNFR55|TNFR60|p55|p55-R|p60	tumor necrosis factor receptor superfamily, member 1A	protein-coding
chr12	96821302	96821471	Intergenic	Intergenic	-27020	NM_001170464	5128	Hs.506415	NM_001170464	ENSG00000059758	CDK17	PCTAIRE2|PCTK2	cyclin-dependent kinase 17	protein-coding
chr12	7586031	7586200	exon (NM_174941, exon 3 of 20)	exon (NM_174941, exon 3 of 20)	10634	NM_174941	283316	Hs.631727	NM_174941	ENSG00000177675	CD163L1	CD163B|M160	CD163 molecule-like 1	protein-coding
chr12	103954417	103954586	Intergenic	MIR|SINE|MIR	-26568	NM_017564	55576	Hs.408249	NM_017564	ENSG00000136011	STAB2	FEEL2|FELE-2|FELL2|FEX2|HARE	stabilin 2	protein-coding
chr12	30220918	30221087	Intergenic	Tigger4|DNA|TcMar-Tigger	-283310	NM_175861	83857	Hs.401954	NM_001193451	ENSG00000133687	TMTC1	OLF|TMTC1A	transmembrane and tetratricopeptide repeat containing 1	protein-coding
chr12	31172522	31172691	Intergenic	MIR|SINE|MIR	-54173	NM_004399	1663	Hs.443960	NM_001257144	ENSG00000013573	DDX11	CHL1|CHLR1|KRG2|WABS	DEAD/H (Asp-Glu-Ala-Asp/His) box helicase 11	protein-coding
chr12	125676763	125676932	Intergenic	MIR|SINE|MIR	126922	NM_023928	65985	Hs.656073	NM_023928	ENSG00000081760	AACS	ACSF1|SUR-5	acetoacetyl-CoA synthetase	protein-coding
chr12	115342543	115342712	Intergenic	(TG)n|Simple_repeat|Simple_repeat	-220658	NM_005996	6926	Hs.129895	NM_005996	ENSG00000135111	TBX3	TBX3-ISO|UMS|XHL	T-box 3	protein-coding
chr12	16514159	16514328	intron (NM_001260512, intron 4 of 4)	intron (NM_001260512, intron 4 of 4)	7892	NM_145764	4257	Hs.389700	NM_001260511	ENSG00000008394	MGST1	GST12|MGST|MGST-I	microsomal glutathione S-transferase 1	protein-coding
chr12	125406257	125406426	Intergenic	tRNA-Ala-GCG|tRNA|tRNA	6248	NR_049820	100847004		NR_049820		MIR5188	-	microRNA 5188	miscRNA
chr12	96821244	96821413	Intergenic	Intergenic	-26962	NM_001170464	5128	Hs.506415	NM_001170464	ENSG00000059758	CDK17	PCTAIRE2|PCTK2	cyclin-dependent kinase 17	protein-coding
chr12	5945045	5945214	intron (NM_020373, intron 4 of 25)	intron (NM_020373, intron 4 of 25)	110269	NM_020373	57101	Hs.148970	NM_020373	ENSG00000047617	ANO2	C12orf3|TMEM16B	anoctamin 2	protein-coding
chr12	49520970	49521139	TTS (NM_006082)	TTS (NM_006082)	4250	NM_006082	10376	Hs.524390	NM_006082	ENSG00000123416	TUBA1B	K-ALPHA-1	tubulin, alpha 1b	protein-coding
chr12	50991370	50991539	intron (NM_173602, intron 1 of 37)	intron (NM_173602, intron 1 of 37)	92686	NM_173602	57609	Hs.505516	NM_173602	ENSG00000066084	DIP2B	-	DIP2 disco-interacting protein 2 homolog B (Drosophila)	protein-coding
chr12	15911026	15911195	intron (NM_004447, intron 1 of 20)	MLT1G3|LTR|ERVL-MaLR	31400	NM_004447	2059	Hs.591160	NM_004447	ENSG00000151491	EPS8	-	epidermal growth factor receptor pathway substrate 8	protein-coding
chr12	6980995	6981164	TTS (NM_001159287)	TTS (NM_001159287)	1370	NM_001146316	84727	Hs.479856	NM_001146316	ENSG00000111671	SPSB2	GRCC9|SSB2	splA/ryanodine receptor domain and SOCS box containing 2	protein-coding
chr12	115371462	115371631	Intergenic	Intergenic	-249577	NM_005996	6926	Hs.129895	NM_005996	ENSG00000135111	TBX3	TBX3-ISO|UMS|XHL	T-box 3	protein-coding
chr12	15949730	15949899	Intergenic	MER58B|DNA|hAT-Charlie	-7304	NM_004447	2059	Hs.591160	NM_004447	ENSG00000151491	EPS8	-	epidermal growth factor receptor pathway substrate 8	protein-coding
chr12	19195183	19195352	Intergenic	Arthur1|DNA|hAT-Tip100	-87359	NM_019012	54477	Hs.188614	NM_001143821	ENSG00000052126	PLEKHA5	PEPP-2|PEPP2	pleckstrin homology domain containing, family A member 5	protein-coding
chr12	11113978	11114147	intron (NR_037918, intron 4 of 10)	MER45R|DNA|hAT-Tip100	-22256	NM_023922	50840	Hs.731575	NM_023922	ENSG00000212127	TAS2R14	T2R14|TRB1	taste receptor, type 2, member 14	protein-coding
chr12	106128867	106129036	Intergenic	MLT1B|LTR|ERVL-MaLR	404537	NM_001145199	387882	Hs.368938	NM_207376	ENSG00000235162	C12orf75	AGD3|OCC-1|OCC1	chromosome 12 open reading frame 75	protein-coding
chr12	15910929	15911098	intron (NM_004447, intron 1 of 20)	MLT1G3|LTR|ERVL-MaLR	31497	NM_004447	2059	Hs.591160	NM_004447	ENSG00000151491	EPS8	-	epidermal growth factor receptor pathway substrate 8	protein-coding
chr12	28129246	28129415	Intergenic	Intergenic	-4414	NM_198965	5744	Hs.591159	NM_002820	ENSG00000087494	PTHLH	BDE2|HHM|PLP|PTHR|PTHRP	parathyroid hormone-like hormone	protein-coding
chr12	31932102	31932271	Intergenic	Intergenic	12989	NM_001013699	440093	Hs.448697	NM_001013699	ENSG00000188375	H3F3C	H3.5	H3 histone, family 3C	protein-coding
chr12	125084275	125084444	Intergenic	L1ME2|LINE|L1	-32349	NM_001206654	9612	Hs.137510	NM_001077261	ENSG00000196498	NCOR2	CTG26|N-CoR2|SMAP270|SMRT|SMRTE|SMRTE-tau|TNRC14|TRAC|TRAC-1|TRAC1	nuclear receptor corepressor 2	protein-coding
chr12	76371746	76371915	Intergenic	Intergenic	53726	NM_007350	22822	Hs.602085	NM_007350	ENSG00000139289	PHLDA1	DT1P1B11|PHRIP|TDAG51	pleckstrin homology-like domain, family A, member 1	protein-coding
chr12	105805469	105805638	Intergenic	LTR16C|LTR|ERVL	81139	NM_001145199	387882	Hs.368938	NM_207376	ENSG00000235162	C12orf75	AGD3|OCC-1|OCC1	chromosome 12 open reading frame 75	protein-coding
chr12	14000562	14000731	intron (NM_000834, intron 2 of 12)	GA-rich|Low_complexity|Low_complexity	132376	NM_000834	2904	Hs.654430	NM_000834	ENSG00000150086	GRIN2B	GluN2B|MRD6|NMDAR2B|NR2B|hNR3	glutamate receptor, ionotropic, N-methyl D-aspartate 2B	protein-coding
chr12	13983816	13983985	intron (NM_000834, intron 2 of 12)	MSTB1|LTR|ERVL-MaLR	149122	NM_000834	2904	Hs.654430	NM_000834	ENSG00000150086	GRIN2B	GluN2B|MRD6|NMDAR2B|NR2B|hNR3	glutamate receptor, ionotropic, N-methyl D-aspartate 2B	protein-coding
chr12	124808517	124808686	TTS (NM_001077261)	TTS (NM_001077261)	34891	NM_181709	144347	Hs.432901	NM_181709	ENSG00000178882	FAM101A	-	family with sequence similarity 101, member A	protein-coding
chr12	3080338	3080507	intron (NM_201443, intron 1 of 10)	L2b|LINE|L2	11674	NM_201443	7004	Hs.94865	NM_003213	ENSG00000197905	TEAD4	EFTR-2|RTEF1|TCF13L1|TEF-3|TEF3|TEFR-1|hRTEF-1B	TEA domain family member 4	protein-coding
chr12	16154423	16154592	intron (NM_015954, intron 6 of 8)	intron (NM_015954, intron 6 of 8)	90321	NM_015954	51071	Hs.39429	NM_015954	ENSG00000023697	DERA	DEOC	deoxyribose-phosphate aldolase (putative)	protein-coding
chr12	1822654	1822823	intron (NM_024551, intron 1 of 7)	HERV9-int|LTR|ERV1	22491	NM_024551	79602	Hs.371642	NM_024551	ENSG00000006831	ADIPOR2	ACDCR2|PAQR2	adiponectin receptor 2	protein-coding
chr12	4881710	4881879	TTS (NM_017417)	TTS (NM_017417)	-36548	NM_002235	3742	Hs.306190	NM_002235	ENSG00000151079	KCNA6	HBK2|KV1.6	potassium voltage-gated channel, shaker-related subfamily, member 6	protein-coding
chr12	11952423	11952592	intron (NR_046487, intron 1 of 3)	intron (NR_046487, intron 1 of 3)	126600	NR_046487	100873754		NR_046487		RNU6-19	-	RNA, U6 small nuclear 19	snRNA
chr12	32241794	32241963	Intergenic	Intergenic	-18307	NM_001003398	636	Hs.505202	NM_001003398	ENSG00000151746	BICD1	BICD	bicaudal D homolog 1 (Drosophila)	protein-coding
chr12	12931867	12932036	intron (NM_001130415, intron 1 of 1)	L2c|LINE|L2	-6590	NM_030817	81575	Hs.719938	NM_001130415	ENSG00000178878	APOLD1	VERGE	apolipoprotein L domain containing 1	protein-coding
chr12	13419114	13419283	Intergenic	Intergenic	69596	NM_001423	2012	Hs.719042	NM_001423	ENSG00000134531	EMP1	CL-20|EMP-1|TMP	epithelial membrane protein 1	protein-coding
chr12	7585906	7586075	exon (NM_174941, exon 3 of 20)	exon (NM_174941, exon 3 of 20)	10759	NM_174941	283316	Hs.631727	NM_174941	ENSG00000177675	CD163L1	CD163B|M160	CD163 molecule-like 1	protein-coding
chr12	45809232	45809401	intron (NM_001204803, intron 17 of 20)	intron (NM_001204803, intron 17 of 20)	122850	NM_001142678	196527	Hs.505339	NM_001025356	ENSG00000177119	ANO6	BDPLT7|SCTS|TMEM16F	anoctamin 6	protein-coding
chr12	69453362	69453531	Intergenic	L2b|LINE|L2	-96426	NM_001874	1368	Hs.654387	NM_001005502	ENSG00000135678	CPM	-	carboxypeptidase M	protein-coding
chr12	93293256	93293425	intron (NM_003566, intron 1 of 28)	intron (NM_003566, intron 1 of 28)	29767	NM_003566	8411	Hs.567367	NM_003566	ENSG00000102189	EEA1	MST105|MSTP105|ZFYVE2	early endosome antigen 1	protein-coding
chr12	388333	388502	TTS (NM_001042603)	TTS (NM_001042603)	-16378	NM_016615	6540	Hs.733878	NM_001190997	ENSG00000010379	SLC6A13	GAT-2|GAT2	solute carrier family 6 (neurotransmitter transporter, GABA), member 13	protein-coding
chr12	124915639	124915808	intron (NM_001206654, intron 10 of 47)	(CA)n|Simple_repeat|Simple_repeat	136287	NM_006312	9612	Hs.137510	NM_001077261	ENSG00000196498	NCOR2	CTG26|N-CoR2|SMAP270|SMRT|SMRTE|SMRTE-tau|TNRC14|TRAC|TRAC-1|TRAC1	nuclear receptor corepressor 2	protein-coding
chr12	14199763	14199932	Intergenic	(CA)n|Simple_repeat|Simple_repeat	-66825	NM_000834	2904	Hs.654430	NM_000834	ENSG00000150086	GRIN2B	GluN2B|MRD6|NMDAR2B|NR2B|hNR3	glutamate receptor, ionotropic, N-methyl D-aspartate 2B	protein-coding
chr12	90485094	90485263	Intergenic	Intergenic	382446	NR_028138	338758	Hs.601766	NR_028138		LOC338758	-	uncharacterized LOC338758	miscRNA
chr12	32351532	32351701	intron (NM_001003398, intron 1 of 8)	intron (NM_001003398, intron 1 of 8)	91431	NM_001714	636	Hs.505202	NM_001003398	ENSG00000151746	BICD1	BICD	bicaudal D homolog 1 (Drosophila)	protein-coding
chr12	27726743	27726912	intron (NM_177444, intron 1 of 28)	AluJo|SINE|Alu	49782	NM_001198916	8496	Hs.172445	NM_001198915	ENSG00000110841	PPFIBP1	L2|SGT2|hSGT2|hSgt2p	PTPRF interacting protein, binding protein 1 (liprin beta 1)	protein-coding
chr12	10516801	10516970	Intergenic	HERV15-int|LTR|ERV1	25768	NM_007360	22914	Hs.387787	NM_007360	ENSG00000213809	KLRK1	CD314|D12S2489E|KLR|NKG2-D|NKG2D	killer cell lectin-like receptor subfamily K, member 1	protein-coding
chr12	21633393	21633562	intron (NM_002907, intron 6 of 14)	LTR50|LTR|ERVL	21126	NM_032941	5965	Hs.235069	NM_002907	ENSG00000004700	RECQL	RECQL1|RecQ1	RecQ protein-like (DNA helicase Q1-like)	protein-coding
chr12	5974404	5974573	intron (NM_020373, intron 3 of 25)	intron (NM_020373, intron 3 of 25)	80910	NM_020373	57101	Hs.148970	NM_020373	ENSG00000047617	ANO2	C12orf3|TMEM16B	anoctamin 2	protein-coding
chr12	131249108	131249277	Intergenic	Intergenic	74627	NM_194356	2054	Hs.437585	NM_194356	ENSG00000111450	STX2	EPIM|EPM|STX2A|STX2B|STX2C	syntaxin 2	protein-coding
chr12	95377906	95378075	intron (NM_001258338, intron 2 of 2)	intron (NM_001258338, intron 2 of 2)	19499	NM_018838	55967	Hs.506374	NM_001258338	ENSG00000184752	NDUFA12	B17.2|DAP13	NADH dehydrogenase (ubiquinone) 1 alpha subcomplex, 12	protein-coding
chr12	23388313	23388482	Intergenic	Intergenic	349149	NM_178010	6660	Hs.657542	NM_001261414	ENSG00000134532	SOX5	L-SOX5	SRY (sex determining region Y)-box 5	protein-coding
chr12	102929559	102929728	Intergenic	Intergenic	-55265	NM_001111283	3479	Hs.160562	NM_000618	ENSG00000017427	IGF1	IGF-I|IGF1A|IGFI	insulin-like growth factor 1 (somatomedin C)	protein-coding
chr12	13251583	13251752	intron (NM_001080554, intron 1 of 6)	intron (NM_001080554, intron 1 of 6)	-2927	NM_001206845	83445	Hs.240053	NM_001080554	ENSG00000111305	GSG1	-	germ cell associated 1	protein-coding
chr12	50077438	50077607	intron (NM_198900, intron 1 of 24)	L2c|LINE|L2	23675	NM_198900	91010	Hs.179838	NM_175736	ENSG00000161791	FMNL3	FHOD3|WBP-3|WBP3	formin-like 3	protein-coding
chr12	32414286	32414455	intron (NM_001003398, intron 2 of 8)	intron (NM_001003398, intron 2 of 8)	154185	NM_001714	636	Hs.505202	NM_001003398	ENSG00000151746	BICD1	BICD	bicaudal D homolog 1 (Drosophila)	protein-coding
chr12	6709885	6710054	intron (NM_001273, intron 7 of 39)	intron (NM_001273, intron 7 of 39)	6582	NM_001273	1108	Hs.162233	NM_001273	ENSG00000111642	CHD4	Mi-2b|Mi2-BETA	chromodomain helicase DNA binding protein 4	protein-coding
chr12	19184047	19184216	Intergenic	Intergenic	-98495	NM_019012	54477	Hs.188614	NM_001143821	ENSG00000052126	PLEKHA5	PEPP-2|PEPP2	pleckstrin homology domain containing, family A member 5	protein-coding
chr12	27771963	27772132	intron (NM_001198915, intron 2 of 26)	intron (NM_001198915, intron 2 of 26)	-77381	NM_001029874	387849	Hs.269836	NM_001029874	ENSG00000174236	REP15	RAB15EP	RAB15 effector protein	protein-coding
chr12	28776956	28777125	Intergenic	MLT1C|LTR|ERVL-MaLR	366907	NM_018318	55297	Hs.653125	NM_018318	ENSG00000123106	CCDC91	p56	coiled-coil domain containing 91	protein-coding
chr12	15384645	15384814	Intergenic	Intergenic	-10318	NM_001190726	85004	Hs.199487	NM_001190726	ENSG00000134533	RERG	-	RAS-like, estrogen-regulated, growth inhibitor	protein-coding
chr12	20120065	20120234	Intergenic	Intergenic	-47470	NR_040098	100506393	Hs.658356	NR_040098		LOC100506393	-	uncharacterized LOC100506393	miscRNA
chr12	3065521	3065690	Intergenic	Intergenic	-2873	NM_003213	7004	Hs.94865	NM_003213	ENSG00000197905	TEAD4	EFTR-2|RTEF1|TCF13L1|TEF-3|TEF3|TEFR-1|hRTEF-1B	TEA domain family member 4	protein-coding
chr12	619083	619252	intron (NM_173593, intron 1 of 19)	intron (NM_173593, intron 1 of 19)	49624	NM_173593	283358	Hs.504416	NM_173593	ENSG00000139044	B4GALNT3	-	beta-1,4-N-acetyl-galactosaminyl transferase 3	protein-coding
chr12	29081780	29081949	Intergenic	Intergenic	-294734	NM_018099	55711	Hs.741332	NM_018099	ENSG00000064763	FAR2	MLSTD1|SDR10E2	fatty acyl CoA reductase 2	protein-coding
chr12	5816114	5816283	intron (NM_020373, intron 15 of 25)	THE1D|LTR|ERVL-MaLR	212900	NM_002527	4908	Hs.99171	NM_001102654	ENSG00000185652	NTF3	HDNF|NGF-2|NGF2|NT3	neurotrophin 3	protein-coding
chr12	6867732	6867901	Intergenic	L2a|LINE|L2	-5180	NR_026581	8079	Hs.524214	NM_005439	ENSG00000089693	MLF2	NTN4	myeloid leukemia factor 2	protein-coding
chr12	127715428	127715597	Intergenic	LTR8|LTR|ERV1	-356276	NR_033970	440117	Hs.127100	NR_033970		LOC440117	-	uncharacterized LOC440117	miscRNA
chr12	11664663	11664832	Intergenic	L1MB3|LINE|L1	-36217	NR_033890	338817	Hs.733066	NR_033890		LOC338817	-	uncharacterized LOC338817	miscRNA
chr12	13463291	13463460	Intergenic	Intergenic	66304	NR_036555	283422	Hs.448717	NM_182558		C12orf36	-	chromosome 12 open reading frame 36	miscRNA
chr12	33747776	33747945	Intergenic	MER66B|LTR|ERV1	-155106	NM_198992	341359	Hs.118703	NM_198992	ENSG00000110975	SYT10	-	synaptotagmin X	protein-coding
chr12	1404211	1404380	intron (NM_178039, intron 14 of 17)	MIRc|SINE|MIR	-205362	NR_028415	100292680	Hs.391695	NR_028415		LOC100292680	-	uncharacterized LOC100292680	miscRNA
chr12	8013240	8013409	intron (NM_153449, intron 3 of 11)	intron (NM_153449, intron 3 of 11)	12171	NM_153449	144195	Hs.655169	NM_153449	ENSG00000173262	SLC2A14	GLUT14|SLC2A3P3	solute carrier family 2 (facilitated glucose transporter), member 14	protein-coding
chr12	681797	681966	intron (NM_016533, intron 1 of 3)	MIRb|SINE|MIR	90874	NM_016533	4815	Hs.656450	NM_016533	ENSG00000171840	NINJ2	-	ninjurin 2	protein-coding
chr12	27600026	27600195	Intergenic	L2b|LINE|L2	-19633	NM_001145010	341346	Hs.282121	NM_001145010	ENSG00000165935	C12orf70	-	chromosome 12 open reading frame 70	protein-coding
chr12	6137212	6137381	intron (NM_000552, intron 22 of 51)	intron (NM_000552, intron 22 of 51)	-81898	NM_020373	57101	Hs.148970	NM_020373	ENSG00000047617	ANO2	C12orf3|TMEM16B	anoctamin 2	protein-coding
chr12	57039975	57040144	promoter-TSS (NM_001686)	promoter-TSS (NM_001686)	-207	NM_001686	506	Hs.406510	NM_001686	ENSG00000110955	ATP5B	ATPMB|ATPSB	ATP synthase, H+ transporting, mitochondrial F1 complex, beta polypeptide	protein-coding
chr12	13711690	13711859	Intergenic	Intergenic	-182095	NR_036555	283422	Hs.448717	NM_182558		C12orf36	-	chromosome 12 open reading frame 36	miscRNA
chr12	26726598	26726767	intron (NM_002223, intron 34 of 56)	L2a|LINE|L2	259449	NM_002223	3709	Hs.512235	NM_002223	ENSG00000123104	ITPR2	IP3R2	inositol 1,4,5-trisphosphate receptor, type 2	protein-coding
chr12	24699401	24699570	intron (NM_152989, intron 1 of 17)	L2c|LINE|L2	15898	NM_152989	6660	Hs.657542	NM_001261414	ENSG00000134532	SOX5	L-SOX5	SRY (sex determining region Y)-box 5	protein-coding
chr12	123493470	123493639	intron (NM_020845, intron 5 of 24)	intron (NM_020845, intron 5 of 24)	1721	NR_036187	100422931		NR_036187		MIR4304	-	microRNA 4304	miscRNA
chr12	121582469	121582638	intron (NR_033953, intron 1 of 10)	L2c|LINE|L2	11922	NR_033955	5027	Hs.729169	NM_002562	ENSG00000089041	P2RX7	P2X7	purinergic receptor P2X, ligand-gated ion channel, 7	protein-coding
chr12	48728577	48728746	Intergenic	LTR77|LTR|ERV1	5898	NM_181788	341567	Hs.155833	NM_181788	ENSG00000187166	H1FNT	H1T2	H1 histone family, member N, testis-specific	protein-coding
chr12	68048291	68048460	intron (NM_006482, intron 2 of 2)	intron (NM_006482, intron 2 of 2)	5863	NM_003583	8445	Hs.173135	NM_003583	ENSG00000127334	DYRK2	-	dual-specificity tyrosine-(Y)-phosphorylation regulated kinase 2	protein-coding
chr12	1086509	1086678	Intergenic	MER50C|LTR|ERV1	-13811	NR_027949	23085	Hs.601216	NM_178039	ENSG00000082805	ERC1	Cast2|ELKS|RAB6IP2	ELKS/RAB6-interacting/CAST family member 1	protein-coding
chr12	121661356	121661525	intron (NR_046372, intron 6 of 12)	intron (NR_046372, intron 6 of 12)	13776	NM_002560	5025	Hs.321709	NM_001256796	ENSG00000135124	P2RX4	P2X4|P2X4R	purinergic receptor P2X, ligand-gated ion channel, 4	protein-coding
chr12	58477655	58477824	Intergenic	Intergenic	142294	NM_033276	91419	Hs.61188	NM_033276	ENSG00000166896	XRCC6BP1	KUB3	XRCC6 binding protein 1	protein-coding
chr12	9515818	9515987	Intergenic	MIR3|SINE|MIR	79649	NR_024374	642846	Hs.447869	NR_024374		LOC642846	-	DEAD/H (Asp-Glu-Ala-Asp/His) box polypeptide 11-like	miscRNA
chr12	131249997	131250166	Intergenic	HAL1-2a_MD|LINE|L1	73738	NM_194356	2054	Hs.437585	NM_194356	ENSG00000111450	STX2	EPIM|EPM|STX2A|STX2B|STX2C	syntaxin 2	protein-coding
chr12	18144615	18144784	Intergenic	Intergenic	98415	NM_024730	79785	Hs.732831	NM_024730	ENSG00000111404	RERGL	-	RERG/RAS-like	protein-coding
chr12	13679612	13679781	Intergenic	GA-rich|Low_complexity|Low_complexity	-150017	NR_036555	283422	Hs.448717	NM_182558		C12orf36	-	chromosome 12 open reading frame 36	miscRNA
chr12	14841676	14841845	intron (NM_004963, intron 1 of 26)	L2b|LINE|L2	7759	NM_004963	2984	Hs.524278	NM_004963	ENSG00000070019	GUCY2C	DIAR6|GUC2C|MUCIL|STAR	guanylate cyclase 2C (heat stable enterotoxin receptor)	protein-coding
chr12	26952891	26953060	intron (NM_002223, intron 1 of 56)	L1MEb|LINE|L1	33156	NM_002223	3709	Hs.512235	NM_002223	ENSG00000123104	ITPR2	IP3R2	inositol 1,4,5-trisphosphate receptor, type 2	protein-coding
chr12	117564136	117564305	Intergenic	Intergenic	-26969	NR_031766	54997	Hs.525709	NM_001168325	ENSG00000088992	TESC	CHP3|TSC	tescalcin	protein-coding
chr12	13139682	13139851	intron (NM_015987, intron 3 of 3)	intron (NM_015987, intron 3 of 3)	6995	NR_038920	100506314	Hs.659383	NR_038920		LOC100506314	-	uncharacterized LOC100506314	miscRNA
chr12	31926972	31927141	Intergenic	LTR79|LTR|ERVL	18119	NM_001013699	440093	Hs.448697	NM_001013699	ENSG00000188375	H3F3C	H3.5	H3 histone, family 3C	protein-coding
chr12	5480510	5480679	Intergenic	Intergenic	-60686	NM_001102654	4908	Hs.99171	NM_001102654	ENSG00000185652	NTF3	HDNF|NGF-2|NGF2|NT3	neurotrophin 3	protein-coding
chr12	15032840	15033009	Intergenic	L1MEc|LINE|L1	5929	NM_000900	4256	Hs.365706	NM_000900	ENSG00000111341	MGP	MGLAP|NTI	matrix Gla protein	protein-coding
chr12	13371899	13372068	Intergenic	Intergenic	22381	NM_001423	2012	Hs.719042	NM_001423	ENSG00000134531	EMP1	CL-20|EMP-1|TMP	epithelial membrane protein 1	protein-coding
chr12	4169204	4169373	Intergenic	Intergenic	-186680	NM_020367	57097	Hs.657268	NM_020367	ENSG00000111224	PARP11	ARTD11|C12orf6	poly (ADP-ribose) polymerase family, member 11	protein-coding
chr12	18905614	18905783	Intergenic	LTR16A|LTR|ERVL	14653	NM_033328	93661	Hs.131288	NM_033328	ENSG00000177938	CAPZA3	CAPPA3|Gsg3	capping protein (actin filament) muscle Z-line, alpha 3	protein-coding
chr12	133095043	133095212	intron (NM_001142641, intron 2 of 16)	(TCCA)n|Simple_repeat|Simple_repeat	27970	NM_001142641	57666	Hs.656668	XM_003403652	ENSG00000112787	FBRSL1	-	fibrosin-like 1	protein-coding
chr12	11803742	11803911	intron (NM_001987, intron 1 of 7)	intron (NM_001987, intron 1 of 7)	1038	NM_001987	2120	Hs.504765	NM_001987	ENSG00000139083	ETV6	TEL|TEL/ABL	ets variant 6	protein-coding
chr12	25547089	25547258	Intergenic	L2|LINE|L2	-143319	NM_033360	3845	Hs.505033	NM_004985	ENSG00000133703	KRAS	C-K-RAS|K-RAS2A|K-RAS2B|K-RAS4A|K-RAS4B|KI-RAS|KRAS1|KRAS2|NS|NS3|RASK2	v-Ki-ras2 Kirsten rat sarcoma viral oncogene homolog	protein-coding
chr12	27975189	27975358	Intergenic	Intergenic	42086	NM_020782	57542	Hs.505104	NM_020782	ENSG00000087448	KLHDC5	Ctb9	kelch domain containing 5	protein-coding
chr12	7109587	7109756	intron (NM_005768, intron 1 of 12)	intron (NM_005768, intron 1 of 12)	16171	NM_005768	10162	Hs.655248	NM_005768	ENSG00000111684	LPCAT3	C3F|LPCAT|LPLAT 5|LPSAT|MBOAT5|OACT5|nessy	lysophosphatidylcholine acyltransferase 3	protein-coding
chr12	20243995	20244164	intron (NR_040098, intron 2 of 2)	intron (NR_040098, intron 2 of 2)	76460	NR_040098	100506393	Hs.658356	NR_040098		LOC100506393	-	uncharacterized LOC100506393	miscRNA
chr12	11982193	11982362	intron (NR_046487, intron 1 of 3)	MIR|SINE|MIR	96830	NR_046487	100873754		NR_046487		RNU6-19	-	RNA, U6 small nuclear 19	snRNA
chr12	25204257	25204426	promoter-TSS (NM_001204127)	promoter-TSS (NM_001204127)	-840	NM_001204127	4033	Hs.124922	NM_001204126	ENSG00000118308	LRMP	JAW1	lymphoid-restricted membrane protein	protein-coding
chr12	131249936	131250105	Intergenic	HAL1-2a_MD|LINE|L1	73799	NM_194356	2054	Hs.437585	NM_194356	ENSG00000111450	STX2	EPIM|EPM|STX2A|STX2B|STX2C	syntaxin 2	protein-coding
chr12	25062683	25062852	intron (NM_001178091, intron 1 of 9)	MLT1F|LTR|ERVL-MaLR	-6758	NM_001178093	586	Hs.438993	NM_001178091	ENSG00000060982	BCAT1	BCATC|BCT1|ECA39|MECA39|PNAS121|PP18	branched chain amino-acid transaminase 1, cytosolic	protein-coding
chr12	29945708	29945877	Intergenic	Intergenic	-8100	NM_175861	83857	Hs.401954	NM_001193451	ENSG00000133687	TMTC1	OLF|TMTC1A	transmembrane and tetratricopeptide repeat containing 1	protein-coding
chr12	7286662	7286831	intron (NM_014718, intron 3 of 17)	MIRb|SINE|MIR	3779	NM_014718	9746	Hs.535378	NM_014718	ENSG00000139182	CLSTN3	CDHR14|CSTN3|alcbeta	calsyntenin 3	protein-coding
chr12	33339749	33339918	Intergenic	L1PA16|LINE|L1	252921	NM_198992	341359	Hs.118703	NM_198992	ENSG00000110975	SYT10	-	synaptotagmin X	protein-coding
chr12	8179352	8179521	Intergenic	Intergenic	-5923	NM_018416	55810	Hs.120844	NM_018416	ENSG00000065970	FOXJ2	FHX	forkhead box J2	protein-coding
chr12	4770983	4771152	intron (NM_005002, intron 5 of 10)	L2a|LINE|L2	12803	NM_005002	4704	Hs.75227	NM_005002	ENSG00000139180	NDUFA9	CC6|CI-39k|CI39k|NDUFS2L|SDR22E1	NADH dehydrogenase (ubiquinone) 1 alpha subcomplex, 9, 39kDa	protein-coding
chr12	127715497	127715666	Intergenic	LTR8|LTR|ERV1	-356345	NR_033970	440117	Hs.127100	NR_033970		LOC440117	-	uncharacterized LOC440117	miscRNA
chr12	133032253	133032422	Intergenic	(TG)n|Simple_repeat|Simple_repeat	-34820	NM_001142641	57666	Hs.656668	XM_003403652	ENSG00000112787	FBRSL1	-	fibrosin-like 1	protein-coding
chr12	13147658	13147827	intron (NM_015987, intron 1 of 3)	L2a|LINE|L2	5501	NM_015987	50865	Hs.642618	NM_015987	ENSG00000013583	HEBP1	HBP|HEBP	heme binding protein 1	protein-coding
chr12	66338529	66338698	intron (NM_003483, intron 3 of 4)	intron (NM_003483, intron 3 of 4)	-117859	NR_026825	204010	Hs.558686	NR_026825		RPSAP52	RPSA_17_1251	ribosomal protein SA pseudogene 52	pseudo
chr12	28722420	28722589	Intergenic	MIR3|SINE|MIR	312371	NM_018318	55297	Hs.653125	NM_018318	ENSG00000123106	CCDC91	p56	coiled-coil domain containing 91	protein-coding
chr12	45674134	45674303	intron (NM_001204803, intron 2 of 20)	intron (NM_001204803, intron 2 of 20)	-12248	NM_001142678	196527	Hs.505339	NM_001025356	ENSG00000177119	ANO6	BDPLT7|SCTS|TMEM16F	anoctamin 6	protein-coding
chr12	26033088	26033257	Intergenic	L2c|LINE|L2	-6160	NR_036188	100422897		NR_036188		MIR4302	-	microRNA 4302	miscRNA
chr12	128650547	128650716	Intergenic	MIRb|SINE|MIR	-101317	NM_001136103	92293	Hs.49599	NM_001136103	ENSG00000181234	TMEM132C	-	transmembrane protein 132C	protein-coding
chr12	2042066	2042235	intron (NR_036546, intron 1 of 1)	(TG)n|Simple_repeat|Simple_repeat	3592	NR_036546	100271702	Hs.737031	NR_036546		LOC100271702	-	uncharacterized LOC100271702	miscRNA
chr12	132061105	132061274	Intergenic	Intergenic	-134443	NM_004592	6433	Hs.308171	NM_001261411	ENSG00000061936	SFSWAP	SFRS8|SWAP	splicing factor, suppressor of white-apricot homolog (Drosophila)	protein-coding
chr12	66042966	66043135	Intergenic	Intergenic	-175190	NM_003484	8091	Hs.505924	NM_003483	ENSG00000149948	HMGA2	BABL|HMGI-C|HMGIC|LIPO|STQTL9	high mobility group AT-hook 2	protein-coding
chr12	13490588	13490757	Intergenic	Intergenic	39007	NR_036555	283422	Hs.448717	NM_182558		C12orf36	-	chromosome 12 open reading frame 36	miscRNA
chr12	121826560	121826729	Intergenic	Intergenic	-11242	NM_025126	80196	Hs.292804	NM_001256858	ENSG00000170633	RNF34	CARP-1|CARP1|RFI|RIF|RIFF|hRFI	ring finger protein 34, E3 ubiquitin protein ligase	protein-coding
chr12	6897655	6897824	promoter-TSS (NM_001195017)	promoter-TSS (NM_001195017)	-899	NM_001195015	920	Hs.631659	NM_000616	ENSG00000010610	CD4	CD4mut	CD4 molecule	protein-coding
chr12	124808388	124808557	TTS (NM_001077261)	TTS (NM_001077261)	34762	NM_181709	144347	Hs.432901	NM_181709	ENSG00000178882	FAM101A	-	family with sequence similarity 101, member A	protein-coding
chr12	33126271	33126440	Intergenic	MLT1F|LTR|ERVL-MaLR	-76575	NM_001005242	5318	Hs.164384	NM_001005242	ENSG00000057294	PKP2	ARVD9	plakophilin 2	protein-coding
chr12	93293268	93293437	intron (NM_003566, intron 1 of 28)	intron (NM_003566, intron 1 of 28)	29755	NM_003566	8411	Hs.567367	NM_003566	ENSG00000102189	EEA1	MST105|MSTP105|ZFYVE2	early endosome antigen 1	protein-coding
chr12	90189176	90189345	Intergenic	LTR33|LTR|ERVL	86528	NR_028138	338758	Hs.601766	NR_028138		LOC338758	-	uncharacterized LOC338758	miscRNA
chr12	32258718	32258887	Intergenic	MIRb|SINE|MIR	-1383	NM_001003398	636	Hs.505202	NM_001003398	ENSG00000151746	BICD1	BICD	bicaudal D homolog 1 (Drosophila)	protein-coding
chr12	64575290	64575459	Intergenic	Intergenic	40702	NM_152440	144577	Hs.505871	NM_152440	ENSG00000174206	C12orf66	-	chromosome 12 open reading frame 66	protein-coding
chr12	98897208	98897377	intron (NR_038383, intron 1 of 3)	tRNA-Asp-GAY|tRNA|tRNA	341	NR_038383	643770	Hs.129589	NR_038383		LOC643770	-	uncharacterized LOC643770	miscRNA
chr12	132971060	132971229	Intergenic	(CA)n|Simple_repeat|Simple_repeat	-65239	NM_001122636	50614	Hs.658249	NM_001122636	ENSG00000182870	GALNT9	GALNAC-T9	UDP-N-acetyl-alpha-D-galactosamine:polypeptide N-acetylgalactosaminyltransferase 9 (GalNAc-T9)	protein-coding
chr12	13245092	13245261	intron (NM_001080554, intron 1 of 6)	intron (NM_001080554, intron 1 of 6)	3564	NM_031289	83445	Hs.240053	NM_001080554	ENSG00000111305	GSG1	-	germ cell associated 1	protein-coding
chr12	3485623	3485792	Intergenic	MIR3|SINE|MIR	-4808	NM_001256536	56341	Hs.504530	NM_001256537	ENSG00000111218	PRMT8	HRMT1L3|HRMT1L4	protein arginine methyltransferase 8	protein-coding
chr12	1925937	1926106	intron (NM_172364, intron 26 of 37)	(CA)n|Simple_repeat|Simple_repeat	-3412	NM_001163926	654429	Hs.585579	NM_001039029	ENSG00000166159	LRTM2	-	leucine-rich repeats and transmembrane domains 2	protein-coding
chr12	96429681	96429850	promoter-TSS (NM_000895)	promoter-TSS (NM_000895)	-326	NM_000895	4048	Hs.524648	NM_000895	ENSG00000111144	LTA4H	-	leukotriene A4 hydrolase	protein-coding
chr12	15960465	15960634	Intergenic	Intergenic	-18039	NM_004447	2059	Hs.591160	NM_004447	ENSG00000151491	EPS8	-	epidermal growth factor receptor pathway substrate 8	protein-coding
chr12	5673430	5673599	intron (NM_020373, intron 25 of 25)	intron (NM_020373, intron 25 of 25)	70216	NM_002527	4908	Hs.99171	NM_001102654	ENSG00000185652	NTF3	HDNF|NGF-2|NGF2|NT3	neurotrophin 3	protein-coding
chr12	94566816	94566985	intron (NM_005761, intron 2 of 30)	intron (NM_005761, intron 2 of 30)	24401	NM_005761	10154	Hs.584845	NM_005761	ENSG00000136040	PLXNC1	CD232|PLXN-C1|VESPR	plexin C1	protein-coding
chr12	8599818	8599987	Intergenic	SATR1|Satellite|Satellite	-8689	NM_001007033	93978	Hs.591147	NM_001007033	ENSG00000205846	CLEC6A	CLEC4N|CLECSF10	C-type lectin domain family 6, member A	protein-coding
chr12	9814783	9814952	Intergenic	LTR45B|LTR|ERV1	-7437	NM_001197319	29121	Hs.268326	NM_001004419	ENSG00000069493	CLEC2D	CLAX|LLT1|OCIL	C-type lectin domain family 2, member D	protein-coding
chr12	49315075	49315244	TTS (NM_016594)	TTS (NM_016594)	3505	NM_001143781	51303	Hs.655103	NM_001143781	ENSG00000134285	FKBP11	FKBP19	FK506 binding protein 11, 19 kDa	protein-coding
chr12	3500805	3500974	intron (NM_001256536, intron 1 of 9)	L2b|LINE|L2	10374	NM_001256536	56341	Hs.504530	NM_001256537	ENSG00000111218	PRMT8	HRMT1L3|HRMT1L4	protein arginine methyltransferase 8	protein-coding
chr12	94128608	94128777	intron (NM_003805, intron 2 of 2)	L2c|LINE|L2	57541	NM_003805	8738	Hs.591016	NM_003805	ENSG00000169372	CRADD	MRT34|RAIDD	CASP2 and RIPK1 domain containing adaptor with death domain	protein-coding
chr12	56553995	56554164	exon (NM_021019, exon 5 of 7)	exon (NM_021019, exon 5 of 7)	2034	NM_079423	4637	Hs.632717	NM_021019	ENSG00000092841	MYL6	ESMLC|LC17|LC17-GI|LC17-NM|LC17A|LC17B|MLC-3|MLC1SM|MLC3NM|MLC3SM	myosin, light chain 6, alkali, smooth muscle and non-muscle	protein-coding
chr12	11884988	11885157	intron (NM_001987, intron 1 of 7)	intron (NM_001987, intron 1 of 7)	82284	NM_001987	2120	Hs.504765	NM_001987	ENSG00000139083	ETV6	TEL|TEL/ABL	ets variant 6	protein-coding
chr12	8113599	8113768	Intergenic	Intergenic	-24791	NM_006931	6515	Hs.419240	NM_006931	ENSG00000059804	SLC2A3	GLUT3	solute carrier family 2 (facilitated glucose transporter), member 3	protein-coding
chr12	29946509	29946678	Intergenic	Intergenic	-8901	NM_175861	83857	Hs.401954	NM_001193451	ENSG00000133687	TMTC1	OLF|TMTC1A	transmembrane and tetratricopeptide repeat containing 1	protein-coding
chr12	19445378	19445547	intron (NM_001143821, intron 14 of 27)	intron (NM_001143821, intron 14 of 27)	87203	NM_001256787	54477	Hs.188614	NM_001143821	ENSG00000052126	PLEKHA5	PEPP-2|PEPP2	pleckstrin homology domain containing, family A member 5	protein-coding
chr12	116813041	116813210	Intergenic	(TG)n|Simple_repeat|Simple_repeat	52998	NR_039683	100616309		NR_039683		MIR4472-2	-	microRNA 4472-2	miscRNA
chr12	13633941	13634110	Intergenic	Intergenic	-104346	NR_036555	283422	Hs.448717	NM_182558		C12orf36	-	chromosome 12 open reading frame 36	miscRNA
chr12	103954444	103954613	Intergenic	MIR|SINE|MIR	-26541	NM_017564	55576	Hs.408249	NM_017564	ENSG00000136011	STAB2	FEEL2|FELE-2|FELL2|FEX2|HARE	stabilin 2	protein-coding
chr12	8234516	8234685	promoter-TSS (NM_015509)	promoter-TSS (NM_015509)	-207	NR_024260	25977	Hs.555927	NM_015509	ENSG00000089818	NECAP1	-	NECAP endocytosis associated 1	protein-coding
chr12	33126360	33126529	Intergenic	MLT1F|LTR|ERVL-MaLR	-76664	NM_001005242	5318	Hs.164384	NM_001005242	ENSG00000057294	PKP2	ARVD9	plakophilin 2	protein-coding
chr12	69928355	69928524	intron (NM_001042555, intron 4 of 9)	intron (NM_001042555, intron 4 of 9)	-50064	NR_037476	100500868		NR_037476		MIR3913-2	-	microRNA 3913-2	miscRNA
chr12	44054011	44054180	Intergenic	Intergenic	98466	NM_001098615	83448	Hs.445814	NM_001098614	ENSG00000129317	PUS7L	-	pseudouridylate synthase 7 homolog (S. cerevisiae)-like	protein-coding
chr12	19294637	19294806	intron (NM_019012, intron 3 of 25)	intron (NM_019012, intron 3 of 25)	12095	NM_001190860	54477	Hs.188614	NM_001143821	ENSG00000052126	PLEKHA5	PEPP-2|PEPP2	pleckstrin homology domain containing, family A member 5	protein-coding
chr12	32266053	32266222	intron (NM_001003398, intron 1 of 8)	intron (NM_001003398, intron 1 of 8)	5952	NM_001714	636	Hs.505202	NM_001003398	ENSG00000151746	BICD1	BICD	bicaudal D homolog 1 (Drosophila)	protein-coding
chr12	6648009	6648178	TTS (NM_001039670)	TTS (NM_001039670)	3684	NM_001256799	2597	Hs.598320	NM_001256799	ENSG00000111640	GAPDH	G3PD|GAPD	glyceraldehyde-3-phosphate dehydrogenase	protein-coding
chr12	9533469	9533638	Intergenic	Intergenic	67215	NR_033399	440081	Hs.504688	NM_004400		DDX12P	CHLR2|DDX12	DEAD/H (Asp-Glu-Ala-Asp/His) box polypeptide 12, pseudogene	pseudo
chr12	131249149	131249318	Intergenic	HAL1-2a_MD|LINE|L1	74586	NM_194356	2054	Hs.437585	NM_194356	ENSG00000111450	STX2	EPIM|EPM|STX2A|STX2B|STX2C	syntaxin 2	protein-coding
chr12	19184052	19184221	Intergenic	Intergenic	-98490	NM_019012	54477	Hs.188614	NM_001143821	ENSG00000052126	PLEKHA5	PEPP-2|PEPP2	pleckstrin homology domain containing, family A member 5	protein-coding
chr12	5276243	5276412	Intergenic	Intergenic	123242	NM_002234	3741	Hs.741439	NM_002234	ENSG00000130037	KCNA5	ATFB7|HCK1|HK2|HPCN1|KV1.5|PCN1	potassium voltage-gated channel, shaker-related subfamily, member 5	protein-coding
chr12	27484868	27485037	promoter-TSS (NM_001248005)	promoter-TSS (NM_001248005)	-835	NM_001248005	56938	Hs.445447	NM_001248002	ENSG00000029153	ARNTL2	BMAL2|CLIF|MOP9|PASD9|bHLHe6	aryl hydrocarbon receptor nuclear translocator-like 2	protein-coding
chr12	2582160	2582329	intron (NM_001129838, intron 5 of 45)	intron (NM_001129838, intron 5 of 45)	203302	NR_046769	100874370	Hs.653548	NR_046769		CACNA1C-IT3	-	CACNA1C intronic transcript 3 (non-protein coding)	miscRNA
chr12	19979945	19980114	Intergenic	Intergenic	-187590	NR_040098	100506393	Hs.658356	NR_040098		LOC100506393	-	uncharacterized LOC100506393	miscRNA
chr12	13590010	13590179	Intergenic	Intergenic	-60415	NR_036555	283422	Hs.448717	NM_182558		C12orf36	-	chromosome 12 open reading frame 36	miscRNA
chr12	32720290	32720459	intron (NM_139241, intron 2 of 16)	MER20|DNA|hAT-Charlie	65333	NM_139241	121512	Hs.117835	NM_139241	ENSG00000139132	FGD4	CMT4H|FRABP|ZFYVE6	FYVE, RhoGEF and PH domain containing 4	protein-coding
chr12	7294333	7294502	intron (NM_014718, intron 9 of 17)	intron (NM_014718, intron 9 of 17)	11450	NM_014718	9746	Hs.535378	NM_014718	ENSG00000139182	CLSTN3	CDHR14|CSTN3|alcbeta	calsyntenin 3	protein-coding
chr12	18787609	18787778	intron (NM_004570, intron 30 of 31)	ERVL-B4-int|LTR|ERVL	103300	NM_033123	89869	Hs.97542	NM_033123	ENSG00000139151	PLCZ1	NYD-SP27|PLC-zeta-1|PLCzeta	phospholipase C, zeta 1	protein-coding
chr12	4803772	4803941	Intergenic	MIRb|SINE|MIR	-25896	NM_017417	26290	Hs.511985	NM_017417	ENSG00000130035	GALNT8	GALNAC-T8	UDP-N-acetyl-alpha-D-galactosamine:polypeptide N-acetylgalactosaminyltransferase 8 (GalNAc-T8)	protein-coding
chr12	94205135	94205304	intron (NM_003805, intron 2 of 2)	intron (NM_003805, intron 2 of 2)	134068	NM_003805	8738	Hs.591016	NM_003805	ENSG00000169372	CRADD	MRT34|RAIDD	CASP2 and RIPK1 domain containing adaptor with death domain	protein-coding
chr12	32456536	32456705	intron (NM_001003398, intron 3 of 8)	MLT1J|LTR|ERVL-MaLR	196435	NM_001714	636	Hs.505202	NM_001003398	ENSG00000151746	BICD1	BICD	bicaudal D homolog 1 (Drosophila)	protein-coding
chr12	6927030	6927199	intron (NM_000616, intron 7 of 9)	(CA)n|Simple_repeat|Simple_repeat	-3849	NM_019858	27239	Hs.631654	NM_014449	ENSG00000250510	GPR162	A-2|GRCA	G protein-coupled receptor 162	protein-coding
chr12	51884539	51884708	intron (NM_001039960, intron 19 of 24)	L2a|LINE|L2	65722	NM_001258403	9498	Hs.4749	NM_001039960	ENSG00000050438	SLC4A8	NBC3|NDCBE	solute carrier family 4, sodium bicarbonate cotransporter, member 8	protein-coding
chr12	46774004	46774173	Intergenic	MLT1F|LTR|ERVL-MaLR	-7443	NM_018976	54407	Hs.221847	NM_018976	ENSG00000134294	SLC38A2	ATA2|PRO1068|SAT2|SNAT2	solute carrier family 38, member 2	protein-coding
chr12	98897249	98897418	intron (NR_038383, intron 1 of 3)	tRNA-Asp-GAY|tRNA|tRNA	300	NR_038383	643770	Hs.129589	NR_038383		LOC643770	-	uncharacterized LOC643770	miscRNA
chr12	1520689	1520858	intron (NR_027948, intron 18 of 19)	intron (NR_027948, intron 18 of 19)	-88884	NR_028415	100292680	Hs.391695	NR_028415		LOC100292680	-	uncharacterized LOC100292680	miscRNA
chr12	25982276	25982445	Intergenic	Intergenic	44652	NR_036188	100422897		NR_036188		MIR4302	-	microRNA 4302	miscRNA
chr12	24295753	24295922	intron (NM_152989, intron 4 of 17)	L1ME2|LINE|L1	-69518	NR_030625	100126320		NR_030625		MIR920	MIRN920|hsa-mir-920	microRNA 920	miscRNA
chr12	7246541	7246710	TTS (NM_016546)	TTS (NM_016546)	-1582	NM_001733	715	Hs.524224	NM_001733	ENSG00000159403	C1R	-	complement component 1, r subcomponent	protein-coding
chr12	89743771	89743940	intron (NM_022652, intron 1 of 1)	intron (NM_022652, intron 1 of 1)	2441	NM_001946	1848	Hs.718640	NM_001946	ENSG00000139318	DUSP6	MKP3|PYST1	dual specificity phosphatase 6	protein-coding
chr12	6702480	6702649	intron (NM_001273, intron 16 of 39)	intron (NM_001273, intron 16 of 39)	-11789	NR_003012	677780	Hs.689692	NR_003012		SCARNA11	ACA57	small Cajal body-specific RNA 11	miscRNA
chr12	25099503	25099672	intron (NM_001178091, intron 1 of 9)	LTR23|LTR|ERV1	2806	NM_001178091	586	Hs.438993	NM_001178091	ENSG00000060982	BCAT1	BCATC|BCT1|ECA39|MECA39|PNAS121|PP18	branched chain amino-acid transaminase 1, cytosolic	protein-coding
chr12	6951843	6952012	intron (NM_002075, intron 4 of 10)	MER63A|DNA|hAT-Blackjack	2552	NM_002075	2784	Hs.631657	NM_002075	ENSG00000111664	GNB3	-	guanine nucleotide binding protein (G protein), beta polypeptide 3	protein-coding
chr12	13063239	13063408	intron (NM_003979, intron 2 of 3)	intron (NM_003979, intron 2 of 3)	-5440	NR_030345	693199		NR_030345		MIR614	MIRN614|hsa-mir-614	microRNA 614	miscRNA
chr12	13234269	13234438	3' UTR (NM_020853, exon 13 of 13)	3' UTR (NM_020853, exon 13 of 13)	14387	NM_031289	83445	Hs.240053	NM_001080554	ENSG00000111305	GSG1	-	germ cell associated 1	protein-coding
chr12	2965242	2965411	intron (NR_038933, intron 2 of 3)	MIR|SINE|MIR	19344	NR_038933	100507424	Hs.709471	NR_038933		LOC100507424	-	uncharacterized LOC100507424	miscRNA
chr12	69799395	69799564	Intergenic	MER44C|DNA|TcMar-Tigger	45947	NM_006530	8089	Hs.4029	NM_006530	ENSG00000127337	YEATS4	4930573H17Rik|B230215M10Rik|GAS41|NUBI-1|YAF9	YEATS domain containing 4	protein-coding
chr12	29946587	29946756	Intergenic	Intergenic	-8979	NM_175861	83857	Hs.401954	NM_001193451	ENSG00000133687	TMTC1	OLF|TMTC1A	transmembrane and tetratricopeptide repeat containing 1	protein-coding
chr12	19635274	19635443	intron (NM_001267043, intron 3 of 8)	L1PB2|LINE|L1	41843	NM_001267043	121536	Hs.126497	NM_001114176	ENSG00000139154	AEBP2	-	AE binding protein 2	protein-coding
chr12	12192820	12192989	Intergenic	Intergenic	-30974	NM_138723	79370	Hs.210343	NM_030766	ENSG00000121380	BCL2L14	BCLG	BCL2-like 14 (apoptosis facilitator)	protein-coding
chr12	116829002	116829171	Intergenic	MLT1J2|LTR|ERVL-MaLR	37037	NR_039683	100616309		NR_039683		MIR4472-2	-	microRNA 4472-2	miscRNA
chr12	96558293	96558462	Intergenic	(CA)n|Simple_repeat|Simple_repeat	-29830	NM_005230	2004	Hs.46523	NM_005230	ENSG00000111145	ELK3	ERP|NET|SAP2	ELK3, ETS-domain protein (SRF accessory protein 2)	protein-coding
chr12	6042267	6042436	intron (NM_020373, intron 1 of 25)	intron (NM_020373, intron 1 of 25)	13047	NM_020373	57101	Hs.148970	NM_020373	ENSG00000047617	ANO2	C12orf3|TMEM16B	anoctamin 2	protein-coding
chr12	49761622	49761791	intron (NM_023071, intron 1 of 13)	intron (NM_023071, intron 1 of 13)	1018	NM_023071	65244	Hs.654826	NM_023071	ENSG00000123352	SPATS2	P59SCR|SCR59|SPATA10	spermatogenesis associated, serine-rich 2	protein-coding
chr12	34428525	34428694	Intergenic	Intergenic	253393	NM_032834	84920	Hs.102971	NM_032834	ENSG00000139133	ALG10	DIE2|KCR1	asparagine-linked glycosylation 10, alpha-1,2-glucosyltransferase homolog (S. pombe)	protein-coding
chr12	67811435	67811604	Intergenic	Intergenic	148458	NM_018448	55832	Hs.546407	NM_018448	ENSG00000111530	CAND1	TIP120|TIP120A	cullin-associated and neddylation-dissociated 1	protein-coding
chr12	27214755	27214924	Intergenic	LTR16A|LTR|ERVL	20616	NM_001080406	728858	Hs.334003	NM_001080406	ENSG00000214700	C12orf71	-	chromosome 12 open reading frame 71	protein-coding
chr12	6955736	6955905	intron (NM_002075, intron 10 of 10)	(CA)n|Simple_repeat|Simple_repeat	4636	NM_031299	83461	Hs.524216	NM_031299	ENSG00000111665	CDCA3	GRCC8|TOME-1	cell division cycle associated 3	protein-coding
chr12	2791507	2791676	intron (NM_001129830, intron 43 of 47)	(TG)n|Simple_repeat|Simple_repeat	8732	NR_045725	100652846	Hs.683896	NR_045725		CACNA1C-AS1	-	CACNA1C antisense RNA 1	miscRNA
chr12	191666	191835	intron (NM_015232, intron 1 of 12)	intron (NM_015232, intron 1 of 12)	5208	NM_015232	440073	Hs.536319	NM_001170738	ENSG00000120645	IQSEC3	-	IQ motif and Sec7 domain 3	protein-coding
chr12	133112838	133113007	intron (NM_001142641, intron 4 of 16)	intron (NM_001142641, intron 4 of 16)	45765	NM_001142641	57666	Hs.656668	XM_003403652	ENSG00000112787	FBRSL1	-	fibrosin-like 1	protein-coding
chr12	45737119	45737288	intron (NM_001204803, intron 4 of 20)	intron (NM_001204803, intron 4 of 20)	50737	NM_001142678	196527	Hs.505339	NM_001025356	ENSG00000177119	ANO6	BDPLT7|SCTS|TMEM16F	anoctamin 6	protein-coding
chr12	7762827	7762996	Intergenic	L1PA13|LINE|L1	55591	NM_001644	339	Hs.560	NM_001644	ENSG00000111701	APOBEC1	APOBEC-1|BEDP|CDAR1|HEPR	apolipoprotein B mRNA editing enzyme, catalytic polypeptide 1	protein-coding
chr12	8013206	8013375	intron (NM_153449, intron 3 of 11)	intron (NM_153449, intron 3 of 11)	12205	NM_153449	144195	Hs.655169	NM_153449	ENSG00000173262	SLC2A14	GLUT14|SLC2A3P3	solute carrier family 2 (facilitated glucose transporter), member 14	protein-coding
chr12	25004881	25005050	intron (NM_001178091, intron 4 of 9)	MSTA|LTR|ERVL-MaLR	50357	NM_001178094	586	Hs.438993	NM_001178091	ENSG00000060982	BCAT1	BCATC|BCT1|ECA39|MECA39|PNAS121|PP18	branched chain amino-acid transaminase 1, cytosolic	protein-coding
chr12	9814680	9814849	Intergenic	LTR45B|LTR|ERV1	-7540	NM_001197319	29121	Hs.268326	NM_001004419	ENSG00000069493	CLEC2D	CLAX|LLT1|OCIL	C-type lectin domain family 2, member D	protein-coding
chr12	2042208	2042377	intron (NR_036546, intron 1 of 1)	(TG)n|Simple_repeat|Simple_repeat	3450	NR_036546	100271702	Hs.737031	NR_036546		LOC100271702	-	uncharacterized LOC100271702	miscRNA
chr12	20131200	20131369	Intergenic	Intergenic	-36335	NR_040098	100506393	Hs.658356	NR_040098		LOC100506393	-	uncharacterized LOC100506393	miscRNA
chr12	48221884	48222053	Intergenic	Intergenic	-8205	NM_015401	51564	Hs.200063	NM_001098416	ENSG00000061273	HDAC7	HD7A|HDAC7A	histone deacetylase 7	protein-coding
chr12	6498045	6498214	intron (NM_001270987, intron 8 of 9)	L2a|LINE|L2	4930	NM_002342	4055	Hs.591047	NM_001270987	ENSG00000111321	LTBR	CD18|D12S370|LT-BETA-R|TNF-R-III|TNFCR|TNFR-RP|TNFR2-RP|TNFR3|TNFRSF3	lymphotoxin beta receptor (TNFR superfamily, member 3)	protein-coding
chr12	7246555	7246724	TTS (NM_016546)	TTS (NM_016546)	-1596	NM_001733	715	Hs.524224	NM_001733	ENSG00000159403	C1R	-	complement component 1, r subcomponent	protein-coding
chr12	56365167	56365336	intron (NM_052827, intron 5 of 5)	intron (NM_052827, intron 5 of 5)	-2446	NM_001252036	5869	Hs.157659	NM_001252036	ENSG00000111540	RAB5B	-	RAB5B, member RAS oncogene family	protein-coding
chr12	13679137	13679306	Intergenic	Intergenic	-149542	NR_036555	283422	Hs.448717	NM_182558		C12orf36	-	chromosome 12 open reading frame 36	miscRNA
chr12	7376687	7376856	Intergenic	MLT1I|LTR|ERVL-MaLR	33813	NM_000319	5830	Hs.567327	NM_000319	ENSG00000139197	PEX5	PTS1-BP|PTS1R|PXR1	peroxisomal biogenesis factor 5	protein-coding
chr12	12111584	12111753	Intergenic	Intergenic	-32561	NR_046487	100873754		NR_046487		RNU6-19	-	RNA, U6 small nuclear 19	snRNA
chr12	32551874	32552043	Intergenic	Intergenic	-103083	NM_139241	121512	Hs.117835	NM_139241	ENSG00000139132	FGD4	CMT4H|FRABP|ZFYVE6	FYVE, RhoGEF and PH domain containing 4	protein-coding
chr12	22696269	22696438	intron (NM_014802, intron 2 of 24)	intron (NM_014802, intron 2 of 24)	1099	NM_014802	9847	Hs.271014	NM_014802	ENSG00000111731	KIAA0528	-	KIAA0528	protein-coding
chr12	33097240	33097409	Intergenic	Intergenic	-47544	NM_001005242	5318	Hs.164384	NM_001005242	ENSG00000057294	PKP2	ARVD9	plakophilin 2	protein-coding
chr12	27546583	27546752	intron (NM_020183, intron 9 of 16)	L2a|LINE|L2	60880	NM_001248002	56938	Hs.445447	NM_001248002	ENSG00000029153	ARNTL2	BMAL2|CLIF|MOP9|PASD9|bHLHe6	aryl hydrocarbon receptor nuclear translocator-like 2	protein-coding
chr12	13678659	13678828	Intergenic	Intergenic	-149064	NR_036555	283422	Hs.448717	NM_182558		C12orf36	-	chromosome 12 open reading frame 36	miscRNA
chr12	33097312	33097481	Intergenic	Intergenic	-47616	NM_001005242	5318	Hs.164384	NM_001005242	ENSG00000057294	PKP2	ARVD9	plakophilin 2	protein-coding
chr12	66050746	66050915	Intergenic	Intergenic	-167410	NM_003484	8091	Hs.505924	NM_003483	ENSG00000149948	HMGA2	BABL|HMGI-C|HMGIC|LIPO|STQTL9	high mobility group AT-hook 2	protein-coding
chr12	9492068	9492237	Intergenic	MER89-int|LTR|ERV1	55899	NR_024374	642846	Hs.447869	NR_024374		LOC642846	-	DEAD/H (Asp-Glu-Ala-Asp/His) box polypeptide 11-like	miscRNA
chr12	2688387	2688556	intron (NM_001129838, intron 13 of 45)	intron (NM_001129838, intron 13 of 45)	111852	NR_045725	100652846	Hs.683896	NR_045725		CACNA1C-AS1	-	CACNA1C antisense RNA 1	miscRNA
chr12	26453441	26453610	Intergenic	ERV3-16A3_LTR|LTR|ERVL	105019	NM_005086	8082	Hs.183428	NM_001135823	ENSG00000123096	SSPN	DAGA5|KRAG|NSPN|SPN1|SPN2	sarcospan	protein-coding
chr12	3093683	3093852	intron (NM_201443, intron 1 of 10)	Tigger3b|DNA|TcMar-Tigger	25019	NM_201443	7004	Hs.94865	NM_003213	ENSG00000197905	TEAD4	EFTR-2|RTEF1|TCF13L1|TEF-3|TEF3|TEFR-1|hRTEF-1B	TEA domain family member 4	protein-coding
chr12	30370572	30370741	Intergenic	Intergenic	-432964	NM_175861	83857	Hs.401954	NM_001193451	ENSG00000133687	TMTC1	OLF|TMTC1A	transmembrane and tetratricopeptide repeat containing 1	protein-coding
chr12	13679112	13679281	Intergenic	Intergenic	-149517	NR_036555	283422	Hs.448717	NM_182558		C12orf36	-	chromosome 12 open reading frame 36	miscRNA
chr12	54038068	54038237	Intergenic	ERVL-B4-int|LTR|ERVL	-17953	NM_001130060	11016	Hs.633602	NM_001130059	ENSG00000170653	ATF7	ATFA	activating transcription factor 7	protein-coding
chr12	22435264	22435433	intron (NM_003034, intron 2 of 4)	MLT1J1|LTR|ERVL-MaLR	52300	NM_003034	6489	Hs.408614	NM_003034	ENSG00000111728	ST8SIA1	GD3S|SIAT8|SIAT8-A|SIAT8A|ST8SiaI	ST8 alpha-N-acetyl-neuraminide alpha-2,8-sialyltransferase 1	protein-coding
chr12	20131134	20131303	Intergenic	Intergenic	-36401	NR_040098	100506393	Hs.658356	NR_040098		LOC100506393	-	uncharacterized LOC100506393	miscRNA
chr12	18645759	18645928	intron (NM_004570, intron 19 of 31)	intron (NM_004570, intron 19 of 31)	231369	NM_004570	5288	Hs.22500	NM_004570	ENSG00000139144	PIK3C2G	PI3K-C2GAMMA	phosphatidylinositol-4-phosphate 3-kinase, catalytic subunit type 2 gamma	protein-coding
chr12	5420379	5420548	Intergenic	LTR79|LTR|ERVL	-120817	NM_001102654	4908	Hs.99171	NM_001102654	ENSG00000185652	NTF3	HDNF|NGF-2|NGF2|NT3	neurotrophin 3	protein-coding
chr12	12976863	12977032	exon (NM_016355, exon 8 of 12)	exon (NM_016355, exon 8 of 12)	10667	NM_201224	51202	Hs.719938	NM_016355	ENSG00000213782	DDX47	E4-DBP|HQ0256|MSTP162|RRP3	DEAD (Asp-Glu-Ala-Asp) box polypeptide 47	protein-coding
chr12	131213037	131213206	Intergenic	(CA)n|Simple_repeat|Simple_repeat	110698	NM_194356	2054	Hs.437585	NM_194356	ENSG00000111450	STX2	EPIM|EPM|STX2A|STX2B|STX2C	syntaxin 2	protein-coding
chr12	8636098	8636267	Intergenic	Intergenic	27591	NM_001007033	93978	Hs.591147	NM_001007033	ENSG00000205846	CLEC6A	CLEC4N|CLECSF10	C-type lectin domain family 6, member A	protein-coding
chr12	13129427	13129596	intron (NM_015987, intron 3 of 3)	intron (NM_015987, intron 3 of 3)	-3260	NR_038920	100506314	Hs.659383	NR_038920		LOC100506314	-	uncharacterized LOC100506314	miscRNA
chr12	7476770	7476939	intron (NM_001080454, intron 9 of 12)	intron (NM_001080454, intron 9 of 12)	19926	NM_001080454	341392	Hs.450804	NM_001080454	ENSG00000215009	ACSM4	-	acyl-CoA synthetase medium-chain family member 4	protein-coding
chr12	1046907	1047076	intron (NM_134424, intron 1 of 11)	LTR16C|LTR|ERVL	11872	NM_134424	5893	Hs.410355	NM_134424	ENSG00000002016	RAD52	-	RAD52 homolog (S. cerevisiae)	protein-coding
chr12	112724751	112724920	intron (NM_001109662, intron 7 of 75)	MER81|DNA|hAT-Blackjack	95061	NM_001109662	283450	Hs.530943	NM_173813	ENSG00000173064	HECTD4	C12orf51	HECT domain containing E3 ubiquitin protein ligase 4	protein-coding
chr12	31876523	31876692	intron (NR_004854, intron 1 of 6)	HERVL40-int|LTR|ERVL	5501	NM_001113402	196394	Hs.740628	NM_001113402	ENSG00000151743	AMN1	-	antagonist of mitotic exit network 1 homolog (S. cerevisiae)	protein-coding
chr12	15904674	15904843	intron (NM_004447, intron 1 of 20)	intron (NM_004447, intron 1 of 20)	37752	NM_004447	2059	Hs.591160	NM_004447	ENSG00000151491	EPS8	-	epidermal growth factor receptor pathway substrate 8	protein-coding
chr12	133113336	133113505	intron (NM_001142641, intron 4 of 16)	(TG)n|Simple_repeat|Simple_repeat	46263	NM_001142641	57666	Hs.656668	XM_003403652	ENSG00000112787	FBRSL1	-	fibrosin-like 1	protein-coding
chr12	13906148	13906317	intron (NM_000834, intron 3 of 12)	intron (NM_000834, intron 3 of 12)	226790	NM_000834	2904	Hs.654430	NM_000834	ENSG00000150086	GRIN2B	GluN2B|MRD6|NMDAR2B|NR2B|hNR3	glutamate receptor, ionotropic, N-methyl D-aspartate 2B	protein-coding
chr12	164468	164637	Intergenic	Intergenic	-11497	NM_001170738	440073	Hs.536319	NM_001170738	ENSG00000120645	IQSEC3	-	IQ motif and Sec7 domain 3	protein-coding
chr12	15573335	15573504	intron (NM_002848, intron 1 of 25)	intron (NM_002848, intron 1 of 25)	98228	NM_002848	5800	Hs.160871	NM_002848	ENSG00000151490	PTPRO	GLEPP1|NPHS6|PTP-OC|PTP-U2|PTPROT|PTPU2|R-PTP-O	protein tyrosine phosphatase, receptor type, O	protein-coding
chr12	112534543	112534712	intron (NM_024953, intron 1 of 23)	intron (NM_024953, intron 1 of 23)	12008	NM_024953	80018	Hs.530941	NM_024953	ENSG00000111300	NAA25	C12orf30|MDM20|NAP1	N(alpha)-acetyltransferase 25, NatB auxiliary subunit	protein-coding
chr12	34389092	34389261	Intergenic	HAL1-2a_MD|LINE|L1	213960	NM_032834	84920	Hs.102971	NM_032834	ENSG00000139133	ALG10	DIE2|KCR1	asparagine-linked glycosylation 10, alpha-1,2-glucosyltransferase homolog (S. pombe)	protein-coding
chr12	30941075	30941244	Intergenic	MER87|LTR|ERV1	-7456	NR_040245	100287314	Hs.355210	NR_040245		LOC100287314	-	uncharacterized LOC100287314	miscRNA
chr12	56511698	56511867	promoter-TSS (NM_032786)	promoter-TSS (NM_032786)	-248	NM_032786	84872	Hs.632706	NM_032786	ENSG00000135482	ZC3H10	ZC3HDC10	zinc finger CCCH-type containing 10	protein-coding
chr12	106407365	106407534	Intergenic	LTR78B|LTR|ERV1	126362	NM_014840	9891	Hs.740457	NM_014840	ENSG00000074590	NUAK1	ARK5	NUAK family, SNF1-like kinase, 1	protein-coding
chr12	12716762	12716931	Intergenic	Intergenic	-1398	NM_030640	80824	Hs.536535	NM_030640	ENSG00000111266	DUSP16	MKP-7|MKP7	dual specificity phosphatase 16	protein-coding
chr12	30947064	30947233	Intergenic	Intergenic	-1467	NR_040245	100287314	Hs.355210	NR_040245		LOC100287314	-	uncharacterized LOC100287314	miscRNA
chr12	15204641	15204810	Intergenic	Intergenic	78769	NM_006205	5149	Hs.54471	NM_006205	ENSG00000139053	PDE6H	RCD3	phosphodiesterase 6H, cGMP-specific, cone, gamma	protein-coding
chr12	56435743	56435912	5' UTR (NM_001029, exon 1 of 4)	5' UTR (NM_001029, exon 1 of 4)	141	NM_001029	6231	Hs.711461	NM_001029	ENSG00000197728	RPS26	DBA10|S26	ribosomal protein S26	protein-coding
chr12	116813122	116813291	Intergenic	(TG)n|Simple_repeat|Simple_repeat	52917	NR_039683	100616309		NR_039683		MIR4472-2	-	microRNA 4472-2	miscRNA
chr12	125943359	125943528	intron (NM_052907, intron 3 of 8)	intron (NM_052907, intron 3 of 8)	132281	NM_052907	114795	Hs.524838	NM_052907	ENSG00000139364	TMEM132B	-	transmembrane protein 132B	protein-coding
chr12	28861768	28861937	Intergenic	Intergenic	451719	NM_018318	55297	Hs.653125	NM_018318	ENSG00000123106	CCDC91	p56	coiled-coil domain containing 91	protein-coding
chr12	6443163	6443332	intron (NM_001065, intron 2 of 9)	intron (NM_001065, intron 2 of 9)	8036	NM_001065	7132	Hs.279594	NM_001065	ENSG00000067182	TNFRSF1A	CD120a|FPF|MS5|TBP1|TNF-R|TNF-R-I|TNF-R55|TNFAR|TNFR1|TNFR1-d2|TNFR55|TNFR60|p55|p55-R|p60	tumor necrosis factor receptor superfamily, member 1A	protein-coding
chr12	25090793	25090962	intron (NM_001178091, intron 1 of 9)	L2b|LINE|L2	11516	NM_001178091	586	Hs.438993	NM_001178091	ENSG00000060982	BCAT1	BCATC|BCT1|ECA39|MECA39|PNAS121|PP18	branched chain amino-acid transaminase 1, cytosolic	protein-coding
chr12	15844453	15844622	intron (NM_004447, intron 1 of 20)	intron (NM_004447, intron 1 of 20)	97973	NM_004447	2059	Hs.591160	NM_004447	ENSG00000151491	EPS8	-	epidermal growth factor receptor pathway substrate 8	protein-coding
chr12	87106230	87106399	intron (NM_013244, intron 1 of 6)	intron (NM_013244, intron 1 of 6)	126367	NM_013244	25834	Hs.589093	NM_013244	ENSG00000182050	MGAT4C	GNTIVH|HGNT-IV-H	mannosyl (alpha-1,3-)-glycoprotein beta-1,4-N-acetylglucosaminyltransferase, isozyme C (putative)	protein-coding
chr12	14989922	14990091	intron (NM_021071, intron 2 of 2)	Tigger7|DNA|TcMar-Tigger	6407	NM_021071	420	Hs.668803	NM_021071	ENSG00000111339	ART4	ARTC4|CD297|DO|DOK1	ADP-ribosyltransferase 4 (Dombrock blood group)	protein-coding
chr12	117237492	117237661	intron (NM_001109903, intron 7 of 11)	intron (NM_001109903, intron 7 of 11)	61480	NM_001109903	84900	Hs.437195	NM_001109903	ENSG00000135119	RNFT2	TMEM118	ring finger protein, transmembrane 2	protein-coding
chr12	66050805	66050974	Intergenic	Intergenic	-167351	NM_003484	8091	Hs.505924	NM_003483	ENSG00000149948	HMGA2	BABL|HMGI-C|HMGIC|LIPO|STQTL9	high mobility group AT-hook 2	protein-coding
chr12	7355130	7355299	exon (NM_001131024, exon 8 of 15)	exon (NM_001131024, exon 8 of 15)	12256	NM_000319	5830	Hs.567327	NM_000319	ENSG00000139197	PEX5	PTS1-BP|PTS1R|PXR1	peroxisomal biogenesis factor 5	protein-coding
chr12	47671836	47672005	Intergenic	Intergenic	-61694	NR_026544	100233209	Hs.657722	NR_026544		PCED1B-AS1	-	PCED1B antisense RNA 1	miscRNA
chr12	7373052	7373221	Intergenic	ERVL-E-int|LTR|ERVL	30178	NM_000319	5830	Hs.567327	NM_000319	ENSG00000139197	PEX5	PTS1-BP|PTS1R|PXR1	peroxisomal biogenesis factor 5	protein-coding
chr12	6655248	6655417	intron (NM_080730, intron 8 of 9)	MER44C|DNA|TcMar-Tigger	9917	NM_080730	25900	Hs.15243	NM_001039670	ENSG00000010295	IFFO1	HOM-TES-103|IFFO	intermediate filament family orphan 1	protein-coding
chr12	53196159	53196328	Intergenic	L2c|LINE|L2	-6351	NM_057088	3850	Hs.680652	NM_057088	ENSG00000186442	KRT3	CK3|K3	keratin 3	protein-coding
chr12	115341775	115341944	Intergenic	Intergenic	-219890	NM_005996	6926	Hs.129895	NM_005996	ENSG00000135111	TBX3	TBX3-ISO|UMS|XHL	T-box 3	protein-coding
chr12	22256365	22256534	Intergenic	L1PREC2|LINE|L1	57339	NM_018686	55907	Hs.311346	NM_018686	ENSG00000111726	CMAS	CSS	cytidine monophosphate N-acetylneuraminic acid synthetase	protein-coding
chr12	29896822	29896991	intron (NM_175861, intron 5 of 17)	intron (NM_175861, intron 5 of 17)	39837	NM_001193451	83857	Hs.401954	NM_001193451	ENSG00000133687	TMTC1	OLF|TMTC1A	transmembrane and tetratricopeptide repeat containing 1	protein-coding
chr12	13325488	13325657	Intergenic	MER5A1|DNA|hAT-Charlie	-24030	NM_001423	2012	Hs.719042	NM_001423	ENSG00000134531	EMP1	CL-20|EMP-1|TMP	epithelial membrane protein 1	protein-coding
chr12	11660199	11660368	Intergenic	(CA)n|Simple_repeat|Simple_repeat	-40681	NR_033890	338817	Hs.733066	NR_033890		LOC338817	-	uncharacterized LOC338817	miscRNA
chr12	32204480	32204649	Intergenic	Tigger3c|DNA|TcMar-Tigger	-55621	NM_001003398	636	Hs.505202	NM_001003398	ENSG00000151746	BICD1	BICD	bicaudal D homolog 1 (Drosophila)	protein-coding
chr12	4676832	4677001	Intergenic	Intergenic	-22328	NM_003845	8798	Hs.439530	NM_003845	ENSG00000010219	DYRK4	-	dual-specificity tyrosine-(Y)-phosphorylation regulated kinase 4	protein-coding
chr12	47308968	47309137	Intergenic	Intergenic	-89272	NM_018018	55089	Hs.446077	NM_001143824	ENSG00000139209	SLC38A4	ATA3|NAT3|PAAT	solute carrier family 38, member 4	protein-coding
chr12	210961	211130	intron (NM_015232, intron 2 of 12)	intron (NM_015232, intron 2 of 12)	24503	NM_015232	440073	Hs.536319	NM_001170738	ENSG00000120645	IQSEC3	-	IQ motif and Sec7 domain 3	protein-coding
chr12	27509150	27509319	intron (NM_001248003, intron 1 of 14)	intron (NM_001248003, intron 1 of 14)	23447	NM_001248002	56938	Hs.445447	NM_001248002	ENSG00000029153	ARNTL2	BMAL2|CLIF|MOP9|PASD9|bHLHe6	aryl hydrocarbon receptor nuclear translocator-like 2	protein-coding
chr12	54623544	54623713	Intergenic	Intergenic	1632	NR_039851	100616400		NR_039851		MIR3198-2	-	microRNA 3198-2	miscRNA
chr12	116817435	116817604	Intergenic	Intergenic	48604	NR_039683	100616309		NR_039683		MIR4472-2	-	microRNA 4472-2	miscRNA
chr12	7142291	7142460	Intergenic	ERVL-B4-int|LTR|ERVL	-16533	NM_005768	10162	Hs.655248	NM_005768	ENSG00000111684	LPCAT3	C3F|LPCAT|LPLAT 5|LPSAT|MBOAT5|OACT5|nessy	lysophosphatidylcholine acyltransferase 3	protein-coding
chr12	52302731	52302900	intron (NM_000020, intron 1 of 9)	intron (NM_000020, intron 1 of 9)	1613	NM_000020	94	Hs.591026	NM_000020	ENSG00000139567	ACVRL1	ACVRLK1|ALK-1|ALK1|HHT|HHT2|ORW2|SKR3|TSR-I	activin A receptor type II-like 1	protein-coding
chr12	17660524	17660693	Intergenic	MER70B|LTR|ERVL	-165625	NR_039770	100616279		NR_039770		MIR3974	-	microRNA 3974	miscRNA
chr12	56601293	56601462	intron (NR_040053, intron 7 of 8)	intron (NR_040053, intron 7 of 8)	14108	NM_001242826	10193	Hs.524502	NM_001242826	ENSG00000181852	RNF41	FLRF|NRDP1	ring finger protein 41	protein-coding
chr12	96654512	96654681	intron (NM_005230, intron 4 of 4)	intron (NM_005230, intron 4 of 4)	66389	NM_005230	2004	Hs.46523	NM_005230	ENSG00000111145	ELK3	ERP|NET|SAP2	ELK3, ETS-domain protein (SRF accessory protein 2)	protein-coding
chr12	115342498	115342667	Intergenic	(TG)n|Simple_repeat|Simple_repeat	-220613	NM_005996	6926	Hs.129895	NM_005996	ENSG00000135111	TBX3	TBX3-ISO|UMS|XHL	T-box 3	protein-coding
chr12	12006663	12006832	intron (NM_001987, intron 4 of 7)	intron (NM_001987, intron 4 of 7)	72360	NR_046487	100873754		NR_046487		RNU6-19	-	RNA, U6 small nuclear 19	snRNA
chr12	45809140	45809309	intron (NM_001204803, intron 17 of 20)	MER102c|DNA|hAT-Charlie	122758	NM_001142678	196527	Hs.505339	NM_001025356	ENSG00000177119	ANO6	BDPLT7|SCTS|TMEM16F	anoctamin 6	protein-coding
chr12	117699205	117699374	intron (NM_000620, intron 13 of 28)	intron (NM_000620, intron 13 of 28)	43568	NM_001204213	4842	Hs.735734	NM_000620	ENSG00000089250	NOS1	IHPS1|N-NOS|NC-NOS|NOS|bNOS|nNOS	nitric oxide synthase 1 (neuronal)	protein-coding
chr12	14010708	14010877	intron (NM_000834, intron 2 of 12)	intron (NM_000834, intron 2 of 12)	122230	NM_000834	2904	Hs.654430	NM_000834	ENSG00000150086	GRIN2B	GluN2B|MRD6|NMDAR2B|NR2B|hNR3	glutamate receptor, ionotropic, N-methyl D-aspartate 2B	protein-coding
chr12	56510397	56510566	5' UTR (NM_001035267, exon 1 of 3)	5' UTR (NM_001035267, exon 1 of 3)	107	NM_021104	6171	Hs.660053	NM_001035267	ENSG00000229117	RPL41	L41	ribosomal protein L41	protein-coding
chr12	377240	377409	Intergenic	Intergenic	-5285	NM_016615	6540	Hs.733878	NM_001190997	ENSG00000010379	SLC6A13	GAT-2|GAT2	solute carrier family 6 (neurotransmitter transporter, GABA), member 13	protein-coding
chr12	27961411	27961580	Intergenic	Intergenic	28308	NM_020782	57542	Hs.505104	NM_020782	ENSG00000087448	KLHDC5	Ctb9	kelch domain containing 5	protein-coding
chr12	1732722	1732891	intron (NM_030775, intron 1 of 4)	intron (NM_030775, intron 1 of 4)	-5606	NM_032642	81029	Hs.306051	NM_030775	ENSG00000111186	WNT5B	-	wingless-type MMTV integration site family, member 5B	protein-coding
chr12	31662869	31663038	intron (NM_144973, intron 1 of 20)	intron (NM_144973, intron 1 of 20)	-79904	NR_046909	100874249	Hs.627628	NR_046909		DENND5B-AS1	-	DENND5B antisense RNA 1	miscRNA
chr12	15061262	15061431	Intergenic	Intergenic	-22493	NM_001190839	4256	Hs.365706	NM_000900	ENSG00000111341	MGP	MGLAP|NTI	matrix Gla protein	protein-coding
chr12	123574672	123574841	intron (NM_020845, intron 1 of 24)	MLT1F|LTR|ERVL-MaLR	8825	NR_038290	100507091	Hs.683912	NR_038290		LOC100507091	-	uncharacterized LOC100507091	miscRNA
chr12	2143421	2143590	Intergenic	L3|LINE|CR1	-18911	NM_001129831	775	Hs.118262	NM_000719	ENSG00000151067	CACNA1C	CACH2|CACN2|CACNL1A1|CCHL1A1|CaV1.2|LQT8|TS	calcium channel, voltage-dependent, L type, alpha 1C subunit	protein-coding
chr12	2238303	2238472	intron (NM_001129838, intron 3 of 45)	intron (NM_001129838, intron 3 of 45)	75971	NM_001129834	775	Hs.118262	NM_000719	ENSG00000151067	CACNA1C	CACH2|CACN2|CACNL1A1|CCHL1A1|CaV1.2|LQT8|TS	calcium channel, voltage-dependent, L type, alpha 1C subunit	protein-coding
chr12	4558680	4558849	Intergenic	Intergenic	-3984	NM_020996	2251	Hs.166015	NM_020996	ENSG00000111241	FGF6	HBGF-6|HST2	fibroblast growth factor 6	protein-coding
chr12	4067471	4067640	Intergenic	Intergenic	-84947	NM_020367	57097	Hs.657268	NM_020367	ENSG00000111224	PARP11	ARTD11|C12orf6	poly (ADP-ribose) polymerase family, member 11	protein-coding
chr12	803900	804069	Intergenic	LTR49-int|LTR|ERV1	-31229	NM_016533	4815	Hs.656450	NM_016533	ENSG00000171840	NINJ2	-	ninjurin 2	protein-coding
chr12	27604527	27604696	Intergenic	MER82|DNA|TcMar-Tigger	-15132	NM_001145010	341346	Hs.282121	NM_001145010	ENSG00000165935	C12orf70	-	chromosome 12 open reading frame 70	protein-coding
chr12	2025202	2025371	intron (NM_172364, intron 1 of 37)	L2c|LINE|L2	2584	NM_172364	93589	Hs.13768	NM_172364	ENSG00000151062	CACNA2D4	RCD4	calcium channel, voltage-dependent, alpha 2/delta subunit 4	protein-coding
chr12	3715977	3716146	Intergenic	Intergenic	115697	NM_019854	56341	Hs.504530	NM_001256537	ENSG00000111218	PRMT8	HRMT1L3|HRMT1L4	protein arginine methyltransferase 8	protein-coding
chr12	4386413	4386582	intron (NM_001759, intron 2 of 4)	intron (NM_001759, intron 2 of 4)	3595	NM_001759	894	Hs.376071	NM_001759	ENSG00000118971	CCND2	KIAK0002	cyclin D2	protein-coding
chr12	861029	861198	promoter-TSS (NM_213655)	promoter-TSS (NM_213655)	-976	NM_001184985	65125	Hs.356604	NM_001184985	ENSG00000060237	WNK1	HSAN2|HSN2|KDP|PRKWNK1|PSK|p65	WNK lysine deficient protein kinase 1	protein-coding
chr12	26427698	26427867	Intergenic	Intergenic	79276	NM_005086	8082	Hs.183428	NM_001135823	ENSG00000123096	SSPN	DAGA5|KRAG|NSPN|SPN1|SPN2	sarcospan	protein-coding
chr12	53192490	53192659	Intergenic	Intergenic	-2682	NM_057088	3850	Hs.680652	NM_057088	ENSG00000186442	KRT3	CK3|K3	keratin 3	protein-coding
chr12	7013071	7013240	promoter-TSS (NM_001135217)	promoter-TSS (NM_001135217)	-742	NM_001135217	10233	Hs.661103	NM_001135217	ENSG00000010626	LRRC23	LRPB7	leucine rich repeat containing 23	protein-coding
chr12	4321947	4322116	Intergenic	ERV3-16A3_LTR|LTR|ERVL	-60871	NM_001759	894	Hs.376071	NM_001759	ENSG00000118971	CCND2	KIAK0002	cyclin D2	protein-coding
chr12	12937118	12937287	intron (NM_001130415, intron 1 of 1)	intron (NM_001130415, intron 1 of 1)	-1339	NM_030817	81575	Hs.719938	NM_001130415	ENSG00000178878	APOLD1	VERGE	apolipoprotein L domain containing 1	protein-coding
chr12	6977637	6977806	intron (NM_001258026, intron 1 of 6)	intron (NM_001258026, intron 1 of 6)	443	NM_001258026	7167	Hs.524219	NM_000365	ENSG00000111669	TPI1	TIM|TPI	triosephosphate isomerase 1	protein-coding
chr12	10071688	10071857	intron (NM_001130711, intron 3 of 4)	L1PA12|LINE|L1	13208	NM_001130711	387836	Hs.527665	NM_001130711	ENSG00000188393	CLEC2A	KACL|PILAR|UNQ5792	C-type lectin domain family 2, member A	protein-coding
chr12	14340394	14340563	Intergenic	MER31A|LTR|ERV1	-178133	NM_018179	55729	Hs.591151	NM_018179	ENSG00000171681	ATF7IP	AM|MCAF|MCAF1|p621	activating transcription factor 7 interacting protein	protein-coding
chr12	18964408	18964577	Intergenic	MLT1H2|LTR|ERVL-MaLR	73447	NM_033328	93661	Hs.131288	NM_033328	ENSG00000177938	CAPZA3	CAPPA3|Gsg3	capping protein (actin filament) muscle Z-line, alpha 3	protein-coding
chr12	15894300	15894469	intron (NM_004447, intron 1 of 20)	MER45C|DNA|hAT-Tip100	48126	NM_004447	2059	Hs.591160	NM_004447	ENSG00000151491	EPS8	-	epidermal growth factor receptor pathway substrate 8	protein-coding
chr12	56080416	56080585	intron (NM_002206, intron 24 of 24)	intron (NM_002206, intron 24 of 24)	5170	NM_152637	196410	Hs.51483	NM_152637	ENSG00000170439	METTL7B	ALDI	methyltransferase like 7B	protein-coding
chr12	4256556	4256725	Intergenic	MIRc|SINE|MIR	-126262	NM_001759	894	Hs.376071	NM_001759	ENSG00000118971	CCND2	KIAK0002	cyclin D2	protein-coding
chr12	31680082	31680251	intron (NM_144973, intron 1 of 20)	L2a|LINE|L2	-62691	NR_046909	100874249	Hs.627628	NR_046909		DENND5B-AS1	-	DENND5B antisense RNA 1	miscRNA
chr12	4078239	4078408	Intergenic	Intergenic	-95715	NM_020367	57097	Hs.657268	NM_020367	ENSG00000111224	PARP11	ARTD11|C12orf6	poly (ADP-ribose) polymerase family, member 11	protein-coding
chr12	63792761	63792930	Intergenic	HERVL18-int|LTR|ERVL	-246255	NM_000706	552	Hs.2131	NM_000706	ENSG00000166148	AVPR1A	AVPR V1a|AVPR1|V1aR	arginine vasopressin receptor 1A	protein-coding
chr12	5380122	5380291	Intergenic	Intergenic	-161074	NM_001102654	4908	Hs.99171	NM_001102654	ENSG00000185652	NTF3	HDNF|NGF-2|NGF2|NT3	neurotrophin 3	protein-coding
chr12	116355389	116355558	Intergenic	L2c|LINE|L2	230986	NR_030351	693205		NR_030351		MIR620	MIRN620|hsa-mir-620	microRNA 620	miscRNA
chr12	2237970	2238139	intron (NM_001129838, intron 3 of 45)	MIR|SINE|MIR	75638	NM_001129834	775	Hs.118262	NM_000719	ENSG00000151067	CACNA1C	CACH2|CACN2|CACNL1A1|CCHL1A1|CaV1.2|LQT8|TS	calcium channel, voltage-dependent, L type, alpha 1C subunit	protein-coding
chr12	31812596	31812765	promoter-TSS (NM_001135863)	promoter-TSS (NM_001135863)	71	NM_001135863	254013	Hs.740628	NM_001135863	ENSG00000139160	METTL20	C12orf72	methyltransferase like 20	protein-coding
chr12	96534822	96534991	Intergenic	L2a|LINE|L2	-53301	NM_005230	2004	Hs.46523	NM_005230	ENSG00000111145	ELK3	ERP|NET|SAP2	ELK3, ETS-domain protein (SRF accessory protein 2)	protein-coding
chr12	29703566	29703735	intron (NM_175861, intron 10 of 17)	intron (NM_175861, intron 10 of 17)	-53031	NM_183378	341350	Hs.674588	NM_183378	ENSG00000187950	OVCH1	OVCH	ovochymase 1	protein-coding
chr12	6013429	6013598	intron (NM_020373, intron 3 of 25)	intron (NM_020373, intron 3 of 25)	41885	NM_020373	57101	Hs.148970	NM_020373	ENSG00000047617	ANO2	C12orf3|TMEM16B	anoctamin 2	protein-coding
chr12	3289002	3289171	intron (NM_006675, intron 2 of 8)	intron (NM_006675, intron 2 of 8)	102565	NM_006675	10867	Hs.504517	NM_001168320	ENSG00000011105	TSPAN9	NET-5|NET5|PP1057	tetraspanin 9	protein-coding
chr12	23217398	23217567	Intergenic	L2a|LINE|L2	439406	NM_001039481	55500	Hs.29464	NM_001039481	ENSG00000139163	ETNK1	EKI|EKI 1|EKI1|Nbla10396	ethanolamine kinase 1	protein-coding
chr12	3531253	3531422	intron (NM_001256536, intron 1 of 9)	intron (NM_001256536, intron 1 of 9)	40822	NM_001256536	56341	Hs.504530	NM_001256537	ENSG00000111218	PRMT8	HRMT1L3|HRMT1L4	protein arginine methyltransferase 8	protein-coding
chr12	52625366	52625535	Intergenic	Intergenic	-1504	NM_005556	3855	Hs.735629	NM_005556	ENSG00000135480	KRT7	CK7|K2C7|K7|SCL	keratin 7	protein-coding
chr12	112251090	112251259	Intergenic	Intergenic	-29105	NM_003668	8550	Hs.413901	NM_003668	ENSG00000089022	MAPKAPK5	MAPKAP-K5|MK-5|MK5|PRAK	mitogen-activated protein kinase-activated protein kinase 5	protein-coding
chr12	2737441	2737610	intron (NM_001129838, intron 29 of 45)	intron (NM_001129838, intron 29 of 45)	62798	NR_045725	100652846	Hs.683896	NR_045725		CACNA1C-AS1	-	CACNA1C antisense RNA 1	miscRNA
chr12	28176518	28176687	Intergenic	MLT1F2|LTR|ERVL-MaLR	-51686	NM_198965	5744	Hs.591159	NM_002820	ENSG00000087494	PTHLH	BDE2|HHM|PLP|PTHR|PTHRP	parathyroid hormone-like hormone	protein-coding
chr12	7073681	7073850	TTS (NM_001267700)	TTS (NM_001267700)	505	NR_029682	406933		NR_029682		MIR141	MIRN141	microRNA 141	miscRNA
chr12	2666784	2666953	intron (NM_001129838, intron 11 of 45)	intron (NM_001129838, intron 11 of 45)	133455	NR_045725	100652846	Hs.683896	NR_045725		CACNA1C-AS1	-	CACNA1C antisense RNA 1	miscRNA
chr12	1729274	1729443	intron (NM_030775, intron 1 of 4)	L1ME3B|LINE|L1	3136	NM_030775	81029	Hs.306051	NM_030775	ENSG00000111186	WNT5B	-	wingless-type MMTV integration site family, member 5B	protein-coding
chr12	113673391	113673560	intron (NM_001143819, intron 3 of 28)	intron (NM_001143819, intron 3 of 28)	14215	NM_001143819	53373	Hs.524763	NM_001143819	ENSG00000186815	TPCN1	TPC1	two pore segment channel 1	protein-coding
chr12	19375981	19376150	intron (NM_001256787, intron 1 of 25)	Kanga1b|DNA|TcMar-Tc2	17806	NM_001256787	54477	Hs.188614	NM_001143821	ENSG00000052126	PLEKHA5	PEPP-2|PEPP2	pleckstrin homology domain containing, family A member 5	protein-coding
chr12	342831	343000	intron (NM_001190997, intron 5 of 12)	intron (NM_001190997, intron 5 of 12)	-19544	NM_001122848	6539	Hs.737267	NM_001122847	ENSG00000111181	SLC6A12	BGT-1|BGT1|GAT2	solute carrier family 6 (neurotransmitter transporter, betaine/GABA), member 12	protein-coding
chr12	6149104	6149273	intron (NM_000552, intron 18 of 51)	MIR3|SINE|MIR	84648	NM_000552	7450	Hs.440848	NM_000552	ENSG00000110799	VWF	F8VWF|VWD	von Willebrand factor	protein-coding
chr12	14198739	14198908	Intergenic	Intergenic	-65801	NM_000834	2904	Hs.654430	NM_000834	ENSG00000150086	GRIN2B	GluN2B|MRD6|NMDAR2B|NR2B|hNR3	glutamate receptor, ionotropic, N-methyl D-aspartate 2B	protein-coding
chr12	14806063	14806232	intron (NM_004963, intron 12 of 26)	intron (NM_004963, intron 12 of 26)	43372	NM_004963	2984	Hs.524278	NM_004963	ENSG00000070019	GUCY2C	DIAR6|GUC2C|MUCIL|STAR	guanylate cyclase 2C (heat stable enterotoxin receptor)	protein-coding
chr12	1714343	1714512	Intergenic	Intergenic	-11096	NM_152441	144699	Hs.367956	NM_152441	ENSG00000171823	FBXL14	Fbl14	F-box and leucine-rich repeat protein 14	protein-coding
chr12	32393427	32393596	intron (NM_001003398, intron 2 of 8)	MLT1D|LTR|ERVL-MaLR	133326	NM_001714	636	Hs.505202	NM_001003398	ENSG00000151746	BICD1	BICD	bicaudal D homolog 1 (Drosophila)	protein-coding
chr12	15754297	15754466	Intergenic	Intergenic	55103	NM_030668	5800	Hs.160871	NM_002848	ENSG00000151490	PTPRO	GLEPP1|NPHS6|PTP-OC|PTP-U2|PTPROT|PTPU2|R-PTP-O	protein tyrosine phosphatase, receptor type, O	protein-coding
chr12	1104291	1104460	intron (NR_027948, intron 1 of 19)	AluJb|SINE|Alu	3971	NR_027946	23085	Hs.601216	NM_178039	ENSG00000082805	ERC1	Cast2|ELKS|RAB6IP2	ELKS/RAB6-interacting/CAST family member 1	protein-coding
chr12	13294615	13294784	Intergenic	Intergenic	-38069	NM_001206842	83445	Hs.240053	NM_001080554	ENSG00000111305	GSG1	-	germ cell associated 1	protein-coding
chr12	11872179	11872348	intron (NM_001987, intron 1 of 7)	intron (NM_001987, intron 1 of 7)	69475	NM_001987	2120	Hs.504765	NM_001987	ENSG00000139083	ETV6	TEL|TEL/ABL	ets variant 6	protein-coding
chr12	32044242	32044411	Intergenic	Intergenic	-68027	NM_018169	55196	Hs.445129	NM_018169	ENSG00000174718	KIAA1551	C12orf35	KIAA1551	protein-coding
chr12	6783269	6783438	intron (NM_001039920, intron 5 of 8)	intron (NM_001039920, intron 5 of 8)	-11045	NM_001127586	51147	Hs.524210	NM_001127582	ENSG00000111653	ING4	my036|p29ING4	inhibitor of growth family, member 4	protein-coding
chr12	128181733	128181902	Intergenic	(ATGGTG)n|Simple_repeat|Simple_repeat	-184345	NR_033987	400087	Hs.524846	NR_033987		FLJ37505	-	uncharacterized LOC400087	miscRNA
chr12	25167617	25167786	Intergenic	Intergenic	-17328	NM_001101339	196415	Hs.434453	NM_001101339	ENSG00000226397	C12orf77	-	chromosome 12 open reading frame 77	protein-coding
chr12	2785649	2785818	non-coding (NR_045725, exon 4 of 4)	non-coding (NR_045725, exon 4 of 4)	14590	NR_045725	100652846	Hs.683896	NR_045725		CACNA1C-AS1	-	CACNA1C antisense RNA 1	miscRNA
chr12	25993909	25994078	Intergenic	MLT1L|LTR|ERVL-MaLR	33019	NR_036188	100422897		NR_036188		MIR4302	-	microRNA 4302	miscRNA
chr12	10533084	10533253	intron (NM_001199805, intron 8 of 12)	L1M2b|LINE|L1	9485	NM_007360	22914	Hs.387787	NM_007360	ENSG00000213809	KLRK1	CD314|D12S2489E|KLR|NKG2-D|NKG2D	killer cell lectin-like receptor subfamily K, member 1	protein-coding
chr12	49462807	49462976	intron (NM_144593, intron 1 of 7)	intron (NM_144593, intron 1 of 7)	884	NM_144593	121268	Hs.159013	NM_144593	ENSG00000167550	RHEBL1	RHEBL1c	Ras homolog enriched in brain like 1	protein-coding
chr12	30167542	30167711	Intergenic	Intergenic	-229934	NM_175861	83857	Hs.401954	NM_001193451	ENSG00000133687	TMTC1	OLF|TMTC1A	transmembrane and tetratricopeptide repeat containing 1	protein-coding
chr12	7585143	7585312	exon (NM_174941, exon 4 of 20)	exon (NM_174941, exon 4 of 20)	11522	NM_174941	283316	Hs.631727	NM_174941	ENSG00000177675	CD163L1	CD163B|M160	CD163 molecule-like 1	protein-coding
chr12	18900232	18900401	Intergenic	LTR33|LTR|ERVL	9271	NM_033328	93661	Hs.131288	NM_033328	ENSG00000177938	CAPZA3	CAPPA3|Gsg3	capping protein (actin filament) muscle Z-line, alpha 3	protein-coding
chr12	19205301	19205470	Intergenic	Intergenic	-77241	NM_019012	54477	Hs.188614	NM_001143821	ENSG00000052126	PLEKHA5	PEPP-2|PEPP2	pleckstrin homology domain containing, family A member 5	protein-coding
chr12	15361029	15361198	intron (NM_032918, intron 2 of 4)	MLT2C1|LTR|ERVL	13298	NM_032918	85004	Hs.199487	NM_001190726	ENSG00000134533	RERG	-	RAS-like, estrogen-regulated, growth inhibitor	protein-coding
chr12	30186298	30186467	Intergenic	Intergenic	-248690	NM_175861	83857	Hs.401954	NM_001193451	ENSG00000133687	TMTC1	OLF|TMTC1A	transmembrane and tetratricopeptide repeat containing 1	protein-coding
chr12	790855	791024	Intergenic	MLT1I|LTR|ERVL-MaLR	-18184	NM_016533	4815	Hs.656450	NM_016533	ENSG00000171840	NINJ2	-	ninjurin 2	protein-coding
chr12	64575262	64575431	Intergenic	Intergenic	40730	NM_152440	144577	Hs.505871	NM_152440	ENSG00000174206	C12orf66	-	chromosome 12 open reading frame 66	protein-coding
chr12	260589	260758	intron (NM_001170738, intron 5 of 13)	L2c|LINE|L2	-2341	NR_033859	574538	Hs.589138	NR_033859		LOC574538	-	uncharacterized LOC574538	miscRNA
chr12	5389345	5389514	Intergenic	Intergenic	-151851	NM_001102654	4908	Hs.99171	NM_001102654	ENSG00000185652	NTF3	HDNF|NGF-2|NGF2|NT3	neurotrophin 3	protein-coding
chr12	28581938	28582107	intron (NM_018318, intron 7 of 11)	intron (NM_018318, intron 7 of 11)	171889	NM_018318	55297	Hs.653125	NM_018318	ENSG00000123106	CCDC91	p56	coiled-coil domain containing 91	protein-coding
chr12	1378793	1378962	intron (NM_178039, intron 13 of 17)	Charlie2a|DNA|hAT-Charlie	-230780	NR_028415	100292680	Hs.391695	NR_028415		LOC100292680	-	uncharacterized LOC100292680	miscRNA
chr12	26686628	26686797	intron (NM_002223, intron 37 of 56)	MLT1B|LTR|ERVL-MaLR	299419	NM_002223	3709	Hs.512235	NM_002223	ENSG00000123104	ITPR2	IP3R2	inositol 1,4,5-trisphosphate receptor, type 2	protein-coding
chr12	31670937	31671106	intron (NM_144973, intron 1 of 20)	intron (NM_144973, intron 1 of 20)	-71836	NR_046909	100874249	Hs.627628	NR_046909		DENND5B-AS1	-	DENND5B antisense RNA 1	miscRNA
chr12	6810769	6810938	promoter-TSS (NM_153685)	promoter-TSS (NM_153685)	-844	NM_153685	196500	Hs.740050	NM_001244014	ENSG00000139200	PIANP	C12orf53|PANP	PILR alpha associated neural protein	protein-coding
chr12	1046287	1046456	intron (NM_134424, intron 1 of 11)	LTR16E2|LTR|ERVL	12492	NM_134424	5893	Hs.410355	NM_134424	ENSG00000002016	RAD52	-	RAD52 homolog (S. cerevisiae)	protein-coding
chr12	4248784	4248953	Intergenic	Intergenic	-134034	NM_001759	894	Hs.376071	NM_001759	ENSG00000118971	CCND2	KIAK0002	cyclin D2	protein-coding
chr12	27668756	27668925	Intergenic	Intergenic	-8205	NM_177444	8496	Hs.172445	NM_001198915	ENSG00000110841	PPFIBP1	L2|SGT2|hSGT2|hSgt2p	PTPRF interacting protein, binding protein 1 (liprin beta 1)	protein-coding
chr12	4723310	4723479	TTS (NM_003845)	TTS (NM_003845)	24150	NM_003845	8798	Hs.439530	NM_003845	ENSG00000010219	DYRK4	-	dual-specificity tyrosine-(Y)-phosphorylation regulated kinase 4	protein-coding
chr12	5373273	5373442	Intergenic	MLT1H1|LTR|ERVL-MaLR	-167923	NM_001102654	4908	Hs.99171	NM_001102654	ENSG00000185652	NTF3	HDNF|NGF-2|NGF2|NT3	neurotrophin 3	protein-coding
chr12	19270739	19270908	Intergenic	L2c|LINE|L2	-11803	NM_019012	54477	Hs.188614	NM_001143821	ENSG00000052126	PLEKHA5	PEPP-2|PEPP2	pleckstrin homology domain containing, family A member 5	protein-coding
chr12	5093622	5093791	Intergenic	MLT1J1|LTR|ERVL-MaLR	-59379	NM_002234	3741	Hs.741439	NM_002234	ENSG00000130037	KCNA5	ATFB7|HCK1|HK2|HPCN1|KV1.5|PCN1	potassium voltage-gated channel, shaker-related subfamily, member 5	protein-coding
chr12	32514521	32514690	intron (NM_001714, intron 8 of 9)	intron (NM_001714, intron 8 of 9)	-140436	NM_139241	121512	Hs.117835	NM_139241	ENSG00000139132	FGD4	CMT4H|FRABP|ZFYVE6	FYVE, RhoGEF and PH domain containing 4	protein-coding
chr12	28298293	28298462	Intergenic	L2c|LINE|L2	-111756	NM_018318	55297	Hs.653125	NM_018318	ENSG00000123106	CCDC91	p56	coiled-coil domain containing 91	protein-coding
chr12	31892135	31892304	Intergenic	Intergenic	-10111	NR_004854	196394	Hs.740628	NM_001113402	ENSG00000151743	AMN1	-	antagonist of mitotic exit network 1 homolog (S. cerevisiae)	protein-coding
chr12	32040985	32041154	Intergenic	Intergenic	-71284	NM_018169	55196	Hs.445129	NM_018169	ENSG00000174718	KIAA1551	C12orf35	KIAA1551	protein-coding
chr12	46798530	46798699	Intergenic	MLT1A0|LTR|ERVL-MaLR	-31969	NM_018976	54407	Hs.221847	NM_018976	ENSG00000134294	SLC38A2	ATA2|PRO1068|SAT2|SNAT2	solute carrier family 38, member 2	protein-coding
chr12	119597418	119597587	3' UTR (NM_194286, exon 13 of 13)	3' UTR (NM_194286, exon 13 of 13)	-19093	NM_014365	26353	Hs.400095	NM_014365	ENSG00000152137	HSPB8	CMT2L|DHMN2|E2IG1|H11|HMN2|HMN2A|HSP22	heat shock 22kDa protein 8	protein-coding
chr12	108290387	108290556	Intergenic	Intergenic	7077	NR_037629	728739	Hs.741995	NR_037629		LOC728739	-	programmed cell death 2 pseudogene	pseudo
chr12	10463050	10463219	intron (NM_001114396, intron 4 of 6)	AluSz6|SINE|Alu	2717	NM_002262	3824	Hs.562457	NM_001114396	ENSG00000134539	KLRD1	CD94	killer cell lectin-like receptor subfamily D, member 1	protein-coding
chr12	32135822	32135991	exon (NM_018169, exon 4 of 6)	exon (NM_018169, exon 4 of 6)	10896	NR_046944	100873778		NR_046944		RNU6-78	-	RNA, U6 small nuclear 78	snRNA
chr12	21853741	21853910	Intergenic	Intergenic	-43036	NM_002300	3945	Hs.446149	NM_001174097	ENSG00000111716	LDHB	LDH-B|LDH-H|LDHBD|TRG-5	lactate dehydrogenase B	protein-coding
chr12	31140004	31140173	intron (NM_001080509, intron 7 of 7)	intron (NM_001080509, intron 7 of 7)	60250	NM_001080509	441631	Hs.505141	NM_001080509	ENSG00000110900	TSPAN11	VSSW1971	tetraspanin 11	protein-coding
chr12	22424564	22424733	intron (NM_003034, intron 2 of 4)	intron (NM_003034, intron 2 of 4)	63000	NM_003034	6489	Hs.408614	NM_003034	ENSG00000111728	ST8SIA1	GD3S|SIAT8|SIAT8-A|SIAT8A|ST8SiaI	ST8 alpha-N-acetyl-neuraminide alpha-2,8-sialyltransferase 1	protein-coding
chr12	33150240	33150409	Intergenic	Intergenic	-100544	NM_001005242	5318	Hs.164384	NM_001005242	ENSG00000057294	PKP2	ARVD9	plakophilin 2	protein-coding
chr12	6668656	6668825	intron (NM_001258310, intron 15 of 16)	intron (NM_001258310, intron 15 of 16)	-3491	NR_036467	25900	Hs.15243	NM_001039670	ENSG00000010295	IFFO1	HOM-TES-103|IFFO	intermediate filament family orphan 1	protein-coding
chr12	31632913	31633082	exon (NM_144973, exon 3 of 21)	exon (NM_144973, exon 3 of 21)	-109860	NR_046909	100874249	Hs.627628	NR_046909		DENND5B-AS1	-	DENND5B antisense RNA 1	miscRNA
chr12	1692726	1692895	intron (NM_152441, intron 1 of 1)	intron (NM_152441, intron 1 of 1)	10521	NM_152441	144699	Hs.367956	NM_152441	ENSG00000171823	FBXL14	Fbl14	F-box and leucine-rich repeat protein 14	protein-coding
chr12	7274548	7274717	TTS (NR_026947)	TTS (NR_026947)	6834	NM_031491	83758	Hs.246046	NM_031491	ENSG00000139194	RBP5	CRBP-III|CRBP3|CRBPIII	retinol binding protein 5, cellular	protein-coding
chr12	25473861	25474030	Intergenic	Intergenic	-70091	NM_033360	3845	Hs.505033	NM_004985	ENSG00000133703	KRAS	C-K-RAS|K-RAS2A|K-RAS2B|K-RAS4A|K-RAS4B|KI-RAS|KRAS1|KRAS2|NS|NS3|RASK2	v-Ki-ras2 Kirsten rat sarcoma viral oncogene homolog	protein-coding
chr12	56450579	56450748	Intergenic	L2a|LINE|L2	14977	NM_001029	6231	Hs.711461	NM_001029	ENSG00000197728	RPS26	DBA10|S26	ribosomal protein S26	protein-coding
chr12	13070630	13070799	Intergenic	Intergenic	1951	NR_030345	693199		NR_030345		MIR614	MIRN614|hsa-mir-614	microRNA 614	miscRNA
chr12	31902173	31902342	Intergenic	LTR8|LTR|ERV1	-20149	NR_004854	196394	Hs.740628	NM_001113402	ENSG00000151743	AMN1	-	antagonist of mitotic exit network 1 homolog (S. cerevisiae)	protein-coding
chr12	237488	237657	intron (NM_001170738, intron 3 of 13)	intron (NM_001170738, intron 3 of 13)	20760	NR_033859	574538	Hs.589138	NR_033859		LOC574538	-	uncharacterized LOC574538	miscRNA
chr12	56109287	56109456	promoter-TSS (NR_037658)	promoter-TSS (NR_037658)	-447	NR_037658	100528022	Hs.732037	NR_037658		BLOC1S1-RDH5	-	BLOC1S1-RDH5 readthrough	miscRNA
chr12	11149921	11150090	exon (NM_176889, exon 1 of 1)	exon (NM_176889, exon 1 of 1)	469	NM_176889	259295	Hs.686384	NM_176889	ENSG00000255837	TAS2R20	T2R20|T2R49|T2R56|TAS2R49	taste receptor, type 2, member 20	protein-coding
chr12	22847557	22847726	Intergenic	LTR9|LTR|ERV1	69565	NM_001039481	55500	Hs.29464	NM_001039481	ENSG00000139163	ETNK1	EKI|EKI 1|EKI1|Nbla10396	ethanolamine kinase 1	protein-coding
chr12	26298373	26298542	Intergenic	Intergenic	-20454	NM_030762	79365	Hs.177841	NM_030762	ENSG00000123095	BHLHE41	BHLHB3|DEC2|SHARP1|hDEC2	basic helix-loop-helix family, member e41	protein-coding
chr12	40876713	40876882	Intergenic	Intergenic	-209447	NM_001256063	1272	Hs.741112	NM_001256063	ENSG00000018236	CNTN1	F3|GP135	contactin 1	protein-coding
chr12	3999416	3999585	Intergenic	Intergenic	-16892	NM_020367	57097	Hs.657268	NM_020367	ENSG00000111224	PARP11	ARTD11|C12orf6	poly (ADP-ribose) polymerase family, member 11	protein-coding
chr12	54984102	54984271	Intergenic	Intergenic	-1743	NM_006741	5502	Hs.505662	NM_006741	ENSG00000135447	PPP1R1A	I1|IPP1	protein phosphatase 1, regulatory (inhibitor) subunit 1A	protein-coding
chr12	4007995	4008164	Intergenic	L3|LINE|CR1	-25471	NM_020367	57097	Hs.657268	NM_020367	ENSG00000111224	PARP11	ARTD11|C12orf6	poly (ADP-ribose) polymerase family, member 11	protein-coding
chr12	5988156	5988325	intron (NM_020373, intron 3 of 25)	intron (NM_020373, intron 3 of 25)	67158	NM_020373	57101	Hs.148970	NM_020373	ENSG00000047617	ANO2	C12orf3|TMEM16B	anoctamin 2	protein-coding
chr12	12489082	12489251	intron (NM_018050, intron 3 of 3)	L2a|LINE|L2	14003	NM_018050	54682	Hs.591145	NM_018050	ENSG00000111261	MANSC1	9130403P13Rik|LOH12CR3	MANSC domain containing 1	protein-coding
chr12	10545117	10545286	intron (NM_001199805, intron 5 of 12)	intron (NM_001199805, intron 5 of 12)	-2548	NM_007360	22914	Hs.387787	NM_007360	ENSG00000213809	KLRK1	CD314|D12S2489E|KLR|NKG2-D|NKG2D	killer cell lectin-like receptor subfamily K, member 1	protein-coding
chr12	12477066	12477235	Intergenic	Intergenic	26019	NM_018050	54682	Hs.591145	NM_018050	ENSG00000111261	MANSC1	9130403P13Rik|LOH12CR3	MANSC domain containing 1	protein-coding
chr12	6172762	6172931	intron (NM_000552, intron 12 of 51)	intron (NM_000552, intron 12 of 51)	60990	NM_000552	7450	Hs.440848	NM_000552	ENSG00000110799	VWF	F8VWF|VWD	von Willebrand factor	protein-coding
chr12	14994872	14995041	intron (NM_021071, intron 1 of 2)	LTR79|LTR|ERVL	1457	NM_021071	420	Hs.668803	NM_021071	ENSG00000111339	ART4	ARTC4|CD297|DO|DOK1	ADP-ribosyltransferase 4 (Dombrock blood group)	protein-coding
chr12	1306555	1306724	intron (NM_178039, intron 11 of 17)	intron (NM_178039, intron 11 of 17)	206235	NR_027946	23085	Hs.601216	NM_178039	ENSG00000082805	ERC1	Cast2|ELKS|RAB6IP2	ELKS/RAB6-interacting/CAST family member 1	protein-coding
chr12	31999392	31999561	Intergenic	Intergenic	-54301	NM_001013699	440093	Hs.448697	NM_001013699	ENSG00000188375	H3F3C	H3.5	H3 histone, family 3C	protein-coding
chr12	32059855	32060024	Intergenic	LTR4|LTR|ERV1	-52414	NM_018169	55196	Hs.445129	NM_018169	ENSG00000174718	KIAA1551	C12orf35	KIAA1551	protein-coding
chr12	13956223	13956392	intron (NM_000834, intron 2 of 12)	intron (NM_000834, intron 2 of 12)	176715	NM_000834	2904	Hs.654430	NM_000834	ENSG00000150086	GRIN2B	GluN2B|MRD6|NMDAR2B|NR2B|hNR3	glutamate receptor, ionotropic, N-methyl D-aspartate 2B	protein-coding
chr12	22209558	22209727	intron (NM_018686, intron 3 of 7)	L1MEg1|LINE|L1	10532	NM_018686	55907	Hs.311346	NM_018686	ENSG00000111726	CMAS	CSS	cytidine monophosphate N-acetylneuraminic acid synthetase	protein-coding
chr12	1460505	1460674	intron (NM_178039, intron 14 of 17)	L1MC|LINE|L1	-149068	NR_028415	100292680	Hs.391695	NR_028415		LOC100292680	-	uncharacterized LOC100292680	miscRNA
chr12	29666903	29667072	intron (NM_175861, intron 16 of 17)	intron (NM_175861, intron 16 of 17)	-16368	NM_183378	341350	Hs.674588	NM_183378	ENSG00000187950	OVCH1	OVCH	ovochymase 1	protein-coding
chr12	47720017	47720186	Intergenic	Intergenic	-109875	NR_026544	100233209	Hs.657722	NR_026544		PCED1B-AS1	-	PCED1B antisense RNA 1	miscRNA
chr12	19865054	19865223	Intergenic	Intergenic	271623	NM_001267043	121536	Hs.126497	NM_001114176	ENSG00000139154	AEBP2	-	AE binding protein 2	protein-coding
chr12	5680972	5681141	intron (NM_020373, intron 24 of 25)	intron (NM_020373, intron 24 of 25)	77758	NM_002527	4908	Hs.99171	NM_001102654	ENSG00000185652	NTF3	HDNF|NGF-2|NGF2|NT3	neurotrophin 3	protein-coding
chr12	2587941	2588110	intron (NM_001129838, intron 5 of 45)	intron (NM_001129838, intron 5 of 45)	209083	NR_046769	100874370	Hs.653548	NR_046769		CACNA1C-IT3	-	CACNA1C intronic transcript 3 (non-protein coding)	miscRNA
chr12	2227567	2227736	intron (NM_001129838, intron 2 of 45)	MIR|SINE|MIR	65235	NM_001129834	775	Hs.118262	NM_000719	ENSG00000151067	CACNA1C	CACH2|CACN2|CACNL1A1|CCHL1A1|CaV1.2|LQT8|TS	calcium channel, voltage-dependent, L type, alpha 1C subunit	protein-coding
chr12	16913262	16913431	Intergenic	AluJb|SINE|Alu	-152198	NR_045014	55885	Hs.504908	NM_001001395	ENSG00000048540	LMO3	RBTN3|RBTNL2|RHOM3|Rhom-3	LIM domain only 3 (rhombotin-like 2)	protein-coding
chr12	7009464	7009633	Intergenic	MER66A|LTR|ERV1	-4349	NM_001135217	10233	Hs.661103	NM_001135217	ENSG00000010626	LRRC23	LRPB7	leucine rich repeat containing 23	protein-coding
chr12	13069131	13069300	TTS (NR_030345)	TTS (NR_030345)	452	NR_030345	693199		NR_030345		MIR614	MIRN614|hsa-mir-614	microRNA 614	miscRNA
chr12	10754500	10754669	Intergenic	Intergenic	-2150	NR_028045	10748	Hs.159297	NM_006611		KLRAP1	KLRA#|KLRA1|LY49L|Ly-49L|Ly49	killer cell lectin-like receptor subfamily A pseudogene 1	pseudo
chr12	24230119	24230288	intron (NM_152989, intron 4 of 17)	intron (NM_152989, intron 4 of 17)	-126237	NM_001261415	6660	Hs.657542	NM_001261414	ENSG00000134532	SOX5	L-SOX5	SRY (sex determining region Y)-box 5	protein-coding
chr12	7635244	7635413	exon (NM_004244, exon 14 of 17)	exon (NM_004244, exon 14 of 17)	21086	NM_203416	9332	Hs.504641	NM_004244	ENSG00000177575	CD163	M130|MM130	CD163 molecule	protein-coding
chr12	60322138	60322307	Intergenic	L1MA3|LINE|L1	239104	NR_073056	9194	Hs.439643	NM_001270622	ENSG00000118596	SLC16A7	MCT2	solute carrier family 16, member 7 (monocarboxylic acid transporter 2)	protein-coding
chr12	34773219	34773388	Intergenic	LTR5B|LTR|ERVK	598087	NM_032834	84920	Hs.102971	NM_032834	ENSG00000139133	ALG10	DIE2|KCR1	asparagine-linked glycosylation 10, alpha-1,2-glucosyltransferase homolog (S. pombe)	protein-coding
chr12	872265	872434	intron (NM_014823, intron 1 of 25)	MER44B|DNA|TcMar-Tigger	10260	NM_018979	65125	Hs.356604	NM_001184985	ENSG00000060237	WNK1	HSAN2|HSN2|KDP|PRKWNK1|PSK|p65	WNK lysine deficient protein kinase 1	protein-coding
chr12	5543500	5543669	intron (NM_001102654, intron 1 of 1)	intron (NM_001102654, intron 1 of 1)	2304	NM_001102654	4908	Hs.99171	NM_001102654	ENSG00000185652	NTF3	HDNF|NGF-2|NGF2|NT3	neurotrophin 3	protein-coding
chr12	12232065	12232234	intron (NM_030766, intron 1 of 5)	L2b|LINE|L2	7747	NM_138722	79370	Hs.210343	NM_030766	ENSG00000121380	BCL2L14	BCLG	BCL2-like 14 (apoptosis facilitator)	protein-coding
chr12	3117789	3117958	intron (NM_003213, intron 3 of 12)	L2c|LINE|L2	49125	NM_201443	7004	Hs.94865	NM_003213	ENSG00000197905	TEAD4	EFTR-2|RTEF1|TCF13L1|TEF-3|TEF3|TEFR-1|hRTEF-1B	TEA domain family member 4	protein-coding
chr12	7102004	7102173	intron (NM_005768, intron 1 of 12)	L1MB7|LINE|L1	22144	NM_006331	10436	Hs.731673	NM_006331		EMG1	C2F|Grcc2f|NEP1	EMG1 nucleolar protein homolog (S. cerevisiae)	protein-coding
chr12	111463774	111463943	Intergenic	Intergenic	-7970	NM_015267	23316	Hs.124953	NM_015267	ENSG00000111249	CUX2	CDP2|CUTL2	cut-like homeobox 2	protein-coding
chr12	26587362	26587531	intron (NM_002223, intron 48 of 56)	intron (NM_002223, intron 48 of 56)	238940	NM_005086	8082	Hs.183428	NM_001135823	ENSG00000123096	SSPN	DAGA5|KRAG|NSPN|SPN1|SPN2	sarcospan	protein-coding
chr12	1473632	1473801	intron (NM_178039, intron 14 of 17)	intron (NM_178039, intron 14 of 17)	-135941	NR_028415	100292680	Hs.391695	NR_028415		LOC100292680	-	uncharacterized LOC100292680	miscRNA
chr12	29649596	29649765	intron (NM_183378, intron 1 of 27)	intron (NM_183378, intron 1 of 27)	939	NM_183378	341350	Hs.674588	NM_183378	ENSG00000187950	OVCH1	OVCH	ovochymase 1	protein-coding
chr12	17168978	17169147	Intergenic	L1PBa|LINE|L1	27381	NR_036619	728622	Hs.741380	NR_036619		SKP1P2	SKP1B|p19B	S-phase kinase-associated protein 1 pseudogene 2	pseudo
chr12	2728671	2728840	intron (NM_001129838, intron 29 of 45)	intron (NM_001129838, intron 29 of 45)	71568	NR_045725	100652846	Hs.683896	NR_045725		CACNA1C-AS1	-	CACNA1C antisense RNA 1	miscRNA
chr12	1957157	1957326	intron (NM_172364, intron 23 of 37)	L1MB8|LINE|L1	27808	NM_001039029	654429	Hs.585579	NM_001039029	ENSG00000166159	LRTM2	-	leucine-rich repeats and transmembrane domains 2	protein-coding
chr12	32393906	32394075	intron (NM_001003398, intron 2 of 8)	intron (NM_001003398, intron 2 of 8)	133805	NM_001714	636	Hs.505202	NM_001003398	ENSG00000151746	BICD1	BICD	bicaudal D homolog 1 (Drosophila)	protein-coding
chr12	27716479	27716648	intron (NM_177444, intron 1 of 28)	MLT1E2|LTR|ERVL-MaLR	39518	NM_001198916	8496	Hs.172445	NM_001198915	ENSG00000110841	PPFIBP1	L2|SGT2|hSGT2|hSgt2p	PTPRF interacting protein, binding protein 1 (liprin beta 1)	protein-coding
chr12	163891	164060	Intergenic	Intergenic	-12074	NM_001170738	440073	Hs.536319	NM_001170738	ENSG00000120645	IQSEC3	-	IQ motif and Sec7 domain 3	protein-coding
chr12	20738907	20739076	intron (NM_001244683, intron 1 of 14)	L2c|LINE|L2	14193	NM_001244683	5139	Hs.737522	NM_000921	ENSG00000172572	PDE3A	CGI-PDE|CGI-PDE A|CGI-PDE-A	phosphodiesterase 3A, cGMP-inhibited	protein-coding
chr12	14933958	14934127	Intergenic	MamRep605|Unknown|Unknown	6772	NR_027716	55766	Hs.524280	NM_177925	ENSG00000246705	H2AFJ	H2AJ	H2A histone family, member J	protein-coding
chr12	2554548	2554717	intron (NM_001129838, intron 3 of 45)	intron (NM_001129838, intron 3 of 45)	175690	NR_046769	100874370	Hs.653548	NR_046769		CACNA1C-IT3	-	CACNA1C intronic transcript 3 (non-protein coding)	miscRNA
chr12	5587970	5588139	intron (NM_001102654, intron 1 of 1)	Mam_R4|LINE|Dong-R4	-15244	NM_002527	4908	Hs.99171	NM_001102654	ENSG00000185652	NTF3	HDNF|NGF-2|NGF2|NT3	neurotrophin 3	protein-coding
chr12	12488111	12488280	intron (NM_018050, intron 3 of 3)	L2a|LINE|L2	14974	NM_018050	54682	Hs.591145	NM_018050	ENSG00000111261	MANSC1	9130403P13Rik|LOH12CR3	MANSC domain containing 1	protein-coding
chr12	863627	863796	intron (NM_014823, intron 1 of 25)	intron (NM_014823, intron 1 of 25)	1622	NM_018979	65125	Hs.356604	NM_001184985	ENSG00000060237	WNK1	HSAN2|HSN2|KDP|PRKWNK1|PSK|p65	WNK lysine deficient protein kinase 1	protein-coding
chr12	1980348	1980517	intron (NM_172364, intron 18 of 37)	(TG)n|Simple_repeat|Simple_repeat	47438	NM_172364	93589	Hs.13768	NM_172364	ENSG00000151062	CACNA2D4	RCD4	calcium channel, voltage-dependent, alpha 2/delta subunit 4	protein-coding
chr12	31454049	31454218	intron (NM_001135812, intron 1 of 5)	intron (NM_001135812, intron 1 of 5)	-23117	NR_026806	79857	Hs.534485	NM_024799		FLJ13224	-	uncharacterized LOC79857	miscRNA
chr12	13045045	13045214	intron (NM_003979, intron 1 of 3)	intron (NM_003979, intron 1 of 3)	1173	NM_003979	9052	Hs.631733	NM_003979	ENSG00000013588	GPRC5A	GPCR5A|RAI3|RAIG1	G protein-coupled receptor, family C, group 5, member A	protein-coding
chr12	5738443	5738612	intron (NM_020373, intron 17 of 25)	intron (NM_020373, intron 17 of 25)	135229	NM_002527	4908	Hs.99171	NM_001102654	ENSG00000185652	NTF3	HDNF|NGF-2|NGF2|NT3	neurotrophin 3	protein-coding
chr12	32062241	32062410	Intergenic	HERVFH19-int|LTR|ERV1	-50028	NM_018169	55196	Hs.445129	NM_018169	ENSG00000174718	KIAA1551	C12orf35	KIAA1551	protein-coding
chr12	15592641	15592810	intron (NM_002848, intron 1 of 25)	intron (NM_002848, intron 1 of 25)	-106553	NM_030671	5800	Hs.160871	NM_002848	ENSG00000151490	PTPRO	GLEPP1|NPHS6|PTP-OC|PTP-U2|PTPROT|PTPU2|R-PTP-O	protein tyrosine phosphatase, receptor type, O	protein-coding
chr12	56650009	56650178	intron (NM_173595, intron 4 of 27)	intron (NM_173595, intron 4 of 27)	2050	NM_173595	283373	Hs.524506	NM_173595	ENSG00000139645	ANKRD52	ANKRD33	ankyrin repeat domain 52	protein-coding
chr12	30658142	30658311	Intergenic	MIRb|SINE|MIR	171952	NM_001190995	10526	Hs.505136	NM_001190995	ENSG00000133704	IPO8	RANBP8	importin 8	protein-coding
chr12	13448004	13448173	Intergenic	Intergenic	81591	NR_036555	283422	Hs.448717	NM_182558		C12orf36	-	chromosome 12 open reading frame 36	miscRNA
chr12	130760902	130761071	Intergenic	Intergenic	-61447	NM_004764	9271	Hs.405659	NM_001190971	ENSG00000125207	PIWIL1	HIWI|MIWI|PIWI	piwi-like 1 (Drosophila)	protein-coding
chr12	1090493	1090662	Intergenic	MLT1C-int|LTR|ERVL-MaLR	-9827	NR_027949	23085	Hs.601216	NM_178039	ENSG00000082805	ERC1	Cast2|ELKS|RAB6IP2	ELKS/RAB6-interacting/CAST family member 1	protein-coding
chr12	105866744	105866913	Intergenic	MLT1H1|LTR|ERVL-MaLR	142414	NM_001145199	387882	Hs.368938	NM_207376	ENSG00000235162	C12orf75	AGD3|OCC-1|OCC1	chromosome 12 open reading frame 75	protein-coding
chr12	33168867	33169036	Intergenic	L2c|LINE|L2	-119171	NM_001005242	5318	Hs.164384	NM_001005242	ENSG00000057294	PKP2	ARVD9	plakophilin 2	protein-coding
chr12	132075610	132075779	Intergenic	Intergenic	-119938	NM_004592	6433	Hs.308171	NM_001261411	ENSG00000061936	SFSWAP	SFRS8|SWAP	splicing factor, suppressor of white-apricot homolog (Drosophila)	protein-coding
chr12	11482151	11482320	Intergenic	Intergenic	-18866	NM_002723	5545	Hs.528651	NM_001261399	ENSG00000230657	PRB4	Po	proline-rich protein BstNI subfamily 4	protein-coding
chr12	6685532	6685701	intron (NM_001273, intron 37 of 39)	AluJb|SINE|Alu	5159	NR_003012	677780	Hs.689692	NR_003012		SCARNA11	ACA57	small Cajal body-specific RNA 11	miscRNA
chr12	10059075	10059244	Intergenic	HERVI-int|LTR|ERV1	25071	NM_001190765	100431172	Hs.725113	NM_001190765	ENSG00000256797	KLRF2	NKp65	killer cell lectin-like receptor subfamily F, member 2	protein-coding
chr12	32059345	32059514	Intergenic	HERVFH19-int|LTR|ERV1	-52924	NM_018169	55196	Hs.445129	NM_018169	ENSG00000174718	KIAA1551	C12orf35	KIAA1551	protein-coding
chr12	32176569	32176738	Intergenic	MER4A|LTR|ERV1	-29851	NR_046944	100873778		NR_046944		RNU6-78	-	RNA, U6 small nuclear 78	snRNA
chr12	33683839	33684008	Intergenic	L2c|LINE|L2	-91169	NM_198992	341359	Hs.118703	NM_198992	ENSG00000110975	SYT10	-	synaptotagmin X	protein-coding
chr12	2612218	2612387	intron (NM_001129838, intron 7 of 45)	MER5A|DNA|hAT-Charlie	188021	NR_045725	100652846	Hs.683896	NR_045725		CACNA1C-AS1	-	CACNA1C antisense RNA 1	miscRNA
chr12	131657356	131657525	intron (NR_026670, intron 1 of 4)	L1MA6|LINE|L1	7884	NR_026670	116437	Hs.675497	NR_026670		LOC116437	-	uncharacterized LOC116437	miscRNA
chr12	106527201	106527370	intron (NM_014840, intron 1 of 6)	intron (NM_014840, intron 1 of 6)	6526	NM_014840	9891	Hs.740457	NM_014840	ENSG00000074590	NUAK1	ARK5	NUAK family, SNF1-like kinase, 1	protein-coding
chr12	14106127	14106296	intron (NM_000834, intron 1 of 12)	MLT1G3|LTR|ERVL-MaLR	26811	NM_000834	2904	Hs.654430	NM_000834	ENSG00000150086	GRIN2B	GluN2B|MRD6|NMDAR2B|NR2B|hNR3	glutamate receptor, ionotropic, N-methyl D-aspartate 2B	protein-coding
chr12	30194820	30194989	Intergenic	Intergenic	-257212	NM_175861	83857	Hs.401954	NM_001193451	ENSG00000133687	TMTC1	OLF|TMTC1A	transmembrane and tetratricopeptide repeat containing 1	protein-coding
chr12	5707263	5707432	intron (NM_020373, intron 21 of 25)	intron (NM_020373, intron 21 of 25)	104049	NM_002527	4908	Hs.99171	NM_001102654	ENSG00000185652	NTF3	HDNF|NGF-2|NGF2|NT3	neurotrophin 3	protein-coding
[truncated: 12,117 more rows]
